# Supplementary material for: Border Control for Infectious Respiratory Disease Pandemics: A Modelling Study for H1N1 and Four Strains of SARS-CoV-2
Source: MDPI journal article supplement (doi:10.3390/v15040978), 2023-04-16
Supplement: s1 [file s1]

## Document S1. Viral load curve parameter distributions and hyperparameters

**Table S1. Distributions and means of log-viral load curve parameters' underlying normal variables**

| Disease-variant               | Asymptomatic / symptomatic | Parameter                           | Distribution | Mean (if log-normal, mean of log) |
|-------------------------------|----------------------------|-------------------------------------|--------------|-----------------------------------|
| COVID-19 prealpha             | Both                       | Initial log-viral load              | Constant     | 1.49                              |
|                               |                            | Rate of increase in log-viral load  | Log-normal   | 1.18                              |
|                               |                            | Peak log-viral load                 | Normal       | 8.14                              |
|                               |                            | Rate of decrease in log-viral load  | Normal       | 0.69                              |
|                               | Symptomatic                | Days from peak to onset of symptoms | Normal       | 0.6                               |
| COVID-19 alpha                | Both                       | Initial log-viral load              | Constant     | 1.49                              |
|                               |                            | Rate of increase in log-viral load  | Log-normal   | 1.14                              |
|                               |                            | Peak log-viral load                 | Normal       | 8.14                              |
|                               |                            | Rate of decrease in log-viral load  | Normal       | 0.82                              |
|                               | Symptomatic                | Days from peak to onset of symptoms | Normal       | 0.6                               |
| COVID-19 delta (unvaccinated) | Both                       | Initial log-viral load              | Constant     | 1.49                              |
|                               |                            | Rate of increase in log-viral load  | Log-normal   | 1.03                              |
|                               |                            | Peak log-viral load                 | Normal       | 8.14                              |
|                               |                            | Rate of decrease in log-viral load  | Normal       | 0.79                              |
|                               | Symptomatic                | Days from peak to onset of symptoms | Normal       | 0.6                               |
| COVID-19 delta (vaccinated)   | Both                       | Initial log-viral load              | Constant     | 1.49                              |
|                               |                            | Rate of increase in log-viral load  | Log-normal   | 0.99                              |
|                               |                            | Peak log-viral load                 | Normal       | 8.14                              |
|                               |                            | Rate of decrease in log-viral load  | Normal       | 0.95                              |
|                               | Symptomatic                | Days from peak to onset of symptoms | Normal       | 0.6                               |
| COVID-19 omicron (vaccinated) | Both                       | Initial log-viral load              | Constant     | 1.0084                            |

|                  |              |                                     |            |          |
|------------------|--------------|-------------------------------------|------------|----------|
|                  |              | Rate of increase in log-viral load  | Log-normal | 0.99     |
|                  |              | Peak log-viral load                 | Normal     | 7.6584   |
|                  |              | Rate of decrease in log-viral load  | Normal     | 0.95     |
|                  | Symptomatic  | Days from peak to onset of symptoms | Normal     | 0.6      |
| Influenza A-H1N1 | Asymptomatic | Initial log-viral load              | Constant   | 0        |
|                  |              | Rate of increase in log-viral load  | Log-normal | -0.30231 |
|                  |              | Peak log-viral load                 | Normal     | 1.72     |
|                  |              | Rate of decrease in log-viral load  | Log-normal | -0.41705 |
|                  | Symptomatic  | Initial log-viral load              | Constant   | 0        |
|                  |              | Rate of increase in log-viral load  | Log-normal | 0.69197  |
|                  |              | Peak log-viral load                 | Normal     | 4.60588  |
|                  |              | Rate of decrease in log-viral load  | Log-normal | 0.18735  |
|                  |              | Days from peak to onset of symptoms | Normal     | -0.07353 |

**Table S2. Covariance matrix of log-viral load curve parameters' underlying normal variables for COVID-19 prealpha**

|                                                        | Initial log-viral load | Rate of increase in log-viral load | Peak log-viral load | Rate of decrease in log-viral load | Days from peak to onset of symptoms (symptomatic only) |
|--------------------------------------------------------|------------------------|------------------------------------|---------------------|------------------------------------|--------------------------------------------------------|
| Initial log-viral load                                 | 0                      | 0                                  | 0                   | 0                                  | 0                                                      |
| Rate of increase in log-viral load                     | 0                      | 0.09090                            | 0.01166             | -0.00342                           | 0                                                      |
| Peak log-viral load                                    | 0                      | 0.01166                            | 0.0081              | -0.00238                           | 0                                                      |
| Rate of decrease in log-viral load                     | 0                      | -0.00342                           | -0.00238            | 0.0036                             | 0                                                      |
| Days from peak to onset of symptoms (symptomatic only) | 0                      | 0                                  | 0                   | 0                                  | 0.0225                                                 |

**Table S3. Covariance matrix of log-viral load curve parameters' underlying normal variables for COVID-19 alpha**

|                                                        | Initial log-viral load | Rate of increase in log-viral load | Peak log-viral load | Rate of decrease in log-viral load | Days from peak to onset of symptoms (symptomatic only) |
|--------------------------------------------------------|------------------------|------------------------------------|---------------------|------------------------------------|--------------------------------------------------------|
| Initial log-viral load                                 | 0                      | 0                                  | 0                   | 0                                  | 0                                                      |
| Rate of increase in log-viral load                     | 0                      | 0.1024                             | 0.01241             | -0.00455                           | 0                                                      |
| Peak log-viral load                                    | 0                      | 0.01241                            | 0.0081              | -0.00297                           | 0                                                      |
| Rate of decrease in log-viral load                     | 0                      | -0.00455                           | -0.00297            | 0.00563                            | 0                                                      |
| Days from peak to onset of symptoms (symptomatic only) | 0                      | 0                                  | 0                   | 0                                  | 0.0225                                                 |

**Table S4. Covariance matrix of log-viral load curve parameters' underlying normal variables for COVID-19 delta (unvaccinated)**

|                                                        | Initial log-viral load | Rate of increase in log-viral load | Peak log-viral load | Rate of decrease in log-viral load | Days from peak to onset of symptoms (symptomatic only) |
|--------------------------------------------------------|------------------------|------------------------------------|---------------------|------------------------------------|--------------------------------------------------------|
| Initial log-viral load                                 | 0                      | 0                                  | 0                   | 0                                  | 0                                                      |
| Rate of increase in log-viral load                     | 0                      | 0.11223                            | 0.01303             | -0.00796                           | 0                                                      |
| Peak log-viral load                                    | 0                      | 0.01303                            | 0.0081              | -0.00495                           | 0                                                      |
| Rate of decrease in log-viral load                     | 0                      | -0.00796                           | -0.00495            | 0.01563                            | 0                                                      |
| Days from peak to onset of symptoms (symptomatic only) | 0                      | 0                                  | 0                   | 0                                  | 0.0225                                                 |

**Table S5. Covariance matrix of log-viral load curve parameters' underlying normal variables for COVID-19 delta (vaccinated) and omicron (vaccinated)**

|                                                        | Initial log-viral load | Rate of increase in log-viral load | Peak log-viral load | Rate of decrease in log-viral load | Days from peak to onset of symptoms (symptomatic only) |
|--------------------------------------------------------|------------------------|------------------------------------|---------------------|------------------------------------|--------------------------------------------------------|
| Initial log-viral load                                 | 0                      | 0                                  | 0                   | 0                                  | 0                                                      |
| Rate of increase in log-viral load                     | 0                      | 0.10563                            | 0.01262             | -0.00709                           | 0                                                      |
| Peak log-viral load                                    | 0                      | 0.01262                            | 0.0081              | -0.00455                           | 0                                                      |
| Rate of decrease in log-viral load                     | 0                      | -0.00709                           | -0.00455            | 0.01323                            | 0                                                      |
| Days from peak to onset of symptoms (symptomatic only) | 0                      | 0                                  | 0                   | 0                                  | 0.0225                                                 |

**Table S6. Covariance matrix of log-viral load curve parameters' underlying normal variables for influenza A-H1N1 (asymptomatic)**

|                                    | Initial log-viral load | Rate of increase in log-viral load | Peak log-viral load | Rate of decrease in log-viral load |
|------------------------------------|------------------------|------------------------------------|---------------------|------------------------------------|
| Initial log-viral load             | 0                      | 0                                  | 0                   | 0                                  |
| Rate of increase in log-viral load | 0                      | 0.14266                            | -0.03314            | 0.10667                            |
| Peak log-viral load                | 0                      | -0.03314                           | 0.45511             | -0.08302                           |
| Rate of decrease in log-viral load | 0                      | 0.10667                            | -0.08302            | 0.10516                            |

**Table S7. Covariance matrix of log-viral load curve parameters' underlying normal variables for influenza A-H1N1 (symptomatic)**

|                                     | Initial log-viral load | Rate of increase in log-viral load | Peak log-viral load | Rate of decrease in log-viral load | Days from peak to onset of symptoms |
|-------------------------------------|------------------------|------------------------------------|---------------------|------------------------------------|-------------------------------------|
| Initial log-viral load              | 0                      | 0                                  | 0                   | 0                                  | 0                                   |
| Rate of increase in log-viral load  | 0                      | 0.27304                            | 0.48881             | 0.08925                            | -0.00734                            |
| Peak log-viral load                 | 0                      | 0.48881                            | 2.25512             | 0.48155                            | 0.07166                             |
| Rate of decrease in log-viral load  | 0                      | 0.08925                            | 0.48155             | 0.29023                            | 0.04914                             |
| Days from peak to onset of symptoms | 0                      | -0.00734                           | 0.07166             | 0.04914                            | 0.66867                             |
