# Supplementary material for: Border Control for Infectious Respiratory Disease Pandemics: A Modelling Study for H1N1 and Four Strains of SARS-CoV-2
Source: Viruses. 2023 Apr 16;15(4):978. doi: 10.3390/v15040978 (PMC10144227; doi:10.3390/v15040978)
Supplement: Supplementary file 1 [file viruses-15-00978-s001.zip]

Archive with 10 entries (10 files):
- Document S1 - Viral load curve parameter distributions and hyperparameters.pdf
- Document S2 - Variable descriptions for Tables S1.1-S1.6.txt
- Document S3 - Variable descriptions for Table S2.1.txt
- Table S1.1 - Outcomes for Prealpha.csv
- Table S1.2 - Outcomes for Alpha.csv
- Table S1.3 - Outcomes for Delta (Unvac).csv
- Table S1.4 - Outcomes for Delta (Vac).csv
- Table S1.5 - Outcomes for Omicron (Vac).csv
- Table S1.6 - Outcomes for Influenza A H1N1.csv
- Table S2.1 - Min Quarantine Lengths.csv
