# Supplementary material for: Border Control for Infectious Respiratory Disease Pandemics: A Modelling Study for H1N1 and Four Strains of SARS-CoV-2
Source: Viruses. 2023 Apr 16;15(4):978. doi: 10.3390/v15040978 (PMC10144227; doi:10.3390/v15040978)
Supplement: Supplementary file 1 [file viruses-15-00978-s001.zip › Document S2 - Variable descriptions for Tables S1.1-S1.6.txt]

Note: All statistics (means, standard deviations, etc.) are across 1000 iterations of infected traveller groups, as described in the paper.

StrategyNo - Strategy number identifying a strategy family, as used in paper

StrategyDescription - Short description of strategy family

QDays - Number of days of quarantine for a given strategy

TR_Sympt_Mean - Mean total transmission risk over days on which travellers were symptomatic and out of quarantine

TR_Sympt_SD - Standard deviation of total transmission risk over days on which travellers were symptomatic and out of quarantine

TR_Sympt_2_5th_Percentile - 2.5th percentile of total transmission risk over days on which travellers were symptomatic and out of quarantine

TR_Sympt_97_5th_Percentile - 97.5th percentile of total transmission risk over days on which travellers were symptomatic and out of quarantine

TR_NoSympt_Mean - Mean total transmission risk over days on which travellers were asymptomatic and out of quarantine

TR_NoSympt_SD - Standard deviation of total transmission risk over days on which travellers were asymptomatic and out of quarantine

TR_NoSympt_2_5th_Percentile - 2.5th percentile of total transmission risk over days on which travellers were asymptomatic and out of quarantine

TR_NoSympt_97_5th_Percentile - 97.5th percentile of total transmission risk over days on which travellers were asymptomatic and out of quarantine

TR_Total_Mean - Mean total transmission risk over days on which travellers were out of quarantine

TR_Total_SD - Standard deviation of total transmission risk over days on which travellers were out of quarantine

TR_Total_2_5th_Percentile - 2.5th percentile of total transmission risk over days on which travellers were out of quarantine

TR_Total_97_5th_Percentile - 97.5th percentile of total transmission risk over days on which travellers were out of quarantine

Missed_Proportion_Mean - Mean proportion of travellers undiagnosed and unrecovered by end of quarantine

Missed_Proportion_Mean - Standard deviation of proportion of travellers undiagnosed and unrecovered by end of quarantine

Missed_Proportion_2_5th_Percentile - 2.5th percentile of proportion of travellers undiagnosed and unrecovered by end of quarantine

Missed_Proportion_97_5th_Percentile - 97.5th percentile of proportion of travellers undiagnosed and unrecovered by end of quarantine
