# Supplementary material for: Border Control for Infectious Respiratory Disease Pandemics: A Modelling Study for H1N1 and Four Strains of SARS-CoV-2
Source: Viruses. 2023 Apr 16;15(4):978. doi: 10.3390/v15040978 (PMC10144227; doi:10.3390/v15040978)
Supplement: Supplementary file 1 [file viruses-15-00978-s001.zip › Document S3 - Variable descriptions for Table S2.1.txt]

Disease - Disease-variant

StrategyNo - Number of strategy family

StrategyDescription - Short description of strategy family

Threshold - Logarithm (base 10) of total TR in given strategy to that in baseline scenario (that is, with no testing or quarantine)

EarliestDay - Minimum number of days of quarantine needed with current strategy family and disease to reduce log total TR below given threshold (22 indicates more than 21 days)
