# Supplementary material for: Border Control for Infectious Respiratory Disease Pandemics: A Modelling Study for H1N1 and Four Strains of SARS-CoV-2
Source: Viruses. 2023 Apr 16;15(4):978. doi: 10.3390/v15040978 (PMC10144227; doi:10.3390/v15040978)
Supplement: Supplementary file 1 [file viruses-15-00978-s001.zip › Table S1.1 - Outcomes for Prealpha.csv]

StrategyNo	StrategyDescription	QDays	TR_Sympt_Mean	TR_Sympt_SD	TR_Sympt_2_5th_Percentile	TR_Sympt_97_5th_Percentile	TR_NoSympt_Mean	TR_NoSympt_SD	TR_NoSympt_2_5th_Percentile	TR_NoSympt_97_5th_Percentile	TR_Total_Mean	TR_Total_SD	TR_Total_2_5th_Percentile	TR_Total_97_5th_Percentile	Missed_Proportion_Mean	Missed_Proportion_SD	Missed_Proportion_2_5th_Percentile	Missed_Proportion_97_5th_Percentile
1	Quarantine Only	0	3952.56897533694	53.4441354630245	3847.81846982941	4057.31948084446	9782.54749877145	94.4921631519128	9597.3428589937	9967.7521385492	13735.1164741084	118.671715061639	13502.5199125876	13967.7130356292	0.947173704527071	0.00151522000068356	0.944203873325731	0.950143535728411
1	Quarantine Only	1	2696.26345454102	43.6989274949447	2610.61355665093	2781.91335243111	7311.82972566915	80.1317304936006	7154.77153390169	7468.88791743661	10008.0931802102	101.225549365472	9809.69110345384	10206.4952569665	0.815114177671398	0.00244260227859801	0.810326677205346	0.81990167813745
1	Quarantine Only	2	1443.06387199299	31.132449216784	1382.0442715281	1504.08347245789	4839.06594215222	63.8077071530901	4714.00283613216	4964.12904817228	6282.12981414521	80.6606022052099	6124.035033823	6440.22459446743	0.683022814084999	0.00304233195501078	0.677059843453177	0.68898578471682
1	Quarantine Only	3	468.174248477815	16.4937030446805	435.846590510241	500.501906445389	2384.88296469533	41.7369965521281	2303.07845145316	2466.6874779375	2853.05721317314	50.6776331787395	2753.72905214282	2952.38537420347	0.560851554118513	0.0033032235782994	0.554377235905047	0.56732587233198
1	Quarantine Only	4	71.8541445621651	6.14861722482569	59.8028548015068	83.9054343228235	806.467313520899	20.5896167930706	766.11166460648	846.822962435317	878.321458083064	23.7408685195062	831.789355784832	924.853560381296	0.474743249296751	0.00335116536141271	0.468174965188382	0.48131153340512
1	Quarantine Only	5	7.9743716712232	2.03718881337704	3.98148159700419	11.9672617454422	231.229169945009	8.01505943379051	215.519653454779	246.938686435238	239.203541616232	8.88655843683226	221.785887080041	256.621196152423	0.415872190157682	0.00331021606501063	0.409384166670261	0.422360213645102
1	Quarantine Only	6	0.836014241278013	0.629733859587832	-0.398264123514137	2.07029260607016	59.8763136333461	2.88487507849107	54.2219584795036	65.5306687871886	60.7123278746242	3.15180977607052	54.5347807135259	66.8898750357224	0.362282215890953	0.00320808067669844	0.355994377764624	0.368570054017281
1	Quarantine Only	7	0.0805755219074352	0.192479696901079	-0.29668468401868	0.457835727833551	14.6232327175046	0.947813629393372	12.7655180038936	16.4809474311156	14.703808239412	1.0209310010609	12.7027834773327	16.7048330014914	0.309245234073002	0.00306789424823565	0.303232161346461	0.315258306799544
1	Quarantine Only	8	0.00990556877181576	0.0693812801841726	-0.126081740389163	0.145892877932794	3.49795778280874	0.320815000811291	2.86916038121861	4.12675518439887	3.50786335158055	0.352064722373835	2.81781649572784	4.19791020743327	0.256347786931364	0.00293775013729118	0.250589796662273	0.262105777200454
1	Quarantine Only	9	0.0015331696662659	0.0246226697659954	-0.0467272630750851	0.0497936024076169	0.83715242679677	0.11451669869277	0.612699697358941	1.0616051562346	0.838685596463036	0.128611467548147	0.586607120068668	1.0907640728574	0.203414424285061	0.00269905949810578	0.198124267668773	0.208704580901348
1	Quarantine Only	10	0.000730683453626183	0.0165953128812744	-0.0317961297936716	0.033257496700924	0.202896067099945	0.0498511978826733	0.105187719249906	0.300604414949985	0.203626750553571	0.0613561890307993	0.0833686200532047	0.323884881053938	0.150544041598674	0.00233166721700078	0.145973973853352	0.155114109343995
1	Quarantine Only	11	0	0	0	0	0.0488645045624897	0.0118081633264656	0.0257205044426171	0.0720085046823622	0.0488645045624897	0.0118081633264656	0.0257205044426171	0.0720085046823622	0.09790997646494	0.00190429266510783	0.0941775628413286	0.101642390088551
1	Quarantine Only	12	0	0	0	0	0.0114961468711014	0.00265281815072282	0.0062966232956847	0.0166956704465181	0.0114961468711014	0.00265281815072282	0.0062966232956847	0.0166956704465181	0.0498445650047219	0.00140677100101956	0.0470872938427236	0.0526018361667202
1	Quarantine Only	13	0	0	0	0	0.00244363466629153	0.000560185998823366	0.00134567010859773	0.00354159922398532	0.00244363466629153	0.000560185998823366	0.00134567010859773	0.00354159922398532	0.017709027333198	0.000855832696660375	0.0160315952477436	0.0193864594186523
1	Quarantine Only	14	0	0	0	0	0.000439106353637843	0.000127436206502989	0.000189331388891983	0.000688881318383702	0.000439106353637843	0.000127436206502989	0.000189331388891983	0.000688881318383702	0.00433214805495383	0.000434139996489442	0.00348123366183453	0.00518306244807314
1	Quarantine Only	15	0	0	0	0	6.57590732205352e-05	3.30971376524926e-05	8.88683421649658e-07	0.000130629463019421	6.57590732205352e-05	3.30971376524926e-05	8.88683421649658e-07	0.000130629463019421	0.000779140867488906	0.000179551358261385	0.000427220205296592	0.00113106152968122
1	Quarantine Only	16	0	0	0	0	8.51815477726434e-06	9.87664286437234e-06	-1.08400652369055e-05	2.78763747914341e-05	8.51815477726434e-06	9.87664286437234e-06	-1.08400652369055e-05	2.78763747914341e-05	0.000114070679052066	7.12880206401047e-05	-2.56538414025393e-05	0.000253795199506671
1	Quarantine Only	17	0	0	0	0	1.00850401952521e-06	3.18343153191617e-06	-5.23102178303047e-06	7.24802982208089e-06	1.00850401952521e-06	3.18343153191617e-06	-5.23102178303047e-06	7.24802982208089e-06	1.36135473843707e-05	2.42127982206245e-05	-3.38435371280532e-05	6.10706318967946e-05
1	Quarantine Only	18	0	0	0	0	1.38094274612711e-07	1.16738768894439e-06	-2.14998559571829e-06	2.42617414494371e-06	1.38094274612711e-07	1.16738768894439e-06	-2.14998559571829e-06	2.42617414494371e-06	1.71998018506755e-06	8.54240055362007e-06	-1.50231249000278e-05	1.84630852701629e-05
1	Quarantine Only	19	0	0	0	0	2.83684113809194e-08	4.58674232338352e-07	-8.7063308400225e-07	9.27369906764089e-07	2.83684113809194e-08	4.58674232338352e-07	-8.7063308400225e-07	9.27369906764089e-07	3.08855004639279e-07	3.68049710673664e-06	-6.90491932456453e-06	7.52262933384309e-06
1	Quarantine Only	20	0	0	0	0	7.39346167499765e-09	1.78230529058668e-07	-3.41938375279992e-07	3.56725298629988e-07	7.39346167499765e-09	1.78230529058668e-07	-3.41938375279992e-07	3.56725298629988e-07	8.75944562777791e-08	1.95769123275791e-06	-3.74948035992773e-06	3.92466927248329e-06
1	Quarantine Only	21	0	0	0	0	2.00411934639741e-09	6.33758183742379e-08	-1.22212484667109e-07	1.26220723359904e-07	2.00411934639741e-09	6.33758183742379e-08	-1.22212484667109e-07	1.26220723359904e-07	4.38173692051529e-08	1.38562687764805e-06	-2.67201131098503e-06	2.75964604939533e-06
2	PreTest, EntryTest, PCR 0D	0	1483.61485831983	33.1053648276369	1418.72834325766	1548.501373382	2923.8715414942	53.3166505721154	2819.37090637286	3028.37217661555	4407.48639981404	70.6846196306828	4268.9445453379	4546.02825429017	0.2340794115375	0.00278987990374451	0.228611246926161	0.239547576148839
2	PreTest, EntryTest, PCR 0D	1	1440.81669753535	32.4723659854713	1377.17086020383	1504.46253486687	2923.18386134988	53.3033359541417	2818.70932287976	3027.65839981999	4364.00055888523	70.2893847184995	4226.23336483697	4501.76775293348	0.200035484560435	0.0026443950846301	0.19485247019456	0.20521849892631
2	PreTest, EntryTest, PCR 0D	2	1044.97602532424	26.7661486029163	992.514374062519	1097.43767658595	2781.91565447746	51.7674626785558	2680.45142762749	2883.37988132743	3826.89167980169	66.2667423880426	3697.00886472113	3956.77449488226	0.161211634518464	0.00241122847392424	0.156485626709573	0.165937642327356
2	PreTest, EntryTest, PCR 0D	3	385.507605570784	14.8622226211644	356.377649233302	414.637561908267	1641.89015294611	37.4185135972033	1568.54986629559	1715.23043959662	2027.39775851689	45.5524991642896	1938.11486015488	2116.6806568789	0.104673517043742	0.00202179798091359	0.100710793001151	0.108636241086332
2	PreTest, EntryTest, PCR 0D	4	60.3613742990943	5.66929321689568	49.2495595939787	71.4731890042098	584.277066489505	18.5902009603105	547.840272607297	620.713860371714	644.638440788599	21.561227074766	602.378435722058	686.898445855141	0.0717196694170402	0.0017025597289236	0.06838265234835	0.0750566864857305
2	PreTest, EntryTest, PCR 0D	5	6.61793757931087	1.80080098341501	3.08836765181746	10.1475075068043	171.690824399026	7.19730127767433	157.584113894784	185.797534903267	178.308761978337	7.96504862700361	162.697266669409	193.920257287264	0.0644471900090221	0.00159600807650734	0.0613190141790677	0.0675753658389764
2	PreTest, EntryTest, PCR 0D	6	0.67695479510361	0.581118068010605	-0.462036618197176	1.8159462084044	44.9567515514101	2.60307593860678	39.8547227117408	50.0587803910794	45.6337063465137	2.84831966582549	40.0509998014958	51.2164128915317	0.0630851431169258	0.00159999927986972	0.0599491445283811	0.0662211417054704
2	PreTest, EntryTest, PCR 0D	7	0.0664202555580696	0.173627928887934	-0.273890485062282	0.406730996178421	11.0104657997104	0.867269978525752	9.31061664179993	12.7103149576209	11.0768860552685	0.933009625866365	9.2481871885704	12.9055849219666	0.0627765918519107	0.0015931665815662	0.059653985352041	0.0658991983517805
2	PreTest, EntryTest, PCR 0D	8	0.00784741986825915	0.0628637248525029	-0.115365480842647	0.131060320579165	2.62928733160116	0.291197709836607	2.05853982032142	3.20003484288091	2.63713475146942	0.318905919302687	2.01207914963616	3.26219035330269	0.0626981054186916	0.00159172647066192	0.0595783215361942	0.065817889301189
2	PreTest, EntryTest, PCR 0D	9	0.00120391696034371	0.0223307434148843	-0.0425643401328295	0.0449721740535169	0.628072782255031	0.106626511765847	0.419084819193972	0.837060745316091	0.629276699215375	0.118762998296756	0.396501222553732	0.862052175877018	0.0626454992919613	0.00159039132314644	0.0595283322985943	0.0657626662853283
2	PreTest, EntryTest, PCR 0D	10	0.000730683453626183	0.0165953128812744	-0.0317961297936716	0.033257496700924	0.152620374384317	0.04933694429723	0.0559199635617458	0.249320785206887	0.153351057837943	0.0609875689452068	0.0338154227053375	0.272886692970548	0.0617208879448247	0.00158433854802705	0.0586155843906917	0.0648261914989577
2	PreTest, EntryTest, PCR 0D	11	0	0	0	0	0.0370084796966907	0.011670802182631	0.0141337074187338	0.0598832519746475	0.0370084796966907	0.011670802182631	0.0141337074187338	0.0598832519746475	0.0539024881567345	0.00151408044324814	0.0509348904879682	0.0568700858255009
2	PreTest, EntryTest, PCR 0D	12	0	0	0	0	0.00890630772121696	0.0026154457536719	0.00378003404402004	0.0140325813984139	0.00890630772121696	0.0026154457536719	0.00378003404402004	0.0140325813984139	0.0338010446134049	0.00118605625107998	0.0314763743612881	0.0361257148655217
2	PreTest, EntryTest, PCR 0D	13	0	0	0	0	0.00194774196564399	0.00054726234340925	0.000875107772561863	0.00302037615872612	0.00194774196564399	0.00054726234340925	0.000875107772561863	0.00302037615872612	0.0134136633828422	0.000745080730405828	0.0119533051512468	0.0148740216144377
2	PreTest, EntryTest, PCR 0D	14	0	0	0	0	0.000358131706906227	0.000123235968875233	0.000116589207910771	0.000599674205901683	0.000358131706906227	0.000123235968875233	0.000116589207910771	0.000599674205901683	0.00346394566723594	0.000384010213037578	0.00271128564968228	0.00421660568478959
2	PreTest, EntryTest, PCR 0D	15	0	0	0	0	5.43828377514066e-05	3.17701115658619e-05	-7.88658091768268e-06	0.000116652256420496	5.43828377514066e-05	3.17701115658619e-05	-7.88658091768268e-06	0.000116652256420496	0.000636746864719352	0.000163040565295014	0.000317187356741125	0.000956306372697579
2	PreTest, EntryTest, PCR 0D	16	0	0	0	0	7.14074473654716e-06	9.50271414327261e-06	-1.14845749842672e-05	2.57660644573615e-05	7.14074473654716e-06	9.50271414327261e-06	-1.14845749842672e-05	2.57660644573615e-05	9.44112630496769e-05	6.42963735044981e-05	-3.16096290191394e-05	0.000220432155118493
2	PreTest, EntryTest, PCR 0D	17	0	0	0	0	8.64248778826564e-07	3.10750667514006e-06	-5.22646430444795e-06	6.95496186210108e-06	8.64248778826564e-07	3.10750667514006e-06	-5.22646430444795e-06	6.95496186210108e-06	1.14973855342401e-05	2.24328534475328e-05	-3.24710072229242e-05	5.54657782914044e-05
2	PreTest, EntryTest, PCR 0D	18	0	0	0	0	1.21741605845701e-07	1.1493661570574e-06	-2.1310160619868e-06	2.3744992736782e-06	1.21741605845701e-07	1.1493661570574e-06	-2.1310160619868e-06	2.3744992736782e-06	1.41168170318597e-06	7.76832815484661e-06	-1.38142414803134e-05	1.66376048866853e-05
2	PreTest, EntryTest, PCR 0D	19	0	0	0	0	2.67554354297568e-08	4.55924070584254e-07	-8.66855742915381e-07	9.20366613774894e-07	2.67554354297568e-08	4.55924070584254e-07	-8.66855742915381e-07	9.20366613774894e-07	2.64933711596412e-07	3.41178468374917e-06	-6.42216426855195e-06	6.95203169174478e-06
2	PreTest, EntryTest, PCR 0D	20	0	0	0	0	7.39346167499765e-09	1.78230529058668e-07	-3.41938375279992e-07	3.56725298629988e-07	7.39346167499765e-09	1.78230529058668e-07	-3.41938375279992e-07	3.56725298629988e-07	8.75944562777791e-08	1.95769123275791e-06	-3.74948035992773e-06	3.92466927248329e-06
2	PreTest, EntryTest, PCR 0D	21	0	0	0	0	2.00411934639741e-09	6.33758183742379e-08	-1.22212484667109e-07	1.26220723359904e-07	2.00411934639741e-09	6.33758183742379e-08	-1.22212484667109e-07	1.26220723359904e-07	4.38173692051529e-08	1.38562687764805e-06	-2.67201131098503e-06	2.75964604939533e-06
3	PreTest, EntryTest, Antigen	0	1648.14569021512	35.3345420682684	1578.88998776132	1717.40139266893	3249.23053163479	55.6857420411755	3140.08647723408	3358.37458603549	4897.37622184991	74.0981664990893	4752.1438155117	5042.60862818813	0.270961237686192	0.00290242134195687	0.265272491855957	0.276649983516428
3	PreTest, EntryTest, Antigen	1	1592.43187482974	34.4632454070705	1524.88391383188	1659.97983582759	3248.43860086192	55.6698608285199	3139.32567363802	3357.55152808581	4840.87047569165	73.5954101028497	4696.62347189007	4985.11747949324	0.23070473265245	0.00275566005859232	0.225303638937609	0.236105826367291
3	PreTest, EntryTest, Antigen	2	1139.77378062819	27.9386112176612	1085.01410264158	1194.53345861481	3065.70197814085	53.8732715860947	2960.1103658321	3171.2935904496	4205.47575876904	69.2862258134967	4069.67475617459	4341.2767613635	0.183265023636637	0.00251666904925728	0.178332352300093	0.188197694973181
3	PreTest, EntryTest, Antigen	3	413.282822339265	15.3749902401267	383.147841468617	443.417803209914	1781.92961056597	38.3813683051323	1706.70212868791	1857.15709244403	2195.21243290523	46.542297416038	2103.9895299698	2286.43533584067	0.117441102236638	0.00208862934947586	0.113347388711665	0.12153481576161
3	PreTest, EntryTest, Antigen	4	64.6237053218819	5.81368965917354	53.2288735899018	76.0185370538621	631.960359971299	19.564185062747	593.614557248315	670.306162694283	696.584065293181	22.5576459223878	652.371079285301	740.797051301061	0.0802324292458436	0.00179429114714045	0.0767156185974483	0.0837492398942389
3	PreTest, EntryTest, Antigen	5	7.14588565326665	1.89297024539641	3.43566397228968	10.8561073342436	185.446098061126	7.62221020605871	170.506566057251	200.385630065001	192.591983714392	8.41113520336885	176.106158715789	209.077808712995	0.0717769603536647	0.00166750641923573	0.0685086477719626	0.0750452729353667
3	PreTest, EntryTest, Antigen	6	0.741397836603052	0.595792166929354	-0.426354810578481	1.90915048378459	48.5419148447333	2.75491286200528	43.1422856352029	53.9415440542636	49.2833126813363	3.00098074299234	43.4013904250713	55.1652349376013	0.0701298964433929	0.00167454119164191	0.0668477957077747	0.073411997179011
3	PreTest, EntryTest, Antigen	7	0.0728428998241785	0.183758561535392	-0.287323880785189	0.433009680433546	11.8912989558237	0.913051033927907	10.101718929325	13.6808789823224	11.9641418556479	0.980534573741758	10.042294091114	13.8859896201817	0.0697623690095042	0.00166759315042733	0.0664938864346666	0.0730308515843417
3	PreTest, EntryTest, Antigen	8	0.00933743311908359	0.0670939967350803	-0.122166800481674	0.140841666719841	2.84170113741033	0.306062467259106	2.24181870158248	3.44158357323818	2.85103857052942	0.335563748074739	2.19333362430293	3.5087435167559	0.0696740600981439	0.00166678210044037	0.0664071671812807	0.072940953015007
3	PreTest, EntryTest, Antigen	9	0.0015331696662659	0.0246226697659954	-0.0467272630750851	0.0497936024076169	0.678690257579649	0.110419101853198	0.462268817947381	0.895111697211918	0.680223427245915	0.123999315745713	0.437184768384318	0.923262086107512	0.0696115002378182	0.00166617627288926	0.0663457947429552	0.0728772057326811
3	PreTest, EntryTest, Antigen	10	0.000730683453626183	0.0165953128812744	-0.0317961297936716	0.033257496700924	0.164602634410036	0.0495577052137344	0.0674695321911167	0.261735736628956	0.165333317863662	0.0611392159764206	0.045500454549878	0.285166181177447	0.0684539116237311	0.00165671439081486	0.065206751417734	0.0717010718297283
3	PreTest, EntryTest, Antigen	11	0	0	0	0	0.0399077096490195	0.0117250667901526	0.0169265787403203	0.0628888405577186	0.0399077096490195	0.0117250667901526	0.0169265787403203	0.0628888405577186	0.0593161015033245	0.00158797147805631	0.0562036774063341	0.0624285256003149
3	PreTest, EntryTest, Antigen	12	0	0	0	0	0.00958809102329366	0.00262916999659375	0.00443491782996991	0.0147412642166174	0.00958809102329366	0.00262916999659375	0.00443491782996991	0.0147412642166174	0.0367649480803076	0.00125619580146636	0.0343028043094335	0.0392270918511816
3	PreTest, EntryTest, Antigen	13	0	0	0	0	0.00209137165871736	0.000551387336198617	0.00101065247976807	0.00317209083766665	0.00209137165871736	0.000551387336198617	0.00101065247976807	0.00317209083766665	0.0144633324674643	0.000767525565689783	0.0129589823587123	0.0159676825762162
3	PreTest, EntryTest, Antigen	14	0	0	0	0	0.000383582753247224	0.000124427534437705	0.000139704785749323	0.000627460720745125	0.000383582753247224	0.000124427534437705	0.000139704785749323	0.000627460720745125	0.00371700421393466	0.000402882277126112	0.00292735495076748	0.00450665347710184
3	PreTest, EntryTest, Antigen	15	0	0	0	0	5.81086828384438e-05	3.19399062334221e-05	-4.4935333790635e-06	0.000120710899055951	5.81086828384438e-05	3.19399062334221e-05	-4.4935333790635e-06	0.000120710899055951	0.000682398168650545	0.000169480731045934	0.000350215935800514	0.00101458040150058
3	PreTest, EntryTest, Antigen	16	0	0	0	0	7.58528693553887e-06	9.57418653078713e-06	-1.11801186648039e-05	2.63506925358816e-05	7.58528693553887e-06	9.57418653078713e-06	-1.11801186648039e-05	2.63506925358816e-05	0.000100631057974089	6.67248689849089e-05	-3.01496852363324e-05	0.000231411801184511
3	PreTest, EntryTest, Antigen	17	0	0	0	0	9.09633395621356e-07	3.12119207158816e-06	-5.20790306469144e-06	7.02716985593415e-06	9.09633395621356e-07	3.12119207158816e-06	-5.20790306469144e-06	7.02716985593415e-06	1.22476551775008e-05	2.29426547070786e-05	-3.27199480483733e-05	5.7215258403375e-05
3	PreTest, EntryTest, Antigen	18	0	0	0	0	1.23998238943929e-07	1.15135728523526e-06	-2.13266204011717e-06	2.38065851800503e-06	1.23998238943929e-07	1.15135728523526e-06	-2.13266204011717e-06	2.38065851800503e-06	1.45558610721178e-06	7.8835451798087e-06	-1.39961624452133e-05	1.69073346596368e-05
3	PreTest, EntryTest, Antigen	19	0	0	0	0	2.67554354297568e-08	4.55924070584254e-07	-8.66855742915381e-07	9.20366613774894e-07	2.67554354297568e-08	4.55924070584254e-07	-8.66855742915381e-07	9.20366613774894e-07	2.64933711596412e-07	3.41178468374917e-06	-6.42216426855195e-06	6.95203169174478e-06
3	PreTest, EntryTest, Antigen	20	0	0	0	0	7.39346167499765e-09	1.78230529058668e-07	-3.41938375279992e-07	3.56725298629988e-07	7.39346167499765e-09	1.78230529058668e-07	-3.41938375279992e-07	3.56725298629988e-07	8.75944562777791e-08	1.95769123275791e-06	-3.74948035992773e-06	3.92466927248329e-06
3	PreTest, EntryTest, Antigen	21	0	0	0	0	2.00411934639741e-09	6.33758183742379e-08	-1.22212484667109e-07	1.26220723359904e-07	2.00411934639741e-09	6.33758183742379e-08	-1.22212484667109e-07	1.26220723359904e-07	4.38173692051529e-08	1.38562687764805e-06	-2.67201131098503e-06	2.75964604939533e-06
4	PreTest, EntryTest, PCR 1D	0	1842.15499010198	38.0357022583313	1767.60501367565	1916.70496652831	3632.70543700317	58.9627151924823	3517.1385152259	3748.27235878043	5474.86042710514	78.3433627777468	5321.30743606076	5628.41341814953	0.2517207644442	0.00283552069912893	0.246163143873907	0.257278385014492
4	PreTest, EntryTest, PCR 1D	1	1724.90326023606	36.2080394895477	1653.93550283655	1795.87101763557	3629.54081321447	58.8927974087345	3514.11093029335	3744.97069613559	5354.44407345053	77.7466683203609	5202.06060354263	5506.82754335844	0.221465385428314	0.00272265881837415	0.2161289741443	0.226801796712327
4	PreTest, EntryTest, PCR 1D	2	1165.81123911328	28.4009800701964	1110.14531817569	1221.47716005086	3246.83290542843	55.3431475301195	3138.36033626939	3355.30547458746	4412.6441445417	71.1035849810514	4273.28111797884	4552.00717110457	0.178632540556949	0.00253363740613331	0.173666611240928	0.18359846987297
4	PreTest, EntryTest, PCR 1D	3	407.559986761595	15.3653012029554	377.443996403802	437.675977119387	1817.09505671225	38.4184629800205	1741.79486927141	1892.39524415309	2224.65504347385	46.7017320171425	2133.11964872025	2316.19043822745	0.118258008703584	0.00214074973131151	0.114062139230214	0.122453878176955
4	PreTest, EntryTest, PCR 1D	4	63.305373912829	5.78405698594384	51.968622220379	74.6421256052789	638.107358077984	19.2065396436683	600.462540376394	675.752175779574	701.412731990813	22.2014857182406	657.897819983062	744.927643998565	0.0858216431392129	0.00185797022331407	0.0821800215015173	0.0894632647769084
4	PreTest, EntryTest, PCR 1D	5	6.99849158151459	1.86370674683895	3.34562635771023	10.6513568053189	186.30103750238	7.45270764004873	171.693730527884	200.908344476876	193.299529083895	8.2181344110707	177.191985638196	209.407072529593	0.0792244740555834	0.00176771686145146	0.0757597490071386	0.0826891991040283
4	PreTest, EntryTest, PCR 1D	6	0.729759893993963	0.593891317330753	-0.434267087974313	1.89378687596224	48.6336572755512	2.71195443800441	43.3182265770626	53.9490879740399	49.3634171695452	2.95969636137098	43.5624123012581	55.1644220378323	0.0781555688671436	0.00176692744461676	0.0746923910756948	0.0816187466585924
4	PreTest, EntryTest, PCR 1D	7	0.0718225566389589	0.180819678758234	-0.28258401372718	0.426229127005098	11.9010449160707	0.9057664003461	10.1257427713923	13.676347060749	11.9728674727096	0.973799488549288	10.064220475153	13.8815144702662	0.0779490380291417	0.00176340752485409	0.0744927592804277	0.0814053167778558
4	PreTest, EntryTest, PCR 1D	8	0.00933743311908359	0.0670939967350803	-0.122166800481674	0.140841666719841	2.84404699532263	0.304219238841466	2.24777728719335	3.4403167034519	2.85338442844171	0.333945753133679	2.1988507522997	3.50791810458372	0.0778984351416954	0.00176110015383918	0.0744466788401706	0.0813501914432202
4	PreTest, EntryTest, PCR 1D	9	0.0015331696662659	0.0246226697659954	-0.0467272630750851	0.0497936024076169	0.679610937483159	0.110277895688129	0.463466261934427	0.895755613031892	0.681144107149425	0.123868286064407	0.438362266463188	0.923925947835662	0.0777723879837009	0.00175970725209113	0.0743233617696023	0.0812214141977995
4	PreTest, EntryTest, PCR 1D	10	0.000730683453626183	0.0165953128812744	-0.0317961297936716	0.033257496700924	0.164938952579325	0.0495924388127045	0.0677377725064246	0.262140132652226	0.165669636032952	0.0611735959217386	0.0457693880263439	0.285569884039559	0.0755081382122836	0.0017449033563666	0.0720881276338051	0.0789281487907621
4	PreTest, EntryTest, PCR 1D	11	0	0	0	0	0.0399746202167445	0.0117339971821059	0.0169759857398169	0.062973254693672	0.0399746202167445	0.0117339971821059	0.0169759857398169	0.062973254693672	0.0631680836074477	0.00163785677023245	0.0599578843377921	0.0663782828771032
4	PreTest, EntryTest, PCR 1D	12	0	0	0	0	0.009569647696849	0.0026309789291311	0.00441292899575204	0.014726366397946	0.009569647696849	0.0026309789291311	0.00441292899575204	0.014726366397946	0.0377609107661584	0.00123937749330302	0.0353317308792844	0.0401900906530323
4	PreTest, EntryTest, PCR 1D	13	0	0	0	0	0.00207523105401035	0.000551685479182671	0.000993927514812316	0.00315653459320838	0.00207523105401035	0.000551685479182671	0.000993927514812316	0.00315653459320838	0.0145222823264881	0.000767176592460783	0.0130186162052649	0.0160259484477112
4	PreTest, EntryTest, PCR 1D	14	0	0	0	0	0.000378593555132055	0.000124292803311626	0.000134979660641268	0.000622207449622842	0.000378593555132055	0.000124292803311626	0.000134979660641268	0.000622207449622842	0.00368491181442143	0.000396824302987215	0.00290713618056649	0.00446268744827638
4	PreTest, EntryTest, PCR 1D	15	0	0	0	0	5.71628612892653e-05	3.19678606465894e-05	-5.49414557804991e-06	0.00011981986815658	5.71628612892653e-05	3.19678606465894e-05	-5.49414557804991e-06	0.00011981986815658	0.000671949781120565	0.000168089472682467	0.00034249441466293	0.0010014051475782
4	PreTest, EntryTest, PCR 1D	16	0	0	0	0	7.45314705687575e-06	9.56217746399338e-06	-1.12887207725513e-05	2.61950148863028e-05	7.45314705687575e-06	9.56217746399338e-06	-1.12887207725513e-05	2.61950148863028e-05	9.92176026744313e-05	6.61797691323349e-05	-3.04947448249451e-05	0.000228929950173808
4	PreTest, EntryTest, PCR 1D	17	0	0	0	0	8.88783877418946e-07	3.11654814100521e-06	-5.21965047895127e-06	6.99721823378916e-06	8.88783877418946e-07	3.11654814100521e-06	-5.21965047895127e-06	6.99721823378916e-06	1.18508753338298e-05	2.26830214189018e-05	-3.26078466472178e-05	5.63095973148773e-05
4	PreTest, EntryTest, PCR 1D	18	0	0	0	0	1.24061013153265e-07	1.15145860160267e-06	-2.13279784598796e-06	2.38091987229449e-06	1.24061013153265e-07	1.15145860160267e-06	-2.13279784598796e-06	2.38091987229449e-06	1.45607287822038e-06	7.88619305275254e-06	-1.40008655051746e-05	1.69130112616154e-05
4	PreTest, EntryTest, PCR 1D	19	0	0	0	0	2.67554354297568e-08	4.55924070584254e-07	-8.66855742915381e-07	9.20366613774894e-07	2.67554354297568e-08	4.55924070584254e-07	-8.66855742915381e-07	9.20366613774894e-07	2.64933711596412e-07	3.41178468374917e-06	-6.42216426855195e-06	6.95203169174478e-06
4	PreTest, EntryTest, PCR 1D	20	0	0	0	0	7.39346167499765e-09	1.78230529058668e-07	-3.41938375279992e-07	3.56725298629988e-07	7.39346167499765e-09	1.78230529058668e-07	-3.41938375279992e-07	3.56725298629988e-07	8.75944562777791e-08	1.95769123275791e-06	-3.74948035992773e-06	3.92466927248329e-06
4	PreTest, EntryTest, PCR 1D	21	0	0	0	0	2.00411934639741e-09	6.33758183742379e-08	-1.22212484667109e-07	1.26220723359904e-07	2.00411934639741e-09	6.33758183742379e-08	-1.22212484667109e-07	1.26220723359904e-07	4.38173692051529e-08	1.38562687764805e-06	-2.67201131098503e-06	2.75964604939533e-06
5	PreTest, EntryTest, PCR 2D	0	1966.58951601102	39.4836353498063	1889.2015907254	2043.97744129664	3889.47626083929	61.6807147428202	3768.58205994337	4010.37046173522	5856.06577685031	81.8065324255426	5695.72497329625	6016.40658040438	0.247381496019424	0.00292612997502155	0.241646281268382	0.253116710770466
5	PreTest, EntryTest, PCR 2D	1	1834.27296501121	37.3716232196753	1761.02458350064	1907.52134652177	3878.99280446903	61.6255524880459	3758.20672159246	3999.7788873456	5713.26576948024	80.6679781430007	5555.15653231996	5871.37500664052	0.223510672878142	0.00281509448994317	0.217993087677853	0.229028258078431
5	PreTest, EntryTest, PCR 2D	2	1236.79238995443	28.695724152114	1180.54877061629	1293.03600929257	3450.97719508695	57.4959560982566	3338.28512113437	3563.66926903954	4687.76958504138	73.0557989226272	4544.58021915303	4830.95895092973	0.183945072242713	0.00261378494832659	0.178822053743993	0.189068090741433
5	PreTest, EntryTest, PCR 2D	3	434.037068699484	15.8735895369936	402.924833206977	465.149304191991	1933.57207258558	39.6222312965635	1855.91249924432	2011.23164592685	2367.60914128507	48.2586570226788	2273.02217352062	2462.19610904952	0.123828902501424	0.00221882047889574	0.119480014362788	0.128177790640059
5	PreTest, EntryTest, PCR 2D	4	67.58789537038	5.96686681704917	55.8928364089636	79.2829543317964	679.290704773824	19.8697510502931	640.34599271525	718.235416832398	746.878600144204	22.9751041984139	701.847395915313	791.909804373095	0.0910494008372097	0.00194961280154304	0.0872281597461854	0.0948706419282341
5	PreTest, EntryTest, PCR 2D	5	7.48740507066728	2.00366226489452	3.56022703147403	11.4145831098605	198.366484196464	7.79171456418392	183.094723650664	213.638244742265	205.853889267131	8.68930240094626	188.822856561277	222.884921972986	0.0846795983067828	0.00185539814502351	0.0810430179425367	0.0883161786710289
5	PreTest, EntryTest, PCR 2D	6	0.7731820869457	0.602765313564252	-0.408237927640233	1.95460210153163	51.780725391773	2.78599659209882	46.3201720712593	57.2412787122867	52.5539074787187	3.04605847201573	46.5836328735679	58.5241820838695	0.0837568982280103	0.00184831331940366	0.0801342041219791	0.0873795923340414
5	PreTest, EntryTest, PCR 2D	7	0.0762001123943426	0.187641974884931	-0.291578158380122	0.443978383168808	12.6726083262008	0.924267068438997	10.8610448720604	14.4841717803413	12.7488084385952	0.994964520290246	10.7986779788263	14.6989388983641	0.0836049099326239	0.00184906982682349	0.0799807330720498	0.0872290867931979
5	PreTest, EntryTest, PCR 2D	8	0.00961777817340901	0.0688220892235096	-0.12527351670467	0.144509073051488	3.02915337554068	0.315580117010678	2.41061634619975	3.64769040488161	3.03877115371408	0.346933295167072	2.35878189518662	3.71876041224155	0.0835467611409458	0.00184987915901721	0.0799209979892721	0.0871725242926195
5	PreTest, EntryTest, PCR 2D	9	0.0015331696662659	0.0246226697659954	-0.0467272630750851	0.0497936024076169	0.723882929405995	0.113790666679423	0.500853222714325	0.946912636097664	0.725416099072261	0.128037046085925	0.474463488743848	0.976368709400673	0.0833109870510731	0.0018472155421283	0.0796904445885016	0.0869315295136445
5	PreTest, EntryTest, PCR 2D	10	0.000730683453626183	0.0165953128812744	-0.0317961297936716	0.033257496700924	0.17557834250088	0.0497498398643787	0.0780686563666974	0.273088028635062	0.176309025954506	0.0612817550032102	0.0561967861482139	0.296421265760798	0.0806091794454238	0.00182711644465681	0.0770280312138965	0.0841903276769511
5	PreTest, EntryTest, PCR 2D	11	0	0	0	0	0.0425587699492082	0.0117741911640604	0.0194813552676499	0.0656361846307665	0.0425587699492082	0.0117741911640604	0.0194813552676499	0.0656361846307665	0.0671904234266597	0.00166316539417579	0.0639306192540752	0.0704502275992443
5	PreTest, EntryTest, PCR 2D	12	0	0	0	0	0.0101884719980934	0.00264034947903317	0.00501338701918837	0.0153635569769984	0.0101884719980934	0.00264034947903317	0.00501338701918837	0.0153635569769984	0.0401315574457215	0.00127612540254516	0.037630351656733	0.04263276323471
5	PreTest, EntryTest, PCR 2D	13	0	0	0	0	0.00221029487159662	0.000554372674410234	0.00112372442975256	0.00329686531344067	0.00221029487159662	0.000554372674410234	0.00112372442975256	0.00329686531344067	0.0154500153343788	0.000805563776377845	0.0138711103326783	0.0170289203360794
5	PreTest, EntryTest, PCR 2D	14	0	0	0	0	0.000403429788992816	0.000124724652854909	0.000158969469397195	0.000647890108588438	0.000403429788992816	0.000124724652854909	0.000158969469397195	0.000647890108588438	0.00392465552226605	0.000410921190005563	0.00311924998985514	0.00473006105467695
5	PreTest, EntryTest, PCR 2D	15	0	0	0	0	6.0910495937464e-05	3.1868818902662e-05	-1.55238911175361e-06	0.000123373380986682	6.0910495937464e-05	3.1868818902662e-05	-1.55238911175361e-06	0.000123373380986682	0.000717824034511548	0.000172391220420436	0.000379937242487494	0.0010557108265356
5	PreTest, EntryTest, PCR 2D	16	0	0	0	0	7.90058586782015e-06	9.36218185228729e-06	-1.04492905626629e-05	2.62504622983032e-05	7.90058586782015e-06	9.36218185228729e-06	-1.04492905626629e-05	2.62504622983032e-05	0.000106135726827955	6.88934707354062e-05	-2.88954758134413e-05	0.000241166929469351
5	PreTest, EntryTest, PCR 2D	17	0	0	0	0	9.21236852718846e-07	2.9610048055844e-06	-4.88233256622658e-06	6.72480627166427e-06	9.21236852718846e-07	2.9610048055844e-06	-4.88233256622658e-06	6.72480627166427e-06	1.26441594938276e-05	2.32770702449133e-05	-3.29788981862024e-05	5.82672171738576e-05
5	PreTest, EntryTest, PCR 2D	18	0	0	0	0	1.18846790939174e-07	1.07398334405179e-06	-1.98616056340234e-06	2.22385414528068e-06	1.18846790939174e-07	1.07398334405179e-06	-1.98616056340234e-06	2.22385414528068e-06	1.54366230946132e-06	8.10977369355627e-06	-1.4351494129909e-05	1.74388187488316e-05
5	PreTest, EntryTest, PCR 2D	19	0	0	0	0	2.25351327566252e-08	4.20259541818536e-07	-8.01173569207706e-07	8.46243834720957e-07	2.25351327566252e-08	4.20259541818536e-07	-8.01173569207706e-07	8.46243834720957e-07	2.65077917566653e-07	3.41362820327569e-06	-6.4256333608537e-06	6.95578919598701e-06
5	PreTest, EntryTest, PCR 2D	20	0	0	0	0	5.18961075108103e-09	1.64109901431132e-07	-3.16465796053937e-07	3.26845017556099e-07	5.18961075108103e-09	1.64109901431132e-07	-3.16465796053937e-07	3.26845017556099e-07	4.38173692051529e-08	1.38562687764805e-06	-2.67201131098503e-06	2.75964604939533e-06
5	PreTest, EntryTest, PCR 2D	21	0	0	0	0	2.00411934639741e-09	6.33758183742379e-08	-1.22212484667109e-07	1.26220723359904e-07	2.00411934639741e-09	6.33758183742379e-08	-1.22212484667109e-07	1.26220723359904e-07	4.38173692051529e-08	1.38562687764805e-06	-2.67201131098503e-06	2.75964604939533e-06
6	PreTest, EntryTest, ExitTest, PCR 0D	0	1483.61485831983	33.1053648276369	1418.72834325766	1548.501373382	2923.8715414942	53.3166505721154	2819.37090637286	3028.37217661555	4407.48639981404	70.6846196306828	4268.9445453379	4546.02825429017	0.2340794115375	0.00278987990374451	0.228611246926161	0.239547576148839
6	PreTest, EntryTest, ExitTest, PCR 0D	1	530.919209365282	20.2397731395935	491.249254011679	570.589164718885	1053.0969750912	32.2382606016179	989.909984312032	1116.28396587037	1584.01618445649	42.455253777367	1500.80388705285	1667.22848186012	0.0842745238258526	0.00183790377663827	0.0806722324236416	0.0878768152280636
6	PreTest, EntryTest, ExitTest, PCR 0D	2	76.5269133762487	7.58851176124349	61.6534303242114	91.4003964282859	162.546021787718	12.74489884581	137.566020049931	187.526023525506	239.072935163967	16.5703339287212	206.595080663673	271.550789664261	0.0230845763532084	0.000969215968419079	0.021184913055107	0.0249842396513098
6	PreTest, EntryTest, ExitTest, PCR 0D	3	7.79645287997883	2.29374610426905	3.30071051561149	12.2921952443462	25.6500079150365	4.821101136256	16.2006496879748	35.0993661420983	33.4464607950154	6.03883731449142	21.6103396586122	45.2825819314185	0.00773956977149346	0.00055826695816911	0.006645366533482	0.00883377300950492
6	PreTest, EntryTest, ExitTest, PCR 0D	4	0.751502198206598	0.66572683703517	-0.553322402382336	2.05632679879553	8.91600498033752	2.11736806225082	4.76596357832592	13.0660463823491	9.66750717854412	2.40062535045136	4.96228149165945	14.3727328654288	0.00373198452374676	0.000408215471853414	0.00293188219891407	0.00453208684857945
6	PreTest, EntryTest, ExitTest, PCR 0D	5	0.0723925310131826	0.193387729331347	-0.306647418476258	0.451432480502623	4.1460936760327	0.913808356729041	2.35502929684378	5.93715805522162	4.21848620704588	0.968707873886824	2.31981877422771	6.11715363986406	0.00328335725758586	0.000367707935427026	0.00256264970414889	0.00400406481102283
6	PreTest, EntryTest, ExitTest, PCR 0D	6	0.00664634426105572	0.0637901037086236	-0.118382259007846	0.131674947529958	1.82603071518426	0.374507042115287	1.0919969126383	2.56006451773022	1.83267705944532	0.38837827959226	1.07145563144449	2.59389848744615	0.00490604747283139	0.000446438209608967	0.00403102858199782	0.00578106636366497
6	PreTest, EntryTest, ExitTest, PCR 0D	7	0	0	0	0	0.756598642228149	0.138273640558766	0.485582306732969	1.02761497772333	0.756598642228149	0.138273640558766	0.485582306732969	1.02761497772333	0.00828652139693583	0.000593633407120802	0.00712299991897906	0.0094500428748926
6	PreTest, EntryTest, ExitTest, PCR 0D	8	0	0	0	0	0.30604978609638	0.0480796816087559	0.211813610143219	0.400285962049542	0.30604978609638	0.0480796816087559	0.211813610143219	0.400285962049542	0.013863379370922	0.000793078397142859	0.012308945712522	0.015417813029322
6	PreTest, EntryTest, ExitTest, PCR 0D	9	0.000473233506717532	0.0149649574633599	-0.0288580831214679	0.029804550134903	0.11680498828813	0.0272735201852139	0.0633488887251105	0.170261087851149	0.117278221794847	0.0405675311010333	0.037765860836822	0.196790582752873	0.0214645028881435	0.000945018842742528	0.0196122659563681	0.0233167398199188
6	PreTest, EntryTest, ExitTest, PCR 0D	10	0	0	0	0	0.0424776565531791	0.00606797126520058	0.0305844328733859	0.0543708802329722	0.0424776565531791	0.00606797126520058	0.0305844328733859	0.0543708802329722	0.0297167380016458	0.00108428907007041	0.0275915314243077	0.0318419445789837
6	PreTest, EntryTest, ExitTest, PCR 0D	11	0	0	0	0	0.0144570224126856	0.00162308910973498	0.011275767757605	0.0176382770677662	0.0144570224126856	0.00162308910973498	0.011275767757605	0.0176382770677662	0.0322102570321905	0.00119590927219219	0.0298662748586938	0.0345542392056872
6	PreTest, EntryTest, ExitTest, PCR 0D	12	0	0	0	0	0.00452790105806844	0.00223801096159476	0.000141399573342704	0.00891440254279417	0.00452790105806844	0.00223801096159476	0.000141399573342704	0.00891440254279417	0.022533078705343	0.00099509907264628	0.0205826845229563	0.0244834728877297
6	PreTest, EntryTest, ExitTest, PCR 0D	13	0	0	0	0	0.00113659145473454	0.000189939609949833	0.000764309819232869	0.00150887309023621	0.00113659145473454	0.000189939609949833	0.000764309819232869	0.00150887309023621	0.00944192998325277	0.000638074888696127	0.00819130320140836	0.0106925567650972
6	PreTest, EntryTest, ExitTest, PCR 0D	14	0	0	0	0	0.000226349321264761	5.45010459862058e-05	0.000119527271131797	0.000333171371397724	0.000226349321264761	5.45010459862058e-05	0.000119527271131797	0.000333171371397724	0.00249707537196593	0.000332027540883659	0.00184630139183396	0.0031478493520979
6	PreTest, EntryTest, ExitTest, PCR 0D	15	0	0	0	0	3.61079481769996e-05	2.21515194479892e-05	-7.30902994105916e-06	7.95249262950583e-05	3.61079481769996e-05	2.21515194479892e-05	-7.30902994105916e-06	7.95249262950583e-05	0.000465236518807752	0.000139320689867085	0.000192167966668265	0.00073830507094724
6	PreTest, EntryTest, ExitTest, PCR 0D	16	0	0	0	0	4.84715583870989e-06	7.45553562157006e-06	-9.76569397956743e-06	1.94600056569872e-05	4.84715583870989e-06	7.45553562157006e-06	-9.76569397956743e-06	1.94600056569872e-05	6.94347152644025e-05	5.49683484934492e-05	-3.83032477827579e-05	0.000177172678311563
6	PreTest, EntryTest, ExitTest, PCR 0D	17	0	0	0	0	6.19061047517075e-07	2.72159596855929e-06	-4.71526705085913e-06	5.95338914589328e-06	6.19061047517075e-07	2.72159596855929e-06	-4.71526705085913e-06	5.95338914589328e-06	8.4576732431805e-06	1.95743247631209e-05	-2.99080032925365e-05	4.68233497788975e-05
6	PreTest, EntryTest, ExitTest, PCR 0D	18	0	0	0	0	9.66853136399151e-08	1.11927914160121e-06	-2.09710180389846e-06	2.29047243117829e-06	9.66853136399151e-08	1.11927914160121e-06	-2.09710180389846e-06	2.29047243117829e-06	9.70117820078082e-07	6.4715198887181e-06	-1.17140611618094e-05	1.36542968019656e-05
6	PreTest, EntryTest, ExitTest, PCR 0D	19	0	0	0	0	2.51067697676001e-08	4.53024864526391e-07	-8.62821964704126e-07	9.13035504239326e-07	2.51067697676001e-08	4.53024864526391e-07	-8.62821964704126e-07	9.13035504239326e-07	2.20422005017582e-07	3.11104886931865e-06	-5.87723377884696e-06	6.31807778888213e-06
6	PreTest, EntryTest, ExitTest, PCR 0D	20	0	0	0	0	7.39346167499765e-09	1.78230529058668e-07	-3.41938375279992e-07	3.56725298629988e-07	7.39346167499765e-09	1.78230529058668e-07	-3.41938375279992e-07	3.56725298629988e-07	8.75944562777791e-08	1.95769123275791e-06	-3.74948035992773e-06	3.92466927248329e-06
6	PreTest, EntryTest, ExitTest, PCR 0D	21	0	0	0	0	2.00411934639741e-09	6.33758183742379e-08	-1.22212484667109e-07	1.26220723359904e-07	2.00411934639741e-09	6.33758183742379e-08	-1.22212484667109e-07	1.26220723359904e-07	4.38173692051529e-08	1.38562687764805e-06	-2.67201131098503e-06	2.75964604939533e-06
7	PreTest, EntryTest, ExitTest, Antigen	0	1648.14569021512	35.3345420682684	1578.88998776132	1717.40139266893	3249.23053163479	55.6857420411755	3140.08647723408	3358.37458603549	4897.37622184991	74.0981664990893	4752.1438155117	5042.60862818813	0.270961237686192	0.00290242134195687	0.265272491855957	0.276649983516428
7	PreTest, EntryTest, ExitTest, Antigen	1	721.442653341541	23.4060128226239	675.566868209199	767.318438473884	1430.40456200589	37.1021108909068	1357.68442465972	1503.12469935207	2151.84721534744	49.2367498643662	2055.34318561328	2248.35124508159	0.120649341773362	0.00210718672412712	0.116519255794073	0.124779427752651
7	PreTest, EntryTest, ExitTest, Antigen	2	104.894906635439	9.15519483994287	86.9507247491507	122.839088521727	221.330580799947	15.1263827080218	191.682870692224	250.97829090767	326.225487435386	19.7522480617222	287.51108123441	364.939893636361	0.0353117709777565	0.00118504285673847	0.0329890869785491	0.0376344549769639
7	PreTest, EntryTest, ExitTest, Antigen	3	9.1936507792553	2.46919153619351	4.35403536831602	14.0332661901946	29.048994511019	5.05276488495291	19.1455753365113	38.9524136855267	38.2426452902743	6.30418827743412	25.8864362665034	50.5988543140452	0.0119482064520374	0.000673988552312084	0.0106271888895057	0.0132692240145691
7	PreTest, EntryTest, ExitTest, Antigen	4	0.81266641038685	0.69791725935339	-0.555251417945794	2.18058423871949	9.67270957195302	2.16017518047697	5.43876621821817	13.9066529256879	10.4853759823399	2.4480844414828	5.68713047703358	15.2836214876462	0.00537745540160561	0.000484749305069519	0.00442734676366935	0.00632756403954186
7	PreTest, EntryTest, ExitTest, Antigen	5	0.0784377255332061	0.207346173542197	-0.327960774609501	0.484836225675913	4.80335740924277	0.945624645064778	2.94993310491581	6.65678171356973	4.88179513477598	1.00478964811857	2.91240742446357	6.85118284508838	0.00444668910956465	0.000418216215051546	0.00362698532806362	0.00526639289106568
7	PreTest, EntryTest, ExitTest, Antigen	6	0.00706356209128197	0.0694909245344688	-0.129138649996277	0.143265774178841	2.29589495427182	0.392259487718933	1.52706635834271	3.06472355020092	2.3029585163631	0.403297486496077	1.51249544283079	3.09342158989541	0.00696019527037509	0.000534898723874897	0.00591179377158029	0.00800859676916989
7	PreTest, EntryTest, ExitTest, Antigen	7	0	0	0	0	1.02676379858956	0.149735750572031	0.733281727468382	1.32024586971074	1.02676379858956	0.149735750572031	0.733281727468382	1.32024586971074	0.0124579593427846	0.000719553114405079	0.0110476352385506	0.0138682834470186
7	PreTest, EntryTest, ExitTest, Antigen	8	0	0	0	0	0.437403867577454	0.0543886972769907	0.330802020914553	0.544005714240356	0.437403867577454	0.0543886972769907	0.330802020914553	0.544005714240356	0.0212788068665735	0.0009710209211524	0.0193756058611148	0.0231820078720322
7	PreTest, EntryTest, ExitTest, Antigen	9	0.000473233506717532	0.0149649574633599	-0.0288580831214679	0.029804550134903	0.171423737926437	0.0290535753317398	0.114478730276227	0.228368745576647	0.171896971433155	0.0419315221046312	0.0897111881080774	0.254082754758232	0.0324401749699368	0.00116756661667271	0.0301517444012583	0.0347286055386153
7	PreTest, EntryTest, ExitTest, Antigen	10	0	0	0	0	0.0619355566498294	0.00685261789873054	0.0485044255683175	0.0753666877313412	0.0619355566498294	0.00685261789873054	0.0485044255683175	0.0753666877313412	0.0428160549164872	0.00136454135217433	0.0401415538662255	0.0454905559667489
7	PreTest, EntryTest, ExitTest, Antigen	11	0	0	0	0	0.0206234922758541	0.00200249995706717	0.0166985923600024	0.0245483921917057	0.0206234922758541	0.00200249995706717	0.0166985923600024	0.0245483921917057	0.0440088146052897	0.00139485410608955	0.0412749005573542	0.0467427286532252
7	PreTest, EntryTest, ExitTest, Antigen	12	0	0	0	0	0.00620037276116521	0.00226786974840565	0.00175534805429014	0.0106453974680403	0.00620037276116521	0.00226786974840565	0.00175534805429014	0.0106453974680403	0.0295417085142355	0.00114170079256727	0.0273039749608037	0.0317794420676674
7	PreTest, EntryTest, ExitTest, Antigen	13	0	0	0	0	0.0015185592762338	0.000257359076527985	0.00101413548623895	0.00202298306622865	0.0015185592762338	0.000257359076527985	0.00101413548623895	0.00202298306622865	0.0120629214864908	0.000695189847797103	0.0107003493848085	0.0134254935881731
7	PreTest, EntryTest, ExitTest, Antigen	14	0	0	0	0	0.000296490671616877	6.32336496415251e-05	0.000172552718319488	0.000420428624914266	0.000296490671616877	6.32336496415251e-05	0.000172552718319488	0.000420428624914266	0.00315469211098116	0.000372708573360696	0.00242418330719419	0.00388520091476812
7	PreTest, EntryTest, ExitTest, Antigen	15	0	0	0	0	4.64783503252203e-05	2.34843176825553e-05	4.49087667411852e-07	9.25076129830287e-05	4.64783503252203e-05	2.34843176825553e-05	4.49087667411852e-07	9.25076129830287e-05	0.000582383954720041	0.000154667645344711	0.000279235369844409	0.000885532539595674
7	PreTest, EntryTest, ExitTest, Antigen	16	0	0	0	0	6.31419631612512e-06	8.57802198330576e-06	-1.04987267711542e-05	2.31271194034044e-05	6.31419631612512e-06	8.57802198330576e-06	-1.04987267711542e-05	2.31271194034044e-05	8.68902620455054e-05	6.18812321532261e-05	-3.43969529748177e-05	0.000208177477065829
7	PreTest, EntryTest, ExitTest, Antigen	17	0	0	0	0	6.88199846541783e-07	1.81958356893113e-06	-2.87818394856323e-06	4.2545836416468e-06	6.88199846541783e-07	1.81958356893113e-06	-2.87818394856323e-06	4.2545836416468e-06	1.07043031053004e-05	2.16870645259413e-05	-3.18023433655445e-05	5.32109495761453e-05
7	PreTest, EntryTest, ExitTest, Antigen	18	0	0	0	0	1.08612797134264e-07	1.12910700446087e-06	-2.10443693160904e-06	2.32166252587757e-06	1.08612797134264e-07	1.12910700446087e-06	-2.10443693160904e-06	2.32166252587757e-06	1.23369070301719e-06	7.27254227588236e-06	-1.30204921577122e-05	1.54878735637466e-05
7	PreTest, EntryTest, ExitTest, Antigen	19	0	0	0	0	2.67554354297568e-08	4.55924070584254e-07	-8.66855742915381e-07	9.20366613774894e-07	2.67554354297568e-08	4.55924070584254e-07	-8.66855742915381e-07	9.20366613774894e-07	2.64933711596412e-07	3.41178468374917e-06	-6.42216426855195e-06	6.95203169174478e-06
7	PreTest, EntryTest, ExitTest, Antigen	20	0	0	0	0	7.39346167499765e-09	1.78230529058668e-07	-3.41938375279992e-07	3.56725298629988e-07	7.39346167499765e-09	1.78230529058668e-07	-3.41938375279992e-07	3.56725298629988e-07	8.75944562777791e-08	1.95769123275791e-06	-3.74948035992773e-06	3.92466927248329e-06
7	PreTest, EntryTest, ExitTest, Antigen	21	0	0	0	0	2.00411934639741e-09	6.33758183742379e-08	-1.22212484667109e-07	1.26220723359904e-07	2.00411934639741e-09	6.33758183742379e-08	-1.22212484667109e-07	1.26220723359904e-07	4.38173692051529e-08	1.38562687764805e-06	-2.67201131098503e-06	2.75964604939533e-06
8	PreTest, EntryTest, ExitTest, PCR 1D	0	1842.15499010198	38.0357022583313	1767.60501367565	1916.70496652831	3632.70543700317	58.9627151924823	3517.1385152259	3748.27235878043	5474.86042710514	78.3433627777468	5321.30743606076	5628.41341814953	0.2517207644442	0.00283552069912893	0.246163143873907	0.257278385014492
8	PreTest, EntryTest, ExitTest, PCR 1D	1	1724.90326023606	36.2080394895477	1653.93550283655	1795.87101763557	3629.54081321447	58.8927974087345	3514.11093029335	3744.97069613559	5354.44407345053	77.7466683203609	5202.06060354263	5506.82754335844	0.221465385428314	0.00272265881837415	0.2161289741443	0.226801796712327
8	PreTest, EntryTest, ExitTest, PCR 1D	2	470.794822437365	18.261237537826	435.002796863226	506.586848011504	1105.55549698258	32.4420546673669	1041.96906983454	1169.14192413062	1576.35031941994	42.0045217012622	1494.02145688547	1658.67918195442	0.0639517781348278	0.00156653562065458	0.0608813683183448	0.0670221879513107
8	PreTest, EntryTest, ExitTest, PCR 1D	3	53.820680417637	5.72787957392457	42.5940364527448	65.0473243825292	159.369893311214	12.6013824640623	134.671183681652	184.068602940776	213.190573728851	15.666350714111	182.484526329193	243.896621128508	0.0111742948163136	0.000693022718107843	0.00981597028882223	0.012532619343805
8	PreTest, EntryTest, ExitTest, PCR 1D	4	3.92140178095063	1.45508126849034	1.06944249470956	6.77336106719169	16.7407762090717	3.65369536862645	9.57953328656387	23.9020191315795	20.6621779900223	4.4562612625863	11.9279059153532	29.3964500646915	0.00270720780985832	0.000342744794866486	0.00203542801192001	0.00337898760779663
8	PreTest, EntryTest, ExitTest, PCR 1D	5	0.275491394911712	0.391523487798147	-0.491894641172656	1.04287743099608	3.2778894711633	1.09540060659284	1.13090428224133	5.42487466008527	3.55338086607501	1.2822062934979	1.04025653081912	6.06650520133091	0.00229949621663774	0.000317749782666583	0.00167670664261124	0.00292228579066424
8	PreTest, EntryTest, ExitTest, PCR 1D	6	0.0211412393292083	0.0988964662239214	-0.172695834469678	0.214978313128094	1.19833280149902	0.367120305823528	0.478777002084909	1.91788860091314	1.21947404082823	0.412236353619131	0.411490787734735	2.02745729392173	0.00362308510863988	0.000388335295675413	0.00286194792911607	0.00438422228816369
8	PreTest, EntryTest, ExitTest, PCR 1D	7	0.00105215761204477	0.0198428505244134	-0.0378398294158054	0.039944144639895	0.480293704902999	0.11266456121532	0.259471164920972	0.701116244885027	0.481345862515044	0.120173355906474	0.245806084938355	0.716885640091733	0.00649313628303252	0.000515627493613485	0.00548250639555009	0.00750376617051495
8	PreTest, EntryTest, ExitTest, PCR 1D	8	0	0	0	0	0.196483066249463	0.0504393085625445	0.0976220214668764	0.295344111032051	0.196483066249463	0.0504393085625445	0.0976220214668764	0.295344111032051	0.0112649754274778	0.000695546929689492	0.0099017034452864	0.0126282474096692
8	PreTest, EntryTest, ExitTest, PCR 1D	9	0	0	0	0	0.0794472852910017	0.012719077300195	0.0545178937826196	0.104376676799384	0.0794472852910017	0.012719077300195	0.0545178937826196	0.104376676799384	0.0185776792941633	0.000933013561534804	0.0167489727135551	0.0204063858747715
8	PreTest, EntryTest, ExitTest, PCR 1D	10	0	0	0	0	0.0303501598604179	0.00382761094924603	0.0228480423998957	0.0378522773209401	0.0303501598604179	0.00382761094924603	0.0228480423998957	0.0378522773209401	0.0268185450255477	0.00109851379337477	0.0246654579905331	0.0289716320605622
8	PreTest, EntryTest, ExitTest, PCR 1D	11	0	0	0	0	0.0111188024880378	0.00166907983668086	0.00784740600814335	0.0143901989679323	0.0111188024880378	0.00166907983668086	0.00784740600814335	0.0143901989679323	0.0290263739118979	0.00111239395205786	0.0268460817658645	0.0312066660579313
8	PreTest, EntryTest, ExitTest, PCR 1D	12	0	0	0	0	0.00359637663192508	0.000441835696885277	0.00273037866602994	0.00446237459782023	0.00359637663192508	0.000441835696885277	0.00273037866602994	0.00446237459782023	0.020021798883316	0.000918737750701277	0.0182210728919415	0.0218225248746905
8	PreTest, EntryTest, ExitTest, PCR 1D	13	0	0	0	0	0.000964197949253703	0.000430016426182113	0.000121365753936762	0.00180703014457064	0.000964197949253703	0.000430016426182113	0.000121365753936762	0.00180703014457064	0.00834385749651035	0.000585336910322142	0.00719659715227895	0.00949111784074175
8	PreTest, EntryTest, ExitTest, PCR 1D	14	0	0	0	0	0.000194264603321692	5.28560828903519e-05	9.06666808566019e-05	0.000297862525786781	0.000194264603321692	5.28560828903519e-05	9.06666808566019e-05	0.000297862525786781	0.00221449085486369	0.000313972263306991	0.00159910521878199	0.0028298764909454
8	PreTest, EntryTest, ExitTest, PCR 1D	15	0	0	0	0	3.10572797772043e-05	1.50388708624395e-05	1.58109288682293e-06	6.05334666675856e-05	3.10572797772043e-05	1.50388708624395e-05	1.58109288682293e-06	6.05334666675856e-05	0.000416418906055258	0.000136071836881816	0.000149718105766899	0.000683119706343617
8	PreTest, EntryTest, ExitTest, PCR 1D	16	0	0	0	0	4.26799182388121e-06	7.16919541224445e-06	-9.78363118411792e-06	1.83196148318803e-05	4.26799182388121e-06	7.16919541224445e-06	-9.78363118411792e-06	1.83196148318803e-05	6.21599415773206e-05	5.20314476533672e-05	-3.98216958232791e-05	0.00016414157897792
8	PreTest, EntryTest, ExitTest, PCR 1D	17	0	0	0	0	5.33642500339045e-07	2.57004587168341e-06	-4.50364740816044e-06	5.57093240883853e-06	5.33642500339045e-07	2.57004587168341e-06	-4.50364740816044e-06	5.57093240883853e-06	7.62208700865967e-06	1.85553802283843e-05	-2.87464582389736e-05	4.39906322562929e-05
8	PreTest, EntryTest, ExitTest, PCR 1D	18	0	0	0	0	8.13099793665272e-08	1.02303830040879e-06	-1.9238450894347e-06	2.08646504816775e-06	8.13099793665272e-08	1.02303830040879e-06	-1.9238450894347e-06	2.08646504816775e-06	8.83084149890429e-07	6.18482875828249e-06	-1.12391802163432e-05	1.30053485161241e-05
8	PreTest, EntryTest, ExitTest, PCR 1D	19	0	0	0	0	2.51067697676001e-08	4.53024864526391e-07	-8.62821964704126e-07	9.13035504239326e-07	2.51067697676001e-08	4.53024864526391e-07	-8.62821964704126e-07	9.13035504239326e-07	2.20422005017582e-07	3.11104886931865e-06	-5.87723377884696e-06	6.31807778888213e-06
8	PreTest, EntryTest, ExitTest, PCR 1D	20	0	0	0	0	7.39346167499765e-09	1.78230529058668e-07	-3.41938375279992e-07	3.56725298629988e-07	7.39346167499765e-09	1.78230529058668e-07	-3.41938375279992e-07	3.56725298629988e-07	8.75944562777791e-08	1.95769123275791e-06	-3.74948035992773e-06	3.92466927248329e-06
8	PreTest, EntryTest, ExitTest, PCR 1D	21	0	0	0	0	2.00411934639741e-09	6.33758183742379e-08	-1.22212484667109e-07	1.26220723359904e-07	2.00411934639741e-09	6.33758183742379e-08	-1.22212484667109e-07	1.26220723359904e-07	4.38173692051529e-08	1.38562687764805e-06	-2.67201131098503e-06	2.75964604939533e-06
9	PreTest, EntryTest, ExitTest, PCR 2D	0	1966.58951601102	39.4836353498063	1889.2015907254	2043.97744129664	3889.47626083929	61.6807147428202	3768.58205994337	4010.37046173522	5856.06577685031	81.8065324255426	5695.72497329625	6016.40658040438	0.247381496019424	0.00292612997502155	0.241646281268382	0.253116710770466
9	PreTest, EntryTest, ExitTest, PCR 2D	1	1834.27296501121	37.3716232196753	1761.02458350064	1907.52134652177	3878.99280446903	61.6255524880459	3758.20672159246	3999.7788873456	5713.26576948024	80.6679781430007	5555.15653231996	5871.37500664052	0.223510672878142	0.00281509448994317	0.217993087677853	0.229028258078431
9	PreTest, EntryTest, ExitTest, PCR 2D	2	1236.79238995443	28.695724152114	1180.54877061629	1293.03600929257	3450.97719508695	57.4959560982566	3338.28512113437	3563.66926903954	4687.76958504138	73.0557989226272	4544.58021915303	4830.95895092973	0.183945072242713	0.00261378494832659	0.178822053743993	0.189068090741433
9	PreTest, EntryTest, ExitTest, PCR 2D	3	244.940800498672	12.2375005878645	220.955299346458	268.926301650887	878.541312214992	29.6216146837129	820.482947434915	936.599676995069	1123.48211271366	36.7449974572537	1051.46191769745	1195.50230772988	0.0471707859585416	0.00144790103620922	0.0443328999275715	0.0500086719895116
9	PreTest, EntryTest, ExitTest, PCR 2D	4	17.3607880482276	2.99932271544423	11.4821155259569	23.2394605704983	86.2962672479674	8.47097746627143	69.6931514140755	102.899383081859	103.657055296195	10.1479705098028	83.7670330969816	123.547077495409	0.00617159436331181	0.000537881366885758	0.00511734688421573	0.0072258418424079
9	PreTest, EntryTest, ExitTest, PCR 2D	5	1.03495381672028	0.716340634396251	-0.369073826696375	2.43898146013693	7.06214057214206	2.19525682516221	2.75943719482412	11.36484394946	8.09709438886234	2.57886767449297	3.04251374685612	13.1516750308686	0.00164902907243124	0.000271434921415574	0.00111701662645672	0.00218104151840577
9	PreTest, EntryTest, ExitTest, PCR 2D	6	0.0671447362992989	0.179833242007781	-0.285328418035952	0.41961789063455	1.01666618535559	0.547533295681084	-0.0564990741793352	2.08983144489051	1.08381092165489	0.637571231808199	-0.165828692689182	2.33345053599896	0.00216061374710119	0.000313295324696009	0.00154655491069701	0.00277467258350537
9	PreTest, EntryTest, ExitTest, PCR 2D	7	0.00802504629317412	0.0696900776361681	-0.128567505873715	0.144617598460064	0.323991782228243	0.196845749050188	-0.0618258859101263	0.709809450366612	0.332016828521417	0.228281044011183	-0.115414017740502	0.779447674783336	0.00389295311704415	0.000427061239197984	0.0030559130882161	0.0047299931458722
9	PreTest, EntryTest, ExitTest, PCR 2D	8	0.000818785819223638	0.0185210421621996	-0.0354824568186875	0.0371200284571348	0.120225459641914	0.0550989645164296	0.0122314891897121	0.228219430094116	0.121044245461138	0.0689401207275206	-0.0140783911648027	0.256166882087078	0.00703510520597006	0.000547249929443279	0.00596249534426123	0.00810771506767888
9	PreTest, EntryTest, ExitTest, PCR 2D	9	0	0	0	0	0.0510834694843285	0.0444792906360899	-0.0360959401624077	0.138262879131065	0.0510834694843285	0.0444792906360899	-0.0360959401624077	0.138262879131065	0.0121541506687435	0.000722065180734	0.0107389029145049	0.0135693984229822
9	PreTest, EntryTest, ExitTest, PCR 2D	10	0	0	0	0	0.0198623479581073	0.00270007999021261	0.0145701911772906	0.025154504738924	0.0198623479581073	0.00270007999021261	0.0145701911772906	0.025154504738924	0.0186328237964088	0.00089832001463087	0.0168721165677323	0.0203935310250853
9	PreTest, EntryTest, ExitTest, PCR 2D	11	0	0	0	0	0.00770615674900741	0.00106528481457794	0.00561819851243465	0.00979411498558018	0.00770615674900741	0.00106528481457794	0.00561819851243465	0.00979411498558018	0.0214023351951398	0.000929418293355866	0.0195806753401623	0.0232239950501173
9	PreTest, EntryTest, ExitTest, PCR 2D	12	0	0	0	0	0.00264751900593235	0.000338327277821964	0.0019843975414013	0.0033106404704634	0.00264751900593235	0.000338327277821964	0.0019843975414013	0.0033106404704634	0.0154774013206559	0.000829576176285171	0.0138514320151369	0.0171033706261748
9	PreTest, EntryTest, ExitTest, PCR 2D	13	0	0	0	0	0.000733128314552597	0.00012709929836081	0.000484013689765409	0.000982242939339786	0.000733128314552597	0.00012709929836081	0.000484013689765409	0.000982242939339786	0.00667542762903212	0.000551031139136256	0.00559540659632506	0.00775544866173918
9	PreTest, EntryTest, ExitTest, PCR 2D	14	0	0	0	0	0.000156170057517225	3.98335672495555e-05	7.80962657080964e-05	0.000234243849326354	0.000156170057517225	3.98335672495555e-05	7.80962657080964e-05	0.000234243849326354	0.00182878221122642	0.000292422519578466	0.00125563407285262	0.00240193034960021
9	PreTest, EntryTest, ExitTest, PCR 2D	15	0	0	0	0	2.67830064238577e-05	1.87929815251882e-05	-1.00512373655111e-05	6.36172502132265e-05	2.67830064238577e-05	1.87929815251882e-05	-1.00512373655111e-05	6.36172502132265e-05	0.000352736408635888	0.000122777015152595	0.000112093458936802	0.000593379358334974
9	PreTest, EntryTest, ExitTest, PCR 2D	16	0	0	0	0	3.72478496565488e-06	4.78426415963248e-06	-5.65237278722478e-06	1.31019427185345e-05	3.72478496565488e-06	4.78426415963248e-06	-5.65237278722478e-06	1.31019427185345e-05	5.53736261750065e-05	4.80544629267553e-05	-3.88131211614338e-05	0.000149560373511447
9	PreTest, EntryTest, ExitTest, PCR 2D	17	0	0	0	0	3.454094087648e-07	1.03207825124907e-06	-1.67746396368337e-06	2.36828278121297e-06	3.454094087648e-07	1.03207825124907e-06	-1.67746396368337e-06	2.36828278121297e-06	6.29977804720026e-06	1.66490998219046e-05	-2.63324576037327e-05	3.89320136981332e-05
9	PreTest, EntryTest, ExitTest, PCR 2D	18	0	0	0	0	5.91577378291547e-08	4.7565754061666e-07	-8.73131041779498e-07	9.91446517437807e-07	5.91577378291547e-08	4.7565754061666e-07	-8.73131041779498e-07	9.91446517437807e-07	9.68762054291192e-07	6.46252043431346e-06	-1.16977779969632e-05	1.36353021055456e-05
9	PreTest, EntryTest, ExitTest, PCR 2D	19	0	0	0	0	3.26164161331932e-09	7.29003843929128e-08	-1.3962311179679e-07	1.46146395023428e-07	3.26164161331932e-09	7.29003843929128e-08	-1.3962311179679e-07	1.46146395023428e-07	8.84329996216974e-08	1.97647617434741e-06	-3.78546030209922e-06	3.96232630134262e-06
9	PreTest, EntryTest, ExitTest, PCR 2D	20	0	0	0	0	0	0	0	0	0	0	0	0	0	0	0	0
9	PreTest, EntryTest, ExitTest, PCR 2D	21	0	0	0	0	0	0	0	0	0	0	0	0	0	0	0	0
10	PreTest, EntryTest, ExitTest, DailyTest, PCR 0D	0	1483.61485831983	33.1053648276369	1418.72834325766	1548.501373382	2923.8715414942	53.3166505721154	2819.37090637286	3028.37217661555	4407.48639981404	70.6846196306828	4268.9445453379	4546.02825429017	0.2340794115375	0.00278987990374451	0.228611246926161	0.239547576148839
10	PreTest, EntryTest, ExitTest, DailyTest, PCR 0D	1	273.445242747667	15.3401234320445	243.37860082086	303.511884674474	543.185623606517	22.6971559135832	498.699198015894	587.672049197141	816.630866354184	31.0416367058202	755.789258410777	877.472474297592	0.0472943295309059	0.00139785264996826	0.0445545383369681	0.0500341207248437
10	PreTest, EntryTest, ExitTest, DailyTest, PCR 0D	2	7.89547483357951	2.51489562009895	2.96627941818556	12.8246702489735	16.7384514213534	4.15189099291663	8.60074507523677	24.87615776747	24.6339262549329	5.59512870215131	13.6674739987163	35.6003785111494	0.0061566274307912	0.00053102196381349	0.00511582438171676	0.00719743047986564
10	PreTest, EntryTest, ExitTest, DailyTest, PCR 0D	3	0.0859878493799952	0.24944321317892	-0.402920848450688	0.574896547210678	0.209342403945131	0.440547253293651	-0.654130212510425	1.07281502040069	0.295330253325126	0.567117085968889	-0.816219235173896	1.40687974182415	0.00101408642816083	0.000211906219862329	0.000598750237230664	0.00142942261909099
10	PreTest, EntryTest, ExitTest, DailyTest, PCR 0D	4	0	0	0	0	9.84577292315787e-06	7.52129838985125e-06	-4.89597192095058e-06	2.45875177672663e-05	9.84577292315787e-06	7.52129838985125e-06	-4.89597192095058e-06	2.45875177672663e-05	0.000119581883342923	6.5650653479701e-05	-9.09339747729107e-06	0.000248257164163137
10	PreTest, EntryTest, ExitTest, DailyTest, PCR 0D	5	0	0	0	0	7.80892530009614e-07	2.52785412622529e-06	-4.17370155739195e-06	5.73548661741118e-06	7.80892530009614e-07	2.52785412622529e-06	-4.17370155739195e-06	5.73548661741118e-06	9.47522484016918e-06	1.98499570341234e-05	-2.94306909467127e-05	4.8381140627051e-05
10	PreTest, EntryTest, ExitTest, DailyTest, PCR 0D	6	0	0	0	0	4.34834820861389e-08	3.42445936574995e-07	-6.27710553600851e-07	7.14677517773128e-07	4.34834820861389e-08	3.42445936574995e-07	-6.27710553600851e-07	7.14677517773128e-07	7.49131994320762e-07	5.69946785689995e-06	-1.04218250052031e-05	1.19200889938447e-05
10	PreTest, EntryTest, ExitTest, DailyTest, PCR 0D	7	0	0	0	0	2.14134065844271e-09	6.77151372700364e-08	-1.30580328390829e-07	1.34863009707714e-07	2.14134065844271e-09	6.77151372700364e-08	-1.30580328390829e-07	1.34863009707714e-07	4.3950248318903e-08	1.3898288841772e-06	-2.68011436466841e-06	2.76801486130621e-06
10	PreTest, EntryTest, ExitTest, DailyTest, PCR 0D	8	0	0	0	0	0	0	0	0	0	0	0	0	0	0	0	0
10	PreTest, EntryTest, ExitTest, DailyTest, PCR 0D	9	0	0	0	0	0	0	0	0	0	0	0	0	0	0	0	0
10	PreTest, EntryTest, ExitTest, DailyTest, PCR 0D	10	0	0	0	0	0	0	0	0	0	0	0	0	0	0	0	0
10	PreTest, EntryTest, ExitTest, DailyTest, PCR 0D	11	0	0	0	0	0	0	0	0	0	0	0	0	0	0	0	0
10	PreTest, EntryTest, ExitTest, DailyTest, PCR 0D	12	0	0	0	0	0	0	0	0	0	0	0	0	0	0	0	0
10	PreTest, EntryTest, ExitTest, DailyTest, PCR 0D	13	0	0	0	0	0	0	0	0	0	0	0	0	0	0	0	0
10	PreTest, EntryTest, ExitTest, DailyTest, PCR 0D	14	0	0	0	0	0	0	0	0	0	0	0	0	0	0	0	0
10	PreTest, EntryTest, ExitTest, DailyTest, PCR 0D	15	0	0	0	0	0	0	0	0	0	0	0	0	0	0	0	0
10	PreTest, EntryTest, ExitTest, DailyTest, PCR 0D	16	0	0	0	0	0	0	0	0	0	0	0	0	0	0	0	0
10	PreTest, EntryTest, ExitTest, DailyTest, PCR 0D	17	0	0	0	0	0	0	0	0	0	0	0	0	0	0	0	0
10	PreTest, EntryTest, ExitTest, DailyTest, PCR 0D	18	0	0	0	0	0	0	0	0	0	0	0	0	0	0	0	0
10	PreTest, EntryTest, ExitTest, DailyTest, PCR 0D	19	0	0	0	0	0	0	0	0	0	0	0	0	0	0	0	0
10	PreTest, EntryTest, ExitTest, DailyTest, PCR 0D	20	0	0	0	0	0	0	0	0	0	0	0	0	0	0	0	0
10	PreTest, EntryTest, ExitTest, DailyTest, PCR 0D	21	0	0	0	0	0	0	0	0	0	0	0	0	0	0	0	0
11	PreTest, EntryTest, ExitTest, DailyTest, Antigen	0	1648.14569021512	35.3345420682684	1578.88998776132	1717.40139266893	3249.23053163479	55.6857420411755	3140.08647723408	3358.37458603549	4897.37622184991	74.0981664990893	4752.1438155117	5042.60862818813	0.270961237686192	0.00290242134195687	0.265272491855957	0.276649983516428
11	PreTest, EntryTest, ExitTest, DailyTest, Antigen	1	448.706843768056	18.5962570261763	412.258179996751	485.155507539362	892.169651668496	29.868998742295	833.626414133597	950.712889203394	1340.87649543655	39.7713816896232	1262.92458732489	1418.82840354821	0.0820602506282817	0.00180356685940968	0.0785252595838387	0.0855952416727246
11	PreTest, EntryTest, ExitTest, DailyTest, Antigen	2	17.8529242304345	3.76237507014857	10.4786690929433	25.2271793679257	37.7217209285134	6.18885358906084	25.5915678939541	49.8518739630726	55.5746451589479	8.13642155639594	39.6272589084119	71.5220314094839	0.0148158181871077	0.000793117331858052	0.013261308216666	0.0163703281575495
11	PreTest, EntryTest, ExitTest, DailyTest, Antigen	3	0.265167643516008	0.442602159206574	-0.602332588528877	1.13266787556089	0.570861283893052	0.740196907652905	-0.879924655106641	2.02164722289274	0.836028927409059	0.967413461104625	-1.060101456356	2.73215931117412	0.00325967673291818	0.000374477884731435	0.00252570007884457	0.0039936533869918
11	PreTest, EntryTest, ExitTest, DailyTest, Antigen	4	0.00241362617364349	0.0468567395101614	-0.0894255832662728	0.0942528356135598	0.0116900923362033	0.11550265699292	-0.21469511536992	0.238075300042326	0.0141037185098468	0.128333135565317	-0.237429227198174	0.265636664217868	0.000514809595424801	0.000150019592177463	0.000220771194756974	0.000808847996092628
11	PreTest, EntryTest, ExitTest, DailyTest, Antigen	5	0	0	0	0	3.79964942026772e-06	5.00014830410283e-06	-6.00064125577381e-06	1.35999400963093e-05	3.79964942026772e-06	5.00014830410283e-06	-6.00064125577381e-06	1.35999400963093e-05	5.10123265108638e-05	4.6778725982031e-05	-4.0673976413917e-05	0.000142698629435645
11	PreTest, EntryTest, ExitTest, DailyTest, Antigen	6	0	0	0	0	1.9084084503778e-07	8.08403639663772e-07	-1.39363028870321e-06	1.77531197877877e-06	1.9084084503778e-07	8.08403639663772e-07	-1.39363028870321e-06	1.77531197877877e-06	3.17057097261558e-06	1.17234631086181e-05	-1.98074167202758e-05	2.6148558665507e-05
11	PreTest, EntryTest, ExitTest, DailyTest, Antigen	7	0	0	0	0	3.10843962254147e-09	9.82974917634513e-08	-1.89554644233823e-07	1.95771523478906e-07	3.10843962254147e-09	9.82974917634513e-08	-1.89554644233823e-07	1.95771523478906e-07	4.37541019470575e-08	1.3836261912791e-06	-2.66815323295998e-06	2.75566143685409e-06
11	PreTest, EntryTest, ExitTest, DailyTest, Antigen	8	0	0	0	0	0	0	0	0	0	0	0	0	0	0	0	0
11	PreTest, EntryTest, ExitTest, DailyTest, Antigen	9	0	0	0	0	0	0	0	0	0	0	0	0	0	0	0	0
11	PreTest, EntryTest, ExitTest, DailyTest, Antigen	10	0	0	0	0	0	0	0	0	0	0	0	0	0	0	0	0
11	PreTest, EntryTest, ExitTest, DailyTest, Antigen	11	0	0	0	0	0	0	0	0	0	0	0	0	0	0	0	0
11	PreTest, EntryTest, ExitTest, DailyTest, Antigen	12	0	0	0	0	0	0	0	0	0	0	0	0	0	0	0	0
11	PreTest, EntryTest, ExitTest, DailyTest, Antigen	13	0	0	0	0	0	0	0	0	0	0	0	0	0	0	0	0
11	PreTest, EntryTest, ExitTest, DailyTest, Antigen	14	0	0	0	0	0	0	0	0	0	0	0	0	0	0	0	0
11	PreTest, EntryTest, ExitTest, DailyTest, Antigen	15	0	0	0	0	0	0	0	0	0	0	0	0	0	0	0	0
11	PreTest, EntryTest, ExitTest, DailyTest, Antigen	16	0	0	0	0	0	0	0	0	0	0	0	0	0	0	0	0
11	PreTest, EntryTest, ExitTest, DailyTest, Antigen	17	0	0	0	0	0	0	0	0	0	0	0	0	0	0	0	0
11	PreTest, EntryTest, ExitTest, DailyTest, Antigen	18	0	0	0	0	0	0	0	0	0	0	0	0	0	0	0	0
11	PreTest, EntryTest, ExitTest, DailyTest, Antigen	19	0	0	0	0	0	0	0	0	0	0	0	0	0	0	0	0
11	PreTest, EntryTest, ExitTest, DailyTest, Antigen	20	0	0	0	0	0	0	0	0	0	0	0	0	0	0	0	0
11	PreTest, EntryTest, ExitTest, DailyTest, Antigen	21	0	0	0	0	0	0	0	0	0	0	0	0	0	0	0	0
12	PreTest, EntryTest, ExitTest, DailyTest, PCR 1D	0	1842.15499010198	38.0357022583313	1767.60501367565	1916.70496652831	3632.70543700317	58.9627151924823	3517.1385152259	3748.27235878043	5474.86042710514	78.3433627777468	5321.30743606076	5628.41341814953	0.2517207644442	0.00283552069912893	0.246163143873907	0.257278385014492
12	PreTest, EntryTest, ExitTest, DailyTest, PCR 1D	1	1724.90326023606	36.2080394895477	1653.93550283655	1795.87101763557	3629.54081321447	58.8927974087345	3514.11093029335	3744.97069613559	5354.44407345053	77.7466683203609	5202.06060354263	5506.82754335844	0.221465385428314	0.00272265881837415	0.2161289741443	0.226801796712327
12	PreTest, EntryTest, ExitTest, DailyTest, PCR 1D	2	252.30676048948	14.1932673516526	224.487956480241	280.12556449872	554.79353631102	22.8759317517959	509.9567100775	599.63036254454	807.100296800501	30.7016388511645	746.925084652218	867.275508948783	0.0330072939884555	0.00116565609031406	0.0307226080514399	0.035291979925471
12	PreTest, EntryTest, ExitTest, DailyTest, PCR 1D	3	6.6877258122538	2.17398570055076	2.4267138391743	10.9487377853333	16.9598110363579	4.15670893130659	8.81266153099696	25.1069605417188	23.6475368486117	5.36909189872652	13.1241167271077	34.1709569701156	0.00158517102057312	0.000264445196200283	0.00106685843602057	0.00210348360512568
12	PreTest, EntryTest, ExitTest, DailyTest, PCR 1D	4	0.0742766031400405	0.221726810660711	-0.360307945754954	0.508861152035035	0.215073051341216	0.446383275874826	-0.659838169373443	1.08998427205588	0.289349654481257	0.557044982672031	-0.802458511555924	1.38115782051844	9.23035101653005e-05	6.1656612093515e-05	-2.85434495379889e-05	0.00021315046986859
12	PreTest, EntryTest, ExitTest, DailyTest, PCR 1D	5	0	0	0	0	4.02630666848214e-07	1.25198799663847e-06	-2.05126580656318e-06	2.85652714025961e-06	4.02630666848214e-07	1.25198799663847e-06	-2.05126580656318e-06	2.85652714025961e-06	5.50976815655066e-06	1.49828292795271e-05	-2.38565772313224e-05	3.48761135444237e-05
12	PreTest, EntryTest, ExitTest, DailyTest, PCR 1D	6	0	0	0	0	5.65237693564369e-08	6.00203919262956e-07	-1.11987591239896e-06	1.23292345111183e-06	5.65237693564369e-08	6.00203919262956e-07	-1.11987591239896e-06	1.23292345111183e-06	6.16009963576448e-07	5.17233418213532e-06	-9.52176503340879e-06	1.07537849605617e-05
12	PreTest, EntryTest, ExitTest, DailyTest, PCR 1D	7	0	0	0	0	0	0	0	0	0	0	0	0	0	0	0	0
12	PreTest, EntryTest, ExitTest, DailyTest, PCR 1D	8	0	0	0	0	0	0	0	0	0	0	0	0	0	0	0	0
12	PreTest, EntryTest, ExitTest, DailyTest, PCR 1D	9	0	0	0	0	0	0	0	0	0	0	0	0	0	0	0	0
12	PreTest, EntryTest, ExitTest, DailyTest, PCR 1D	10	0	0	0	0	0	0	0	0	0	0	0	0	0	0	0	0
12	PreTest, EntryTest, ExitTest, DailyTest, PCR 1D	11	0	0	0	0	0	0	0	0	0	0	0	0	0	0	0	0
12	PreTest, EntryTest, ExitTest, DailyTest, PCR 1D	12	0	0	0	0	0	0	0	0	0	0	0	0	0	0	0	0
12	PreTest, EntryTest, ExitTest, DailyTest, PCR 1D	13	0	0	0	0	0	0	0	0	0	0	0	0	0	0	0	0
12	PreTest, EntryTest, ExitTest, DailyTest, PCR 1D	14	0	0	0	0	0	0	0	0	0	0	0	0	0	0	0	0
12	PreTest, EntryTest, ExitTest, DailyTest, PCR 1D	15	0	0	0	0	0	0	0	0	0	0	0	0	0	0	0	0
12	PreTest, EntryTest, ExitTest, DailyTest, PCR 1D	16	0	0	0	0	0	0	0	0	0	0	0	0	0	0	0	0
12	PreTest, EntryTest, ExitTest, DailyTest, PCR 1D	17	0	0	0	0	0	0	0	0	0	0	0	0	0	0	0	0
12	PreTest, EntryTest, ExitTest, DailyTest, PCR 1D	18	0	0	0	0	0	0	0	0	0	0	0	0	0	0	0	0
12	PreTest, EntryTest, ExitTest, DailyTest, PCR 1D	19	0	0	0	0	0	0	0	0	0	0	0	0	0	0	0	0
12	PreTest, EntryTest, ExitTest, DailyTest, PCR 1D	20	0	0	0	0	0	0	0	0	0	0	0	0	0	0	0	0
12	PreTest, EntryTest, ExitTest, DailyTest, PCR 1D	21	0	0	0	0	0	0	0	0	0	0	0	0	0	0	0	0
13	PreTest, EntryTest, ExitTest, DailyTest, PCR 2D	0	1966.58951601102	39.4836353498063	1889.2015907254	2043.97744129664	3889.47626083929	61.6807147428202	3768.58205994337	4010.37046173522	5856.06577685031	81.8065324255426	5695.72497329625	6016.40658040438	0.247381496019424	0.00292612997502155	0.241646281268382	0.253116710770466
13	PreTest, EntryTest, ExitTest, DailyTest, PCR 2D	1	1834.27296501121	37.3716232196753	1761.02458350064	1907.52134652177	3878.99280446903	61.6255524880459	3758.20672159246	3999.7788873456	5713.26576948024	80.6679781430007	5555.15653231996	5871.37500664052	0.223510672878142	0.00281509448994317	0.217993087677853	0.229028258078431
13	PreTest, EntryTest, ExitTest, DailyTest, PCR 2D	2	1236.79238995443	28.695724152114	1180.54877061629	1293.03600929257	3450.97719508695	57.4959560982566	3338.28512113437	3563.66926903954	4687.76958504138	73.0557989226272	4544.58021915303	4830.95895092973	0.183945072242713	0.00261378494832659	0.178822053743993	0.189068090741433
13	PreTest, EntryTest, ExitTest, DailyTest, PCR 2D	3	150.214677070427	9.81749199520134	130.972392759832	169.456961381021	499.346295169744	22.5118979923072	455.222975104822	543.469615234666	649.560972240171	28.2704907822551	594.150810306951	704.971134173391	0.0256621932332142	0.00107770566861615	0.0235498901227266	0.0277744963437019
13	PreTest, EntryTest, ExitTest, DailyTest, PCR 2D	4	3.42415613129096	1.41955339422102	0.641831478617769	6.20648078396415	12.668054304914	3.41122054789769	5.98206203103456	19.3540465787935	16.092210436205	4.26095362579415	7.74074132964847	24.4436795427615	0.000754983209804134	0.000183541189354787	0.000395242478668752	0.00111472394093952
13	PreTest, EntryTest, ExitTest, DailyTest, PCR 2D	5	0.0467215897012381	0.171423846128018	-0.289269148709677	0.382712328112153	0.168352765755263	0.385428068033749	-0.587086247590885	0.923791779101411	0.215074355456501	0.483395691840833	-0.732381200551532	1.16252991146453	1.37048163908649e-05	2.53476315315621e-05	-3.59765414109969e-05	6.33861741927267e-05
13	PreTest, EntryTest, ExitTest, DailyTest, PCR 2D	6	0.000372800842078223	0.0117889977459592	-0.0227336347400019	0.0234792364241583	0.000675634669001694	0.0213652189625955	-0.0412001944976855	0.0425514638356889	0.00104843551107992	0.0331542167084124	-0.0639338292374084	0.0660307002595682	1.76468060563048e-07	2.78601291540323e-06	-5.28411725362729e-06	5.63705337475338e-06
13	PreTest, EntryTest, ExitTest, DailyTest, PCR 2D	7	0	0	0	0	0	0	0	0	0	0	0	0	0	0	0	0
13	PreTest, EntryTest, ExitTest, DailyTest, PCR 2D	8	0	0	0	0	0	0	0	0	0	0	0	0	0	0	0	0
13	PreTest, EntryTest, ExitTest, DailyTest, PCR 2D	9	0	0	0	0	0	0	0	0	0	0	0	0	0	0	0	0
13	PreTest, EntryTest, ExitTest, DailyTest, PCR 2D	10	0	0	0	0	0	0	0	0	0	0	0	0	0	0	0	0
13	PreTest, EntryTest, ExitTest, DailyTest, PCR 2D	11	0	0	0	0	0	0	0	0	0	0	0	0	0	0	0	0
13	PreTest, EntryTest, ExitTest, DailyTest, PCR 2D	12	0	0	0	0	0	0	0	0	0	0	0	0	0	0	0	0
13	PreTest, EntryTest, ExitTest, DailyTest, PCR 2D	13	0	0	0	0	0	0	0	0	0	0	0	0	0	0	0	0
13	PreTest, EntryTest, ExitTest, DailyTest, PCR 2D	14	0	0	0	0	0	0	0	0	0	0	0	0	0	0	0	0
13	PreTest, EntryTest, ExitTest, DailyTest, PCR 2D	15	0	0	0	0	0	0	0	0	0	0	0	0	0	0	0	0
13	PreTest, EntryTest, ExitTest, DailyTest, PCR 2D	16	0	0	0	0	0	0	0	0	0	0	0	0	0	0	0	0
13	PreTest, EntryTest, ExitTest, DailyTest, PCR 2D	17	0	0	0	0	0	0	0	0	0	0	0	0	0	0	0	0
13	PreTest, EntryTest, ExitTest, DailyTest, PCR 2D	18	0	0	0	0	0	0	0	0	0	0	0	0	0	0	0	0
13	PreTest, EntryTest, ExitTest, DailyTest, PCR 2D	19	0	0	0	0	0	0	0	0	0	0	0	0	0	0	0	0
13	PreTest, EntryTest, ExitTest, DailyTest, PCR 2D	20	0	0	0	0	0	0	0	0	0	0	0	0	0	0	0	0
13	PreTest, EntryTest, ExitTest, DailyTest, PCR 2D	21	0	0	0	0	0	0	0	0	0	0	0	0	0	0	0	0
14	PreTest, EntryTest, ExitTest, TestEvery2Days, PCR 0D	0	1483.61485831983	33.1053648276369	1418.72834325766	1548.501373382	2923.8715414942	53.3166505721154	2819.37090637286	3028.37217661555	4407.48639981404	70.6846196306828	4268.9445453379	4546.02825429017	0.2340794115375	0.00278987990374451	0.228611246926161	0.239547576148839
14	PreTest, EntryTest, ExitTest, TestEvery2Days, PCR 0D	1	273.445242747667	15.3401234320445	243.37860082086	303.511884674474	543.185623606517	22.6971559135832	498.699198015894	587.672049197141	816.630866354184	31.0416367058202	755.789258410777	877.472474297592	0.0472943295309059	0.00139785264996826	0.0445545383369681	0.0500341207248437
14	PreTest, EntryTest, ExitTest, TestEvery2Days, PCR 0D	2	46.5463451007309	6.03840591708793	34.7110695032386	58.3816206982233	96.662260531915	9.81485593308539	77.4251429030676	115.899378160762	143.208605632646	12.9406738284873	117.844884928811	168.572326336481	0.0128182282632139	0.000727295268739022	0.0113927295364854	0.0142437269899424
14	PreTest, EntryTest, ExitTest, TestEvery2Days, PCR 0D	3	0.279803229932735	0.46490116237506	-0.631403048322382	1.19100950818785	0.642617944754362	0.777339007619647	-0.880966510180147	2.16620239968887	0.922421174687097	1.01353417955902	-1.06410581724858	2.90894816662277	0.0017647826556445	0.000279384296937269	0.00121718943364745	0.00231237587764154
14	PreTest, EntryTest, ExitTest, TestEvery2Days, PCR 0D	4	0.0500213936037767	0.183514175137984	-0.309666389666673	0.409709176874226	0.177252890645658	0.408056102586932	-0.622537070424729	0.977042851716044	0.227274284249434	0.500421595452212	-0.753552042836901	1.20810061133577	0.000384512274679887	0.000128528167564345	0.000132597066253771	0.000636427483106003
14	PreTest, EntryTest, ExitTest, TestEvery2Days, PCR 0D	5	0.000387319006938858	0.0122481024300135	-0.0236189617558877	0.0243935997697654	0.000937855030987165	0.0250427890641969	-0.0481460115348387	0.050021721596813	0.00132517403792602	0.0372634256962462	-0.0717111403267165	0.0743614884025685	4.35330387351253e-05	4.37325342890256e-05	-4.21827284713649e-05	0.000129248805941616
14	PreTest, EntryTest, ExitTest, TestEvery2Days, PCR 0D	6	0	0	0	0	0.000388842521454183	0.00513044375877757	-0.00966682724574984	0.0104445122886582	0.000388842521454183	0.00513044375877757	-0.00966682724574984	0.0104445122886582	5.77259820244308e-06	1.52635578029631e-05	-2.41439750913647e-05	3.56891714962508e-05
14	PreTest, EntryTest, ExitTest, TestEvery2Days, PCR 0D	7	0	0	0	0	5.44150027221123e-06	7.40484327614867e-05	-0.000139693427940303	0.000150576428484725	5.44150027221123e-06	7.40484327614867e-05	-0.000139693427940303	0.000150576428484725	7.49819917681753e-07	6.350408977095e-06	-1.16969816774245e-05	1.3196621512788e-05
14	PreTest, EntryTest, ExitTest, TestEvery2Days, PCR 0D	8	0	0	0	0	9.38605783066586e-06	0.00019692548921608	-0.000376587901032851	0.000395360016694182	9.38605783066586e-06	0.00019692548921608	-0.000376587901032851	0.000395360016694182	4.85408173298401e-07	5.01305648729975e-06	-9.34018254180911e-06	1.03109988884059e-05
14	PreTest, EntryTest, ExitTest, TestEvery2Days, PCR 0D	9	0	0	0	0	1.62029940350711e-07	2.53379225344888e-06	-4.80420287640909e-06	5.12826275711052e-06	1.62029940350711e-07	2.53379225344888e-06	-4.80420287640909e-06	5.12826275711052e-06	2.64751169009856e-07	3.40942530160283e-06	-6.41772242213169e-06	6.94722476015141e-06
14	PreTest, EntryTest, ExitTest, TestEvery2Days, PCR 0D	10	0	0	0	0	4.12617484638112e-08	5.94800693148055e-07	-1.12454761010638e-06	1.207071107034e-06	4.12617484638112e-08	5.94800693148055e-07	-1.12454761010638e-06	1.207071107034e-06	3.09316553394768e-07	4.18461210917592e-06	-7.89252318059003e-06	8.51115628737956e-06
14	PreTest, EntryTest, ExitTest, TestEvery2Days, PCR 0D	11	0	0	0	0	4.71454609333743e-09	1.06013684098794e-07	-2.030722747403e-07	2.12501366926974e-07	4.71454609333743e-09	1.06013684098794e-07	-2.030722747403e-07	2.12501366926974e-07	8.88135157926321e-08	1.98495426257317e-06	-3.80169683885079e-06	3.97932387043605e-06
14	PreTest, EntryTest, ExitTest, TestEvery2Days, PCR 0D	12	0	0	0	0	5.43392904253785e-09	1.71835924181576e-07	-3.31364482353351e-07	3.42232340438427e-07	5.43392904253785e-09	1.71835924181576e-07	-3.31364482353351e-07	3.42232340438427e-07	4.41247848916737e-08	1.39534821522675e-06	-2.69075771695275e-06	2.7790072867361e-06
14	PreTest, EntryTest, ExitTest, TestEvery2Days, PCR 0D	13	0	0	0	0	0	0	0	0	0	0	0	0	0	0	0	0
14	PreTest, EntryTest, ExitTest, TestEvery2Days, PCR 0D	14	0	0	0	0	0	0	0	0	0	0	0	0	0	0	0	0
14	PreTest, EntryTest, ExitTest, TestEvery2Days, PCR 0D	15	0	0	0	0	0	0	0	0	0	0	0	0	0	0	0	0
14	PreTest, EntryTest, ExitTest, TestEvery2Days, PCR 0D	16	0	0	0	0	0	0	0	0	0	0	0	0	0	0	0	0
14	PreTest, EntryTest, ExitTest, TestEvery2Days, PCR 0D	17	0	0	0	0	0	0	0	0	0	0	0	0	0	0	0	0
14	PreTest, EntryTest, ExitTest, TestEvery2Days, PCR 0D	18	0	0	0	0	0	0	0	0	0	0	0	0	0	0	0	0
14	PreTest, EntryTest, ExitTest, TestEvery2Days, PCR 0D	19	0	0	0	0	0	0	0	0	0	0	0	0	0	0	0	0
14	PreTest, EntryTest, ExitTest, TestEvery2Days, PCR 0D	20	0	0	0	0	0	0	0	0	0	0	0	0	0	0	0	0
14	PreTest, EntryTest, ExitTest, TestEvery2Days, PCR 0D	21	0	0	0	0	0	0	0	0	0	0	0	0	0	0	0	0
15	PreTest, EntryTest, ExitTest, TestEvery2Days, Antigen	0	1648.14569021512	35.3345420682684	1578.88998776132	1717.40139266893	3249.23053163479	55.6857420411755	3140.08647723408	3358.37458603549	4897.37622184991	74.0981664990893	4752.1438155117	5042.60862818813	0.270961237686192	0.00290242134195687	0.265272491855957	0.276649983516428
15	PreTest, EntryTest, ExitTest, TestEvery2Days, Antigen	1	448.706843768056	18.5962570261763	412.258179996751	485.155507539362	892.169651668496	29.868998742295	833.626414133597	950.712889203394	1340.87649543655	39.7713816896232	1262.92458732489	1418.82840354821	0.0820602506282817	0.00180356685940968	0.0785252595838387	0.0855952416727246
15	PreTest, EntryTest, ExitTest, TestEvery2Days, Antigen	2	78.4370731165031	7.99564277240956	62.7656132825803	94.1085329504258	162.785309591945	13.0573658719073	137.192872483007	188.377746700883	241.222382708448	17.1493203096264	207.60971490158	274.835050515316	0.0244331098392884	0.00100948492631611	0.0224545193837088	0.026411700294868
15	PreTest, EntryTest, ExitTest, TestEvery2Days, Antigen	3	0.57186199769471	0.65654487614248	-0.714965959544552	1.85868995493397	1.3237670111163	1.14547012877699	-0.921354441286596	3.5688884635192	1.89562900881101	1.49385219633985	-1.0323212960151	4.82357931363713	0.00453780128416946	0.000438198405262721	0.00367893240985453	0.00539667015848439
15	PreTest, EntryTest, ExitTest, TestEvery2Days, Antigen	4	0.108075036217363	0.269158143111914	-0.419474924281989	0.635624996716716	0.284744238740323	0.51256317458597	-0.719879583448178	1.28936806092882	0.392819274957686	0.67008435930619	-0.920546069282446	1.70618461919782	0.00104374091070739	0.000210564558022458	0.000631034376983371	0.0014564474444314
15	PreTest, EntryTest, ExitTest, TestEvery2Days, Antigen	5	0	0	0	0	0.00209219601725664	0.0362818839174587	-0.0690202964609624	0.0732046884954757	0.00209219601725664	0.0362818839174587	-0.0690202964609624	0.0732046884954757	0.000149700290594982	7.82935133433771e-05	-3.75499555803731e-06	0.000303155576748001
15	PreTest, EntryTest, ExitTest, TestEvery2Days, Antigen	6	0	0	0	0	0.00207277733890428	0.0440536008476332	-0.0842722803224569	0.0884178350002654	0.00207277733890428	0.0440536008476332	-0.0842722803224569	0.0884178350002654	1.94615977235019e-05	2.95630492365019e-05	-3.84819787800419e-05	7.74051742270457e-05
15	PreTest, EntryTest, ExitTest, TestEvery2Days, Antigen	7	0	0	0	0	1.92021133786183e-05	0.000269570938182243	-0.000509156925458578	0.000547561152215815	1.92021133786183e-05	0.000269570938182243	-0.000509156925458578	0.000547561152215815	1.84861310784085e-06	8.8334327553737e-06	-1.54649150926916e-05	1.91621413083733e-05
15	PreTest, EntryTest, ExitTest, TestEvery2Days, Antigen	8	0	0	0	0	1.21698708003989e-05	0.000244692597362621	-0.000467427620030337	0.000491767361631135	1.21698708003989e-05	0.000244692597362621	-0.000467427620030337	0.000491767361631135	6.59889133973582e-07	5.35012240357479e-06	-9.826350777033e-06	1.11461290449802e-05
15	PreTest, EntryTest, ExitTest, TestEvery2Days, Antigen	9	0	0	0	0	9.70852928079716e-07	1.37983659560585e-05	-2.60739443457949e-05	2.80156502019544e-05	9.70852928079716e-07	1.37983659560585e-05	-2.60739443457949e-05	2.80156502019544e-05	5.28345882079799e-07	4.79659797037833e-06	-8.87298613986173e-06	9.92967790402133e-06
15	PreTest, EntryTest, ExitTest, TestEvery2Days, Antigen	10	0	0	0	0	3.26092231030535e-07	3.52964568829791e-06	-6.59201331803336e-06	7.24419778009443e-06	3.26092231030535e-07	3.52964568829791e-06	-6.59201331803336e-06	7.24419778009443e-06	7.48988859789189e-07	5.69841088920401e-06	-1.04198964830507e-05	1.19178742026291e-05
15	PreTest, EntryTest, ExitTest, TestEvery2Days, Antigen	11	0	0	0	0	5.28707949143473e-08	5.9403433354705e-07	-1.11143649883787e-06	1.21717808866657e-06	5.28707949143473e-08	5.9403433354705e-07	-1.11143649883787e-06	1.21717808866657e-06	4.85357435956883e-07	4.60457660009403e-06	-8.53961270022741e-06	9.51032757214117e-06
15	PreTest, EntryTest, ExitTest, TestEvery2Days, Antigen	12	0	0	0	0	4.17434237212126e-09	9.46320898955148e-08	-1.81304553823088e-07	1.8965323856733e-07	4.17434237212126e-09	9.46320898955148e-08	-1.81304553823088e-07	1.8965323856733e-07	8.85590507792025e-08	1.97925794354202e-06	-3.79078651856315e-06	3.96790462012156e-06
15	PreTest, EntryTest, ExitTest, TestEvery2Days, Antigen	13	0	0	0	0	0	0	0	0	0	0	0	0	0	0	0	0
15	PreTest, EntryTest, ExitTest, TestEvery2Days, Antigen	14	0	0	0	0	0	0	0	0	0	0	0	0	0	0	0	0
15	PreTest, EntryTest, ExitTest, TestEvery2Days, Antigen	15	0	0	0	0	0	0	0	0	0	0	0	0	0	0	0	0
15	PreTest, EntryTest, ExitTest, TestEvery2Days, Antigen	16	0	0	0	0	0	0	0	0	0	0	0	0	0	0	0	0
15	PreTest, EntryTest, ExitTest, TestEvery2Days, Antigen	17	0	0	0	0	0	0	0	0	0	0	0	0	0	0	0	0
15	PreTest, EntryTest, ExitTest, TestEvery2Days, Antigen	18	0	0	0	0	0	0	0	0	0	0	0	0	0	0	0	0
15	PreTest, EntryTest, ExitTest, TestEvery2Days, Antigen	19	0	0	0	0	0	0	0	0	0	0	0	0	0	0	0	0
15	PreTest, EntryTest, ExitTest, TestEvery2Days, Antigen	20	0	0	0	0	0	0	0	0	0	0	0	0	0	0	0	0
15	PreTest, EntryTest, ExitTest, TestEvery2Days, Antigen	21	0	0	0	0	0	0	0	0	0	0	0	0	0	0	0	0
16	PreTest, EntryTest, ExitTest, TestEvery2Days, PCR 1D	0	1842.15499010198	38.0357022583313	1767.60501367565	1916.70496652831	3632.70543700317	58.9627151924823	3517.1385152259	3748.27235878043	5474.86042710514	78.3433627777468	5321.30743606076	5628.41341814953	0.2517207644442	0.00283552069912893	0.246163143873907	0.257278385014492
16	PreTest, EntryTest, ExitTest, TestEvery2Days, PCR 1D	1	1724.90326023606	36.2080394895477	1653.93550283655	1795.87101763557	3629.54081321447	58.8927974087345	3514.11093029335	3744.97069613559	5354.44407345053	77.7466683203609	5202.06060354263	5506.82754335844	0.221465385428314	0.00272265881837415	0.2161289741443	0.226801796712327
16	PreTest, EntryTest, ExitTest, TestEvery2Days, PCR 1D	2	252.30676048948	14.1932673516526	224.487956480241	280.12556449872	554.79353631102	22.8759317517959	509.9567100775	599.63036254454	807.100296800501	30.7016388511645	746.925084652218	867.275508948783	0.0330072939884555	0.00116565609031406	0.0307226080514399	0.035291979925471
16	PreTest, EntryTest, ExitTest, TestEvery2Days, PCR 1D	3	33.7975172946941	4.62637822218818	24.7298159792053	42.865218610183	96.4826355342581	9.77717939215622	77.3193639256319	115.645907142884	130.280152828952	12.1819011386168	106.403626597263	154.156679060641	0.00606831662987724	0.000498484996507599	0.00509128603672235	0.00704534722303213
16	PreTest, EntryTest, ExitTest, TestEvery2Days, PCR 1D	4	0.222727227274843	0.383493925835638	-0.528920867363008	0.974375321912693	0.631873105942954	0.774151679882468	-0.885464186626683	2.14921039851259	0.854600333217796	0.984338047008785	-1.07470223891942	2.78390290535501	0.000213266072864506	9.67938888094748e-05	2.35500507979355e-05	0.000402982094931077
16	PreTest, EntryTest, ExitTest, TestEvery2Days, PCR 1D	5	0.0291825571182044	0.136278045791078	-0.237922412632308	0.296287526868717	0.119206728690709	0.320184791407191	-0.508355462467386	0.746768919848804	0.148389285808913	0.393081935505391	-0.622051307781654	0.91882987939948	3.81449750796395e-05	4.18913830884332e-05	-4.39621357736896e-05	0.000120252085932969
16	PreTest, EntryTest, ExitTest, TestEvery2Days, PCR 1D	6	0.000387319006938858	0.0122481024300135	-0.0236189617558877	0.0243935997697654	0.000700593217535031	0.0211702849674013	-0.0407931653185715	0.0421943517536415	0.00108791222447389	0.0334165991664944	-0.0644086221418552	0.0665844465908029	2.77399054434448e-06	1.0882344849041e-05	-1.85554053597759e-05	2.41033864484648e-05
16	PreTest, EntryTest, ExitTest, TestEvery2Days, PCR 1D	7	0	0	0	0	8.91831541698185e-05	0.00117090294487552	-0.00220578661778621	0.00238415292612585	8.91831541698185e-05	0.00117090294487552	-0.00220578661778621	0.00238415292612585	1.10346336210365e-06	6.8946652429076e-06	-1.24100805139953e-05	1.46170072382026e-05
16	PreTest, EntryTest, ExitTest, TestEvery2Days, PCR 1D	8	0	0	0	0	1.28162495270044e-06	1.62085157032595e-05	-3.04870658256881e-05	3.3050315731089e-05	1.28162495270044e-06	1.62085157032595e-05	-3.04870658256881e-05	3.3050315731089e-05	3.53666251495707e-07	4.410271162191e-06	-8.29046522639866e-06	8.99779772939007e-06
16	PreTest, EntryTest, ExitTest, TestEvery2Days, PCR 1D	9	0	0	0	0	2.05428006563347e-06	4.38011688584901e-05	-8.37960108970071e-05	8.7904571028274e-05	2.05428006563347e-06	4.38011688584901e-05	-8.37960108970071e-05	8.7904571028274e-05	4.85408173298401e-07	5.01305648729975e-06	-9.34018254180911e-06	1.03109988884059e-05
16	PreTest, EntryTest, ExitTest, TestEvery2Days, PCR 1D	10	0	0	0	0	3.23480913195693e-08	5.24320357922278e-07	-9.95319810208095e-07	1.06001599284723e-06	3.23480913195693e-08	5.24320357922278e-07	-9.95319810208095e-07	1.06001599284723e-06	2.20766123925185e-07	3.11591671136973e-06	-5.88643063035948e-06	6.32796287820985e-06
16	PreTest, EntryTest, ExitTest, TestEvery2Days, PCR 1D	11	0	0	0	0	4.71454609333743e-09	1.06013684098794e-07	-2.030722747403e-07	2.12501366926974e-07	4.71454609333743e-09	1.06013684098794e-07	-2.030722747403e-07	2.12501366926974e-07	8.88135157926321e-08	1.98495426257317e-06	-3.80169683885079e-06	3.97932387043605e-06
16	PreTest, EntryTest, ExitTest, TestEvery2Days, PCR 1D	12	0	0	0	0	0	0	0	0	0	0	0	0	0	0	0	0
16	PreTest, EntryTest, ExitTest, TestEvery2Days, PCR 1D	13	0	0	0	0	0	0	0	0	0	0	0	0	0	0	0	0
16	PreTest, EntryTest, ExitTest, TestEvery2Days, PCR 1D	14	0	0	0	0	0	0	0	0	0	0	0	0	0	0	0	0
16	PreTest, EntryTest, ExitTest, TestEvery2Days, PCR 1D	15	0	0	0	0	0	0	0	0	0	0	0	0	0	0	0	0
16	PreTest, EntryTest, ExitTest, TestEvery2Days, PCR 1D	16	0	0	0	0	0	0	0	0	0	0	0	0	0	0	0	0
16	PreTest, EntryTest, ExitTest, TestEvery2Days, PCR 1D	17	0	0	0	0	0	0	0	0	0	0	0	0	0	0	0	0
16	PreTest, EntryTest, ExitTest, TestEvery2Days, PCR 1D	18	0	0	0	0	0	0	0	0	0	0	0	0	0	0	0	0
16	PreTest, EntryTest, ExitTest, TestEvery2Days, PCR 1D	19	0	0	0	0	0	0	0	0	0	0	0	0	0	0	0	0
16	PreTest, EntryTest, ExitTest, TestEvery2Days, PCR 1D	20	0	0	0	0	0	0	0	0	0	0	0	0	0	0	0	0
16	PreTest, EntryTest, ExitTest, TestEvery2Days, PCR 1D	21	0	0	0	0	0	0	0	0	0	0	0	0	0	0	0	0
17	PreTest, EntryTest, ExitTest, TestEvery2Days, PCR 2D	0	1966.58951601102	39.4836353498063	1889.2015907254	2043.97744129664	3889.47626083929	61.6807147428202	3768.58205994337	4010.37046173522	5856.06577685031	81.8065324255426	5695.72497329625	6016.40658040438	0.247381496019424	0.00292612997502155	0.241646281268382	0.253116710770466
17	PreTest, EntryTest, ExitTest, TestEvery2Days, PCR 2D	1	1834.27296501121	37.3716232196753	1761.02458350064	1907.52134652177	3878.99280446903	61.6255524880459	3758.20672159246	3999.7788873456	5713.26576948024	80.6679781430007	5555.15653231996	5871.37500664052	0.223510672878142	0.00281509448994317	0.217993087677853	0.229028258078431
17	PreTest, EntryTest, ExitTest, TestEvery2Days, PCR 2D	2	1236.79238995443	28.695724152114	1180.54877061629	1293.03600929257	3450.97719508695	57.4959560982566	3338.28512113437	3563.66926903954	4687.76958504138	73.0557989226272	4544.58021915303	4830.95895092973	0.183945072242713	0.00261378494832659	0.178822053743993	0.189068090741433
17	PreTest, EntryTest, ExitTest, TestEvery2Days, PCR 2D	3	150.214677070427	9.81749199520134	130.972392759832	169.456961381021	499.346295169744	22.5118979923072	455.222975104822	543.469615234666	649.560972240171	28.2704907822551	594.150810306951	704.971134173391	0.0256621932332142	0.00107770566861615	0.0235498901227266	0.0277744963437019
17	PreTest, EntryTest, ExitTest, TestEvery2Days, PCR 2D	4	11.671431429466	2.43652301811251	6.89584631396547	16.4470165449665	55.1853334454355	6.78066280254936	41.8952343524388	68.4754325384323	66.8567648749015	8.1235365594117	50.9346332184546	82.7788965313484	0.00350353252711915	0.000398127041466141	0.00272320352584551	0.00428386152839278
17	PreTest, EntryTest, ExitTest, TestEvery2Days, PCR 2D	5	0.11353195735473	0.254252396255222	-0.384802739305505	0.611866654014965	0.441473216712628	0.602597691484365	-0.739618258596728	1.62256469202198	0.555005174067358	0.7433996079559	-0.902058057526205	2.01206840566092	4.07557505910027e-05	4.16815427760196e-05	-4.09400732499957e-05	0.000122451574432001
17	PreTest, EntryTest, ExitTest, TestEvery2Days, PCR 2D	6	0.00947977317955838	0.0743236307316501	-0.136194543054476	0.155154089413593	0.0534614098478559	0.194194919918114	-0.327160633191649	0.43408345288736	0.0629411830274143	0.231243369986948	-0.390295822147003	0.516178188201832	9.99597645765914e-06	2.12828501475315e-05	-3.17184098315025e-05	5.17103627468208e-05
17	PreTest, EntryTest, ExitTest, TestEvery2Days, PCR 2D	7	0	0	0	0	5.41494635440758e-05	0.00123983213535989	-0.00237592152176132	0.00248422044884947	5.41494635440758e-05	0.00123983213535989	-0.00237592152176132	0.00248422044884947	3.96175105895112e-07	4.15936927154553e-06	-7.75618866633412e-06	8.54853887812434e-06
17	PreTest, EntryTest, ExitTest, TestEvery2Days, PCR 2D	8	0	0	0	0	1.61674566295157e-05	0.000189635373837785	-0.000355517876092543	0.000387852789351575	1.61674566295157e-05	0.000189635373837785	-0.000355517876092543	0.000387852789351575	1.0578659976703e-06	7.02955987058697e-06	-1.27200713486802e-05	1.48358033440208e-05
17	PreTest, EntryTest, ExitTest, TestEvery2Days, PCR 2D	9	0	0	0	0	1.47838194488141e-06	3.54060918159861e-05	-6.79175580144513e-05	7.08743219042141e-05	1.47838194488141e-06	3.54060918159861e-05	-6.79175580144513e-05	7.08743219042141e-05	3.53135100942034e-07	3.93440361868701e-06	-7.35829599168451e-06	8.06456619356858e-06
17	PreTest, EntryTest, ExitTest, TestEvery2Days, PCR 2D	10	0	0	0	0	3.04240780481228e-07	4.77630516843039e-06	-9.05731734964234e-06	9.66579891060479e-06	3.04240780481228e-07	4.77630516843039e-06	-9.05731734964234e-06	9.66579891060479e-06	5.28317881680494e-07	4.79641914255313e-06	-8.87266363772364e-06	9.92929940108462e-06
17	PreTest, EntryTest, ExitTest, TestEvery2Days, PCR 2D	11	0	0	0	0	1.04624296459465e-08	2.06035411143765e-07	-3.93366976195832e-07	4.14291835487725e-07	1.04624296459465e-08	2.06035411143765e-07	-3.93366976195832e-07	4.14291835487725e-07	1.32149268168717e-07	2.4103093989689e-06	-4.59205715381033e-06	4.85635569014777e-06
17	PreTest, EntryTest, ExitTest, TestEvery2Days, PCR 2D	12	0	0	0	0	2.43289409680438e-09	7.69348665188001e-08	-1.48359444280044e-07	1.53225232473653e-07	2.43289409680438e-09	7.69348665188001e-08	-1.48359444280044e-07	1.53225232473653e-07	4.46707763780934e-08	1.41261398202822e-06	-2.72405262839722e-06	2.81339418115341e-06
17	PreTest, EntryTest, ExitTest, TestEvery2Days, PCR 2D	13	0	0	0	0	0	0	0	0	0	0	0	0	0	0	0	0
17	PreTest, EntryTest, ExitTest, TestEvery2Days, PCR 2D	14	0	0	0	0	0	0	0	0	0	0	0	0	0	0	0	0
17	PreTest, EntryTest, ExitTest, TestEvery2Days, PCR 2D	15	0	0	0	0	0	0	0	0	0	0	0	0	0	0	0	0
17	PreTest, EntryTest, ExitTest, TestEvery2Days, PCR 2D	16	0	0	0	0	0	0	0	0	0	0	0	0	0	0	0	0
17	PreTest, EntryTest, ExitTest, TestEvery2Days, PCR 2D	17	0	0	0	0	0	0	0	0	0	0	0	0	0	0	0	0
17	PreTest, EntryTest, ExitTest, TestEvery2Days, PCR 2D	18	0	0	0	0	0	0	0	0	0	0	0	0	0	0	0	0
17	PreTest, EntryTest, ExitTest, TestEvery2Days, PCR 2D	19	0	0	0	0	0	0	0	0	0	0	0	0	0	0	0	0
17	PreTest, EntryTest, ExitTest, TestEvery2Days, PCR 2D	20	0	0	0	0	0	0	0	0	0	0	0	0	0	0	0	0
17	PreTest, EntryTest, ExitTest, TestEvery2Days, PCR 2D	21	0	0	0	0	0	0	0	0	0	0	0	0	0	0	0	0
18	PreTest, EntryTest, ExitTest, TestEvery3Days, PCR 0D	0	1483.61485831983	33.1053648276369	1418.72834325766	1548.501373382	2923.8715414942	53.3166505721154	2819.37090637286	3028.37217661555	4407.48639981404	70.6846196306828	4268.9445453379	4546.02825429017	0.2340794115375	0.00278987990374451	0.228611246926161	0.239547576148839
18	PreTest, EntryTest, ExitTest, TestEvery3Days, PCR 0D	1	273.445242747667	15.3401234320445	243.37860082086	303.511884674474	543.185623606517	22.6971559135832	498.699198015894	587.672049197141	816.630866354184	31.0416367058202	755.789258410777	877.472474297592	0.0472943295309059	0.00139785264996826	0.0445545383369681	0.0500341207248437
18	PreTest, EntryTest, ExitTest, TestEvery3Days, PCR 0D	2	46.5463451007309	6.03840591708793	34.7110695032386	58.3816206982233	96.662260531915	9.81485593308539	77.4251429030676	115.899378160762	143.208605632646	12.9406738284873	117.844884928811	168.572326336481	0.0128182282632139	0.000727295268739022	0.0113927295364854	0.0142437269899424
18	PreTest, EntryTest, ExitTest, TestEvery3Days, PCR 0D	3	4.98831360110483	1.91862414743845	1.22781027212547	8.7488169300842	13.8293731719308	3.60777176606595	6.75814051044151	20.90060583342	18.8176867730356	4.65541964139431	9.69306427590276	27.9423092701685	0.00320662501443006	0.000366438517027216	0.00248840552105671	0.0039248445078034
18	PreTest, EntryTest, ExitTest, TestEvery3Days, PCR 0D	4	0.0168614938850372	0.107466573493912	-0.19377299016303	0.227495977933104	0.0812385687309007	0.22322286680551	-0.3562782502079	0.518755387669701	0.098100062615938	0.278060375683462	-0.446898273723647	0.643098398955523	0.000461878878222437	0.000141007451024917	0.000185504274213601	0.000738253482231274
18	PreTest, EntryTest, ExitTest, TestEvery3Days, PCR 0D	5	0.00284714796837423	0.0322657485871925	-0.060393719262523	0.0660880151992715	0.037925859987389	0.127128556061945	-0.211246109894023	0.287097829868801	0.0407730079557633	0.146312245384379	-0.245998992997619	0.327545008909146	9.85128046025219e-05	6.59025482845344e-05	-3.06561900351655e-05	0.000227681799240209
18	PreTest, EntryTest, ExitTest, TestEvery3Days, PCR 0D	6	0.000372090899417963	0.0117665473878138	-0.0226903419806971	0.0234345237795331	0.0138308683023481	0.0522647948672125	-0.0886081296373883	0.116269866242085	0.0142029592017661	0.0582730750106887	-0.100012267819184	0.128418186222716	4.11571181613065e-05	4.22069578211589e-05	-4.15685191681649e-05	0.000123882755490778
18	PreTest, EntryTest, ExitTest, TestEvery3Days, PCR 0D	7	0	0	0	0	0.000504442639162012	0.00227768993975922	-0.00395982964276605	0.00496871492109008	0.000504442639162012	0.00227768993975922	-0.00395982964276605	0.00496871492109008	8.23533688864039e-06	1.90018156561815e-05	-2.90082217974753e-05	4.54788955747561e-05
18	PreTest, EntryTest, ExitTest, TestEvery3Days, PCR 0D	8	0	0	0	0	0.000158241441108244	0.000556752810262715	-0.000932994067006678	0.00124947694922317	0.000158241441108244	0.000556752810262715	-0.000932994067006678	0.00124947694922317	1.10565728387771e-05	2.17725021563783e-05	-3.16175313877244e-05	5.37306770652785e-05
18	PreTest, EntryTest, ExitTest, TestEvery3Days, PCR 0D	9	0	0	0	0	8.61567935899667e-05	0.000476411651300507	-0.000847610042959026	0.00101992363013896	8.61567935899667e-05	0.000476411651300507	-0.000847610042959026	0.00101992363013896	1.88158625561778e-05	2.80432513008827e-05	-3.61489099935523e-05	7.3780635105908e-05
18	PreTest, EntryTest, ExitTest, TestEvery3Days, PCR 0D	10	0	0	0	0	8.880797978696e-06	4.35083767731594e-05	-7.63956204966964e-05	9.41572164540884e-05	8.880797978696e-06	4.35083767731594e-05	-7.63956204966964e-05	9.41572164540884e-05	1.32209723501329e-05	2.39949992719874e-05	-3.38092262229623e-05	6.02511709232281e-05
18	PreTest, EntryTest, ExitTest, TestEvery3Days, PCR 0D	11	0	0	0	0	2.77361737185982e-06	9.70601631938043e-06	-1.62501746141258e-05	2.17974093578455e-05	2.77361737185982e-06	9.70601631938043e-06	-1.62501746141258e-05	2.17974093578455e-05	1.20269541502357e-05	2.24959501844968e-05	-3.20651082113781e-05	5.61190165118494e-05
18	PreTest, EntryTest, ExitTest, TestEvery3Days, PCR 0D	12	0	0	0	0	6.30683414910651e-07	2.33348875206297e-06	-3.94295453913277e-06	5.20432136895407e-06	6.30683414910651e-07	2.33348875206297e-06	-3.94295453913277e-06	5.20432136895407e-06	5.98803852495008e-06	1.59749670063308e-05	-2.53228968074583e-05	3.72989738573584e-05
18	PreTest, EntryTest, ExitTest, TestEvery3Days, PCR 0D	13	0	0	0	0	6.87922223137321e-08	5.3980354795954e-07	-9.89222731686966e-07	1.12680717631443e-06	6.87922223137321e-08	5.3980354795954e-07	-9.89222731686966e-07	1.12680717631443e-06	1.05565598784236e-06	6.73538622657358e-06	-1.21457010162419e-05	1.42570129919266e-05
18	PreTest, EntryTest, ExitTest, TestEvery3Days, PCR 0D	14	0	0	0	0	4.58691046772639e-09	1.05961162908628e-07	-2.03096968833185e-07	2.12270789768638e-07	4.58691046772639e-09	1.05961162908628e-07	-2.03096968833185e-07	2.12270789768638e-07	8.81620942968749e-08	1.97037803042588e-06	-3.77377884533784e-06	3.95010303393159e-06
18	PreTest, EntryTest, ExitTest, TestEvery3Days, PCR 0D	15	0	0	0	0	0	0	0	0	0	0	0	0	0	0	0	0
18	PreTest, EntryTest, ExitTest, TestEvery3Days, PCR 0D	16	0	0	0	0	0	0	0	0	0	0	0	0	0	0	0	0
18	PreTest, EntryTest, ExitTest, TestEvery3Days, PCR 0D	17	0	0	0	0	0	0	0	0	0	0	0	0	0	0	0	0
18	PreTest, EntryTest, ExitTest, TestEvery3Days, PCR 0D	18	0	0	0	0	0	0	0	0	0	0	0	0	0	0	0	0
18	PreTest, EntryTest, ExitTest, TestEvery3Days, PCR 0D	19	0	0	0	0	0	0	0	0	0	0	0	0	0	0	0	0
18	PreTest, EntryTest, ExitTest, TestEvery3Days, PCR 0D	20	0	0	0	0	0	0	0	0	0	0	0	0	0	0	0	0
18	PreTest, EntryTest, ExitTest, TestEvery3Days, PCR 0D	21	0	0	0	0	0	0	0	0	0	0	0	0	0	0	0	0
19	PreTest, EntryTest, ExitTest, TestEvery3Days, Antigen	0	1648.14569021512	35.3345420682684	1578.88998776132	1717.40139266893	3249.23053163479	55.6857420411755	3140.08647723408	3358.37458603549	4897.37622184991	74.0981664990893	4752.1438155117	5042.60862818813	0.270961237686192	0.00290242134195687	0.265272491855957	0.276649983516428
19	PreTest, EntryTest, ExitTest, TestEvery3Days, Antigen	1	448.706843768056	18.5962570261763	412.258179996751	485.155507539362	892.169651668496	29.868998742295	833.626414133597	950.712889203394	1340.87649543655	39.7713816896232	1262.92458732489	1418.82840354821	0.0820602506282817	0.00180356685940968	0.0785252595838387	0.0855952416727246
19	PreTest, EntryTest, ExitTest, TestEvery3Days, Antigen	2	78.4370731165031	7.99564277240956	62.7656132825803	94.1085329504258	162.785309591945	13.0573658719073	137.192872483007	188.377746700883	241.222382708448	17.1493203096264	207.60971490158	274.835050515316	0.0244331098392884	0.00100948492631611	0.0224545193837088	0.026411700294868
19	PreTest, EntryTest, ExitTest, TestEvery3Days, Antigen	3	7.15626924236155	2.18584962797157	2.87200397153727	11.4405345131858	19.2643735488387	4.35297681473922	10.7325389919498	27.7962081057276	26.4206427912003	5.45367412283502	15.7314415104436	37.1098440719569	0.00641879674490146	0.000518316297050149	0.00540289680268317	0.00743469668711975
19	PreTest, EntryTest, ExitTest, TestEvery3Days, Antigen	4	0.028035664575448	0.151563234239262	-0.269028274533505	0.325099603684401	0.126270150960826	0.290081194366728	-0.44228898999796	0.694829291919612	0.154305815536274	0.352785563208723	-0.537153888352824	0.845765519425372	0.00119158360009856	0.000227982864874144	0.000744737184945239	0.00163843001525188
19	PreTest, EntryTest, ExitTest, TestEvery3Days, Antigen	5	0.00342368238893038	0.0457325212500059	-0.0862120592610811	0.0930594240389419	0.0451078630484688	0.111511386825589	-0.173454455129685	0.263670181226622	0.0485315454373991	0.135327760575633	-0.216710865290842	0.313773956165641	0.00023762695146092	0.000100816361373083	4.00268831696781e-05	0.000435227019752162
19	PreTest, EntryTest, ExitTest, TestEvery3Days, Antigen	6	0.000462511176638772	0.0146258876146298	-0.0282042285480356	0.0291292509013131	0.0199563332141547	0.0475939510356702	-0.0733278108157589	0.113240477244068	0.0204188443907934	0.0553990058831236	-0.0881632071401288	0.129000895921716	8.21551357107883e-05	6.28665442929731e-05	-4.10632911034389e-05	0.000205373562525016
19	PreTest, EntryTest, ExitTest, TestEvery3Days, Antigen	7	0	0	0	0	0.000893170561875932	0.00211991155101751	-0.0032618560781184	0.00504819720187026	0.000893170561875932	0.00211991155101751	-0.0032618560781184	0.00504819720187026	2.23782817311464e-05	3.28654668380593e-05	-4.20380332714499e-05	8.67945967337428e-05
19	PreTest, EntryTest, ExitTest, TestEvery3Days, Antigen	8	0	0	0	0	0.00038437093926701	0.00079954003607863	-0.00118272753144711	0.00195146940998113	0.00038437093926701	0.00079954003607863	-0.00118272753144711	0.00195146940998113	3.23860493963061e-05	3.70694697729581e-05	-4.02701113586917e-05	0.000105042210151304
19	PreTest, EntryTest, ExitTest, TestEvery3Days, Antigen	9	0	0	0	0	0.000158909461306691	0.000336336147384071	-0.000500309387566089	0.00081812831017947	0.000158909461306691	0.000336336147384071	-0.000500309387566089	0.00081812831017947	4.99093738304369e-05	4.81744735911623e-05	-4.45125944082413e-05	0.000144331342069115
19	PreTest, EntryTest, ExitTest, TestEvery3Days, Antigen	10	0	0	0	0	2.87564793864173e-05	7.4354707511431e-05	-0.000116978747335987	0.000174491706108822	2.87564793864173e-05	7.4354707511431e-05	-0.000116978747335987	0.000174491706108822	4.48034228078584e-05	4.43443124823237e-05	-4.21114296574961e-05	0.000131718275273213
19	PreTest, EntryTest, ExitTest, TestEvery3Days, Antigen	11	0	0	0	0	7.74174104404978e-06	1.9532506875743e-05	-3.05419724324066e-05	4.60254545205061e-05	7.74174104404978e-06	1.9532506875743e-05	-3.05419724324066e-05	4.60254545205061e-05	3.64415124205881e-05	4.13306840909355e-05	-4.45666283976455e-05	0.000117449653238822
19	PreTest, EntryTest, ExitTest, TestEvery3Days, Antigen	12	0	0	0	0	1.89183323824479e-06	5.74754399433409e-06	-9.37335299065002e-06	1.31570194671396e-05	1.89183323824479e-06	5.74754399433409e-06	-9.37335299065002e-06	1.31570194671396e-05	1.55074272805466e-05	2.62212686601619e-05	-3.58862592933708e-05	6.69011138544639e-05
19	PreTest, EntryTest, ExitTest, TestEvery3Days, Antigen	13	0	0	0	0	2.6092675988826e-07	1.44921019297869e-06	-2.57952521834997e-06	3.10137873812649e-06	2.6092675988826e-07	1.44921019297869e-06	-2.57952521834997e-06	3.10137873812649e-06	3.17070311363006e-06	1.15590794643522e-05	-1.94850926365003e-05	2.58264988637604e-05
19	PreTest, EntryTest, ExitTest, TestEvery3Days, Antigen	14	0	0	0	0	3.78526902415375e-08	4.7109427830032e-07	-8.85492095227089e-07	9.61197475710164e-07	3.78526902415375e-08	4.7109427830032e-07	-8.85492095227089e-07	9.61197475710164e-07	4.38719799111084e-07	4.78588496132131e-06	-8.94161472507869e-06	9.81905432330085e-06
19	PreTest, EntryTest, ExitTest, TestEvery3Days, Antigen	15	0	0	0	0	5.16095676325491e-09	1.15389713552179e-07	-2.21002881799016e-07	2.31324795325526e-07	5.16095676325491e-09	1.15389713552179e-07	-2.21002881799016e-07	2.31324795325526e-07	8.76774822816844e-08	1.9595735552037e-06	-3.75308668591757e-06	3.92844165048094e-06
19	PreTest, EntryTest, ExitTest, TestEvery3Days, Antigen	16	0	0	0	0	0	0	0	0	0	0	0	0	0	0	0	0
19	PreTest, EntryTest, ExitTest, TestEvery3Days, Antigen	17	0	0	0	0	0	0	0	0	0	0	0	0	0	0	0	0
19	PreTest, EntryTest, ExitTest, TestEvery3Days, Antigen	18	0	0	0	0	0	0	0	0	0	0	0	0	0	0	0	0
19	PreTest, EntryTest, ExitTest, TestEvery3Days, Antigen	19	0	0	0	0	0	0	0	0	0	0	0	0	0	0	0	0
19	PreTest, EntryTest, ExitTest, TestEvery3Days, Antigen	20	0	0	0	0	0	0	0	0	0	0	0	0	0	0	0	0
19	PreTest, EntryTest, ExitTest, TestEvery3Days, Antigen	21	0	0	0	0	0	0	0	0	0	0	0	0	0	0	0	0
20	PreTest, EntryTest, ExitTest, TestEvery3Days, PCR 1D	0	1842.15499010198	38.0357022583313	1767.60501367565	1916.70496652831	3632.70543700317	58.9627151924823	3517.1385152259	3748.27235878043	5474.86042710514	78.3433627777468	5321.30743606076	5628.41341814953	0.2517207644442	0.00283552069912893	0.246163143873907	0.257278385014492
20	PreTest, EntryTest, ExitTest, TestEvery3Days, PCR 1D	1	1724.90326023606	36.2080394895477	1653.93550283655	1795.87101763557	3629.54081321447	58.8927974087345	3514.11093029335	3744.97069613559	5354.44407345053	77.7466683203609	5202.06060354263	5506.82754335844	0.221465385428314	0.00272265881837415	0.2161289741443	0.226801796712327
20	PreTest, EntryTest, ExitTest, TestEvery3Days, PCR 1D	2	252.30676048948	14.1932673516526	224.487956480241	280.12556449872	554.79353631102	22.8759317517959	509.9567100775	599.63036254454	807.100296800501	30.7016388511645	746.925084652218	867.275508948783	0.0330072939884555	0.00116565609031406	0.0307226080514399	0.035291979925471
20	PreTest, EntryTest, ExitTest, TestEvery3Days, PCR 1D	3	33.7975172946941	4.62637822218818	24.7298159792053	42.865218610183	96.4826355342581	9.77717939215622	77.3193639256319	115.645907142884	130.280152828952	12.1819011386168	106.403626597263	154.156679060641	0.00606831662987724	0.000498484996507599	0.00509128603672235	0.00704534722303213
20	PreTest, EntryTest, ExitTest, TestEvery3Days, PCR 1D	4	2.63279985276841	1.18112876398507	0.317787475357666	4.94781223017915	9.88187157661675	2.91891565253189	4.16079689765424	15.6029462555793	12.5146714293852	3.5764623404808	5.50480524204279	19.5245376167275	0.000938574631690194	0.000201303785346841	0.000544019212410386	0.00133313005097
20	PreTest, EntryTest, ExitTest, TestEvery3Days, PCR 1D	5	0.00944253294016348	0.0674980773769798	-0.122853698718717	0.141738764599044	0.0434953444535381	0.169845309772816	-0.289401462701181	0.376392151608257	0.0529378773937016	0.214636589993124	-0.367749838992821	0.473625593780225	4.81902025963839e-05	4.53116358952372e-05	-4.0620603758281e-05	0.000137001008951049
20	PreTest, EntryTest, ExitTest, TestEvery3Days, PCR 1D	6	0.00138558202831525	0.0223694916322103	-0.0424586215708168	0.0452297856274473	0.0133007785977556	0.0775127091588078	-0.138624131353508	0.165225688549019	0.0146863606260709	0.0927749142788662	-0.167152471360507	0.196525192612649	2.33163845692639e-05	3.28137035714502e-05	-4.09984744307785e-05	8.76312435693063e-05
20	PreTest, EntryTest, ExitTest, TestEvery3Days, PCR 1D	7	0	0	0	0	0.00340239619746584	0.0159981637153742	-0.0279540046846675	0.0347587970795992	0.00340239619746584	0.0159981637153742	-0.0279540046846675	0.0347587970795992	3.09291112751335e-05	3.75017421840688e-05	-4.25743034056414e-05	0.000104432525955908
20	PreTest, EntryTest, ExitTest, TestEvery3Days, PCR 1D	8	0	0	0	0	0.00011754998050406	0.000539824205451509	-0.000940505462180897	0.00117560542318902	0.00011754998050406	0.000539824205451509	-0.000940505462180897	0.00117560542318902	8.0170256433661e-06	1.85355777930258e-05	-2.83127068309646e-05	4.43467581176968e-05
20	PreTest, EntryTest, ExitTest, TestEvery3Days, PCR 1D	9	0	0	0	0	3.81984758759183e-05	0.000143825700246273	-0.000243699896606776	0.000320096848358613	3.81984758759183e-05	0.000143825700246273	-0.000243699896606776	0.000320096848358613	1.22462059048868e-05	2.31832353061872e-05	-3.31929352952401e-05	5.76853471050137e-05
20	PreTest, EntryTest, ExitTest, TestEvery3Days, PCR 1D	10	0	0	0	0	1.99293510076326e-05	9.67175238544159e-05	-0.000169636995747023	0.000209495697762288	1.99293510076326e-05	9.67175238544159e-05	-0.000169636995747023	0.000209495697762288	1.98253512759762e-05	2.90133487806353e-05	-3.7040812334069e-05	7.66915148860215e-05
20	PreTest, EntryTest, ExitTest, TestEvery3Days, PCR 1D	11	0	0	0	0	1.96654489472637e-06	9.31024172044239e-06	-1.62815288773407e-05	2.02146186667935e-05	1.96654489472637e-06	9.31024172044239e-06	-1.62815288773407e-05	2.02146186667935e-05	1.01364328631945e-05	2.0832236217557e-05	-3.06947501232172e-05	5.09676158496062e-05
20	PreTest, EntryTest, ExitTest, TestEvery3Days, PCR 1D	12	0	0	0	0	5.45437045138787e-07	2.37202881997697e-06	-4.10373944201607e-06	5.19461353229364e-06	5.45437045138787e-07	2.37202881997697e-06	-4.10373944201607e-06	5.19461353229364e-06	5.02076847480757e-06	1.46841508988797e-05	-2.37601672869967e-05	3.38017042366118e-05
20	PreTest, EntryTest, ExitTest, TestEvery3Days, PCR 1D	13	0	0	0	0	8.44869258441221e-08	5.7705211773362e-07	-1.04653522491377e-06	1.21550907660202e-06	8.44869258441221e-08	5.7705211773362e-07	-1.04653522491377e-06	1.21550907660202e-06	1.31989482418163e-06	7.76228167718219e-06	-1.38941772630955e-05	1.65339669114587e-05
20	PreTest, EntryTest, ExitTest, TestEvery3Days, PCR 1D	14	0	0	0	0	4.58691046772639e-09	1.05961162908628e-07	-2.03096968833185e-07	2.12270789768638e-07	4.58691046772639e-09	1.05961162908628e-07	-2.03096968833185e-07	2.12270789768638e-07	8.81620942968749e-08	1.97037803042588e-06	-3.77377884533784e-06	3.95010303393159e-06
20	PreTest, EntryTest, ExitTest, TestEvery3Days, PCR 1D	15	0	0	0	0	0	0	0	0	0	0	0	0	0	0	0	0
20	PreTest, EntryTest, ExitTest, TestEvery3Days, PCR 1D	16	0	0	0	0	0	0	0	0	0	0	0	0	0	0	0	0
20	PreTest, EntryTest, ExitTest, TestEvery3Days, PCR 1D	17	0	0	0	0	0	0	0	0	0	0	0	0	0	0	0	0
20	PreTest, EntryTest, ExitTest, TestEvery3Days, PCR 1D	18	0	0	0	0	0	0	0	0	0	0	0	0	0	0	0	0
20	PreTest, EntryTest, ExitTest, TestEvery3Days, PCR 1D	19	0	0	0	0	0	0	0	0	0	0	0	0	0	0	0	0
20	PreTest, EntryTest, ExitTest, TestEvery3Days, PCR 1D	20	0	0	0	0	0	0	0	0	0	0	0	0	0	0	0	0
20	PreTest, EntryTest, ExitTest, TestEvery3Days, PCR 1D	21	0	0	0	0	0	0	0	0	0	0	0	0	0	0	0	0
21	PreTest, EntryTest, ExitTest, TestEvery3Days, PCR 2D	0	1966.58951601102	39.4836353498063	1889.2015907254	2043.97744129664	3889.47626083929	61.6807147428202	3768.58205994337	4010.37046173522	5856.06577685031	81.8065324255426	5695.72497329625	6016.40658040438	0.247381496019424	0.00292612997502155	0.241646281268382	0.253116710770466
21	PreTest, EntryTest, ExitTest, TestEvery3Days, PCR 2D	1	1834.27296501121	37.3716232196753	1761.02458350064	1907.52134652177	3878.99280446903	61.6255524880459	3758.20672159246	3999.7788873456	5713.26576948024	80.6679781430007	5555.15653231996	5871.37500664052	0.223510672878142	0.00281509448994317	0.217993087677853	0.229028258078431
21	PreTest, EntryTest, ExitTest, TestEvery3Days, PCR 2D	2	1236.79238995443	28.695724152114	1180.54877061629	1293.03600929257	3450.97719508695	57.4959560982566	3338.28512113437	3563.66926903954	4687.76958504138	73.0557989226272	4544.58021915303	4830.95895092973	0.183945072242713	0.00261378494832659	0.178822053743993	0.189068090741433
21	PreTest, EntryTest, ExitTest, TestEvery3Days, PCR 2D	3	150.214677070427	9.81749199520134	130.972392759832	169.456961381021	499.346295169744	22.5118979923072	455.222975104822	543.469615234666	649.560972240171	28.2704907822551	594.150810306951	704.971134173391	0.0256621932332142	0.00107770566861615	0.0235498901227266	0.0277744963437019
21	PreTest, EntryTest, ExitTest, TestEvery3Days, PCR 2D	4	11.671431429466	2.43652301811251	6.89584631396547	16.4470165449665	55.1853334454355	6.78066280254936	41.8952343524388	68.4754325384323	66.8567648749015	8.1235365594117	50.9346332184546	82.7788965313484	0.00350353252711915	0.000398127041466141	0.00272320352584551	0.00428386152839278
21	PreTest, EntryTest, ExitTest, TestEvery3Days, PCR 2D	5	0.713161649552741	0.581976951379431	-0.427513175150945	1.85383647425643	4.41086395928441	1.81828470070367	0.847025945905207	7.97470197266361	5.12402560883715	2.1193899041745	0.97002139665513	9.27802982101917	0.000521033272276087	0.000157511989588263	0.000212309772683092	0.000829756771869082
21	PreTest, EntryTest, ExitTest, TestEvery3Days, PCR 2D	6	0.00195984620829841	0.0259695568990977	-0.0489404853139331	0.05286017773053	0.016510365257984	0.093170895995014	-0.166104590892243	0.199125321408211	0.0184702114662824	0.109075601780591	-0.195317968023676	0.232258390956241	1.29035011990213e-05	2.38713995976722e-05	-3.38844420124161e-05	5.96914444104587e-05
21	PreTest, EntryTest, ExitTest, TestEvery3Days, PCR 2D	7	0.00153032445644768	0.0393724376813077	-0.0756396533989154	0.0787003023118108	0.00662422661606356	0.0613620694168383	-0.113645429440939	0.126893882673067	0.00815455107251124	0.0809674723810563	-0.150541694794359	0.166850796939382	1.85969885502908e-05	2.83665185235661e-05	-3.70013877558988e-05	7.41953648564804e-05
21	PreTest, EntryTest, ExitTest, TestEvery3Days, PCR 2D	8	0	0	0	0	0.000704629451796865	0.00197724791799443	-0.00317077646747222	0.00458003537106595	0.000704629451796865	0.00197724791799443	-0.00317077646747222	0.00458003537106595	3.18170128095347e-05	3.759778592907e-05	-4.18746476114425e-05	0.000105508673230512
21	PreTest, EntryTest, ExitTest, TestEvery3Days, PCR 2D	9	0	0	0	0	2.52383058143692e-05	0.000126822258846536	-0.000223333321524841	0.00027380993315358	2.52383058143692e-05	0.000126822258846536	-0.000223333321524841	0.00027380993315358	8.01714634177755e-06	1.99533922287636e-05	-3.10915024265991e-05	4.71257951101542e-05
21	PreTest, EntryTest, ExitTest, TestEvery3Days, PCR 2D	10	0	0	0	0	9.56150915675715e-06	3.75345685317177e-05	-6.40062451654095e-05	8.31292634789238e-05	9.56150915675715e-06	3.75345685317177e-05	-6.40062451654095e-05	8.31292634789238e-05	1.28329380298572e-05	2.40288294798192e-05	-3.42635677505885e-05	5.99294438103029e-05
21	PreTest, EntryTest, ExitTest, TestEvery3Days, PCR 2D	11	0	0	0	0	3.80780994543042e-06	1.37752631992898e-05	-2.31917059251777e-05	3.08073258160385e-05	3.80780994543042e-06	1.37752631992898e-05	-2.31917059251777e-05	3.08073258160385e-05	1.42333674788879e-05	2.47374777446906e-05	-3.42520889007056e-05	6.27188238584815e-05
21	PreTest, EntryTest, ExitTest, TestEvery3Days, PCR 2D	12	0	0	0	0	3.58619653311728e-07	1.59651165942779e-06	-2.77054319916675e-06	3.4877825057902e-06	3.58619653311728e-07	1.59651165942779e-06	-2.77054319916675e-06	3.4877825057902e-06	3.87278685527154e-06	1.38035515415476e-05	-2.31821741661618e-05	3.09277478767048e-05
21	PreTest, EntryTest, ExitTest, TestEvery3Days, PCR 2D	13	0	0	0	0	5.81235975859076e-08	3.9821634348279e-07	-7.22380435640362e-07	8.38627630812177e-07	5.81235975859076e-08	3.9821634348279e-07	-7.22380435640362e-07	8.38627630812177e-07	1.05609567351733e-06	6.73817367077825e-06	-1.2150724721208e-05	1.42629160682427e-05
21	PreTest, EntryTest, ExitTest, TestEvery3Days, PCR 2D	14	0	0	0	0	2.01626685918325e-08	3.60785189497007e-07	-6.869763028223e-07	7.27301640005965e-07	2.01626685918325e-08	3.60785189497007e-07	-6.869763028223e-07	7.27301640005965e-07	2.19679503586405e-07	3.10052303537383e-06	-5.8573456457463e-06	6.29670465291911e-06
21	PreTest, EntryTest, ExitTest, TestEvery3Days, PCR 2D	15	0	0	0	0	0	0	0	0	0	0	0	0	0	0	0	0
21	PreTest, EntryTest, ExitTest, TestEvery3Days, PCR 2D	16	0	0	0	0	0	0	0	0	0	0	0	0	0	0	0	0
21	PreTest, EntryTest, ExitTest, TestEvery3Days, PCR 2D	17	0	0	0	0	0	0	0	0	0	0	0	0	0	0	0	0
21	PreTest, EntryTest, ExitTest, TestEvery3Days, PCR 2D	18	0	0	0	0	0	0	0	0	0	0	0	0	0	0	0	0
21	PreTest, EntryTest, ExitTest, TestEvery3Days, PCR 2D	19	0	0	0	0	0	0	0	0	0	0	0	0	0	0	0	0
21	PreTest, EntryTest, ExitTest, TestEvery3Days, PCR 2D	20	0	0	0	0	0	0	0	0	0	0	0	0	0	0	0	0
21	PreTest, EntryTest, ExitTest, TestEvery3Days, PCR 2D	21	0	0	0	0	0	0	0	0	0	0	0	0	0	0	0	0
