# Supplementary material for: Border Control for Infectious Respiratory Disease Pandemics: A Modelling Study for H1N1 and Four Strains of SARS-CoV-2
Source: Viruses. 2023 Apr 16;15(4):978. doi: 10.3390/v15040978 (PMC10144227; doi:10.3390/v15040978)
Supplement: Supplementary file 1 [file viruses-15-00978-s001.zip › Table S1.2 - Outcomes for Alpha.csv]

StrategyNo	StrategyDescription	QDays	TR_Sympt_Mean	TR_Sympt_SD	TR_Sympt_2_5th_Percentile	TR_Sympt_97_5th_Percentile	TR_NoSympt_Mean	TR_NoSympt_SD	TR_NoSympt_2_5th_Percentile	TR_NoSympt_97_5th_Percentile	TR_Total_Mean	TR_Total_SD	TR_Total_2_5th_Percentile	TR_Total_97_5th_Percentile	Missed_Proportion_Mean	Missed_Proportion_SD	Missed_Proportion_2_5th_Percentile	Missed_Proportion_97_5th_Percentile
1	Quarantine Only	0	3274.19302198396	45.9187610579325	3184.19225031042	3364.19379365751	9206.92641729417	88.0342210789882	9034.37934397935	9379.47349060899	12481.1194392781	108.352740529312	12268.7480678407	12693.4908107156	0.94331177716807	0.0016207323213772	0.940135141818171	0.94648841251797
1	Quarantine Only	1	2250.44829722762	37.2903264052352	2177.35925747335	2323.53733698188	6885.10032282964	74.7451590554829	6738.5998110809	7031.60083457839	9135.54862005726	91.9745274176772	8955.27854631861	9315.81869379591	0.80158508923151	0.00267901710897954	0.79633421569791	0.80683596276511
1	Quarantine Only	2	1229.3818435741	26.656452173474	1177.1351973141	1281.62848983411	4561.40652151277	59.1150681292913	4445.54098797935	4677.27205504618	5790.78836508687	72.7679849377901	5648.1631146088	5933.41361556494	0.660013219943369	0.00329208143835058	0.653560740324202	0.666465699562536
1	Quarantine Only	3	431.900600136364	14.563303546575	403.356525185078	460.444675087651	2256.52051321024	39.6574057511262	2178.79199793804	2334.24902848245	2688.42111334661	47.5729526486417	2595.17812615527	2781.66410053795	0.527985488215466	0.00345119409427919	0.521221147790678	0.534749828640253
1	Quarantine Only	4	84.2417413781031	6.27879017347436	71.9353126380933	96.5481701181128	736.939500817486	20.5078933228797	696.744029904641	777.13497173033	821.181242195589	24.0248122504409	774.092610184725	868.269874206453	0.431540740596053	0.00343968062384929	0.424798966573308	0.438282514618797
1	Quarantine Only	5	12.545604214495	2.26109151028188	8.11386485434249	16.9773435746475	189.78072724991	8.33269050057889	173.448653868776	206.112800631045	202.326331464405	9.44275686735687	183.818528004386	220.834134924425	0.365608447481056	0.00331871395690679	0.359103768125519	0.372113126836594
1	Quarantine Only	6	1.74814839608333	0.842383305616473	0.0970771170750437	3.39921967509162	42.4771998636721	3.32423620576344	35.9616969003758	48.9927028269685	44.2253482597555	3.75419426362622	36.8671275030481	51.5835690164629	0.307434057326246	0.00314980691150605	0.301260435779694	0.313607678872798
1	Quarantine Only	7	0.263547987625894	0.327350075197675	-0.378058159761549	0.905154135013338	8.76117082653946	1.25472418839808	6.30191141727923	11.2204302357997	9.02471881416536	1.42632301589752	6.22912570300623	11.8203119253245	0.250418740265048	0.00298981354051675	0.244558705725635	0.256278774804461
1	Quarantine Only	8	0.0382397616118563	0.123789159987623	-0.204386991963885	0.280866515187597	1.73572278361878	0.493193357530981	0.769063802858061	2.70238176437951	1.77396254523064	0.560272113903324	0.675829201980126	2.87209588848116	0.193625891077655	0.00272556457653733	0.188283784507642	0.198967997647668
1	Quarantine Only	9	0.00577283807994843	0.0481131534659624	-0.0885289427133379	0.100074618873235	0.336605413295884	0.201152730172049	-0.0576539378413323	0.7308647644331	0.342378251375832	0.229346076119019	-0.107140057817445	0.791896560569109	0.136959597339947	0.00226806477116253	0.132514190388469	0.141405004291426
1	Quarantine Only	10	0.00111280303021881	0.0179285781234389	-0.0340272100917214	0.036252816152159	0.0661243689614483	0.0905104373106307	-0.111276088167388	0.243524826090285	0.0672371719916671	0.10241799231438	-0.133502092944518	0.267976436927852	0.0811463724991748	0.0017988482154342	0.0776206299969237	0.0846721150014258
1	Quarantine Only	11	0.000528096758745934	0.0120326806719667	-0.0230559573583087	0.0241121508758006	0.0134195358473528	0.0431946331929783	-0.0712419452108847	0.0980810169055902	0.0139476326060987	0.0520672681595597	-0.0881042129866383	0.115999478198836	0.0349422772466624	0.00122230888069824	0.0325465518404938	0.0373380026528309
1	Quarantine Only	12	0	0	0	0	0.00208050965490189	0.00759697824045189	-0.0128095676963838	0.0169705870061876	0.00208050965490189	0.00759697824045189	-0.0128095676963838	0.0169705870061876	0.0100393677561224	0.000682742446120035	0.00870119256172717	0.0113775429505177
1	Quarantine Only	13	0	0	0	0	0.00030533096398293	0.00115612910347796	-0.00196068207883388	0.00257134400679974	0.00030533096398293	0.00115612910347796	-0.00196068207883388	0.00257134400679974	0.00201998905843263	0.000292196713315582	0.00144728350033409	0.00259269461653117
1	Quarantine Only	14	0	0	0	0	3.99833115832604e-05	0.000159254899467511	-0.000272156291373062	0.000352122914539583	3.99833115832604e-05	0.000159254899467511	-0.000272156291373062	0.000352122914539583	0.000317999165085024	0.00012056611498243	8.16895797194605e-05	0.000554308750450588
1	Quarantine Only	15	0	0	0	0	4.79385389765717e-06	2.26769484069259e-05	-3.96529649799177e-05	4.9240672775232e-05	4.79385389765717e-06	2.26769484069259e-05	-3.96529649799177e-05	4.9240672775232e-05	4.10099810460803e-05	4.45118377693134e-05	-4.62332209817741e-05	0.000128253183073935
1	Quarantine Only	16	0	0	0	0	5.92420138131422e-07	3.62480099834257e-06	-6.51218981862002e-06	7.69703009488287e-06	5.92420138131422e-07	3.62480099834257e-06	-6.51218981862002e-06	7.69703009488287e-06	5.95175956813393e-06	1.6376009799744e-05	-2.61452196393644e-05	3.80487387756322e-05
1	Quarantine Only	17	0	0	0	0	7.30659673056068e-08	7.29930458217342e-07	-1.35759773080038e-06	1.5037296654116e-06	7.30659673056068e-08	7.29930458217342e-07	-1.35759773080038e-06	1.5037296654116e-06	8.03658317129e-07	6.1144051543573e-06	-1.11805757854113e-05	1.27878924196693e-05
1	Quarantine Only	18	0	0	0	0	9.66163266374838e-09	1.86266886700971e-07	-3.55421465270154e-07	3.74744730597651e-07	9.66163266374838e-09	1.86266886700971e-07	-3.55421465270154e-07	3.74744730597651e-07	1.41566266548131e-07	2.58213890778232e-06	-4.91942599270521e-06	5.20255852580147e-06
1	Quarantine Only	19	0	0	0	0	1.65870317917713e-09	5.24528000836211e-08	-1.0114878498472e-07	1.04466191343075e-07	1.65870317917713e-09	5.24528000836211e-08	-1.0114878498472e-07	1.04466191343075e-07	4.68581603486247e-08	1.48178513667044e-06	-2.85744070752543e-06	2.95115702822268e-06
1	Quarantine Only	20	0	0	0	0	0	0	0	0	0	0	0	0	0	0	0	0
1	Quarantine Only	21	0	0	0	0	0	0	0	0	0	0	0	0	0	0	0	0
2	PreTest, EntryTest, PCR 0D	0	1224.78224418244	29.443809111947	1167.07237832302	1282.49211004186	2785.05227896923	49.810256691039	2687.42417585479	2882.68038208366	4009.83452315167	64.3501420982399	3883.70824463912	4135.96080166422	0.240174062851818	0.00290668265993468	0.234476964838346	0.24587116086529
2	PreTest, EntryTest, PCR 0D	1	1189.30011692685	28.9441434064757	1132.56959585016	1246.03063800354	2784.45475884625	49.8007117854943	2686.84536374668	2882.06415394582	3973.7548757731	64.2919142062846	3847.74272392878	4099.76702761742	0.204707430231294	0.00272369460369746	0.199368988808047	0.210045871654541
2	PreTest, EntryTest, PCR 0D	2	866.664450071048	22.8094263384771	821.957974447633	911.370925694463	2653.96080035294	48.1748871970719	2559.53802144668	2748.38357925921	3520.62525042399	60.4332382730053	3402.1761034089	3639.07439743908	0.167496091663439	0.0025713795488855	0.162456187747623	0.172535995579254
2	PreTest, EntryTest, PCR 0D	3	345.573300871863	12.9149927283936	320.259915124212	370.886686619514	1594.1004169915	35.5916124927544	1524.3408565057	1663.85997747729	1939.67371786336	42.6613621975494	1856.05744795616	2023.28998777056	0.112867630287685	0.00217526010746554	0.108604120477053	0.117131140098318
2	PreTest, EntryTest, PCR 0D	4	69.002774948286	5.60481119300043	58.0173450100051	79.9882048865668	553.965245491814	18.7521790741784	517.210974506425	590.719516477204	622.9680204401	21.7491576445781	580.339671456727	665.596369423473	0.0782990319594777	0.0018254273398589	0.0747211943733542	0.0818768695456011
2	PreTest, EntryTest, PCR 0D	5	10.162333293578	1.98548379531914	6.27078505475248	14.0538815324035	146.289062098542	7.52865723858784	131.53289391091	161.045230286175	156.45139539212	8.43305866503416	139.922600408653	172.980190375587	0.0698207743456148	0.00171037773022956	0.0664684339943649	0.0731731146968648
2	PreTest, EntryTest, PCR 0D	6	1.39378152247268	0.74096058203223	-0.0585012183104896	2.84606426325585	33.1084511250387	2.96195085862404	27.3030274421356	38.9138748079418	34.5022326475114	3.32203873132873	27.9910367341071	41.0134285609157	0.0683622301847504	0.00168630946224005	0.0650570636387599	0.0716673967307409
2	PreTest, EntryTest, PCR 0D	7	0.209737829210675	0.289140149499673	-0.356976863808684	0.776452522230035	6.8620168439434	1.119506899836	4.66778332026485	9.05625036762195	7.07175467315408	1.26478859293304	4.59276903100531	9.55074031530284	0.0681228730373673	0.00169111467937159	0.064808288265799	0.0714374578089356
2	PreTest, EntryTest, PCR 0D	8	0.0323074554548577	0.115078692192771	-0.193246781242974	0.257861692152689	1.36536876312735	0.449113313367807	0.485106668926444	2.24563085732825	1.3976762185822	0.508519230025172	0.400978527732866	2.39437390943154	0.0679670402500518	0.00168542856358664	0.064663600265422	0.0712704802346817
2	PreTest, EntryTest, PCR 0D	9	0.00369294493386939	0.0346510090669221	-0.0642230328372979	0.0716089227050366	0.266312769647998	0.189522339284277	-0.105151015349185	0.63777655464518	0.270005714581867	0.211492502256454	-0.144519589840783	0.684531019004517	0.06546092459933	0.00165105616012015	0.0622248545254945	0.0686969946731655
2	PreTest, EntryTest, PCR 0D	10	0.00111280303021881	0.0179285781234389	-0.0340272100917214	0.036252816152159	0.0540164572352668	0.0895887410256554	-0.121577475175018	0.229610389645551	0.0551292602654856	0.101491169121314	-0.14379343121229	0.254051951743261	0.0508778978758225	0.0014761504919783	0.047984642911545	0.0537711528401
2	PreTest, EntryTest, PCR 0D	11	0.000528096758745934	0.0120326806719667	-0.0230559573583087	0.0241121508758006	0.0113776934628176	0.0431041251865168	-0.0731063919027554	0.0958617788283905	0.0119057902215635	0.0519615826078203	-0.0899389116897643	0.113750492132891	0.0256641823101111	0.00106675831046054	0.0235733360216084	0.0277550285986138
2	PreTest, EntryTest, PCR 0D	12	0	0	0	0	0.00176583230077509	0.0075978860860788	-0.0131260244279394	0.0166576890294895	0.00176583230077509	0.0075978860860788	-0.0131260244279394	0.0166576890294895	0.00792412380643356	0.000620916881434557	0.00670712671882182	0.00914112089404529
2	PreTest, EntryTest, PCR 0D	13	0	0	0	0	0.000261797900217914	0.00115622760889141	-0.00200440821320925	0.00252800401364508	0.000261797900217914	0.00115622760889141	-0.00200440821320925	0.00252800401364508	0.00164251123208916	0.000264693847498514	0.00112371129099207	0.00216131117318625
2	PreTest, EntryTest, PCR 0D	14	0	0	0	0	3.45394371508421e-05	0.000159061862414876	-0.000277221813182314	0.000346300687483998	3.45394371508421e-05	0.000159061862414876	-0.000277221813182314	0.000346300687483998	0.000260150390607293	0.00010955780672789	4.54170894206292e-05	0.000474883691793958
2	PreTest, EntryTest, PCR 0D	15	0	0	0	0	4.17910369596714e-06	2.24467862393285e-05	-3.98165973331168e-05	4.81748047250511e-05	4.17910369596714e-06	2.24467862393285e-05	-3.98165973331168e-05	4.81748047250511e-05	3.42983191455202e-05	4.06834769996672e-05	-4.54412957738274e-05	0.000114037934064868
2	PreTest, EntryTest, PCR 0D	16	0	0	0	0	4.99149578315238e-07	3.42275856936551e-06	-6.20945721764117e-06	7.20775637427164e-06	4.99149578315238e-07	3.42275856936551e-06	-6.20945721764117e-06	7.20775637427164e-06	4.95724701071524e-06	1.50821859634414e-05	-2.46038374776299e-05	3.45183314990604e-05
2	PreTest, EntryTest, PCR 0D	17	0	0	0	0	5.44234453907864e-08	5.8347049428416e-07	-1.08917872340617e-06	1.19802561418774e-06	5.44234453907864e-08	5.8347049428416e-07	-1.08917872340617e-06	1.19802561418774e-06	7.09842981724027e-07	5.75525964716654e-06	-1.05704659267224e-05	1.19901518901705e-05
2	PreTest, EntryTest, PCR 0D	18	0	0	0	0	2.85328483597359e-09	9.02287889489647e-08	-1.73995141503997e-07	1.79701711175944e-07	2.85328483597359e-09	9.02287889489647e-08	-1.73995141503997e-07	1.79701711175944e-07	4.77509311431573e-08	1.51001702806245e-06	-2.91188244385924e-06	3.00738430614556e-06
2	PreTest, EntryTest, PCR 0D	19	0	0	0	0	0	0	0	0	0	0	0	0	0	0	0	0
2	PreTest, EntryTest, PCR 0D	20	0	0	0	0	0	0	0	0	0	0	0	0	0	0	0	0
2	PreTest, EntryTest, PCR 0D	21	0	0	0	0	0	0	0	0	0	0	0	0	0	0	0	0
3	PreTest, EntryTest, Antigen	0	1362.85149894509	30.8633381705941	1302.35935613073	1423.34364175946	3103.3532901435	53.0642279476689	2999.34740336607	3207.35917692093	4466.20478908859	68.3920194616923	4332.15643094368	4600.25314723351	0.2771377902328	0.00309253107533759	0.271076429325138	0.283199151140462
3	PreTest, EntryTest, Antigen	1	1317.02933725871	30.255098212873	1257.72934476148	1376.32932975594	3102.6598064814	53.0544580397978	2998.67306872339	3206.6465442394	4419.68914374011	68.2397290687156	4285.93927476543	4553.43901271479	0.234989735102501	0.0029112009752817	0.229283781190949	0.240695689014053
3	PreTest, EntryTest, Antigen	2	947.508931109873	23.5713428616437	901.309099101051	993.708763118695	2933.82051404321	50.8827190499205	2834.09038470537	3033.55064338105	3881.32944515308	63.27520245223	3757.31004834671	4005.34884195945	0.189055699501898	0.00268851216621836	0.18378621565611	0.194325183347686
3	PreTest, EntryTest, Antigen	3	372.32185120611	13.3860327121212	346.085227090353	398.558475321868	1734.24975775511	36.8160888470995	1662.0902236148	1806.40929189543	2106.57160896122	44.006553087436	2020.31876490985	2192.8244530126	0.125568442749797	0.00225652896637073	0.12114564597571	0.129991239523884
3	PreTest, EntryTest, Antigen	4	74.2839543696791	5.87134508302668	62.7761180069468	85.7917907324114	599.891569773407	19.1254307072432	562.40572558721	637.377413959604	674.175524143086	22.3652268466056	630.339679523739	718.011368762433	0.087204529349622	0.00192292354725548	0.0834355991970013	0.0909734595022428
3	PreTest, EntryTest, Antigen	5	11.0352151342661	2.08589405120643	6.94686279390154	15.1235674746307	158.203446314381	7.68895009899446	143.133104120352	173.273788508411	169.238661448648	8.66179242081009	152.26154830386	186.215774593435	0.0778332103843902	0.00179999396996459	0.0743052222032597	0.0813611985655208
3	PreTest, EntryTest, Antigen	6	1.52371798769666	0.773220226370585	0.00820634401031173	3.03922963138301	35.812065999252	3.06592367251236	29.8028556011278	41.8212763973763	37.3357839869487	3.44361739910617	30.5862938847006	44.0852740891968	0.0762155219495961	0.00177633616218194	0.0727339030717195	0.0796971408274727
3	PreTest, EntryTest, Antigen	7	0.228308973440303	0.303392351326607	-0.366340035159847	0.822957982040452	7.42593515263067	1.17464970039102	5.12362173986427	9.72824856539706	7.65424412607097	1.32995113998597	5.04753989169848	10.2609483604435	0.0759536770703275	0.00178318155696318	0.0724586412186797	0.0794487129219754
3	PreTest, EntryTest, Antigen	8	0.0345199412194443	0.118956024484977	-0.198633866771111	0.267673749209999	1.47855622218011	0.469747873138982	0.557850390827705	2.39926205353251	1.51307616339955	0.531858839105986	0.470632838751821	2.55551948804729	0.0757594361436483	0.00178165299710429	0.0722673962693239	0.0792514760179727
3	PreTest, EntryTest, Antigen	9	0.00497707750064322	0.0447809043696273	-0.0827934950638262	0.0927476500651127	0.289195408967851	0.197417643388437	-0.0977431720734857	0.676133990009188	0.294172486468494	0.223248778625199	-0.143395119636896	0.731740092573885	0.0726710390969758	0.00176006371472179	0.0692213142161211	0.0761207639778305
3	PreTest, EntryTest, Antigen	10	0.00111280303021881	0.0179285781234389	-0.0340272100917214	0.036252816152159	0.0579957811979396	0.0904608963556902	-0.119307575659213	0.235299138055092	0.0591085842281584	0.102377328431296	-0.141550979497182	0.259768147953499	0.0558446278041607	0.00153959349517511	0.0528270245536174	0.0588622310547039
3	PreTest, EntryTest, Antigen	11	0.000528096758745934	0.0120326806719667	-0.0230559573583087	0.0241121508758006	0.0120789135261575	0.0432082462013675	-0.0726092490285229	0.0967670760808379	0.0126070102849034	0.0520797093237801	-0.0894692199897055	0.114683240559512	0.0278407886279742	0.00110788403300295	0.0256693359232884	0.03001224133266
3	PreTest, EntryTest, Antigen	12	0	0	0	0	0.00188009836910414	0.0076000752276298	-0.0130160490770503	0.0167762458152585	0.00188009836910414	0.0076000752276298	-0.0130160490770503	0.0167762458152585	0.00853274268528457	0.000634289083404068	0.00728953608181259	0.00977594928875654
3	PreTest, EntryTest, Antigen	13	0	0	0	0	0.000278681677946789	0.00115670037036694	-0.00198845104797242	0.002545814403866	0.000278681677946789	0.00115670037036694	-0.00198845104797242	0.002545814403866	0.0017661413813385	0.000274321515433082	0.00122847121108965	0.00230381155158734
3	PreTest, EntryTest, Antigen	14	0	0	0	0	3.68479713735413e-05	0.000159285188182599	-0.000275350997464353	0.000349046940211436	3.68479713735413e-05	0.000159285188182599	-0.000275350997464353	0.000349046940211436	0.000279709492456699	0.000112629392219618	5.89558837062484e-05	0.00050046310120715
3	PreTest, EntryTest, Antigen	15	0	0	0	0	4.49073208726355e-06	2.26206127095326e-05	-3.98456688234203e-05	4.88271329979474e-05	4.49073208726355e-06	2.26206127095326e-05	-3.98456688234203e-05	4.88271329979474e-05	3.68982466819343e-05	4.25659204228418e-05	-4.65309573468357e-05	0.000120327450710704
3	PreTest, EntryTest, Antigen	16	0	0	0	0	5.59524431271625e-07	3.57652370827435e-06	-6.45046203694611e-06	7.56951089948936e-06	5.59524431271625e-07	3.57652370827435e-06	-6.45046203694611e-06	7.56951089948936e-06	5.52646752583028e-06	1.57647662244657e-05	-2.53724742741226e-05	3.64254093257831e-05
3	PreTest, EntryTest, Antigen	17	0	0	0	0	6.69675318146828e-08	7.0457446047518e-07	-1.31399841071667e-06	1.44793347434604e-06	6.69675318146828e-08	7.0457446047518e-07	-1.31399841071667e-06	1.44793347434604e-06	7.56701142072652e-07	5.93734876309099e-06	-1.08805024335857e-05	1.2393904717731e-05
3	PreTest, EntryTest, Antigen	18	0	0	0	0	7.56817810325829e-09	1.74196785496628e-07	-3.33857521470132e-07	3.48993877676649e-07	7.56817810325829e-09	1.74196785496628e-07	-3.33857521470132e-07	3.48993877676649e-07	9.4609091491782e-08	2.11455884174413e-06	-4.04992623832671e-06	4.23914442131028e-06
3	PreTest, EntryTest, Antigen	19	0	0	0	0	1.65870317917713e-09	5.24528000836211e-08	-1.0114878498472e-07	1.04466191343075e-07	1.65870317917713e-09	5.24528000836211e-08	-1.0114878498472e-07	1.04466191343075e-07	4.68581603486247e-08	1.48178513667044e-06	-2.85744070752543e-06	2.95115702822268e-06
3	PreTest, EntryTest, Antigen	20	0	0	0	0	0	0	0	0	0	0	0	0	0	0	0	0
3	PreTest, EntryTest, Antigen	21	0	0	0	0	0	0	0	0	0	0	0	0	0	0	0	0
4	PreTest, EntryTest, PCR 1D	0	1523.70951862004	32.9455066798114	1459.13632552761	1588.28271171247	3469.57912819078	54.5572161842863	3362.64698446958	3576.51127191198	4993.28864681082	70.9300362551337	4854.26577575076	5132.31151787089	0.260367363816908	0.00303027314275307	0.254428028457112	0.266306699176704
4	PreTest, EntryTest, PCR 1D	1	1426.54663169172	31.560618854658	1364.68781873659	1488.40544464685	3466.64820612717	54.5401550715818	3359.74950218687	3573.54691006747	4893.19483781889	70.5157954121611	4754.98387881105	5031.40579682673	0.230636010218037	0.00289657977149199	0.224958713865913	0.236313306570161
4	PreTest, EntryTest, PCR 1D	2	973.610827724258	23.9793503029031	926.611301130568	1020.61035431795	3113.17146157061	51.0645504651058	3013.084942659	3213.25798048222	4086.78228929487	63.8483664071478	3961.63949113686	4211.92508745288	0.190179677216086	0.00266389930129212	0.184958434585554	0.195400919846619
4	PreTest, EntryTest, PCR 1D	3	369.539600814218	13.3266515258096	343.419363823631	395.659837804805	1764.98661322632	36.0588096498712	1694.31134631258	1835.66188014007	2134.52621404054	43.2985035206169	2049.66114714013	2219.39128094095	0.130417291446346	0.00228165804921127	0.125945241669892	0.1348893412228
4	PreTest, EntryTest, PCR 1D	4	73.1495397324656	5.82519555097012	61.7321564525642	84.5669230123671	602.225706475186	19.0356705000087	564.915792295169	639.535620655203	675.375246207652	22.271380209974	631.723340996103	719.027151419201	0.0949932807826939	0.00196914897670661	0.091133748788349	0.0988528127770389
4	PreTest, EntryTest, PCR 1D	5	10.85157187106	2.06662489296313	6.80098708085226	14.9021566612677	157.864315661253	7.66469228363146	142.841518785336	172.887112537171	168.715887532313	8.65116018670037	151.759613566381	185.672161498246	0.0865460222762755	0.00184670729229995	0.0829264759833676	0.0901655685691834
4	PreTest, EntryTest, PCR 1D	6	1.507678626257	0.768280482580012	0.00184888040018016	3.01350837211383	35.6542482917049	3.03860015809041	29.6985919818478	41.6099046015621	37.161926917962	3.41300846415059	30.4724303282268	43.8514235076971	0.0851367736807081	0.00182199900579466	0.0815656556293506	0.0887078917320657
4	PreTest, EntryTest, PCR 1D	7	0.226323049341084	0.300939446900125	-0.363518266583161	0.81616436526533	7.38624290624421	1.17500794337314	5.08322733723286	9.68925847525557	7.6125659555853	1.33010001079696	5.00556993442325	10.2195619767473	0.0849109344077517	0.00182540017502005	0.0813331500647124	0.0884887187507909
4	PreTest, EntryTest, PCR 1D	8	0.0345199412194443	0.118956024484977	-0.198633866771111	0.267673749209999	1.47039084652893	0.470345681420634	0.548513310944483	2.39226838211337	1.50491078774837	0.532621832840601	0.460971995380792	2.54884958011595	0.0844748309553561	0.00182356538261683	0.0809006428054271	0.0880490191052851
4	PreTest, EntryTest, PCR 1D	9	0.00497707750064322	0.0447809043696273	-0.0827934950638262	0.0927476500651127	0.287680540523354	0.197594865842576	-0.0996053965280944	0.674966477574803	0.292657618023998	0.223456282640017	-0.145316695950436	0.730631931998431	0.0791237471078627	0.00177319117764726	0.0756482923996741	0.0825992018160514
4	PreTest, EntryTest, PCR 1D	10	0.00111280303021881	0.0179285781234389	-0.0340272100917214	0.036252816152159	0.0577097939412408	0.0904941814579217	-0.119658801716286	0.235078389598767	0.0588225969714596	0.102410673956497	-0.141902323983275	0.259547517926194	0.0583276734550434	0.00154019952668796	0.055308882382735	0.0613464645273518
4	PreTest, EntryTest, PCR 1D	11	0.000528096758745934	0.0120326806719667	-0.0230559573583087	0.0241121508758006	0.012008426981611	0.0432121580394423	-0.0726874027756959	0.0967042567389179	0.0125365237403569	0.0520830494259199	-0.0895462531344461	0.11461930061516	0.0281652993790989	0.00111788813320767	0.0259742386380119	0.0303563601201859
4	PreTest, EntryTest, PCR 1D	12	0	0	0	0	0.00186341299467725	0.0076006554350339	-0.0130338716579892	0.0167606976473437	0.00186341299467725	0.0076006554350339	-0.0130338716579892	0.0167606976473437	0.00849157970944993	0.000637053487974491	0.00724295487301993	0.00974020454587993
4	PreTest, EntryTest, PCR 1D	13	0	0	0	0	0.000275469230831014	0.00115675530147813	-0.00199177116006613	0.00254270962172816	0.000275469230831014	0.00115675530147813	-0.00199177116006613	0.00254270962172816	0.00174212907860826	0.000273275778717079	0.00120650855232278	0.00227774960489373
4	PreTest, EntryTest, PCR 1D	14	0	0	0	0	3.63094983940576e-05	0.000159177747843673	-0.000275678887379541	0.000348297884167656	3.63094983940576e-05	0.000159177747843673	-0.000275678887379541	0.000348297884167656	0.000276453235654218	0.00011222286147041	5.6496427172214e-05	0.000496410044136222
4	PreTest, EntryTest, PCR 1D	15	0	0	0	0	4.36158247936689e-06	2.24751245771599e-05	-3.96896616918664e-05	4.84128266506002e-05	4.36158247936689e-06	2.24751245771599e-05	-3.96896616918664e-05	4.84128266506002e-05	3.60936306194191e-05	4.21721364597578e-05	-4.65637568417061e-05	0.000118751018080544
4	PreTest, EntryTest, PCR 1D	16	0	0	0	0	5.20715838973483e-07	3.42875736028519e-06	-6.19964858718548e-06	7.24108026513245e-06	5.20715838973483e-07	3.42875736028519e-06	-6.19964858718548e-06	7.24108026513245e-06	5.33668851110353e-06	1.55427732314418e-05	-2.51271470225223e-05	3.58005240447294e-05
4	PreTest, EntryTest, PCR 1D	17	0	0	0	0	5.44234453907864e-08	5.8347049428416e-07	-1.08917872340617e-06	1.19802561418774e-06	5.44234453907864e-08	5.8347049428416e-07	-1.08917872340617e-06	1.19802561418774e-06	7.09842981724027e-07	5.75525964716654e-06	-1.05704659267224e-05	1.19901518901705e-05
4	PreTest, EntryTest, PCR 1D	18	0	0	0	0	2.85328483597359e-09	9.02287889489647e-08	-1.73995141503997e-07	1.79701711175944e-07	2.85328483597359e-09	9.02287889489647e-08	-1.73995141503997e-07	1.79701711175944e-07	4.77509311431573e-08	1.51001702806245e-06	-2.91188244385924e-06	3.00738430614556e-06
4	PreTest, EntryTest, PCR 1D	19	0	0	0	0	0	0	0	0	0	0	0	0	0	0	0	0
4	PreTest, EntryTest, PCR 1D	20	0	0	0	0	0	0	0	0	0	0	0	0	0	0	0	0
4	PreTest, EntryTest, PCR 1D	21	0	0	0	0	0	0	0	0	0	0	0	0	0	0	0	0
5	PreTest, EntryTest, PCR 2D	0	1630.22165012274	33.7603829062971	1564.0512996264	1696.39200061908	3722.80155275539	56.9081962207062	3611.2614881628	3834.34161734797	5353.02320287813	72.8240402932687	5210.28808390332	5495.75832185294	0.257405687351024	0.00296949840594587	0.25158547047537	0.263225904226678
5	PreTest, EntryTest, PCR 2D	1	1520.56560046396	32.055846752093	1457.73614082986	1583.39506009807	3712.72174634912	56.6420327068357	3601.70336224373	3823.74013045452	5233.28734681309	72.041186606122	5092.08662106509	5374.48807256109	0.235730973699885	0.00285305954055769	0.230138977000392	0.241322970399378
5	PreTest, EntryTest, PCR 2D	2	1035.40276746686	24.5647568449124	987.25584405083	1083.54969088289	3313.97642117568	52.4083803594242	3211.25599567121	3416.69684668015	4349.37918864254	65.1437425691856	4221.69745320694	4477.06092407814	0.198704481793161	0.0026926149484973	0.193426956494106	0.203982007092215
5	PreTest, EntryTest, PCR 2D	3	394.222167131715	13.8453109730136	367.085357624608	421.358976638822	1879.87354594624	37.2044304089447	1806.95286234471	1952.79422954777	2274.09571307796	44.4451824901558	2186.98315539725	2361.20827075866	0.138322760134582	0.00231597275413654	0.133783453536474	0.142862066732689
5	PreTest, EntryTest, PCR 2D	4	78.1655339396661	6.05779037456174	66.2922648055251	90.0388030738072	641.903119816949	19.6336820909355	603.421102918715	680.385136715182	720.068653756615	22.9481278525045	675.090323165706	765.046984347524	0.10161938374694	0.00205790527450081	0.0975858894089186	0.105652878084962
5	PreTest, EntryTest, PCR 2D	5	11.655258305112	2.18368505418154	7.37523559891621	15.9352810113079	168.521176186369	7.95720038162386	152.925063438386	184.117288934352	180.176434491481	9.00195062403789	162.532611268367	197.820257714595	0.09289779146656	0.00192913072240857	0.0891166952506392	0.0966788876824808
5	PreTest, EntryTest, PCR 2D	6	1.62113720147038	0.818409317738289	0.0170549387033365	3.22521946423743	38.0282460693736	3.17419790271979	31.8068181800428	44.2496739587044	39.649383270844	3.57927044735933	32.6340131940197	46.6647533476683	0.0914487098694714	0.00191458029161786	0.0876961324979004	0.0952012872410424
5	PreTest, EntryTest, PCR 2D	7	0.244015675018353	0.316616992778092	-0.376553630826707	0.864584980863413	7.87480535782603	1.20713420723074	5.50882231165379	10.2407884039983	8.11882103284438	1.36993967399324	5.43373927181762	10.8039027938711	0.0911650681719607	0.00192005954904438	0.0874017514558337	0.0949283848880877
5	PreTest, EntryTest, PCR 2D	8	0.0332376092900918	0.119114168530957	-0.200226161030584	0.266701379610767	1.55645203195757	0.474200202556717	0.627019634946408	2.48588442896874	1.58968964124766	0.538431675455607	0.534363557354674	2.64501572514065	0.0905204421668859	0.0019174626331698	0.0867622154058731	0.0942786689278987
5	PreTest, EntryTest, PCR 2D	9	0.00536005413672885	0.0472263078606717	-0.0872035092701877	0.0979236175436454	0.302916087472454	0.194813997324459	-0.0789193472834855	0.684751522228393	0.308276141609182	0.222758536630074	-0.128330590185763	0.744882873404128	0.0844017966504427	0.00184515964432229	0.080785283747571	0.0880183095533144
5	PreTest, EntryTest, PCR 2D	10	0.00111280303021881	0.0179285781234389	-0.0340272100917214	0.036252816152159	0.0602458135825897	0.0899182429450596	-0.115993942589727	0.236485569754907	0.0613586166128085	0.101898070969701	-0.138361602487805	0.261078835713422	0.062041842358133	0.00158621683993415	0.058932857351862	0.0651508273644039
5	PreTest, EntryTest, PCR 2D	11	0.000528096758745934	0.0120326806719667	-0.0230559573583087	0.0241121508758006	0.0124662956749315	0.0431754216652971	-0.0721575307890509	0.0970901221389138	0.0129943924336774	0.0520538333538073	-0.0890311209397849	0.11501990580714	0.0299561476402739	0.00113817983918334	0.0277253151554745	0.0321869801250732
5	PreTest, EntryTest, PCR 2D	12	0	0	0	0	0.0019416754709211	0.00759459180335492	-0.0129437244636545	0.0168270754054967	0.0019416754709211	0.00759459180335492	-0.0129437244636545	0.0168270754054967	0.00904580830249771	0.000659991690995675	0.00775222458814619	0.0103393920168492
5	PreTest, EntryTest, PCR 2D	13	0	0	0	0	0.000287197126204873	0.00115593606046134	-0.00197843755229935	0.0025528318047091	0.000287197126204873	0.00115593606046134	-0.00197843755229935	0.0025528318047091	0.00185762704320299	0.000284934246538014	0.00129915591998848	0.0024160981664175
5	PreTest, EntryTest, PCR 2D	14	0	0	0	0	3.78971915396752e-05	0.000159232542919241	-0.000274198592582037	0.000349992975661387	3.78971915396752e-05	0.000159232542919241	-0.000274198592582037	0.000349992975661387	0.000294833709317327	0.000114379422770984	7.06500406861987e-05	0.000519017377948455
5	PreTest, EntryTest, PCR 2D	15	0	0	0	0	4.61192961121483e-06	2.26668770977779e-05	-3.98151495004298e-05	4.90390087228594e-05	4.61192961121483e-06	2.26668770977779e-05	-3.98151495004298e-05	4.90390087228594e-05	3.85045965400869e-05	4.30323228222217e-05	-4.58387561914676e-05	0.000122847949271641
5	PreTest, EntryTest, PCR 2D	16	0	0	0	0	5.79795172046004e-07	3.62262283540058e-06	-6.52054558533912e-06	7.68013592943113e-06	5.79795172046004e-07	3.62262283540058e-06	-6.52054558533912e-06	7.68013592943113e-06	5.66924015490218e-06	1.60668421042507e-05	-2.58217703694291e-05	3.71602506792335e-05
5	PreTest, EntryTest, PCR 2D	17	0	0	0	0	7.30659673056068e-08	7.29930458217342e-07	-1.35759773080038e-06	1.5037296654116e-06	7.30659673056068e-08	7.29930458217342e-07	-1.35759773080038e-06	1.5037296654116e-06	8.03658317129e-07	6.1144051543573e-06	-1.11805757854113e-05	1.27878924196693e-05
5	PreTest, EntryTest, PCR 2D	18	0	0	0	0	9.66163266374838e-09	1.86266886700971e-07	-3.55421465270154e-07	3.74744730597651e-07	9.66163266374838e-09	1.86266886700971e-07	-3.55421465270154e-07	3.74744730597651e-07	1.41566266548131e-07	2.58213890778232e-06	-4.91942599270521e-06	5.20255852580147e-06
5	PreTest, EntryTest, PCR 2D	19	0	0	0	0	1.65870317917713e-09	5.24528000836211e-08	-1.0114878498472e-07	1.04466191343075e-07	1.65870317917713e-09	5.24528000836211e-08	-1.0114878498472e-07	1.04466191343075e-07	4.68581603486247e-08	1.48178513667044e-06	-2.85744070752543e-06	2.95115702822268e-06
5	PreTest, EntryTest, PCR 2D	20	0	0	0	0	0	0	0	0	0	0	0	0	0	0	0	0
5	PreTest, EntryTest, PCR 2D	21	0	0	0	0	0	0	0	0	0	0	0	0	0	0	0	0
6	PreTest, EntryTest, ExitTest, PCR 0D	0	1224.78224418244	29.443809111947	1167.07237832302	1282.49211004186	2785.05227896923	49.810256691039	2687.42417585479	2882.68038208366	4009.83452315167	64.3501420982399	3883.70824463912	4135.96080166422	0.240174062851818	0.00290668265993468	0.234476964838346	0.24587116086529
6	PreTest, EntryTest, ExitTest, PCR 0D	1	448.452009242722	17.6073554472144	413.941592566182	482.962425919262	1028.19279103524	29.4749297394741	970.421928745871	1085.96365332461	1476.64480027796	38.0654596814185	1402.03649930238	1551.25310125354	0.0853582071967772	0.00187870024986034	0.0816759547070509	0.0890404596865035
6	PreTest, EntryTest, ExitTest, PCR 0D	2	72.2254986044964	7.1282412335514	58.2541457867357	86.1968514222572	176.704834745822	12.4518094479554	152.29928822783	201.110381263815	248.930333350319	15.8066536571893	217.949292182228	279.91137451841	0.0205343855482644	0.000969751720458341	0.0186336721761661	0.0224350989203628
6	PreTest, EntryTest, ExitTest, PCR 0D	3	8.85038851359709	2.35999888041106	4.22479070799141	13.4759863192028	29.9430054465769	5.09958561712032	19.947817637021	39.9381932561327	38.7933939601739	6.31041824906405	26.4249741920084	51.1618137283395	0.00539246715730753	0.000500451500753351	0.00441158221583096	0.0063733520987841
6	PreTest, EntryTest, ExitTest, PCR 0D	4	1.09206345996151	0.774286151857759	-0.425537397679699	2.60966431760272	8.93211557140234	2.24341463613508	4.53502288457759	13.3292082582271	10.0241790313639	2.62133762620175	4.88635728400843	15.1620007787193	0.00282686210315691	0.000357522183806931	0.00212611862289532	0.00352760558341849
6	PreTest, EntryTest, ExitTest, PCR 0D	5	0.139560506586901	0.28142176280472	-0.412026148510351	0.691147161684152	3.38000364496934	0.91638771984303	1.583883714077	5.17612357586168	3.51956415155624	1.03958538623337	1.48197679453883	5.55715150857365	0.00390086660921616	0.000427261103160441	0.0030634348470217	0.00473829837141063
6	PreTest, EntryTest, ExitTest, PCR 0D	6	0.0151247796383427	0.087569871833771	-0.156512169155848	0.186761728432534	1.27008388528272	0.364247921969429	0.556157958222642	1.9840098123428	1.28520866492107	0.398789332773238	0.503581572685519	2.06683575715661	0.00734370226998415	0.000570687501901374	0.00622515476625746	0.00846224977371084
6	PreTest, EntryTest, ExitTest, PCR 0D	7	0.00394237062238703	0.0556839520212497	-0.105198175339262	0.113082916584036	0.443910465371128	0.14208569381591	0.165422505491945	0.722398425250311	0.447852835993515	0.164799630699329	0.124845559822829	0.7708601121642	0.0136102680444873	0.000800097999911554	0.0120420759646606	0.0151784601243139
6	PreTest, EntryTest, ExitTest, PCR 0D	8	0	0	0	0	0.1460096392274	0.0469440171412805	0.0539993656304903	0.23801991282431	0.1460096392274	0.0469440171412805	0.0539993656304903	0.23801991282431	0.0228814372993234	0.00100687337222703	0.0209079654897585	0.0248549091088884
6	PreTest, EntryTest, ExitTest, PCR 0D	9	0	0	0	0	0.0470487433489587	0.0449077092675591	-0.0409703668154571	0.135067853513375	0.0470487433489587	0.0449077092675591	-0.0409703668154571	0.135067853513375	0.032145468414623	0.00119178131630714	0.0298095770346611	0.034481359794585
6	PreTest, EntryTest, ExitTest, PCR 0D	10	0	0	0	0	0.0129283223844667	0.00356769538623491	0.00593563942744628	0.0199210053414871	0.0129283223844667	0.00356769538623491	0.00593563942744628	0.0199210053414871	0.0308350872770494	0.00120309109520656	0.0284770287304445	0.0331931458236542
6	PreTest, EntryTest, ExitTest, PCR 0D	11	0	0	0	0	0.00330270943365851	0.00126351641805589	0.000826217254268959	0.00577920161304806	0.00330270943365851	0.00126351641805589	0.000826217254268959	0.00577920161304806	0.0171305688648282	0.000881443138949644	0.0154029403124869	0.0188581974171695
6	PreTest, EntryTest, ExitTest, PCR 0D	12	0	0	0	0	0.000678224489434902	0.000279608724323719	0.000130191389760414	0.00122625758910939	0.000678224489434902	0.000279608724323719	0.000130191389760414	0.00122625758910939	0.00553529868442625	0.000520876231152012	0.0045143812713683	0.00655621609748419
6	PreTest, EntryTest, ExitTest, PCR 0D	13	0	0	0	0	0.000113798734065231	8.31675761029175e-05	-4.92097150964872e-05	0.000276807183226949	0.000113798734065231	8.31675761029175e-05	-4.92097150964872e-05	0.000276807183226949	0.00117155416128006	0.000219898533160729	0.000740553036285026	0.00160255528627508
6	PreTest, EntryTest, ExitTest, PCR 0D	14	0	0	0	0	1.58399012373692e-05	1.77084343439323e-05	-1.88686300767381e-05	5.05484325514764e-05	1.58399012373692e-05	1.77084343439323e-05	-1.88686300767381e-05	5.05484325514764e-05	0.000189311714648115	9.20428809060783e-05	8.90766807220192e-06	0.000369715761224029
6	PreTest, EntryTest, ExitTest, PCR 0D	15	0	0	0	0	2.04725020091401e-06	9.9579022459334e-06	-1.74702382011155e-05	2.15647386029435e-05	2.04725020091401e-06	9.9579022459334e-06	-1.74702382011155e-05	2.15647386029435e-05	2.44782401759022e-05	3.42894198465804e-05	-4.27290227233954e-05	9.16855030751999e-05
6	PreTest, EntryTest, ExitTest, PCR 0D	16	0	0	0	0	3.10472439334691e-07	2.90441108971901e-06	-5.38217329651457e-06	6.00311817518395e-06	3.10472439334691e-07	2.90441108971901e-06	-5.38217329651457e-06	6.00311817518395e-06	3.49220919938852e-06	1.28893688395611e-05	-2.17709537261513e-05	2.87553721249284e-05
6	PreTest, EntryTest, ExitTest, PCR 0D	17	0	0	0	0	4.19578083576212e-08	5.32237753083998e-07	-1.00122818768702e-06	1.08514380440226e-06	4.19578083576212e-08	5.32237753083998e-07	-1.00122818768702e-06	1.08514380440226e-06	5.68776198895646e-07	5.1636508272917e-06	-9.55197942259608e-06	1.06895318203874e-05
6	PreTest, EntryTest, ExitTest, PCR 0D	18	0	0	0	0	2.85328483597359e-09	9.02287889489647e-08	-1.73995141503997e-07	1.79701711175944e-07	2.85328483597359e-09	9.02287889489647e-08	-1.73995141503997e-07	1.79701711175944e-07	4.77509311431573e-08	1.51001702806245e-06	-2.91188244385924e-06	3.00738430614556e-06
6	PreTest, EntryTest, ExitTest, PCR 0D	19	0	0	0	0	0	0	0	0	0	0	0	0	0	0	0	0
6	PreTest, EntryTest, ExitTest, PCR 0D	20	0	0	0	0	0	0	0	0	0	0	0	0	0	0	0	0
6	PreTest, EntryTest, ExitTest, PCR 0D	21	0	0	0	0	0	0	0	0	0	0	0	0	0	0	0	0
7	PreTest, EntryTest, ExitTest, Antigen	0	1362.85149894509	30.8633381705941	1302.35935613073	1423.34364175946	3103.3532901435	53.0642279476689	2999.34740336607	3207.35917692093	4466.20478908859	68.3920194616923	4332.15643094368	4600.25314723351	0.2771377902328	0.00309253107533759	0.271076429325138	0.283199151140462
7	PreTest, EntryTest, ExitTest, Antigen	1	609.43923026321	19.9633706666691	570.311023756539	648.567436769882	1397.77980832249	35.2493182370462	1328.69114457788	1466.8684720671	2007.2190385857	44.7967408982524	1919.41742642512	2095.02065074627	0.121226807922731	0.00216042959550564	0.11699236591554	0.125461249929922
7	PreTest, EntryTest, ExitTest, Antigen	2	100.07031279324	8.38368432417642	83.638291517854	116.502334068626	243.497513973671	15.0825463839279	213.935723061172	273.05930488617	343.567826766911	19.0930816046956	306.145386821708	380.990266712114	0.0308408010543459	0.00117978351238596	0.0285284253700694	0.0331531767386224
7	PreTest, EntryTest, ExitTest, Antigen	3	10.7773617833768	2.6634009068442	5.55709600596217	15.9976275607914	35.1726382439573	5.53447187295078	24.3250733729738	46.0202031149408	45.9500000273341	6.85519161336592	32.5138244651369	59.3861755895313	0.00781719417602542	0.00061435456614641	0.00661305922637845	0.00902132912567238
7	PreTest, EntryTest, ExitTest, Antigen	4	1.22416092211756	0.831402715179295	-0.405388399633855	2.85371024386898	9.86982279098163	2.32538408435848	5.31206998563901	14.4275755963243	11.0939837130992	2.70860366413689	5.78512053139089	16.4028468948075	0.00376192811565454	0.000408842771208054	0.00296059628408675	0.00456325994722233
7	PreTest, EntryTest, ExitTest, Antigen	5	0.151435556387074	0.300805953605118	-0.438144112678957	0.741015225453105	3.95979261579139	0.953363785600094	2.0911995960152	5.82838563556757	4.11122817217846	1.08892557524759	1.97693404469319	6.24552229966374	0.00538914952740245	0.000509509690563514	0.00439051053389796	0.00638778852090693
7	PreTest, EntryTest, ExitTest, Antigen	6	0.0169408582329313	0.0941581360170807	-0.167609088360547	0.201490804826409	1.61067428191992	0.387902269037332	0.850385834606752	2.37096272923309	1.62761514015285	0.428768485547933	0.787228908478905	2.4680013718268	0.0109243737824753	0.000682087168176681	0.00958748293284902	0.0122612646321016
7	PreTest, EntryTest, ExitTest, Antigen	7	0.00414454925209955	0.0560355511181506	-0.105685130939476	0.113974229443675	0.606181430661721	0.149635203476306	0.312896431848162	0.899466429475281	0.610325979913821	0.172079490455631	0.273050178620783	0.947601781206858	0.0209378391763196	0.000996907514585222	0.0189839004477325	0.0228917779049066
7	PreTest, EntryTest, ExitTest, Antigen	8	0	0	0	0	0.208290488731089	0.0415529150578577	0.126846775217687	0.28973420224449	0.208290488731089	0.0415529150578577	0.126846775217687	0.28973420224449	0.0345757236055953	0.0012384531406617	0.0321483554498984	0.0370030917612923
7	PreTest, EntryTest, ExitTest, Antigen	9	0	0	0	0	0.0677762312017048	0.0450922116892502	-0.0206045037092255	0.156156966112635	0.0677762312017048	0.0450922116892502	-0.0206045037092255	0.156156966112635	0.0460376555522178	0.00144282940693283	0.0432097099146294	0.0488656011898061
7	PreTest, EntryTest, ExitTest, Antigen	10	0	0	0	0	0.0183964583989024	0.0038734018979514	0.0108045906789176	0.0259883261188871	0.0183964583989024	0.0038734018979514	0.0108045906789176	0.0259883261188871	0.0417260402977451	0.00140164872939674	0.0389788087881275	0.0444732718073627
7	PreTest, EntryTest, ExitTest, Antigen	11	0	0	0	0	0.00455701278237048	0.00139853093224318	0.00181589215517384	0.00729813340956712	0.00455701278237048	0.00139853093224318	0.00181589215517384	0.00729813340956712	0.0223692177791291	0.00100629394061912	0.0203968816555157	0.0243415539027426
7	PreTest, EntryTest, ExitTest, Antigen	12	0	0	0	0	0.000907184156470159	0.000303845054273113	0.000311647850094858	0.00150272046284546	0.000907184156470159	0.000303845054273113	0.000311647850094858	0.00150272046284546	0.00707604305380414	0.000580939857534491	0.00593740093303653	0.00821468517457174
7	PreTest, EntryTest, ExitTest, Antigen	13	0	0	0	0	0.000148868299202475	8.89135866189512e-05	-2.54023305706693e-05	0.000323138928975619	0.000148868299202475	8.89135866189512e-05	-2.54023305706693e-05	0.000323138928975619	0.00148154985762475	0.000250804331863982	0.000989973367171348	0.00197312634807816
7	PreTest, EntryTest, ExitTest, Antigen	14	0	0	0	0	2.15786933026249e-05	4.75227464573068e-05	-7.15658897536964e-05	0.000114723276358946	2.15786933026249e-05	4.75227464573068e-05	-7.15658897536964e-05	0.000114723276358946	0.000238742604432948	0.00010392608329188	3.50474811808636e-05	0.000442437727685033
7	PreTest, EntryTest, ExitTest, Antigen	15	0	0	0	0	3.45064232127275e-06	2.08269502781935e-05	-3.73701802239865e-05	4.4271464866532e-05	3.45064232127275e-06	2.08269502781935e-05	-3.73701802239865e-05	4.4271464866532e-05	3.11404476126805e-05	3.84973462009058e-05	-4.43143509410949e-05	0.000106595246166456
7	PreTest, EntryTest, ExitTest, Antigen	16	0	0	0	0	3.74326934107791e-07	2.25499698028743e-06	-4.04546714725557e-06	4.79412101547115e-06	3.74326934107791e-07	2.25499698028743e-06	-4.04546714725557e-06	4.79412101547115e-06	4.48723687105126e-06	1.43312069922919e-05	-2.36019288338409e-05	3.25764025759435e-05
7	PreTest, EntryTest, ExitTest, Antigen	17	0	0	0	0	6.29358194169585e-08	6.93309780494239e-07	-1.29595135035175e-06	1.42182298918567e-06	6.29358194169585e-08	6.93309780494239e-07	-1.29595135035175e-06	1.42182298918567e-06	7.10139704255452e-07	5.75763313270161e-06	-1.05748212358397e-05	1.19951006443506e-05
7	PreTest, EntryTest, ExitTest, Antigen	18	0	0	0	0	7.56817810325829e-09	1.74196785496628e-07	-3.33857521470132e-07	3.48993877676649e-07	7.56817810325829e-09	1.74196785496628e-07	-3.33857521470132e-07	3.48993877676649e-07	9.4609091491782e-08	2.11455884174413e-06	-4.04992623832671e-06	4.23914442131028e-06
7	PreTest, EntryTest, ExitTest, Antigen	19	0	0	0	0	1.65870317917713e-09	5.24528000836211e-08	-1.0114878498472e-07	1.04466191343075e-07	1.65870317917713e-09	5.24528000836211e-08	-1.0114878498472e-07	1.04466191343075e-07	4.68581603486247e-08	1.48178513667044e-06	-2.85744070752543e-06	2.95115702822268e-06
7	PreTest, EntryTest, ExitTest, Antigen	20	0	0	0	0	0	0	0	0	0	0	0	0	0	0	0	0
7	PreTest, EntryTest, ExitTest, Antigen	21	0	0	0	0	0	0	0	0	0	0	0	0	0	0	0	0
8	PreTest, EntryTest, ExitTest, PCR 1D	0	1523.70951862004	32.9455066798114	1459.13632552761	1588.28271171247	3469.57912819078	54.5572161842863	3362.64698446958	3576.51127191198	4993.28864681082	70.9300362551337	4854.26577575076	5132.31151787089	0.260367363816908	0.00303027314275307	0.254428028457112	0.266306699176704
8	PreTest, EntryTest, ExitTest, PCR 1D	1	1426.54663169172	31.560618854658	1364.68781873659	1488.40544464685	3466.64820612717	54.5401550715818	3359.74950218687	3573.54691006747	4893.19483781889	70.5157954121611	4754.98387881105	5031.40579682673	0.230636010218037	0.00289657977149199	0.224958713865913	0.236313306570161
8	PreTest, EntryTest, ExitTest, PCR 1D	2	401.997700907442	16.0744751152482	370.491729681556	433.503672133329	1085.93212908838	30.218134457683	1026.70458555132	1145.15967262544	1487.92982999582	38.4319924722431	1412.60312475023	1563.25653524142	0.0679750599220581	0.00167256474439327	0.0646968330230473	0.0712532868210689
8	PreTest, EntryTest, ExitTest, PCR 1D	3	52.2843566060709	5.34440671726054	41.8093194402402	62.7593937719016	175.919245662165	12.4714450248867	151.475213413387	200.363277910943	228.203602268236	15.2579733081572	198.297974584248	258.109229952224	0.0117062588387541	0.000724358385310235	0.010286516403546	0.0131260012739622
8	PreTest, EntryTest, ExitTest, PCR 1D	4	4.93861862129379	1.66503224213159	1.67515542671588	8.2020818158717	21.1714666234142	4.24039804449622	12.8602864562016	29.4826467906267	26.110085244708	5.1880561572529	15.9414951764923	36.2786753129236	0.00258031373822488	0.000346976564613657	0.00190023967158211	0.00326038780486765
8	PreTest, EntryTest, ExitTest, PCR 1D	5	0.463995733119171	0.464225319808839	-0.445885893706153	1.3738773599445	3.47110341009164	1.41654982992782	0.694665743433102	6.24754107675017	3.93509914321081	1.66173270923443	0.67810303311132	7.1920952533103	0.00268741956032202	0.000352193564508361	0.00199712017388563	0.00337771894675841
8	PreTest, EntryTest, ExitTest, PCR 1D	6	0.0507573017228445	0.155255778911758	-0.253544024944202	0.355058628389891	0.863712702220341	0.467023213194017	-0.0516527956399335	1.77907820008061	0.914470003943185	0.540442447245574	-0.14479719265814	1.97373720054451	0.00523165386226925	0.000489044259086269	0.00427312711446016	0.00619018061007833
8	PreTest, EntryTest, ExitTest, PCR 1D	7	0.00509350391903999	0.0578020897517325	-0.108198591994356	0.118385599832436	0.266992918882537	0.152749916893907	-0.0323969182295209	0.566382755994596	0.272086422801577	0.175204034427979	-0.0713134846772605	0.615486330280415	0.0102542135340646	0.000678938997409421	0.00892349309914213	0.0115849339689871
8	PreTest, EntryTest, ExitTest, PCR 1D	8	0.00301673179182929	0.04893396558124	-0.092893840747401	0.0989273043310596	0.0910035120367642	0.0667761354332251	-0.0398777134123569	0.221884737485885	0.0940202438285934	0.0975966252373961	-0.097269141636703	0.28530962929389	0.0184850783889712	0.000920506177565807	0.0166808862809422	0.0202892704970002
8	PreTest, EntryTest, ExitTest, PCR 1D	9	0	0	0	0	0.0286723463282104	0.0103122708164028	0.00846029552806099	0.0488843971283599	0.0286723463282104	0.0103122708164028	0.00846029552806099	0.0488843971283599	0.0269129675592052	0.0010844751521168	0.0247873962610563	0.0290385388573542
8	PreTest, EntryTest, ExitTest, PCR 1D	10	0	0	0	0	0.00990203580100326	0.0276057487035108	-0.044205231657878	0.0640093032598845	0.00990203580100326	0.0276057487035108	-0.044205231657878	0.0640093032598845	0.0257752823497573	0.00104038329774572	0.0237361310861757	0.0278144336133389
8	PreTest, EntryTest, ExitTest, PCR 1D	11	0	0	0	0	0.00236887666466036	0.00064572133564742	0.00110326284679142	0.00363449048252931	0.00236887666466036	0.00064572133564742	0.00110326284679142	0.00363449048252931	0.0142813318796852	0.000827152133908112	0.0126601136972253	0.0159025500621451
8	PreTest, EntryTest, ExitTest, PCR 1D	12	0	0	0	0	0.000520653406625192	0.000226325492053788	7.70554421997671e-05	0.000964251371050616	0.000520653406625192	0.000226325492053788	7.70554421997671e-05	0.000964251371050616	0.004630936524725	0.000483414168607511	0.00368344475425428	0.00557842829519572
8	PreTest, EntryTest, ExitTest, PCR 1D	13	0	0	0	0	8.87276655777205e-05	5.30375751203282e-05	-1.52259816581228e-05	0.000192681312813564	8.87276655777205e-05	5.30375751203282e-05	-1.52259816581228e-05	0.000192681312813564	0.000987946681211542	0.000202290498886877	0.000591457303393263	0.00138443605902982
8	PreTest, EntryTest, ExitTest, PCR 1D	14	0	0	0	0	1.28398833224343e-05	1.5342207194899e-05	-1.72308427795677e-05	4.29106094244363e-05	1.28398833224343e-05	1.5342207194899e-05	-1.72308427795677e-05	4.29106094244363e-05	0.000160509698175263	8.7561274008059e-05	-1.11103988805324e-05	0.000332129795231059
8	PreTest, EntryTest, ExitTest, PCR 1D	15	0	0	0	0	1.58012994463806e-06	3.62181289187222e-06	-5.5186233234315e-06	8.67888321270761e-06	1.58012994463806e-06	3.62181289187222e-06	-5.5186233234315e-06	8.67888321270761e-06	2.1444799240043e-05	3.14142244422884e-05	-4.01270806668423e-05	8.30166791469283e-05
8	PreTest, EntryTest, ExitTest, PCR 1D	16	0	0	0	0	2.09592167379419e-07	2.03034532009739e-06	-3.76988466001147e-06	4.18906899477031e-06	2.09592167379419e-07	2.03034532009739e-06	-3.76988466001147e-06	4.18906899477031e-06	2.6004505806375e-06	1.09914994947921e-05	-1.89428884291549e-05	2.41437895904299e-05
8	PreTest, EntryTest, ExitTest, PCR 1D	17	0	0	0	0	3.14826446866754e-08	5.03797871662116e-07	-9.55961183771071e-07	1.01892647314442e-06	3.14826446866754e-08	5.03797871662116e-07	-9.55961183771071e-07	1.01892647314442e-06	3.30459490898512e-07	3.93799589094012e-06	-7.38801245534413e-06	8.04893143714115e-06
8	PreTest, EntryTest, ExitTest, PCR 1D	18	0	0	0	0	2.85328483597359e-09	9.02287889489647e-08	-1.73995141503997e-07	1.79701711175944e-07	2.85328483597359e-09	9.02287889489647e-08	-1.73995141503997e-07	1.79701711175944e-07	4.77509311431573e-08	1.51001702806245e-06	-2.91188244385924e-06	3.00738430614556e-06
8	PreTest, EntryTest, ExitTest, PCR 1D	19	0	0	0	0	0	0	0	0	0	0	0	0	0	0	0	0
8	PreTest, EntryTest, ExitTest, PCR 1D	20	0	0	0	0	0	0	0	0	0	0	0	0	0	0	0	0
8	PreTest, EntryTest, ExitTest, PCR 1D	21	0	0	0	0	0	0	0	0	0	0	0	0	0	0	0	0
9	PreTest, EntryTest, ExitTest, PCR 2D	0	1630.22165012274	33.7603829062971	1564.0512996264	1696.39200061908	3722.80155275539	56.9081962207062	3611.2614881628	3834.34161734797	5353.02320287813	72.8240402932687	5210.28808390332	5495.75832185294	0.257405687351024	0.00296949840594587	0.25158547047537	0.263225904226678
9	PreTest, EntryTest, ExitTest, PCR 2D	1	1520.56560046396	32.055846752093	1457.73614082986	1583.39506009807	3712.72174634912	56.6420327068357	3601.70336224373	3823.74013045452	5233.28734681309	72.041186606122	5092.08662106509	5374.48807256109	0.235730973699885	0.00285305954055769	0.230138977000392	0.241322970399378
9	PreTest, EntryTest, ExitTest, PCR 2D	2	1035.40276746686	24.5647568449124	987.25584405083	1083.54969088289	3313.97642117568	52.4083803594242	3211.25599567121	3416.69684668015	4349.37918864254	65.1437425691856	4221.69745320694	4477.06092407814	0.198704481793161	0.0026926149484973	0.193426956494106	0.203982007092215
9	PreTest, EntryTest, ExitTest, PCR 2D	3	218.141577604736	10.3548757121639	197.846021208895	238.437134000577	880.712344714508	27.5938158295398	826.62846568861	934.796223740406	1098.85392231924	33.0108846644499	1034.15258837692	1163.55525626157	0.0536027008502422	0.00151435269395717	0.0506345695700862	0.0565708321303983
9	PreTest, EntryTest, ExitTest, PCR 2D	4	20.3231576956629	3.17824108247614	14.0938051740096	26.5525102173161	101.930597865993	8.83523991442351	84.6135276337229	119.247668098263	122.253755561656	10.5530881004608	101.569702884753	142.937808238559	0.00776819943747644	0.000603650254439791	0.00658504493877445	0.00895135393617843
9	PreTest, EntryTest, ExitTest, PCR 2D	5	1.58371594895193	0.844466563041602	-0.0714385146096099	3.23887041251347	9.55902315920508	2.56917727156586	4.523435706936	14.5946106114742	11.142739108157	2.99376501701083	5.27495967481578	17.0105185414982	0.0020226472756452	0.000308734991924747	0.00141752669147269	0.0026277678598177
9	PreTest, EntryTest, ExitTest, PCR 2D	6	0.13647946498273	0.23582253706301	-0.325732707660769	0.598691637626229	1.17048802577969	0.806224534642571	-0.409712062119751	2.75068811367913	1.30696749076242	0.942999950544445	-0.541312412304695	3.15524739382953	0.0028589170341989	0.00036619583480814	0.00214117319797494	0.00357666087042286
9	PreTest, EntryTest, ExitTest, PCR 2D	7	0.0180967372570728	0.085306336424415	-0.149103682134781	0.185297156648926	0.231666884304386	0.282398815612481	-0.321834794296077	0.785168562904848	0.249763621561458	0.334449750006157	-0.405757888450608	0.905285131573525	0.00573096998777517	0.000509901670830967	0.00473156271294647	0.00673037726260386
9	PreTest, EntryTest, ExitTest, PCR 2D	8	0.00279734729453773	0.0477390333482576	-0.0907711580680472	0.0963658526571227	0.0566467732079871	0.0882581823177477	-0.116339264134798	0.229632810550773	0.0594441205025249	0.112481141370571	-0.161018916583795	0.279907157588844	0.0109219599264307	0.000728105287331636	0.0094948735632607	0.0123490462896007
9	PreTest, EntryTest, ExitTest, PCR 2D	9	0.00142030308206635	0.0297288612525433	-0.0568482649729185	0.0596888711370512	0.0184388330326961	0.0430862056347096	-0.0660101300113347	0.102887796076727	0.0198591361147624	0.0653645163500889	-0.108255315931412	0.147973588160937	0.0170494745992475	0.000856628038718441	0.0153704836433593	0.0187284655551356
9	PreTest, EntryTest, ExitTest, PCR 2D	10	0	0	0	0	0.00583328484871901	0.0101171761806966	-0.0139963804654464	0.0256629501628844	0.00583328484871901	0.0101171761806966	-0.0139963804654464	0.0256629501628844	0.017464757556683	0.000870094552405863	0.0157593722339675	0.0191701428793984
9	PreTest, EntryTest, ExitTest, PCR 2D	11	0	0	0	0	0.00162336063816616	0.00154211457015277	-0.00139918391933328	0.00464590519566559	0.00162336063816616	0.00154211457015277	-0.00139918391933328	0.00464590519566559	0.0102333840441953	0.000678054338764385	0.00890439754021708	0.0115623705481735
9	PreTest, EntryTest, ExitTest, PCR 2D	12	0	0	0	0	0.000361281631223682	0.000142986524010641	8.10280441628253e-05	0.000641535218284538	0.000361281631223682	0.000142986524010641	8.10280441628253e-05	0.000641535218284538	0.00347003705945723	0.000406830722235978	0.00267264884387471	0.00426742527503974
9	PreTest, EntryTest, ExitTest, PCR 2D	13	0	0	0	0	7.06853301967158e-05	0.000127232296140548	-0.000178689970238758	0.000320060630632189	7.06853301967158e-05	0.000127232296140548	-0.000178689970238758	0.000320060630632189	0.000758205037033802	0.00018230195066357	0.000400893213733204	0.0011155168603344
9	PreTest, EntryTest, ExitTest, PCR 2D	14	0	0	0	0	9.60402249868167e-06	1.69315359798464e-05	-2.35817880218172e-05	4.27898330191805e-05	9.60402249868167e-06	1.69315359798464e-05	-2.35817880218172e-05	4.27898330191805e-05	0.000128076315684123	7.64274857204724e-05	-2.17215563280033e-05	0.000277874187696248
9	PreTest, EntryTest, ExitTest, PCR 2D	15	0	0	0	0	1.30570872303244e-06	7.39922432329395e-06	-1.31967709506237e-05	1.58081883966886e-05	1.30570872303244e-06	7.39922432329395e-06	-1.31967709506237e-05	1.58081883966886e-05	1.60649834344149e-05	2.77502460257345e-05	-3.83254987760248e-05	7.04554656448545e-05
9	PreTest, EntryTest, ExitTest, PCR 2D	16	0	0	0	0	2.69624213833258e-07	2.29451085425208e-06	-4.22761706050082e-06	4.76686548816734e-06	2.69624213833258e-07	2.29451085425208e-06	-4.22761706050082e-06	4.76686548816734e-06	2.78770115116187e-06	1.17235916615647e-05	-2.0190538505505e-05	2.57659408078288e-05
9	PreTest, EntryTest, ExitTest, PCR 2D	17	0	0	0	0	4.25776708928586e-08	5.38270514949776e-07	-1.0124325384087e-06	1.09758788019442e-06	4.25776708928586e-08	5.38270514949776e-07	-1.0124325384087e-06	1.09758788019442e-06	4.71311676637485e-07	4.69191837722534e-06	-8.72484834272419e-06	9.66747169599916e-06
9	PreTest, EntryTest, ExitTest, PCR 2D	18	0	0	0	0	7.56817810325829e-09	1.74196785496628e-07	-3.33857521470132e-07	3.48993877676649e-07	7.56817810325829e-09	1.74196785496628e-07	-3.33857521470132e-07	3.48993877676649e-07	9.4609091491782e-08	2.11455884174413e-06	-4.04992623832671e-06	4.23914442131028e-06
9	PreTest, EntryTest, ExitTest, PCR 2D	19	0	0	0	0	0	0	0	0	0	0	0	0	0	0	0	0
9	PreTest, EntryTest, ExitTest, PCR 2D	20	0	0	0	0	0	0	0	0	0	0	0	0	0	0	0	0
9	PreTest, EntryTest, ExitTest, PCR 2D	21	0	0	0	0	0	0	0	0	0	0	0	0	0	0	0	0
10	PreTest, EntryTest, ExitTest, DailyTest, PCR 0D	0	1224.78224418244	29.443809111947	1167.07237832302	1282.49211004186	2785.05227896923	49.810256691039	2687.42417585479	2882.68038208366	4009.83452315167	64.3501420982399	3883.70824463912	4135.96080166422	0.240174062851818	0.00290668265993468	0.234476964838346	0.24587116086529
10	PreTest, EntryTest, ExitTest, DailyTest, PCR 0D	1	233.195094578471	13.1248988541163	207.470292824403	258.919896332539	536.483874703692	21.8590307733567	493.640174387913	579.327575019471	769.678969282163	28.556102204229	713.709008961874	825.648929602452	0.0475796298133801	0.00145863746348325	0.0447207003849529	0.0504385592418073
10	PreTest, EntryTest, ExitTest, DailyTest, PCR 0D	2	8.2078464576323	2.40653566890109	3.49103654658616	12.9246563686784	19.8685784820781	4.2588599284976	11.5212130222228	28.2159439419334	28.0764249397104	5.41660242722861	17.4598841823424	38.6929656970785	0.00465166405746148	0.000470250406488339	0.00372997326074434	0.00557335485417863
10	PreTest, EntryTest, ExitTest, DailyTest, PCR 0D	3	0.145658304537032	0.312775427063646	-0.467381532507714	0.758698141581778	0.354048931325402	0.585986588963086	-0.794484783042246	1.50258264569305	0.499707235862434	0.746582370064944	-0.963594209464856	1.96300868118973	0.000479449884587811	0.000150759036050513	0.000183962173928806	0.000774937595246816
10	PreTest, EntryTest, ExitTest, DailyTest, PCR 0D	4	0.00201061484681841	0.0339879197357881	-0.0646057078353263	0.0686269375289631	0.00675243370998844	0.0801073807319565	-0.150258032524646	0.163762899944623	0.00876304855680686	0.0982527050157161	-0.183812253273997	0.20133835038761	3.25500033298927e-05	3.84573171573009e-05	-4.28263382984171e-05	0.000107926344958202
10	PreTest, EntryTest, ExitTest, DailyTest, PCR 0D	5	0	0	0	0	8.1333314560047e-08	5.08901528004392e-07	-9.1611368032856e-07	1.07878030944865e-06	8.1333314560047e-08	5.08901528004392e-07	-9.1611368032856e-07	1.07878030944865e-06	1.41844274765449e-06	8.06974340001229e-06	-1.43982543163696e-05	1.72351398116786e-05
10	PreTest, EntryTest, ExitTest, DailyTest, PCR 0D	6	0	0	0	0	2.71704916390452e-09	8.59206387259443e-08	-1.65687402738946e-07	1.71121501066755e-07	2.71704916390452e-09	8.59206387259443e-08	-1.65687402738946e-07	1.71121501066755e-07	4.739336492891e-08	1.49870979154899e-06	-2.89007782650712e-06	2.98486455636494e-06
10	PreTest, EntryTest, ExitTest, DailyTest, PCR 0D	7	0	0	0	0	0	0	0	0	0	0	0	0	0	0	0	0
10	PreTest, EntryTest, ExitTest, DailyTest, PCR 0D	8	0	0	0	0	0	0	0	0	0	0	0	0	0	0	0	0
10	PreTest, EntryTest, ExitTest, DailyTest, PCR 0D	9	0	0	0	0	0	0	0	0	0	0	0	0	0	0	0	0
10	PreTest, EntryTest, ExitTest, DailyTest, PCR 0D	10	0	0	0	0	0	0	0	0	0	0	0	0	0	0	0	0
10	PreTest, EntryTest, ExitTest, DailyTest, PCR 0D	11	0	0	0	0	0	0	0	0	0	0	0	0	0	0	0	0
10	PreTest, EntryTest, ExitTest, DailyTest, PCR 0D	12	0	0	0	0	0	0	0	0	0	0	0	0	0	0	0	0
10	PreTest, EntryTest, ExitTest, DailyTest, PCR 0D	13	0	0	0	0	0	0	0	0	0	0	0	0	0	0	0	0
10	PreTest, EntryTest, ExitTest, DailyTest, PCR 0D	14	0	0	0	0	0	0	0	0	0	0	0	0	0	0	0	0
10	PreTest, EntryTest, ExitTest, DailyTest, PCR 0D	15	0	0	0	0	0	0	0	0	0	0	0	0	0	0	0	0
10	PreTest, EntryTest, ExitTest, DailyTest, PCR 0D	16	0	0	0	0	0	0	0	0	0	0	0	0	0	0	0	0
10	PreTest, EntryTest, ExitTest, DailyTest, PCR 0D	17	0	0	0	0	0	0	0	0	0	0	0	0	0	0	0	0
10	PreTest, EntryTest, ExitTest, DailyTest, PCR 0D	18	0	0	0	0	0	0	0	0	0	0	0	0	0	0	0	0
10	PreTest, EntryTest, ExitTest, DailyTest, PCR 0D	19	0	0	0	0	0	0	0	0	0	0	0	0	0	0	0	0
10	PreTest, EntryTest, ExitTest, DailyTest, PCR 0D	20	0	0	0	0	0	0	0	0	0	0	0	0	0	0	0	0
10	PreTest, EntryTest, ExitTest, DailyTest, PCR 0D	21	0	0	0	0	0	0	0	0	0	0	0	0	0	0	0	0
11	PreTest, EntryTest, ExitTest, DailyTest, Antigen	0	1362.85149894509	30.8633381705941	1302.35935613073	1423.34364175946	3103.3532901435	53.0642279476689	2999.34740336607	3207.35917692093	4466.20478908859	68.3920194616923	4332.15643094368	4600.25314723351	0.2771377902328	0.00309253107533759	0.271076429325138	0.283199151140462
11	PreTest, EntryTest, ExitTest, DailyTest, Antigen	1	382.891722043721	16.0329206079828	351.467197652074	414.316246435367	880.424889030393	27.6910249779246	826.150480073661	934.699297987125	1263.31661107411	35.4232884234631	1193.88696576413	1332.7462563841	0.0818408632867872	0.00185439096917073	0.0782062569872126	0.0854754695863618
11	PreTest, EntryTest, ExitTest, DailyTest, Antigen	2	18.70135553243	3.58624035363914	11.6723244392973	25.7303866255627	45.3915647807748	6.18293970618343	33.2730029566553	57.5101266048943	64.0929203132048	7.94279596093521	48.5250402297718	79.6608003966378	0.0112543172828631	0.00070093220762013	0.00988049015592766	0.0126281444097986
11	PreTest, EntryTest, ExitTest, DailyTest, Antigen	3	0.407525125975029	0.518767574176322	-0.609259319410561	1.42430957136062	1.06902013560539	1.01339207046738	-0.917228322510672	3.05526859372145	1.47654526158042	1.26394768471851	-1.00079220046787	3.9538827236287	0.00155647622130813	0.000272906781824081	0.00102157892893293	0.00209137351368333
11	PreTest, EntryTest, ExitTest, DailyTest, Antigen	4	0.00823740338025214	0.0784956812556193	-0.145614131880762	0.162088938641266	0.0231283956102363	0.147253565416386	-0.26548859260588	0.311745383826353	0.0313657989904885	0.18725776198101	-0.335659414492292	0.398391012473269	0.000147535323056629	8.86585186264875e-05	-2.62353734512864e-05	0.000321306019564544
11	PreTest, EntryTest, ExitTest, DailyTest, Antigen	5	0	0	0	0	4.29860073912133e-07	1.30351775538727e-06	-2.12503472664691e-06	2.98475487447118e-06	4.29860073912133e-07	1.30351775538727e-06	-2.12503472664691e-06	2.98475487447118e-06	7.32698791099289e-06	1.89727748089811e-05	-2.98596507146101e-05	4.45136265365958e-05
11	PreTest, EntryTest, ExitTest, DailyTest, Antigen	6	0	0	0	0	7.84132609445142e-09	1.4470974329732e-07	-2.75789770768296e-07	2.91472422957199e-07	7.84132609445142e-09	1.4470974329732e-07	-2.75789770768296e-07	2.91472422957199e-07	1.41187775546974e-07	2.57514483796172e-06	-4.90609610685799e-06	5.18847165795194e-06
11	PreTest, EntryTest, ExitTest, DailyTest, Antigen	7	0	0	0	0	0	0	0	0	0	0	0	0	0	0	0	0
11	PreTest, EntryTest, ExitTest, DailyTest, Antigen	8	0	0	0	0	0	0	0	0	0	0	0	0	0	0	0	0
11	PreTest, EntryTest, ExitTest, DailyTest, Antigen	9	0	0	0	0	0	0	0	0	0	0	0	0	0	0	0	0
11	PreTest, EntryTest, ExitTest, DailyTest, Antigen	10	0	0	0	0	0	0	0	0	0	0	0	0	0	0	0	0
11	PreTest, EntryTest, ExitTest, DailyTest, Antigen	11	0	0	0	0	0	0	0	0	0	0	0	0	0	0	0	0
11	PreTest, EntryTest, ExitTest, DailyTest, Antigen	12	0	0	0	0	0	0	0	0	0	0	0	0	0	0	0	0
11	PreTest, EntryTest, ExitTest, DailyTest, Antigen	13	0	0	0	0	0	0	0	0	0	0	0	0	0	0	0	0
11	PreTest, EntryTest, ExitTest, DailyTest, Antigen	14	0	0	0	0	0	0	0	0	0	0	0	0	0	0	0	0
11	PreTest, EntryTest, ExitTest, DailyTest, Antigen	15	0	0	0	0	0	0	0	0	0	0	0	0	0	0	0	0
11	PreTest, EntryTest, ExitTest, DailyTest, Antigen	16	0	0	0	0	0	0	0	0	0	0	0	0	0	0	0	0
11	PreTest, EntryTest, ExitTest, DailyTest, Antigen	17	0	0	0	0	0	0	0	0	0	0	0	0	0	0	0	0
11	PreTest, EntryTest, ExitTest, DailyTest, Antigen	18	0	0	0	0	0	0	0	0	0	0	0	0	0	0	0	0
11	PreTest, EntryTest, ExitTest, DailyTest, Antigen	19	0	0	0	0	0	0	0	0	0	0	0	0	0	0	0	0
11	PreTest, EntryTest, ExitTest, DailyTest, Antigen	20	0	0	0	0	0	0	0	0	0	0	0	0	0	0	0	0
11	PreTest, EntryTest, ExitTest, DailyTest, Antigen	21	0	0	0	0	0	0	0	0	0	0	0	0	0	0	0	0
12	PreTest, EntryTest, ExitTest, DailyTest, PCR 1D	0	1523.70951862004	32.9455066798114	1459.13632552761	1588.28271171247	3469.57912819078	54.5572161842863	3362.64698446958	3576.51127191198	4993.28864681082	70.9300362551337	4854.26577575076	5132.31151787089	0.260367363816908	0.00303027314275307	0.254428028457112	0.266306699176704
12	PreTest, EntryTest, ExitTest, DailyTest, PCR 1D	1	1426.54663169172	31.560618854658	1364.68781873659	1488.40544464685	3466.64820612717	54.5401550715818	3359.74950218687	3573.54691006747	4893.19483781889	70.5157954121611	4754.98387881105	5031.40579682673	0.230636010218037	0.00289657977149199	0.224958713865913	0.236313306570161
12	PreTest, EntryTest, ExitTest, DailyTest, PCR 1D	2	216.889004709419	12.2430398535803	192.892646596402	240.885362822437	550.118966430114	22.0710826516717	506.859644432837	593.378288427391	767.007971139533	28.2883937523975	711.562719384834	822.453222894232	0.0350981422944705	0.00125638859615865	0.0326356206459996	0.0375606639429415
12	PreTest, EntryTest, ExitTest, DailyTest, PCR 1D	3	7.09773444328236	2.15745215629734	2.86912821693956	11.3263406696252	20.2050374726235	4.29266479557271	11.791414473301	28.6186604719461	27.3027719159059	5.38457139499429	16.7490119817171	37.8565318500947	0.00147315083583385	0.000261525554001388	0.000960560749991126	0.00198574092167657
12	PreTest, EntryTest, ExitTest, DailyTest, PCR 1D	4	0.126990775691817	0.280373365175236	-0.422541020051646	0.67652257143528	0.362921929847757	0.591542430111201	-0.796501233170197	1.52234509286571	0.489912705539574	0.742681594183683	-0.965743219060446	1.94556863013959	4.06273328382162e-05	4.38323854397213e-05	-4.52841426236377e-05	0.00012653880830007
12	PreTest, EntryTest, ExitTest, DailyTest, PCR 1D	5	0.00201061468485133	0.0339879175590735	-0.0646057037309327	0.0686269331006353	0.00667205635943345	0.0792909129678241	-0.148738133057502	0.162082245776369	0.00868267104428478	0.0974978673410608	-0.182413148944194	0.199778491032764	1.32353242983528e-06	7.8020869213984e-06	-1.39685579361056e-05	1.66156227957761e-05
12	PreTest, EntryTest, ExitTest, DailyTest, PCR 1D	6	0	0	0	0	1.89127737108918e-09	5.9807441797773e-08	-1.15331308552546e-07	1.19113863294724e-07	1.89127737108918e-09	5.9807441797773e-08	-1.15331308552546e-07	1.19113863294724e-07	4.75149672146726e-08	1.50255519346592e-06	-2.89749321197853e-06	2.99252314640788e-06
12	PreTest, EntryTest, ExitTest, DailyTest, PCR 1D	7	0	0	0	0	0	0	0	0	0	0	0	0	0	0	0	0
12	PreTest, EntryTest, ExitTest, DailyTest, PCR 1D	8	0	0	0	0	0	0	0	0	0	0	0	0	0	0	0	0
12	PreTest, EntryTest, ExitTest, DailyTest, PCR 1D	9	0	0	0	0	0	0	0	0	0	0	0	0	0	0	0	0
12	PreTest, EntryTest, ExitTest, DailyTest, PCR 1D	10	0	0	0	0	0	0	0	0	0	0	0	0	0	0	0	0
12	PreTest, EntryTest, ExitTest, DailyTest, PCR 1D	11	0	0	0	0	0	0	0	0	0	0	0	0	0	0	0	0
12	PreTest, EntryTest, ExitTest, DailyTest, PCR 1D	12	0	0	0	0	0	0	0	0	0	0	0	0	0	0	0	0
12	PreTest, EntryTest, ExitTest, DailyTest, PCR 1D	13	0	0	0	0	0	0	0	0	0	0	0	0	0	0	0	0
12	PreTest, EntryTest, ExitTest, DailyTest, PCR 1D	14	0	0	0	0	0	0	0	0	0	0	0	0	0	0	0	0
12	PreTest, EntryTest, ExitTest, DailyTest, PCR 1D	15	0	0	0	0	0	0	0	0	0	0	0	0	0	0	0	0
12	PreTest, EntryTest, ExitTest, DailyTest, PCR 1D	16	0	0	0	0	0	0	0	0	0	0	0	0	0	0	0	0
12	PreTest, EntryTest, ExitTest, DailyTest, PCR 1D	17	0	0	0	0	0	0	0	0	0	0	0	0	0	0	0	0
12	PreTest, EntryTest, ExitTest, DailyTest, PCR 1D	18	0	0	0	0	0	0	0	0	0	0	0	0	0	0	0	0
12	PreTest, EntryTest, ExitTest, DailyTest, PCR 1D	19	0	0	0	0	0	0	0	0	0	0	0	0	0	0	0	0
12	PreTest, EntryTest, ExitTest, DailyTest, PCR 1D	20	0	0	0	0	0	0	0	0	0	0	0	0	0	0	0	0
12	PreTest, EntryTest, ExitTest, DailyTest, PCR 1D	21	0	0	0	0	0	0	0	0	0	0	0	0	0	0	0	0
13	PreTest, EntryTest, ExitTest, DailyTest, PCR 2D	0	1630.22165012274	33.7603829062971	1564.0512996264	1696.39200061908	3722.80155275539	56.9081962207062	3611.2614881628	3834.34161734797	5353.02320287813	72.8240402932687	5210.28808390332	5495.75832185294	0.257405687351024	0.00296949840594587	0.25158547047537	0.263225904226678
13	PreTest, EntryTest, ExitTest, DailyTest, PCR 2D	1	1520.56560046396	32.055846752093	1457.73614082986	1583.39506009807	3712.72174634912	56.6420327068357	3601.70336224373	3823.74013045452	5233.28734681309	72.041186606122	5092.08662106509	5374.48807256109	0.235730973699885	0.00285305954055769	0.230138977000392	0.241322970399378
13	PreTest, EntryTest, ExitTest, DailyTest, PCR 2D	2	1035.40276746686	24.5647568449124	987.25584405083	1083.54969088289	3313.97642117568	52.4083803594242	3211.25599567121	3416.69684668015	4349.37918864254	65.1437425691856	4221.69745320694	4477.06092407814	0.198704481793161	0.0026926149484973	0.193426956494106	0.203982007092215
13	PreTest, EntryTest, ExitTest, DailyTest, PCR 2D	3	132.318882600859	8.15686176216554	116.331433547015	148.306331654704	502.318614316855	21.5004630332443	460.177706771697	544.459521862014	634.637496917715	25.6981649039891	584.269093705896	685.005900129533	0.0293027028333966	0.0011520897519278	0.0270446069196181	0.0315607987471751
13	PreTest, EntryTest, ExitTest, DailyTest, PCR 2D	4	4.09741043900803	1.44577964305728	1.26368233861577	6.93113853940029	16.6231923658665	3.66067793475484	9.448263613747	23.798121117986	20.7206028048745	4.42392258956303	12.049714529331	29.3914910804181	0.00104067650948232	0.000213238528996065	0.000622728992650034	0.00145862402631461
13	PreTest, EntryTest, ExitTest, DailyTest, PCR 2D	5	0.0852881160865658	0.21871079541452	-0.343385042925894	0.513961275099026	0.308704609417867	0.526681571127194	-0.723591269991433	1.34100048882717	0.393992725504433	0.653770380294196	-0.887397219872191	1.67538267088106	2.02769347088068e-05	3.15551145010308e-05	-4.15710897132136e-05	8.21249591308271e-05
13	PreTest, EntryTest, ExitTest, DailyTest, PCR 2D	6	0.00189770344071426	0.0228035295061247	-0.0427972143912901	0.0465926212727186	0.00864040093816205	0.0858895104226871	-0.159703039490305	0.176983841366629	0.0105381043788763	0.104002799217478	-0.19330738208738	0.214383590845133	5.66842532273844e-07	5.14600614744947e-06	-9.51932951672711e-06	1.06530145812748e-05
13	PreTest, EntryTest, ExitTest, DailyTest, PCR 2D	7	0	0	0	0	0	0	0	0	0	0	0	0	0	0	0	0
13	PreTest, EntryTest, ExitTest, DailyTest, PCR 2D	8	0	0	0	0	0	0	0	0	0	0	0	0	0	0	0	0
13	PreTest, EntryTest, ExitTest, DailyTest, PCR 2D	9	0	0	0	0	0	0	0	0	0	0	0	0	0	0	0	0
13	PreTest, EntryTest, ExitTest, DailyTest, PCR 2D	10	0	0	0	0	0	0	0	0	0	0	0	0	0	0	0	0
13	PreTest, EntryTest, ExitTest, DailyTest, PCR 2D	11	0	0	0	0	0	0	0	0	0	0	0	0	0	0	0	0
13	PreTest, EntryTest, ExitTest, DailyTest, PCR 2D	12	0	0	0	0	0	0	0	0	0	0	0	0	0	0	0	0
13	PreTest, EntryTest, ExitTest, DailyTest, PCR 2D	13	0	0	0	0	0	0	0	0	0	0	0	0	0	0	0	0
13	PreTest, EntryTest, ExitTest, DailyTest, PCR 2D	14	0	0	0	0	0	0	0	0	0	0	0	0	0	0	0	0
13	PreTest, EntryTest, ExitTest, DailyTest, PCR 2D	15	0	0	0	0	0	0	0	0	0	0	0	0	0	0	0	0
13	PreTest, EntryTest, ExitTest, DailyTest, PCR 2D	16	0	0	0	0	0	0	0	0	0	0	0	0	0	0	0	0
13	PreTest, EntryTest, ExitTest, DailyTest, PCR 2D	17	0	0	0	0	0	0	0	0	0	0	0	0	0	0	0	0
13	PreTest, EntryTest, ExitTest, DailyTest, PCR 2D	18	0	0	0	0	0	0	0	0	0	0	0	0	0	0	0	0
13	PreTest, EntryTest, ExitTest, DailyTest, PCR 2D	19	0	0	0	0	0	0	0	0	0	0	0	0	0	0	0	0
13	PreTest, EntryTest, ExitTest, DailyTest, PCR 2D	20	0	0	0	0	0	0	0	0	0	0	0	0	0	0	0	0
13	PreTest, EntryTest, ExitTest, DailyTest, PCR 2D	21	0	0	0	0	0	0	0	0	0	0	0	0	0	0	0	0
14	PreTest, EntryTest, ExitTest, TestEvery2Days, PCR 0D	0	1224.78224418244	29.443809111947	1167.07237832302	1282.49211004186	2785.05227896923	49.810256691039	2687.42417585479	2882.68038208366	4009.83452315167	64.3501420982399	3883.70824463912	4135.96080166422	0.240174062851818	0.00290668265993468	0.234476964838346	0.24587116086529
14	PreTest, EntryTest, ExitTest, TestEvery2Days, PCR 0D	1	233.195094578471	13.1248988541163	207.470292824403	258.919896332539	536.483874703692	21.8590307733567	493.640174387913	579.327575019471	769.678969282163	28.556102204229	713.709008961874	825.648929602452	0.0475796298133801	0.00145863746348325	0.0447207003849529	0.0504385592418073
14	PreTest, EntryTest, ExitTest, TestEvery2Days, PCR 0D	2	43.8928192399568	5.55681380585795	33.0014641804752	54.7841742994383	105.370683621582	9.53945270105938	86.6733563275057	124.068010915658	149.263502861539	12.1756834102547	125.39916337744	173.127842345638	0.0114071977838679	0.000721440448099416	0.00999317450559303	0.0128212210621427
14	PreTest, EntryTest, ExitTest, TestEvery2Days, PCR 0D	3	0.410896264757337	0.52060132273813	-0.609482327809399	1.43127485732407	1.11964225415308	1.01839084721858	-0.876403806395324	3.11568831470149	1.53053851891042	1.28533519580606	-0.988718464869463	4.04979550269031	0.000886739322214107	0.000201413079894971	0.000491969685619963	0.00128150895880825
14	PreTest, EntryTest, ExitTest, TestEvery2Days, PCR 0D	4	0.0762148367270312	0.229701007688712	-0.373999138342844	0.526428811796906	0.266538155414558	0.481227949770516	-0.676668626135654	1.20974493696477	0.342752992141589	0.599780455611929	-0.832816700857792	1.51832268514097	0.000135287973165227	7.80714735268957e-05	-1.77321149474886e-05	0.000288308061277943
14	PreTest, EntryTest, ExitTest, TestEvery2Days, PCR 0D	5	0.00113916147585083	0.0293732239616788	-0.0564323574890397	0.0587106804407413	0.00534033143538864	0.0691860180449138	-0.130264263932642	0.14094492680342	0.00647949291123948	0.0791957634940385	-0.148744203537076	0.161703189359555	1.05866684387892e-05	2.2267133401302e-05	-3.30569130277626e-05	5.4230249905341e-05
14	PreTest, EntryTest, ExitTest, TestEvery2Days, PCR 0D	6	0	0	0	0	0.00159529731598394	0.0367942652366108	-0.0705214625477731	0.073712057179741	0.00159529731598394	0.0367942652366108	-0.0705214625477731	0.073712057179741	2.50458274022535e-06	1.08046684880668e-05	-1.86725674963855e-05	2.36817329768362e-05
14	PreTest, EntryTest, ExitTest, TestEvery2Days, PCR 0D	7	0	0	0	0	6.78724079946782e-06	0.000141100071435848	-0.000269768899214793	0.000283343380813729	6.78724079946782e-06	0.000141100071435848	-0.000269768899214793	0.000283343380813729	5.69115041733507e-07	5.16674375878879e-06	-9.55770272549252e-06	1.06959328089595e-05
14	PreTest, EntryTest, ExitTest, TestEvery2Days, PCR 0D	8	0	0	0	0	2.43723164679249e-06	2.46185349049579e-05	-4.5815096766925e-05	5.068956006051e-05	2.43723164679249e-06	2.46185349049579e-05	-4.5815096766925e-05	5.068956006051e-05	1.27798556641138e-06	7.67581346103441e-06	-1.37666088172161e-05	1.63225799500388e-05
14	PreTest, EntryTest, ExitTest, TestEvery2Days, PCR 0D	9	0	0	0	0	1.10766423087088e-06	1.62979489314975e-05	-3.08363156748643e-05	3.30516441366061e-05	1.10766423087088e-06	1.62979489314975e-05	-3.08363156748643e-05	3.30516441366061e-05	8.98250568036262e-07	6.45772323528151e-06	-1.17588869731155e-05	1.3555388109188e-05
14	PreTest, EntryTest, ExitTest, TestEvery2Days, PCR 0D	10	0	0	0	0	1.42337586066817e-07	2.65176217898366e-06	-5.05511628474115e-06	5.33979145687479e-06	1.42337586066817e-07	2.65176217898366e-06	-5.05511628474115e-06	5.33979145687479e-06	4.72927222995454e-07	4.70802146402786e-06	-8.75479484649914e-06	9.70064929249005e-06
14	PreTest, EntryTest, ExitTest, TestEvery2Days, PCR 0D	11	0	0	0	0	1.35244030224075e-08	1.78710596415125e-07	-3.36748365951238e-07	3.63797171996053e-07	1.35244030224075e-08	1.78710596415125e-07	-3.36748365951238e-07	3.63797171996053e-07	2.82145494399783e-07	3.63344523972793e-06	-6.83940717546696e-06	7.40369816426652e-06
14	PreTest, EntryTest, ExitTest, TestEvery2Days, PCR 0D	12	0	0	0	0	0	0	0	0	0	0	0	0	0	0	0	0
14	PreTest, EntryTest, ExitTest, TestEvery2Days, PCR 0D	13	0	0	0	0	0	0	0	0	0	0	0	0	0	0	0	0
14	PreTest, EntryTest, ExitTest, TestEvery2Days, PCR 0D	14	0	0	0	0	0	0	0	0	0	0	0	0	0	0	0	0
14	PreTest, EntryTest, ExitTest, TestEvery2Days, PCR 0D	15	0	0	0	0	0	0	0	0	0	0	0	0	0	0	0	0
14	PreTest, EntryTest, ExitTest, TestEvery2Days, PCR 0D	16	0	0	0	0	0	0	0	0	0	0	0	0	0	0	0	0
14	PreTest, EntryTest, ExitTest, TestEvery2Days, PCR 0D	17	0	0	0	0	0	0	0	0	0	0	0	0	0	0	0	0
14	PreTest, EntryTest, ExitTest, TestEvery2Days, PCR 0D	18	0	0	0	0	0	0	0	0	0	0	0	0	0	0	0	0
14	PreTest, EntryTest, ExitTest, TestEvery2Days, PCR 0D	19	0	0	0	0	0	0	0	0	0	0	0	0	0	0	0	0
14	PreTest, EntryTest, ExitTest, TestEvery2Days, PCR 0D	20	0	0	0	0	0	0	0	0	0	0	0	0	0	0	0	0
14	PreTest, EntryTest, ExitTest, TestEvery2Days, PCR 0D	21	0	0	0	0	0	0	0	0	0	0	0	0	0	0	0	0
15	PreTest, EntryTest, ExitTest, TestEvery2Days, Antigen	0	1362.85149894509	30.8633381705941	1302.35935613073	1423.34364175946	3103.3532901435	53.0642279476689	2999.34740336607	3207.35917692093	4466.20478908859	68.3920194616923	4332.15643094368	4600.25314723351	0.2771377902328	0.00309253107533759	0.271076429325138	0.283199151140462
15	PreTest, EntryTest, ExitTest, TestEvery2Days, Antigen	1	382.891722043721	16.0329206079828	351.467197652074	414.316246435367	880.424889030393	27.6910249779246	826.150480073661	934.699297987125	1263.31661107411	35.4232884234631	1193.88696576413	1332.7462563841	0.0818408632867872	0.00185439096917073	0.0782062569872126	0.0854754695863618
15	PreTest, EntryTest, ExitTest, TestEvery2Days, Antigen	2	74.5236163642937	7.28824995376537	60.2386464549136	88.8085862736739	179.006290505546	12.9582405843148	153.608138960289	204.404442050803	253.52990686984	16.4351296863811	221.317052684533	285.742761055147	0.0213176189664288	0.000959867613629929	0.0194362784437141	0.0231989594891435
15	PreTest, EntryTest, ExitTest, TestEvery2Days, Antigen	3	0.809248750850915	0.746828118077733	-0.654534360581441	2.27303186228327	2.15351076956223	1.42306909130404	-0.635704649393678	4.94272618851814	2.96275952041315	1.78990696065763	-0.545458122475804	6.4709771633021	0.00225186698005485	0.000329668799555068	0.00160571613292692	0.00289801782718279
15	PreTest, EntryTest, ExitTest, TestEvery2Days, Antigen	4	0.16372625461624	0.326323463624861	-0.475867734088489	0.803320243320968	0.502481242372835	0.669563000484195	-0.809862238576187	1.81482472332186	0.666207496989074	0.850716991124954	-1.00119780561584	2.33361279959398	0.000352235910913537	0.000137180672586213	8.33617926445604e-05	0.000621110029182514
15	PreTest, EntryTest, ExitTest, TestEvery2Days, Antigen	5	0.00248800448471662	0.0444673390238471	-0.0846679800020236	0.0896439889714569	0.00404748963811606	0.0568801085989756	-0.107437523215876	0.115532502492108	0.00653549412283269	0.0847052992348643	-0.159486892377501	0.172557880623167	2.94846807300392e-05	3.60933036684997e-05	-4.12581944602202e-05	0.000100227555920298
15	PreTest, EntryTest, ExitTest, TestEvery2Days, Antigen	6	0	0	0	0	0.000497668624893259	0.00482394737961824	-0.0089572682391585	0.00995260548894501	0.000497668624893259	0.00482394737961824	-0.0089572682391585	0.00995260548894501	5.33798134332382e-06	1.58360827072681e-05	-2.57007407629217e-05	3.63767034495693e-05
15	PreTest, EntryTest, ExitTest, TestEvery2Days, Antigen	7	0	0	0	0	4.23023520993693e-05	0.000661623471298241	-0.00125447965164518	0.00133908435584392	4.23023520993693e-05	0.000661623471298241	-0.00125447965164518	0.00133908435584392	2.59960463371777e-06	1.11914396764481e-05	-1.93356171321205e-05	2.45348263995561e-05
15	PreTest, EntryTest, ExitTest, TestEvery2Days, Antigen	8	0	0	0	0	7.84131482840552e-06	0.000103236119754942	-0.000194501479891281	0.000210184109548092	7.84131482840552e-06	0.000103236119754942	-0.000194501479891281	0.000210184109548092	3.8731543616174e-06	1.33033771217381e-05	-2.22014647969893e-05	2.99477735202241e-05
15	PreTest, EntryTest, ExitTest, TestEvery2Days, Antigen	9	0	0	0	0	8.43695575731205e-07	5.8832500755199e-06	-1.06874745722878e-05	1.23748657237502e-05	8.43695575731205e-07	5.8832500755199e-06	-1.06874745722878e-05	1.23748657237502e-05	3.30605697519205e-06	1.25986457169871e-05	-2.13872886301026e-05	2.79994025804867e-05
15	PreTest, EntryTest, ExitTest, TestEvery2Days, Antigen	10	0	0	0	0	2.07209718348627e-07	1.97897050060531e-06	-3.67157246283778e-06	4.08599189953503e-06	2.07209718348627e-07	1.97897050060531e-06	-3.67157246283778e-06	4.08599189953503e-06	1.70033419607734e-06	9.05939058324964e-06	-1.60560713470919e-05	1.94567397392466e-05
15	PreTest, EntryTest, ExitTest, TestEvery2Days, Antigen	11	0	0	0	0	1.26080570811551e-08	2.03792336073628e-07	-3.86824921623156e-07	4.12041035785467e-07	1.26080570811551e-08	2.03792336073628e-07	-3.86824921623156e-07	4.12041035785467e-07	1.8915175863024e-07	2.98632620760289e-06	-5.66404760827143e-06	6.04235112553191e-06
15	PreTest, EntryTest, ExitTest, TestEvery2Days, Antigen	12	0	0	0	0	0	0	0	0	0	0	0	0	0	0	0	0
15	PreTest, EntryTest, ExitTest, TestEvery2Days, Antigen	13	0	0	0	0	0	0	0	0	0	0	0	0	0	0	0	0
15	PreTest, EntryTest, ExitTest, TestEvery2Days, Antigen	14	0	0	0	0	0	0	0	0	0	0	0	0	0	0	0	0
15	PreTest, EntryTest, ExitTest, TestEvery2Days, Antigen	15	0	0	0	0	0	0	0	0	0	0	0	0	0	0	0	0
15	PreTest, EntryTest, ExitTest, TestEvery2Days, Antigen	16	0	0	0	0	0	0	0	0	0	0	0	0	0	0	0	0
15	PreTest, EntryTest, ExitTest, TestEvery2Days, Antigen	17	0	0	0	0	0	0	0	0	0	0	0	0	0	0	0	0
15	PreTest, EntryTest, ExitTest, TestEvery2Days, Antigen	18	0	0	0	0	0	0	0	0	0	0	0	0	0	0	0	0
15	PreTest, EntryTest, ExitTest, TestEvery2Days, Antigen	19	0	0	0	0	0	0	0	0	0	0	0	0	0	0	0	0
15	PreTest, EntryTest, ExitTest, TestEvery2Days, Antigen	20	0	0	0	0	0	0	0	0	0	0	0	0	0	0	0	0
15	PreTest, EntryTest, ExitTest, TestEvery2Days, Antigen	21	0	0	0	0	0	0	0	0	0	0	0	0	0	0	0	0
16	PreTest, EntryTest, ExitTest, TestEvery2Days, PCR 1D	0	1523.70951862004	32.9455066798114	1459.13632552761	1588.28271171247	3469.57912819078	54.5572161842863	3362.64698446958	3576.51127191198	4993.28864681082	70.9300362551337	4854.26577575076	5132.31151787089	0.260367363816908	0.00303027314275307	0.254428028457112	0.266306699176704
16	PreTest, EntryTest, ExitTest, TestEvery2Days, PCR 1D	1	1426.54663169172	31.560618854658	1364.68781873659	1488.40544464685	3466.64820612717	54.5401550715818	3359.74950218687	3573.54691006747	4893.19483781889	70.5157954121611	4754.98387881105	5031.40579682673	0.230636010218037	0.00289657977149199	0.224958713865913	0.236313306570161
16	PreTest, EntryTest, ExitTest, TestEvery2Days, PCR 1D	2	216.889004709419	12.2430398535803	192.892646596402	240.885362822437	550.118966430114	22.0710826516717	506.859644432837	593.378288427391	767.007971139533	28.2883937523975	711.562719384834	822.453222894232	0.0350981422944705	0.00125638859615865	0.0326356206459996	0.0375606639429415
16	PreTest, EntryTest, ExitTest, TestEvery2Days, PCR 1D	3	32.6955721440308	4.35060160503778	24.1683929981568	41.2227512899049	106.135276036197	9.55542435904338	87.4066442924717	124.863907779922	138.830848180228	11.7792179967221	115.743580906652	161.918115453803	0.00661054994074544	0.000534952155150238	0.00556204371665098	0.00765905616483991
16	PreTest, EntryTest, ExitTest, TestEvery2Days, PCR 1D	4	0.331695951345455	0.459479042920326	-0.568882972778384	1.23227487546929	1.1033245883778	1.00799809860007	-0.872351684878349	3.07900086163394	1.43502053972325	1.24771794006539	-1.01050662280491	3.88054770225141	0.000112556719612616	7.0177862800132e-05	-2.49918914756429e-05	0.000250105330700874
16	PreTest, EntryTest, ExitTest, TestEvery2Days, PCR 1D	5	0.0521640925184178	0.171808010955652	-0.28457960895466	0.388907793991496	0.216355199402376	0.437185727138379	-0.640528825788846	1.0732392245936	0.268519291920794	0.533296125717421	-0.776741114485351	1.31377969832694	2.43413673801047e-05	3.34888791601209e-05	-4.12968357737322e-05	8.99795705339416e-05
16	PreTest, EntryTest, ExitTest, TestEvery2Days, PCR 1D	6	0.000242184336386537	0.0076585411659785	-0.0147685563489313	0.0152529250217044	0.0042712044111027	0.0652765554260702	-0.123670844223995	0.1322132530462	0.00451338874748924	0.0686737521154986	-0.130087165398888	0.139113942893867	1.37036595528762e-06	7.93360835539337e-06	-1.41795064212834e-05	1.69202383318586e-05
16	PreTest, EntryTest, ExitTest, TestEvery2Days, PCR 1D	7	0	0	0	0	0.00119685821451306	0.0351896379936854	-0.0677748322531103	0.0701685486821364	0.00119685821451306	0.0351896379936854	-0.0677748322531103	0.0701685486821364	1.88926866366157e-06	9.49637288833277e-06	-1.67236221974707e-05	2.05021595247938e-05
16	PreTest, EntryTest, ExitTest, TestEvery2Days, PCR 1D	8	0	0	0	0	1.32309488289068e-06	2.67572475899566e-05	-5.11211103934242e-05	5.37673001592056e-05	1.32309488289068e-06	2.67572475899566e-05	-5.11211103934242e-05	5.37673001592056e-05	6.64639363086602e-07	5.58068601145074e-06	-1.02735052193568e-05	1.160278394553e-05
16	PreTest, EntryTest, ExitTest, TestEvery2Days, PCR 1D	9	0	0	0	0	3.91027279015882e-07	4.03333187435199e-06	-7.51430319471402e-06	8.29635775274578e-06	3.91027279015882e-07	4.03333187435199e-06	-7.51430319471402e-06	8.29635775274578e-06	1.1834259512536e-06	7.39430805761508e-06	-1.3309417841672e-05	1.56762697441792e-05
16	PreTest, EntryTest, ExitTest, TestEvery2Days, PCR 1D	10	0	0	0	0	1.80203916972145e-07	2.76171655719382e-06	-5.23276053512774e-06	5.59316836907203e-06	1.80203916972145e-07	2.76171655719382e-06	-5.23276053512774e-06	5.59316836907203e-06	6.61770798025124e-07	5.55657801827313e-06	-1.02291221177902e-05	1.15526637138405e-05
16	PreTest, EntryTest, ExitTest, TestEvery2Days, PCR 1D	11	0	0	0	0	2.03851536112784e-08	4.57959908559283e-07	-8.77216267164917e-07	9.17986574387473e-07	2.03851536112784e-08	4.57959908559283e-07	-8.77216267164917e-07	9.17986574387473e-07	1.88802950604428e-07	2.98084861809739e-06	-5.65366034086646e-06	6.03126624207532e-06
16	PreTest, EntryTest, ExitTest, TestEvery2Days, PCR 1D	12	0	0	0	0	0	0	0	0	0	0	0	0	0	0	0	0
16	PreTest, EntryTest, ExitTest, TestEvery2Days, PCR 1D	13	0	0	0	0	0	0	0	0	0	0	0	0	0	0	0	0
16	PreTest, EntryTest, ExitTest, TestEvery2Days, PCR 1D	14	0	0	0	0	0	0	0	0	0	0	0	0	0	0	0	0
16	PreTest, EntryTest, ExitTest, TestEvery2Days, PCR 1D	15	0	0	0	0	0	0	0	0	0	0	0	0	0	0	0	0
16	PreTest, EntryTest, ExitTest, TestEvery2Days, PCR 1D	16	0	0	0	0	0	0	0	0	0	0	0	0	0	0	0	0
16	PreTest, EntryTest, ExitTest, TestEvery2Days, PCR 1D	17	0	0	0	0	0	0	0	0	0	0	0	0	0	0	0	0
16	PreTest, EntryTest, ExitTest, TestEvery2Days, PCR 1D	18	0	0	0	0	0	0	0	0	0	0	0	0	0	0	0	0
16	PreTest, EntryTest, ExitTest, TestEvery2Days, PCR 1D	19	0	0	0	0	0	0	0	0	0	0	0	0	0	0	0	0
16	PreTest, EntryTest, ExitTest, TestEvery2Days, PCR 1D	20	0	0	0	0	0	0	0	0	0	0	0	0	0	0	0	0
16	PreTest, EntryTest, ExitTest, TestEvery2Days, PCR 1D	21	0	0	0	0	0	0	0	0	0	0	0	0	0	0	0	0
17	PreTest, EntryTest, ExitTest, TestEvery2Days, PCR 2D	0	1630.22165012274	33.7603829062971	1564.0512996264	1696.39200061908	3722.80155275539	56.9081962207062	3611.2614881628	3834.34161734797	5353.02320287813	72.8240402932687	5210.28808390332	5495.75832185294	0.257405687351024	0.00296949840594587	0.25158547047537	0.263225904226678
17	PreTest, EntryTest, ExitTest, TestEvery2Days, PCR 2D	1	1520.56560046396	32.055846752093	1457.73614082986	1583.39506009807	3712.72174634912	56.6420327068357	3601.70336224373	3823.74013045452	5233.28734681309	72.041186606122	5092.08662106509	5374.48807256109	0.235730973699885	0.00285305954055769	0.230138977000392	0.241322970399378
17	PreTest, EntryTest, ExitTest, TestEvery2Days, PCR 2D	2	1035.40276746686	24.5647568449124	987.25584405083	1083.54969088289	3313.97642117568	52.4083803594242	3211.25599567121	3416.69684668015	4349.37918864254	65.1437425691856	4221.69745320694	4477.06092407814	0.198704481793161	0.0026926149484973	0.193426956494106	0.203982007092215
17	PreTest, EntryTest, ExitTest, TestEvery2Days, PCR 2D	3	132.318882600859	8.15686176216554	116.331433547015	148.306331654704	502.318614316855	21.5004630332443	460.177706771697	544.459521862014	634.637496917715	25.6981649039891	584.269093705896	685.005900129533	0.0293027028333966	0.0011520897519278	0.0270446069196181	0.0315607987471751
17	PreTest, EntryTest, ExitTest, TestEvery2Days, PCR 2D	4	13.5919088972112	2.53014870011384	8.63281744498806	18.5510003494343	65.5416606943486	7.25747232598292	51.317014935422	79.7663064532751	79.1335695915597	8.56856611296996	62.3391800101386	95.9279591729809	0.00457737461309287	0.000467700029948146	0.0036606825543945	0.00549406667179123
17	PreTest, EntryTest, ExitTest, TestEvery2Days, PCR 2D	5	0.191239348209993	0.327962742809795	-0.451567627697204	0.834046324117191	0.770723024086203	0.842691057599282	-0.88095144880839	2.4223974969808	0.961962372296196	1.02839279664856	-1.05368750913497	2.97761225372737	5.49074695339905e-05	5.26555970819064e-05	-4.8297500746546e-05	0.000158112439814527
17	PreTest, EntryTest, ExitTest, TestEvery2Days, PCR 2D	6	0.0236177600709799	0.101195101087634	-0.174724638060782	0.221960158202742	0.128697293689561	0.339222853269537	-0.53617949871873	0.793574086097853	0.152315053760541	0.393696091284117	-0.619329285156328	0.923959392677411	1.76696977259473e-05	3.00530399538099e-05	-4.12342605835201e-05	7.65736560354146e-05
17	PreTest, EntryTest, ExitTest, TestEvery2Days, PCR 2D	7	0	0	0	0	0.000872970384252792	0.025956141056374	-0.0500010660862403	0.0517470068547459	0.000872970384252792	0.025956141056374	-0.0500010660862403	0.0517470068547459	1.32324905052743e-06	7.80038348577878e-06	-1.3965502581599e-05	1.66120006826538e-05
17	PreTest, EntryTest, ExitTest, TestEvery2Days, PCR 2D	8	0	0	0	0	1.44180277778524e-05	0.000236552969373747	-0.000449225792194693	0.000478061847750397	1.44180277778524e-05	0.000236552969373747	-0.000449225792194693	0.000478061847750397	1.88999266632811e-06	9.26380982509142e-06	-1.62670745908511e-05	2.00470599235073e-05
17	PreTest, EntryTest, ExitTest, TestEvery2Days, PCR 2D	9	0	0	0	0	2.49754716583387e-07	3.22361630557814e-06	-6.06853324234977e-06	6.56804267551655e-06	2.49754716583387e-07	3.22361630557814e-06	-6.06853324234977e-06	6.56804267551655e-06	7.54682239204476e-07	5.92149722787555e-06	-1.08514523274316e-05	1.23608168058406e-05
17	PreTest, EntryTest, ExitTest, TestEvery2Days, PCR 2D	10	0	0	0	0	4.88113180695071e-08	5.3224056223877e-07	-9.94380183918481e-07	1.0920028200575e-06	4.88113180695071e-08	5.3224056223877e-07	-9.94380183918481e-07	1.0920028200575e-06	5.20116204203908e-07	4.93430222205254e-06	-9.15111615101907e-06	1.01913485594269e-05
17	PreTest, EntryTest, ExitTest, TestEvery2Days, PCR 2D	11	0	0	0	0	2.7444310153663e-08	7.99094307312021e-07	-1.5387805321779e-06	1.59366915248522e-06	2.7444310153663e-08	7.99094307312021e-07	-1.5387805321779e-06	1.59366915248522e-06	9.40933326533966e-08	2.10296278954182e-06	-4.02771373484857e-06	4.21590040015536e-06
17	PreTest, EntryTest, ExitTest, TestEvery2Days, PCR 2D	12	0	0	0	0	0	0	0	0	0	0	0	0	0	0	0	0
17	PreTest, EntryTest, ExitTest, TestEvery2Days, PCR 2D	13	0	0	0	0	0	0	0	0	0	0	0	0	0	0	0	0
17	PreTest, EntryTest, ExitTest, TestEvery2Days, PCR 2D	14	0	0	0	0	0	0	0	0	0	0	0	0	0	0	0	0
17	PreTest, EntryTest, ExitTest, TestEvery2Days, PCR 2D	15	0	0	0	0	0	0	0	0	0	0	0	0	0	0	0	0
17	PreTest, EntryTest, ExitTest, TestEvery2Days, PCR 2D	16	0	0	0	0	0	0	0	0	0	0	0	0	0	0	0	0
17	PreTest, EntryTest, ExitTest, TestEvery2Days, PCR 2D	17	0	0	0	0	0	0	0	0	0	0	0	0	0	0	0	0
17	PreTest, EntryTest, ExitTest, TestEvery2Days, PCR 2D	18	0	0	0	0	0	0	0	0	0	0	0	0	0	0	0	0
17	PreTest, EntryTest, ExitTest, TestEvery2Days, PCR 2D	19	0	0	0	0	0	0	0	0	0	0	0	0	0	0	0	0
17	PreTest, EntryTest, ExitTest, TestEvery2Days, PCR 2D	20	0	0	0	0	0	0	0	0	0	0	0	0	0	0	0	0
17	PreTest, EntryTest, ExitTest, TestEvery2Days, PCR 2D	21	0	0	0	0	0	0	0	0	0	0	0	0	0	0	0	0
18	PreTest, EntryTest, ExitTest, TestEvery3Days, PCR 0D	0	1224.78224418244	29.443809111947	1167.07237832302	1282.49211004186	2785.05227896923	49.810256691039	2687.42417585479	2882.68038208366	4009.83452315167	64.3501420982399	3883.70824463912	4135.96080166422	0.240174062851818	0.00290668265993468	0.234476964838346	0.24587116086529
18	PreTest, EntryTest, ExitTest, TestEvery3Days, PCR 0D	1	233.195094578471	13.1248988541163	207.470292824403	258.919896332539	536.483874703692	21.8590307733567	493.640174387913	579.327575019471	769.678969282163	28.556102204229	713.709008961874	825.648929602452	0.0475796298133801	0.00145863746348325	0.0447207003849529	0.0504385592418073
18	PreTest, EntryTest, ExitTest, TestEvery3Days, PCR 0D	2	43.8928192399568	5.55681380585795	33.0014641804752	54.7841742994383	105.370683621582	9.53945270105938	86.6733563275057	124.068010915658	149.263502861539	12.1756834102547	125.39916337744	173.127842345638	0.0114071977838679	0.000721440448099416	0.00999317450559303	0.0128212210621427
18	PreTest, EntryTest, ExitTest, TestEvery3Days, PCR 0D	3	5.66192826037536	1.91206876749224	1.91427347609057	9.40958304466014	16.8814846461533	4.02492661715431	8.99262847653089	24.7703408157758	22.5434129065287	5.0183066468147	12.7075318787719	32.3792939342855	0.00221292424283326	0.000324134900309288	0.00157761983822705	0.00284822864743946
18	PreTest, EntryTest, ExitTest, TestEvery3Days, PCR 0D	4	0.0293774002966511	0.136856330194816	-0.238861006885189	0.297615807478491	0.123672583770232	0.305165797061294	-0.474452378469904	0.721797546010368	0.153049984066883	0.373633058842453	-0.579270811264324	0.88537077939809	0.000162831864563254	8.54083962790695e-05	-4.56859214372234e-06	0.00033023232127023
18	PreTest, EntryTest, ExitTest, TestEvery3Days, PCR 0D	5	0.0120494173813516	0.0983323555666021	-0.180681999529188	0.204780834291892	0.0385914125772848	0.126654360859974	-0.209651134708264	0.286833959862834	0.0506408299586364	0.182396309359858	-0.306855936386684	0.408137596303957	4.43696465463173e-05	4.41663307666501e-05	-4.21963617563169e-05	0.000130935654848952
18	PreTest, EntryTest, ExitTest, TestEvery3Days, PCR 0D	6	0.000505312490420812	0.0116085132234757	-0.0222473734275915	0.0232579984084331	0.0127758784879331	0.0540670266495201	-0.0931954937451263	0.118747250720992	0.0132811909783539	0.0616381138450615	-0.107529512157967	0.134091894114674	5.19830949907802e-05	4.78502421023153e-05	-4.18033795297579e-05	0.000145769569511318
18	PreTest, EntryTest, ExitTest, TestEvery3Days, PCR 0D	7	0	0	0	0	0.000389316120912736	0.00201997357821451	-0.00356983209238771	0.00434846433421318	0.000389316120912736	0.00201997357821451	-0.00356983209238771	0.00434846433421318	2.14965800220174e-05	3.29952045377587e-05	-4.31740208719895e-05	8.61671809160244e-05
18	PreTest, EntryTest, ExitTest, TestEvery3Days, PCR 0D	8	0	0	0	0	0.000115984470077037	0.000339440905131091	-0.0005493197039799	0.000781288644133975	0.000115984470077037	0.000339440905131091	-0.0005493197039799	0.000781288644133975	3.69582647351559e-05	4.08180576466222e-05	-4.30451282522236e-05	0.000116961657722535
18	PreTest, EntryTest, ExitTest, TestEvery3Days, PCR 0D	9	0	0	0	0	2.52479466204018e-05	5.93682140329712e-05	-9.11137528842218e-05	0.000141609646125025	2.52479466204018e-05	5.93682140329712e-05	-9.11137528842218e-05	0.000141609646125025	4.53707150914875e-05	4.65096137557441e-05	-4.57881278697709e-05	0.000136529558052746
18	PreTest, EntryTest, ExitTest, TestEvery3Days, PCR 0D	10	0	0	0	0	4.34852644964054e-06	1.40911201979063e-05	-2.32700691382557e-05	3.19671220375368e-05	4.34852644964054e-06	1.40911201979063e-05	-2.32700691382557e-05	3.19671220375368e-05	2.57113340418253e-05	3.44216143495041e-05	-4.17550300832028e-05	9.31776981668533e-05
18	PreTest, EntryTest, ExitTest, TestEvery3Days, PCR 0D	11	0	0	0	0	6.15087803891009e-07	2.291852453878e-06	-3.87694300570987e-06	5.10711861349189e-06	6.15087803891009e-07	2.291852453878e-06	-3.87694300570987e-06	5.10711861349189e-06	8.21968966536222e-06	2.04764684741704e-05	-3.19141885440117e-05	4.83535678747361e-05
18	PreTest, EntryTest, ExitTest, TestEvery3Days, PCR 0D	12	0	0	0	0	1.00950543815202e-07	6.65812210646778e-07	-1.20404138905248e-06	1.40594247668289e-06	1.00950543815202e-07	6.65812210646778e-07	-1.20404138905248e-06	1.40594247668289e-06	1.51536623823429e-06	8.60521515923297e-06	-1.53508554738623e-05	1.83815879503309e-05
18	PreTest, EntryTest, ExitTest, TestEvery3Days, PCR 0D	13	0	0	0	0	1.55119166564013e-09	4.90529875089316e-08	-9.45926638518658e-08	9.76950471831461e-08	1.55119166564013e-09	4.90529875089316e-08	-9.45926638518658e-08	9.76950471831461e-08	4.74676033607063e-08	1.50105741689295e-06	-2.89460493374948e-06	2.98954014047089e-06
18	PreTest, EntryTest, ExitTest, TestEvery3Days, PCR 0D	14	0	0	0	0	0	0	0	0	0	0	0	0	0	0	0	0
18	PreTest, EntryTest, ExitTest, TestEvery3Days, PCR 0D	15	0	0	0	0	0	0	0	0	0	0	0	0	0	0	0	0
18	PreTest, EntryTest, ExitTest, TestEvery3Days, PCR 0D	16	0	0	0	0	0	0	0	0	0	0	0	0	0	0	0	0
18	PreTest, EntryTest, ExitTest, TestEvery3Days, PCR 0D	17	0	0	0	0	0	0	0	0	0	0	0	0	0	0	0	0
18	PreTest, EntryTest, ExitTest, TestEvery3Days, PCR 0D	18	0	0	0	0	0	0	0	0	0	0	0	0	0	0	0	0
18	PreTest, EntryTest, ExitTest, TestEvery3Days, PCR 0D	19	0	0	0	0	0	0	0	0	0	0	0	0	0	0	0	0
18	PreTest, EntryTest, ExitTest, TestEvery3Days, PCR 0D	20	0	0	0	0	0	0	0	0	0	0	0	0	0	0	0	0
18	PreTest, EntryTest, ExitTest, TestEvery3Days, PCR 0D	21	0	0	0	0	0	0	0	0	0	0	0	0	0	0	0	0
19	PreTest, EntryTest, ExitTest, TestEvery3Days, Antigen	0	1362.85149894509	30.8633381705941	1302.35935613073	1423.34364175946	3103.3532901435	53.0642279476689	2999.34740336607	3207.35917692093	4466.20478908859	68.3920194616923	4332.15643094368	4600.25314723351	0.2771377902328	0.00309253107533759	0.271076429325138	0.283199151140462
19	PreTest, EntryTest, ExitTest, TestEvery3Days, Antigen	1	382.891722043721	16.0329206079828	351.467197652074	414.316246435367	880.424889030393	27.6910249779246	826.150480073661	934.699297987125	1263.31661107411	35.4232884234631	1193.88696576413	1332.7462563841	0.0818408632867872	0.00185439096917073	0.0782062569872126	0.0854754695863618
19	PreTest, EntryTest, ExitTest, TestEvery3Days, Antigen	2	74.5236163642937	7.28824995376537	60.2386464549136	88.8085862736739	179.006290505546	12.9582405843148	153.608138960289	204.404442050803	253.52990686984	16.4351296863811	221.317052684533	285.742761055147	0.0213176189664288	0.000959867613629929	0.0194362784437141	0.0231989594891435
19	PreTest, EntryTest, ExitTest, TestEvery3Days, Antigen	3	8.30141451062596	2.30484607473094	3.7839162041533	12.8189128170986	24.4007014651484	4.78097513954663	15.029990191637	33.7714127386598	32.7021159757743	5.94590643440853	21.0481393643336	44.3560925872151	0.00406905673398883	0.00045322892875603	0.00318072803362701	0.00495738543435065
19	PreTest, EntryTest, ExitTest, TestEvery3Days, Antigen	4	0.0503153524168951	0.183209624220957	-0.308775511056181	0.409406215889971	0.20294746437985	0.387913026221885	-0.557362067015045	0.963256995774744	0.253262816796745	0.483590271948299	-0.694574116221922	1.20109974981541	0.000400748321859951	0.000140519066218228	0.000125330952072225	0.000676165691647678
19	PreTest, EntryTest, ExitTest, TestEvery3Days, Antigen	5	0.0100166316115861	0.0755875001519825	-0.1381348686863	0.158168131909472	0.0711320306642779	0.208349447400605	-0.337232886240909	0.479496947569464	0.081148662275864	0.246548809037318	-0.402087003437279	0.564384327989007	9.05520291454968e-05	6.46704157593735e-05	-3.62019857428752e-05	0.000217306044033869
19	PreTest, EntryTest, ExitTest, TestEvery3Days, Antigen	6	0.00166746781327352	0.0223124521184251	-0.0420649383388397	0.0453998739653868	0.020718771113982	0.0816117840902674	-0.139240325702942	0.180677867930906	0.0223862389272556	0.0970733447300285	-0.1678775167436	0.212649994598111	9.80468885066861e-05	6.88430758208735e-05	-3.68855401022259e-05	0.000232979317115598
19	PreTest, EntryTest, ExitTest, TestEvery3Days, Antigen	7	0	0	0	0	0.000889616489230885	0.00268172343913833	-0.00436656145148024	0.00614579442994201	0.000889616489230885	0.00268172343913833	-0.00436656145148024	0.00614579442994201	6.32047662668889e-05	5.31851059735726e-05	-4.10380414413133e-05	0.000167447573975091
19	PreTest, EntryTest, ExitTest, TestEvery3Days, Antigen	8	0	0	0	0	0.000265525400627443	0.000436835949632744	-0.000590673060652735	0.00112172386190762	0.000265525400627443	0.000436835949632744	-0.000590673060652735	0.00112172386190762	0.000100392793675135	6.84845666095531e-05	-3.38369568795892e-05	0.000234622544229859
19	PreTest, EntryTest, ExitTest, TestEvery3Days, Antigen	9	0	0	0	0	8.53085006259868e-05	0.000424913704988105	-0.0007475223611507	0.000918139362402673	8.53085006259868e-05	0.000424913704988105	-0.0007475223611507	0.000918139362402673	0.000124220442718731	7.63559145074525e-05	-2.54371497158764e-05	0.000273878035153337
19	PreTest, EntryTest, ExitTest, TestEvery3Days, Antigen	10	0	0	0	0	1.23727876022282e-05	2.44519439229674e-05	-3.55530224867879e-05	6.02985976912442e-05	1.23727876022282e-05	2.44519439229674e-05	-3.55530224867879e-05	6.02985976912442e-05	7.12625056382418e-05	5.97644234905263e-05	-4.58757644031898e-05	0.000188400775679673
19	PreTest, EntryTest, ExitTest, TestEvery3Days, Antigen	11	0	0	0	0	2.63255497186328e-06	9.445623754691e-06	-1.58808675873311e-05	2.11459775310576e-05	2.63255497186328e-06	9.445623754691e-06	-1.58808675873311e-05	2.11459775310576e-05	2.08853150535916e-05	3.15968051823435e-05	-4.10444231038017e-05	8.28150532109849e-05
19	PreTest, EntryTest, ExitTest, TestEvery3Days, Antigen	12	0	0	0	0	3.60793602054799e-07	1.67973678803183e-06	-2.93149050248758e-06	3.65307770659718e-06	3.60793602054799e-07	1.67973678803183e-06	-2.93149050248758e-06	3.65307770659718e-06	4.30107534780102e-06	1.42412728903421e-05	-2.36118195172695e-05	3.22139702128716e-05
19	PreTest, EntryTest, ExitTest, TestEvery3Days, Antigen	13	0	0	0	0	2.6930753032845e-08	3.36581676824185e-07	-6.32769333542557e-07	6.86630839608247e-07	2.6930753032845e-08	3.36581676824185e-07	-6.32769333542557e-07	6.86630839608247e-07	4.25080961224454e-07	4.46286472800368e-06	-8.32213390566277e-06	9.17229582811167e-06
19	PreTest, EntryTest, ExitTest, TestEvery3Days, Antigen	14	0	0	0	0	1.54444563806381e-09	4.8839659385937e-08	-9.41812867583727e-08	9.72701780345003e-08	1.54444563806381e-09	4.8839659385937e-08	-9.41812867583727e-08	9.72701780345003e-08	4.73238370167053e-08	1.49651112591377e-06	-2.88583796977428e-06	2.98048564380769e-06
19	PreTest, EntryTest, ExitTest, TestEvery3Days, Antigen	15	0	0	0	0	0	0	0	0	0	0	0	0	0	0	0	0
19	PreTest, EntryTest, ExitTest, TestEvery3Days, Antigen	16	0	0	0	0	0	0	0	0	0	0	0	0	0	0	0	0
19	PreTest, EntryTest, ExitTest, TestEvery3Days, Antigen	17	0	0	0	0	0	0	0	0	0	0	0	0	0	0	0	0
19	PreTest, EntryTest, ExitTest, TestEvery3Days, Antigen	18	0	0	0	0	0	0	0	0	0	0	0	0	0	0	0	0
19	PreTest, EntryTest, ExitTest, TestEvery3Days, Antigen	19	0	0	0	0	0	0	0	0	0	0	0	0	0	0	0	0
19	PreTest, EntryTest, ExitTest, TestEvery3Days, Antigen	20	0	0	0	0	0	0	0	0	0	0	0	0	0	0	0	0
19	PreTest, EntryTest, ExitTest, TestEvery3Days, Antigen	21	0	0	0	0	0	0	0	0	0	0	0	0	0	0	0	0
20	PreTest, EntryTest, ExitTest, TestEvery3Days, PCR 1D	0	1523.70951862004	32.9455066798114	1459.13632552761	1588.28271171247	3469.57912819078	54.5572161842863	3362.64698446958	3576.51127191198	4993.28864681082	70.9300362551337	4854.26577575076	5132.31151787089	0.260367363816908	0.00303027314275307	0.254428028457112	0.266306699176704
20	PreTest, EntryTest, ExitTest, TestEvery3Days, PCR 1D	1	1426.54663169172	31.560618854658	1364.68781873659	1488.40544464685	3466.64820612717	54.5401550715818	3359.74950218687	3573.54691006747	4893.19483781889	70.5157954121611	4754.98387881105	5031.40579682673	0.230636010218037	0.00289657977149199	0.224958713865913	0.236313306570161
20	PreTest, EntryTest, ExitTest, TestEvery3Days, PCR 1D	2	216.889004709419	12.2430398535803	192.892646596402	240.885362822437	550.118966430114	22.0710826516717	506.859644432837	593.378288427391	767.007971139533	28.2883937523975	711.562719384834	822.453222894232	0.0350981422944705	0.00125638859615865	0.0326356206459996	0.0375606639429415
20	PreTest, EntryTest, ExitTest, TestEvery3Days, PCR 1D	3	32.6955721440308	4.35060160503778	24.1683929981568	41.2227512899049	106.135276036197	9.55542435904338	87.4066442924717	124.863907779922	138.830848180228	11.7792179967221	115.743580906652	161.918115453803	0.00661054994074544	0.000534952155150238	0.00556204371665098	0.00765905616483991
20	PreTest, EntryTest, ExitTest, TestEvery3Days, PCR 1D	4	3.29107750414846	1.32799582769596	0.688205681864385	5.89394932643254	13.0965325275775	3.38687363598816	6.45826020104075	19.7348048541143	16.387610031726	4.11474835244872	8.32270326092651	24.4525168025255	0.000999039428488417	0.000220104983354653	0.000567633661113298	0.00143044519586354
20	PreTest, EntryTest, ExitTest, TestEvery3Days, PCR 1D	5	0.022025777467312	0.114769140666512	-0.202921738239051	0.246973293173675	0.0861407184808545	0.277741227231345	-0.458232086892581	0.63051352385429	0.108166495948167	0.342367731817815	-0.562874258414751	0.779207250311084	2.44347529754241e-05	3.27701274771727e-05	-3.97946968798344e-05	8.86642028306827e-05
20	PreTest, EntryTest, ExitTest, TestEvery3Days, PCR 1D	6	0.00627426103897728	0.0674608373369936	-0.12594898014153	0.138497502219485	0.015819401744116	0.0949787515828199	-0.170338951358211	0.201977754846443	0.0220936627830933	0.136176874074327	-0.244813010402587	0.289000335968774	3.00076790789996e-05	3.69157305747301e-05	-4.23471528474715e-05	0.000102362511005471
20	PreTest, EntryTest, ExitTest, TestEvery3Days, PCR 1D	7	0.000192623729414032	0.00609129716344313	-0.0117463187109345	0.0121315661697626	0.00291869198082175	0.0263261479794277	-0.0486805580588565	0.0545179420205	0.00311131571023578	0.0320744252984722	-0.0597545578747698	0.0659771892952413	5.45355854599604e-05	4.86083014026303e-05	-4.07366852891949e-05	0.000149807856209116
20	PreTest, EntryTest, ExitTest, TestEvery3Days, PCR 1D	8	0	0	0	0	7.15057271164927e-05	0.000345584522338195	-0.00060583993666637	0.000748851390899356	7.15057271164927e-05	0.000345584522338195	-0.00060583993666637	0.000748851390899356	2.4426467866666e-05	3.50210327017278e-05	-4.42147562287205e-05	9.30676919620525e-05
20	PreTest, EntryTest, ExitTest, TestEvery3Days, PCR 1D	9	0	0	0	0	2.18732533682695e-05	6.51895284785098e-05	-0.00010589822244961	0.000149644729186149	2.18732533682695e-05	6.51895284785098e-05	-0.00010589822244961	0.000149644729186149	3.68125344296247e-05	4.10665658483901e-05	-4.367793463322e-05	0.000117303003492469
20	PreTest, EntryTest, ExitTest, TestEvery3Days, PCR 1D	10	0	0	0	0	4.44270361587515e-06	1.09025997529794e-05	-1.69263918999645e-05	2.58117991317148e-05	4.44270361587515e-06	1.09025997529794e-05	-1.69263918999645e-05	2.58117991317148e-05	2.8546704090191e-05	3.64884332732366e-05	-4.29706251253528e-05	0.000100064033305735
20	PreTest, EntryTest, ExitTest, TestEvery3Days, PCR 1D	11	0	0	0	0	5.82680804675739e-07	2.53940766223328e-06	-4.39455821330148e-06	5.55991982265296e-06	5.82680804675739e-07	2.53940766223328e-06	-4.39455821330148e-06	5.55991982265296e-06	6.94601688101442e-06	1.76492477400825e-05	-2.76465086895473e-05	4.15385424515761e-05
20	PreTest, EntryTest, ExitTest, TestEvery3Days, PCR 1D	12	0	0	0	0	5.21426378928017e-08	5.77762186944913e-07	-1.08027124851923e-06	1.18455652430483e-06	5.21426378928017e-08	5.77762186944913e-07	-1.08027124851923e-06	1.18455652430483e-06	7.579661107931e-07	6.31530135443329e-06	-1.16200245438961e-05	1.31359567654823e-05
20	PreTest, EntryTest, ExitTest, TestEvery3Days, PCR 1D	13	0	0	0	0	6.85698072119885e-09	1.28826604971545e-07	-2.4564316502303e-07	2.59357126465428e-07	6.85698072119885e-09	1.28826604971545e-07	-2.4564316502303e-07	2.59357126465428e-07	1.4201571465285e-07	2.59029939805928e-06	-4.93497110554334e-06	5.21900253484904e-06
20	PreTest, EntryTest, ExitTest, TestEvery3Days, PCR 1D	14	0	0	0	0	0	0	0	0	0	0	0	0	0	0	0	0
20	PreTest, EntryTest, ExitTest, TestEvery3Days, PCR 1D	15	0	0	0	0	0	0	0	0	0	0	0	0	0	0	0	0
20	PreTest, EntryTest, ExitTest, TestEvery3Days, PCR 1D	16	0	0	0	0	0	0	0	0	0	0	0	0	0	0	0	0
20	PreTest, EntryTest, ExitTest, TestEvery3Days, PCR 1D	17	0	0	0	0	0	0	0	0	0	0	0	0	0	0	0	0
20	PreTest, EntryTest, ExitTest, TestEvery3Days, PCR 1D	18	0	0	0	0	0	0	0	0	0	0	0	0	0	0	0	0
20	PreTest, EntryTest, ExitTest, TestEvery3Days, PCR 1D	19	0	0	0	0	0	0	0	0	0	0	0	0	0	0	0	0
20	PreTest, EntryTest, ExitTest, TestEvery3Days, PCR 1D	20	0	0	0	0	0	0	0	0	0	0	0	0	0	0	0	0
20	PreTest, EntryTest, ExitTest, TestEvery3Days, PCR 1D	21	0	0	0	0	0	0	0	0	0	0	0	0	0	0	0	0
21	PreTest, EntryTest, ExitTest, TestEvery3Days, PCR 2D	0	1630.22165012274	33.7603829062971	1564.0512996264	1696.39200061908	3722.80155275539	56.9081962207062	3611.2614881628	3834.34161734797	5353.02320287813	72.8240402932687	5210.28808390332	5495.75832185294	0.257405687351024	0.00296949840594587	0.25158547047537	0.263225904226678
21	PreTest, EntryTest, ExitTest, TestEvery3Days, PCR 2D	1	1520.56560046396	32.055846752093	1457.73614082986	1583.39506009807	3712.72174634912	56.6420327068357	3601.70336224373	3823.74013045452	5233.28734681309	72.041186606122	5092.08662106509	5374.48807256109	0.235730973699885	0.00285305954055769	0.230138977000392	0.241322970399378
21	PreTest, EntryTest, ExitTest, TestEvery3Days, PCR 2D	2	1035.40276746686	24.5647568449124	987.25584405083	1083.54969088289	3313.97642117568	52.4083803594242	3211.25599567121	3416.69684668015	4349.37918864254	65.1437425691856	4221.69745320694	4477.06092407814	0.198704481793161	0.0026926149484973	0.193426956494106	0.203982007092215
21	PreTest, EntryTest, ExitTest, TestEvery3Days, PCR 2D	3	132.318882600859	8.15686176216554	116.331433547015	148.306331654704	502.318614316855	21.5004630332443	460.177706771697	544.459521862014	634.637496917715	25.6981649039891	584.269093705896	685.005900129533	0.0293027028333966	0.0011520897519278	0.0270446069196181	0.0315607987471751
21	PreTest, EntryTest, ExitTest, TestEvery3Days, PCR 2D	4	13.5919088972112	2.53014870011384	8.63281744498806	18.5510003494343	65.5416606943486	7.25747232598292	51.317014935422	79.7663064532751	79.1335695915597	8.56856611296996	62.3391800101386	95.9279591729809	0.00457737461309287	0.000467700029948146	0.0036606825543945	0.00549406667179123
21	PreTest, EntryTest, ExitTest, TestEvery3Days, PCR 2D	5	1.11331253138051	0.716565697741421	-0.291156236192673	2.5177812989537	6.32785419703794	2.15989817513901	2.09445377376548	10.5612546203104	7.44116672841845	2.52998423420695	2.48239762937282	12.3999358274641	0.000708539974242317	0.000178706610636541	0.000358275017394696	0.00105880493108994
21	PreTest, EntryTest, ExitTest, TestEvery3Days, PCR 2D	6	0.00845741573851416	0.0500734047666802	-0.089686457604179	0.106601289081207	0.0494943458526458	0.195855380994671	-0.334382200896909	0.4333708926022	0.05795176159116	0.231305673418305	-0.395407358308718	0.511310881491038	1.66856825522476e-05	2.75916309207437e-05	-3.73939140524102e-05	7.07652791569053e-05
21	PreTest, EntryTest, ExitTest, TestEvery3Days, PCR 2D	7	0.00139607651860578	0.0202235427062578	-0.0382420671856595	0.0410342202228711	0.0111044096661902	0.0900912233901445	-0.165474388178493	0.187683207510873	0.012500486184796	0.101656523511382	-0.186746299897513	0.211747272267105	2.83065040267361e-05	3.58828642017824e-05	-4.20239098087573e-05	9.86369178622295e-05
21	PreTest, EntryTest, ExitTest, TestEvery3Days, PCR 2D	8	0	0	0	0	0.00138148811789078	0.0304341373155311	-0.0582694210205501	0.0610323972563316	0.00138148811789078	0.0304341373155311	-0.0582694210205501	0.0610323972563316	6.00035543463736e-05	5.39093405331625e-05	-4.56587530986248e-05	0.000165665861791372
21	PreTest, EntryTest, ExitTest, TestEvery3Days, PCR 2D	9	0	0	0	0	1.13432170788502e-05	3.80181816555759e-05	-6.31724189660787e-05	8.5858853123779e-05	1.13432170788502e-05	3.80181816555759e-05	-6.31724189660787e-05	8.5858853123779e-05	2.26345610282779e-05	3.1692061602001e-05	-3.9481879711644e-05	8.47510017681998e-05
21	PreTest, EntryTest, ExitTest, TestEvery3Days, PCR 2D	10	0	0	0	0	3.69601734424052e-06	1.06619824797111e-05	-1.72014683159931e-05	2.45935030044742e-05	3.69601734424052e-06	1.06619824797111e-05	-1.72014683159931e-05	2.45935030044742e-05	1.99368579456435e-05	3.14214247718729e-05	-4.16491346072273e-05	8.15228504985144e-05
21	PreTest, EntryTest, ExitTest, TestEvery3Days, PCR 2D	11	0	0	0	0	9.47151843025676e-07	3.5176615753263e-06	-5.94746484461388e-06	7.84176853066523e-06	9.47151843025676e-07	3.5176615753263e-06	-5.94746484461388e-06	7.84176853066523e-06	8.83922273988436e-06	2.0056998362948e-05	-3.04724940514937e-05	4.81509395312625e-05
21	PreTest, EntryTest, ExitTest, TestEvery3Days, PCR 2D	12	0	0	0	0	8.14462846776764e-08	5.79527876286852e-07	-1.05442835284455e-06	1.21732092219991e-06	8.14462846776764e-08	5.79527876286852e-07	-1.05442835284455e-06	1.21732092219991e-06	1.18153438567954e-06	7.38247105466695e-06	-1.32881088814677e-05	1.56511776528268e-05
21	PreTest, EntryTest, ExitTest, TestEvery3Days, PCR 2D	13	0	0	0	0	3.49208371362652e-09	1.1042938315039e-07	-2.12949507261137e-07	2.1993367468839e-07	3.49208371362652e-09	1.1042938315039e-07	-2.12949507261137e-07	2.1993367468839e-07	4.68055230517201e-08	1.48012059918951e-06	-2.85423085135971e-06	2.94784189746315e-06
21	PreTest, EntryTest, ExitTest, TestEvery3Days, PCR 2D	14	0	0	0	0	0	0	0	0	0	0	0	0	0	0	0	0
21	PreTest, EntryTest, ExitTest, TestEvery3Days, PCR 2D	15	0	0	0	0	0	0	0	0	0	0	0	0	0	0	0	0
21	PreTest, EntryTest, ExitTest, TestEvery3Days, PCR 2D	16	0	0	0	0	0	0	0	0	0	0	0	0	0	0	0	0
21	PreTest, EntryTest, ExitTest, TestEvery3Days, PCR 2D	17	0	0	0	0	0	0	0	0	0	0	0	0	0	0	0	0
21	PreTest, EntryTest, ExitTest, TestEvery3Days, PCR 2D	18	0	0	0	0	0	0	0	0	0	0	0	0	0	0	0	0
21	PreTest, EntryTest, ExitTest, TestEvery3Days, PCR 2D	19	0	0	0	0	0	0	0	0	0	0	0	0	0	0	0	0
21	PreTest, EntryTest, ExitTest, TestEvery3Days, PCR 2D	20	0	0	0	0	0	0	0	0	0	0	0	0	0	0	0	0
21	PreTest, EntryTest, ExitTest, TestEvery3Days, PCR 2D	21	0	0	0	0	0	0	0	0	0	0	0	0	0	0	0	0
