# Supplementary material for: Border Control for Infectious Respiratory Disease Pandemics: A Modelling Study for H1N1 and Four Strains of SARS-CoV-2
Source: Viruses. 2023 Apr 16;15(4):978. doi: 10.3390/v15040978 (PMC10144227; doi:10.3390/v15040978)
Supplement: Supplementary file 1 [file viruses-15-00978-s001.zip › Table S1.3 - Outcomes for Delta (Unvac).csv]

StrategyNo	StrategyDescription	QDays	TR_Sympt_Mean	TR_Sympt_SD	TR_Sympt_2_5th_Percentile	TR_Sympt_97_5th_Percentile	TR_NoSympt_Mean	TR_NoSympt_SD	TR_NoSympt_2_5th_Percentile	TR_NoSympt_97_5th_Percentile	TR_Total_Mean	TR_Total_SD	TR_Total_2_5th_Percentile	TR_Total_97_5th_Percentile	Missed_Proportion_Mean	Missed_Proportion_SD	Missed_Proportion_2_5th_Percentile	Missed_Proportion_97_5th_Percentile
1	Quarantine Only	0	3814.65046081912	51.3742713709741	3713.95688893201	3915.34403270623	10205.8949477384	94.7595836631546	10020.1661637586	10391.6237317181	14020.5454085575	118.402935692613	13788.4756545999	14252.615162515	0.94676041128435	0.00145873469185437	0.943901291288316	0.949619531280385
1	Quarantine Only	1	2713.61578195621	43.0628090666114	2629.21267618565	2798.01888772677	7813.84064808141	81.9732537469563	7653.17307073737	7974.50822542544	10527.4564300376	101.471702079537	10328.5718939617	10726.3409661135	0.81372753267482	0.00263990331829214	0.808553322170967	0.818901743178673
1	Quarantine Only	2	1614.19768556504	32.2890369023867	1550.91117323636	1677.48419789372	5420.52267483542	66.862507559297	5289.4721600192	5551.57318965164	7034.72036040046	82.5129513135867	6872.99497582583	7196.44574497509	0.680770764105481	0.0030635612326329	0.674766184089521	0.686775344121442
1	Quarantine Only	3	684.126298821159	20.5723283957274	643.804535165533	724.448062476785	3037.55804330795	47.9395959398993	2943.59643526575	3131.51965135016	3721.68434212911	59.1792508816723	3605.69301040104	3837.67567385719	0.554138690483534	0.00339474263366584	0.547484994921549	0.560792386045519
1	Quarantine Only	4	185.201653784826	10.0313146625568	165.540277046215	204.863030523437	1224.26616969973	28.5576363921338	1168.29320237115	1280.23913702831	1409.46782348455	34.1918060731888	1342.4518835811	1476.483763388	0.454444832895645	0.0034090368977423	0.44776312057607	0.46112654521522
1	Quarantine Only	5	39.3903681680934	4.5591831118203	30.4543692689256	48.3263670672612	395.92688011281	14.0603826708263	368.36853007799	423.485230147629	435.317248280903	16.4714356218809	403.033234462016	467.60126209979	0.38579599429947	0.00325393264185667	0.379418286321431	0.392173702277509
1	Quarantine Only	6	7.78765116946136	1.94272201920445	3.97991601182063	11.5953863271021	112.738153354141	6.50653517863816	99.9853444040105	125.490962304272	120.525804523603	7.50406325914213	105.817840535684	135.233768511521	0.328892995971312	0.00316024270949628	0.3226989202607	0.335087071681925
1	Quarantine Only	7	1.52566833451383	0.835292142153468	-0.11150426410697	3.16284093313462	29.9187366345337	3.00639990824518	24.0261928143731	35.8112804546942	31.4444049690475	3.44100481066289	24.7000355401482	38.1887743979468	0.274812709290601	0.00301108234802267	0.268910987888476	0.280714430692725
1	Quarantine Only	8	0.324034183857855	0.384915570934541	-0.430400335173846	1.07846870288956	7.75430919428691	1.36237175289128	5.08406055862	10.4245578299538	8.07834337814476	1.56662587642252	5.00775666035662	11.1489300959329	0.221407377620906	0.00275787774532133	0.216001937240077	0.226812818001736
1	Quarantine Only	9	0.070928446592307	0.185940066459251	-0.293514083667825	0.435370976852439	2.0342886271896	0.634069076937665	0.79151323639178	3.27706401798743	2.10521707378191	0.7365527209765	0.66157374066797	3.54886040689585	0.168127448677704	0.00245738722417078	0.163310969718329	0.172943927637079
1	Quarantine Only	10	0.0142293980697869	0.0803291649849557	-0.143215765300726	0.1716745614403	0.548236557009433	0.302462557755071	-0.0445900561905058	1.14106317020937	0.56246595507922	0.346193920367289	-0.116074128840666	1.24100603899911	0.116238323314146	0.00205637628288155	0.112207825799698	0.120268820828594
1	Quarantine Only	11	0.00366391945184164	0.0408011972443866	-0.0763064271471561	0.0836342660508394	0.156404124769956	0.152334557385989	-0.142171607706583	0.454979857246494	0.160068044221797	0.177116716203533	-0.187080719537128	0.507216807980723	0.0705207007239409	0.00164167525056094	0.0673030172328415	0.0737383842150404
1	Quarantine Only	12	0.00112893323982264	0.0183775790434166	-0.0348911216852739	0.0371489881649192	0.0483962155717549	0.0853142240987038	-0.118819663661705	0.215612094805214	0.0495251488115776	0.0976855481875208	-0.141938525635963	0.240988823259118	0.0373286030255108	0.00122034500040509	0.0349367268247168	0.0397204792263047
1	Quarantine Only	13	0.000530108238405989	0.012213641903822	-0.0234086298930852	0.0244688463698972	0.0163333931565215	0.0505487491835753	-0.0827421552432861	0.115408941556329	0.0168635013949275	0.0583582113419918	-0.0975185928353764	0.131245595625231	0.0176859660881861	0.000875561664825291	0.0159698652251285	0.0194020669512437
1	Quarantine Only	14	0	0	0	0	0.00555787773136803	0.0269579113093532	-0.0472796284349643	0.0583953838977004	0.00555787773136803	0.0269579113093532	-0.0472796284349643	0.0583953838977004	0.00786665375881438	0.000586221626007182	0.00671765937184031	0.00901564814578846
1	Quarantine Only	15	0	0	0	0	0.00194257089366468	0.00649184782616135	-0.0107814508456116	0.0146665926329409	0.00194257089366468	0.00649184782616135	-0.0107814508456116	0.0146665926329409	0.00343962579619161	0.000386693250453662	0.00268170702530243	0.00419754456708079
1	Quarantine Only	16	0	0	0	0	0.00071256674286933	0.00100530743779468	-0.00125783583520824	0.0026829693209469	0.00071256674286933	0.00100530743779468	-0.00125783583520824	0.0026829693209469	0.00153576470361447	0.000256885524394765	0.00103226907580073	0.00203926033142821
1	Quarantine Only	17	0	0	0	0	0.000285211627514348	0.000266067292579586	-0.00023628026594164	0.000806703520970337	0.000285211627514348	0.000266067292579586	-0.00023628026594164	0.000806703520970337	0.000698721101391963	0.000168744226866957	0.000367982416732726	0.0010294597860512
1	Quarantine Only	18	0	0	0	0	0.000120252960935087	0.000122231155361037	-0.000119320103572546	0.00035982602544272	0.000120252960935087	0.000122231155361037	-0.000119320103572546	0.00035982602544272	0.000336785970093932	0.000120817125159239	9.99844047818238e-05	0.000573587535406041
1	Quarantine Only	19	0	0	0	0	5.18878055287253e-05	6.0887516997983e-05	-6.74517277873215e-05	0.000171227338844772	5.18878055287253e-05	6.0887516997983e-05	-6.74517277873215e-05	0.000171227338844772	0.000170189146570987	8.51394716521924e-05	3.31578213269031e-06	0.000337062511009284
1	Quarantine Only	20	0	0	0	0	2.25131332850997e-05	3.05303733836076e-05	-3.73263985467713e-05	8.23526651169706e-05	2.25131332850997e-05	3.05303733836076e-05	-3.73263985467713e-05	8.23526651169706e-05	8.89737119800054e-05	6.25008135178315e-05	-3.35278825149443e-05	0.000211475306474955
1	Quarantine Only	21	0	0	0	0	9.65387825340564e-06	1.52240718106054e-05	-2.01853024953809e-05	3.94930590021922e-05	9.65387825340564e-06	1.52240718106054e-05	-2.01853024953809e-05	3.94930590021922e-05	4.79997191175042e-05	4.61652516977719e-05	-4.24841742101288e-05	0.000138483612445137
2	PreTest, EntryTest, PCR 0D	0	1353.58639718656	31.9847651638848	1290.89625746535	1416.27653690778	2958.73014122984	51.8092978129488	2857.18391751646	3060.27636494322	4312.3165384164	68.2555473512118	4178.53566560802	4446.09741122477	0.234167301536621	0.00281513161637876	0.228649643568519	0.239684959504724
2	PreTest, EntryTest, PCR 0D	1	1328.88373440278	31.5558072785624	1267.0343521368	1390.73311666876	2958.03887196271	51.8043325814358	2856.5023801031	3059.57536382232	4286.92260636549	68.2309766141322	4153.18989220179	4420.65532052919	0.201196076163341	0.00269783322220206	0.195908323047825	0.206483829278857
2	PreTest, EntryTest, PCR 0D	2	1055.07328119257	26.4327957613618	1003.26500150031	1106.88156088484	2869.16102800313	50.5600637603068	2770.06330303292	2968.25875297333	3924.2343091957	64.5334537792961	3797.74873978828	4050.71987860312	0.16891950625225	0.00252054812365278	0.163979231929891	0.17385978057461
2	PreTest, EntryTest, PCR 0D	3	518.141646624893	17.8535245741984	483.148738459464	553.134554790322	1993.53240948154	40.6054330081643	1913.94576078553	2073.11905817754	2511.67405610643	50.626200924055	2412.44670229528	2610.90140991758	0.121549801592071	0.00219179198525391	0.117253889300973	0.125845713883169
2	PreTest, EntryTest, PCR 0D	4	145.662410153167	8.82132436009233	128.372614407386	162.952205898948	870.940735326905	24.9652694592983	822.008807186681	919.87266346713	1016.60314548007	29.9715909972965	957.858827125371	1075.34746383477	0.0836298987981886	0.00186245038809098	0.0799794960375303	0.0872803015588469
2	PreTest, EntryTest, PCR 0D	5	30.9336878385875	4.00224790883891	23.0892819372633	38.7780937399118	290.956216554442	12.5046716102829	266.447060198287	315.465372910596	321.889904393029	14.5945234998921	293.284638333241	350.495170452818	0.0702145146338762	0.00168072069368386	0.0669203020742558	0.0735087271934966
2	PreTest, EntryTest, PCR 0D	6	6.0886031623138	1.71536121295364	2.72649518492467	9.45071113970292	83.9039933159561	5.81825256617521	72.5002182862527	95.3077683456595	89.9925964782699	6.69535786958322	76.8696950538867	103.115497902653	0.0668920653556638	0.00164069164592925	0.0636763097296425	0.0701078209816852
2	PreTest, EntryTest, PCR 0D	7	1.18749461005306	0.737519944837646	-0.258044481828729	2.63303370193484	22.2918194197083	2.59782892153878	17.2000747334922	27.3835641059243	23.4793140297613	2.96789005043528	17.6622495309082	29.2963785286145	0.0661170523935906	0.00162965573283918	0.0629229271572258	0.0693111776299554
2	PreTest, EntryTest, PCR 0D	8	0.25114833719584	0.339684210296984	-0.414632714986249	0.916929389377929	5.73255230445493	1.16454662488344	3.45004091968338	8.01506368922648	5.98370064165077	1.33274048614025	3.37152928881587	8.59587199448567	0.065670420033923	0.00162971275666832	0.0624761830308531	0.068864657036993
2	PreTest, EntryTest, PCR 0D	9	0.0513647361801803	0.15255538921841	-0.247643826687904	0.350373299048264	1.48008020329451	0.538634071294333	0.424357423557621	2.53580298303141	1.53144493947469	0.614275323512281	0.327465305390623	2.73542457355876	0.0629495452732557	0.00160271011809373	0.059808233441792	0.0660908571047194
2	PreTest, EntryTest, PCR 0D	10	0.00942263331398618	0.0650503336254145	-0.118076020591826	0.136921287219799	0.389628077665141	0.249270480350439	-0.0989420638217199	0.878198219152002	0.399050710979127	0.281484152596692	-0.152658228110388	0.950759650068643	0.0534473557898191	0.00147453895968269	0.0505572594288411	0.0563374521507972
2	PreTest, EntryTest, PCR 0D	11	0.00273713543331972	0.0339805894807275	-0.0638648199489062	0.0693390908155456	0.110173623546693	0.129062631622729	-0.142789134433855	0.363136381527242	0.112910758980013	0.147060275883045	-0.175327381750755	0.401148899710782	0.0373631940700733	0.0012400698615013	0.0349326571415308	0.0397937309986159
2	PreTest, EntryTest, PCR 0D	12	0.0007585574422447	0.0141816658106864	-0.0270375075467006	0.02855462243119	0.0335026514146062	0.0764124962533489	-0.116265841241958	0.18327114407117	0.0342612088568509	0.0863291291472981	-0.134943884271853	0.203466301985555	0.0214092741007599	0.000947255698602444	0.0195526529314991	0.0232658952700207
2	PreTest, EntryTest, PCR 0D	13	0.000530108238405989	0.012213641903822	-0.0234086298930852	0.0244688463698972	0.0114901267355385	0.0496499771707317	-0.0858238285190956	0.108804081990173	0.0120202349739445	0.0575947507102308	-0.100865476418108	0.124905946365997	0.0105127786199405	0.0006840274970705	0.00917208472568234	0.0118534725141987
2	PreTest, EntryTest, PCR 0D	14	0	0	0	0	0.00380175729517006	0.0268719428653258	-0.0488672507208686	0.0564707653112087	0.00380175729517006	0.0268719428653258	-0.0488672507208686	0.0564707653112087	0.00469265856739411	0.000454534522575909	0.00380177090314533	0.00558354623164289
2	PreTest, EntryTest, PCR 0D	15	0	0	0	0	0.00125944585166099	0.00645973857496355	-0.0114016417552676	0.0139205334585896	0.00125944585166099	0.00645973857496355	-0.0114016417552676	0.0139205334585896	0.00202642210703516	0.000298775855714174	0.00144082142983538	0.00261202278423495
2	PreTest, EntryTest, PCR 0D	16	0	0	0	0	0.000431575820084369	0.00096055248533733	-0.0014511070511768	0.00231425869134554	0.000431575820084369	0.00096055248533733	-0.0014511070511768	0.00231425869134554	0.0008779527590375	0.000201797636368424	0.000482429391755389	0.00127347612631961
2	PreTest, EntryTest, PCR 0D	17	0	0	0	0	0.000165527539528098	0.00022066909484045	-0.000266983886359184	0.000598038965415381	0.000165527539528098	0.00022066909484045	-0.000266983886359184	0.000598038965415381	0.000383652524859662	0.000130646477778326	0.000127585428414143	0.00063971962130518
2	PreTest, EntryTest, PCR 0D	18	0	0	0	0	6.81549979178023e-05	9.65717237885814e-05	-0.000121125580707817	0.000257435576543422	6.81549979178023e-05	9.65717237885814e-05	-0.000121125580707817	0.000257435576543422	0.000178098517104497	8.66913048560374e-05	8.18355958666359e-06	0.00034801347462233
2	PreTest, EntryTest, PCR 0D	19	0	0	0	0	2.90155063874029e-05	4.76774278033904e-05	-6.44322521072423e-05	0.000122463264882048	2.90155063874029e-05	4.76774278033904e-05	-6.44322521072423e-05	0.000122463264882048	8.59177791452344e-05	5.8528940057764e-05	-2.8798943367983e-05	0.000200634501658452
2	PreTest, EntryTest, PCR 0D	20	0	0	0	0	1.2558449454206e-05	2.37754324569215e-05	-3.40413981613602e-05	5.91582970697722e-05	1.2558449454206e-05	2.37754324569215e-05	-3.40413981613602e-05	5.91582970697722e-05	4.29775019691663e-05	4.26175898864385e-05	-4.05529742082533e-05	0.000126507978146586
2	PreTest, EntryTest, PCR 0D	21	0	0	0	0	5.45911186538678e-06	1.18536535522277e-05	-1.77740490969795e-05	2.8692272827753e-05	5.45911186538678e-06	1.18536535522277e-05	-1.77740490969795e-05	2.8692272827753e-05	2.32896442384176e-05	3.21140653308234e-05	-3.96539238099963e-05	8.62332122868315e-05
3	PreTest, EntryTest, Antigen	0	1515.49903815126	34.0910587423324	1448.68056301629	1582.31751328623	3316.21576515955	55.2189156555176	3207.98669047474	3424.44483984437	4831.71480331082	71.5181421683963	4691.53924466076	4971.89036196087	0.271492357452099	0.00296036373608734	0.265690044529368	0.27729467037483
3	PreTest, EntryTest, Antigen	1	1483.35856046243	33.4905010963163	1417.71717831365	1548.99994261121	3315.41804611902	55.2188104245948	3207.18917768681	3423.64691455122	4798.77660658145	71.4717154633783	4658.69204427323	4938.86116888967	0.232396222565368	0.00288550878738867	0.226740625342086	0.23805181978865
3	PreTest, EntryTest, Antigen	2	1165.04812555885	27.6610635304941	1110.83244103908	1219.26381007862	3200.40053636154	53.8343028964762	3094.88530268445	3305.91577003864	4365.44866192039	67.5222890823969	4233.1049753189	4497.79234852189	0.192343711675427	0.00264802944921938	0.187153573954957	0.197533849395897
3	PreTest, EntryTest, Antigen	3	563.86936489314	18.6192341942234	527.375665872463	600.363063913818	2190.48318701371	43.2266024957801	2105.75904612198	2275.20732790544	2754.35255190685	53.5383208758984	2649.41744299009	2859.28766082361	0.136335418526906	0.00234408161581633	0.131741018559906	0.140929818493906
3	PreTest, EntryTest, Antigen	4	158.042317686477	9.30967709357485	139.79535058307	176.289284789883	951.461161101287	26.7013417594066	899.12653125285	1003.79579094972	1109.50347878776	31.9994031674225	1046.78464857962	1172.22230899591	0.0936929320550026	0.00200372089151669	0.0897656391076299	0.0976202250023753
3	PreTest, EntryTest, Antigen	5	33.7253804377945	4.21411546825696	25.4657141200108	41.9850467555781	317.340569196771	13.1961586298022	291.476098282359	343.205040111184	351.065949634566	15.3699898993689	320.940769431803	381.191129837329	0.0787322943880396	0.00182054682224306	0.0751640226164432	0.082300566159636
3	PreTest, EntryTest, Antigen	6	6.69001023947991	1.78735491844951	3.18679459931887	10.193225879641	91.5530915243472	6.14777794729531	79.5034467476484	103.602736301046	98.2431017638271	7.05016548234809	84.4247774184248	112.061426109229	0.0750141621413034	0.00178228239653099	0.0715208886441027	0.0785074356385042
3	PreTest, EntryTest, Antigen	7	1.32289832062396	0.776344339740342	-0.198736585267113	2.84453322651503	24.3662411574177	2.76431825302228	18.948177381494	29.7843049333414	25.6891394780416	3.15912610456882	19.4972523130868	31.8810266429965	0.0741381976065066	0.00176906340961843	0.0706708333236545	0.0776055618893587
3	PreTest, EntryTest, Antigen	8	0.278536545205452	0.359249899188061	-0.425593257203147	0.982666347614051	6.27429769146874	1.22633476120355	3.87068155950979	8.67791382342769	6.55283423667419	1.40686971895751	3.79536958751748	9.3102988858309	0.0735993892119968	0.00177127981503673	0.0701276807745248	0.0770710976494688
3	PreTest, EntryTest, Antigen	9	0.0591692569585847	0.165896158207873	-0.265987213128847	0.384325727046016	1.62467879620624	0.579391181979668	0.489072079526086	2.76028551288639	1.68384805316482	0.667480385998366	0.375586496608022	2.99210960972162	0.0703428427921697	0.00173081818961677	0.0669504391405209	0.0737352464438186
3	PreTest, EntryTest, Antigen	10	0.012752143913036	0.0766752859780136	-0.137531416603871	0.163035704429943	0.430088945171241	0.27120861891804	-0.101479947908117	0.961657838250599	0.442841089084277	0.311380352764549	-0.16746440233424	1.05314658050279	0.0593561838115607	0.00156959849603382	0.0562797707593344	0.062432596863787
3	PreTest, EntryTest, Antigen	11	0.00303753442052753	0.0352600893566315	-0.0660722407184701	0.0721473095595252	0.120139254489717	0.135427772963895	-0.145299180519516	0.385577689498951	0.123176788910245	0.154095546390135	-0.178850482014419	0.425204059834909	0.0412175403521681	0.00130257749343941	0.0386644884650269	0.0437705922393093
3	PreTest, EntryTest, Antigen	12	0.0007585574422447	0.0141816658106864	-0.0270375075467006	0.02855462243119	0.0366402380984299	0.0816299019123029	-0.123354369649684	0.196634845846544	0.0373987955406746	0.0909667515417101	-0.140896037481077	0.215693628562427	0.0235242137415724	0.000996383607870363	0.0215713018701465	0.0254771256129983
3	PreTest, EntryTest, Antigen	13	0.000530108238405989	0.012213641903822	-0.0234086298930852	0.0244688463698972	0.0125053362083672	0.0504889541972755	-0.0864530140182927	0.111463686435027	0.0130354444467732	0.0583151711618687	-0.10126229103049	0.127333179924036	0.0115107419589549	0.000718518765080771	0.0101024451793966	0.0129190387385132
3	PreTest, EntryTest, Antigen	14	0	0	0	0	0.00412267989385149	0.0269413610368727	-0.0486823877384189	0.0569277475261219	0.00412267989385149	0.0269413610368727	-0.0486823877384189	0.0569277475261219	0.00513088735297742	0.00047954078526985	0.00419098741384851	0.00607078729210632
3	PreTest, EntryTest, Antigen	15	0	0	0	0	0.00137076286647361	0.00647308902977207	-0.0113164916318796	0.0140580173648269	0.00137076286647361	0.00647308902977207	-0.0113164916318796	0.0140580173648269	0.00221024081430007	0.000313431999356671	0.00159591409556099	0.00282456753303914
3	PreTest, EntryTest, Antigen	16	0	0	0	0	0.00047453285412301	0.000971364058539864	-0.00142934070061512	0.00237840640886114	0.00047453285412301	0.000971364058539864	-0.00142934070061512	0.00237840640886114	0.00095806384079735	0.000207041244454555	0.000552263001666421	0.00136386467992828
3	PreTest, EntryTest, Antigen	17	0	0	0	0	0.000183386022264714	0.000231499983525217	-0.00027035394544471	0.000637125989974139	0.000183386022264714	0.000231499983525217	-0.00027035394544471	0.000637125989974139	0.000419396143763707	0.000135408762698213	0.000153994968875209	0.000684797318652204
3	PreTest, EntryTest, Antigen	18	0	0	0	0	7.59254961668121e-05	0.000102890798628039	-0.000125740469144145	0.000277591461477769	7.59254961668121e-05	0.000102890798628039	-0.000125740469144145	0.000277591461477769	0.000194329704184171	9.0654131655168e-05	1.66476061400422e-05	0.000372011802228301
3	PreTest, EntryTest, Antigen	19	0	0	0	0	3.25047720101982e-05	5.10289497345068e-05	-6.75119694694352e-05	0.000132521513489832	3.25047720101982e-05	5.10289497345068e-05	-6.75119694694352e-05	0.000132521513489832	9.3814104545421e-05	6.15926254805017e-05	-2.69074413963624e-05	0.000214535650487204
3	PreTest, EntryTest, Antigen	20	0	0	0	0	1.41569910414793e-05	2.55121519936283e-05	-3.58468268660322e-05	6.41608089489909e-05	1.41569910414793e-05	2.55121519936283e-05	-3.58468268660322e-05	6.41608089489909e-05	4.73679460668838e-05	4.51683639968251e-05	-4.11620473668934e-05	0.000135897939500661
3	PreTest, EntryTest, Antigen	21	0	0	0	0	6.17965754635233e-06	1.27415703652333e-05	-1.8793820369505e-05	3.11531354622096e-05	6.17965754635233e-06	1.27415703652333e-05	-1.8793820369505e-05	3.11531354622096e-05	2.52876367873306e-05	3.29581056545075e-05	-3.9310250295504e-05	8.98855238701652e-05
4	PreTest, EntryTest, PCR 1D	0	1693.15541196812	35.8102481813402	1622.96732553269	1763.34349840355	3705.2222023342	59.6012522308888	3588.40374796166	3822.04065670674	5398.37761430232	76.9493022386515	5247.55698191456	5549.19824669008	0.255400928759074	0.0029821682583093	0.249555878972788	0.26124597854536
4	PreTest, EntryTest, PCR 1D	1	1618.68990843612	34.5201441663839	1551.03042587001	1686.34939100223	3702.45197571655	59.5846239999257	3585.6661126767	3819.23783875641	5321.14188415267	76.4127801532685	5171.37283505227	5470.91093325308	0.228007416622784	0.00285706807702591	0.222407563191813	0.233607270053754
4	PreTest, EntryTest, PCR 1D	2	1212.60620222012	28.5567168814485	1156.63503713248	1268.57736730776	3438.60845213713	56.2018533424056	3328.45281958602	3548.76408468825	4651.21465435725	70.8221969553963	4512.40314832468	4790.02616038983	0.193868555344741	0.00268135034699683	0.188613108664627	0.199124002024855
4	PreTest, EntryTest, PCR 1D	3	565.602256574737	18.6543149376088	529.039799297024	602.164713852451	2255.38135005272	43.3479260218871	2170.41941504982	2340.34328505562	2820.98360662745	53.5664378021074	2715.99338853532	2925.97382471958	0.140555191519005	0.00237505964208335	0.135900074620521	0.145210308417488
4	PreTest, EntryTest, PCR 1D	4	156.834638371583	9.13614693440332	138.927790380152	174.741486363013	963.258441419596	26.3434039144158	911.625369747341	1014.89151309185	1120.09307979118	31.4156858326463	1058.51833555919	1181.66782402317	0.100649055411216	0.00205044705403655	0.0966301791853044	0.104667931637128
4	PreTest, EntryTest, PCR 1D	5	33.3956337776519	4.17835585111928	25.2060563094581	41.5852112458457	318.988024832705	13.0960540020222	293.319758988741	344.656290676668	352.383658610356	15.227608897839	322.537545170592	382.229772050121	0.0868919662472581	0.00189861647370786	0.0831706779587907	0.0906132545357255
4	PreTest, EntryTest, PCR 1D	6	6.61791045713542	1.78124966354437	3.12666111658845	10.1091597976824	91.7600005884057	6.13383245511048	79.7376889763891	103.782312200422	98.3779110455411	7.04617340861938	84.5674111646471	112.188410926435	0.0835507988320709	0.00185643494423589	0.0799121863413686	0.0871894113227732
4	PreTest, EntryTest, PCR 1D	7	1.3061052133703	0.77100391729519	-0.20506246452827	2.81727289126887	24.3979658217118	2.75961514610546	18.9891201353451	29.8068115080785	25.7040710350821	3.15198059429201	19.5261890702697	31.8819529998944	0.0827706757052595	0.00185091894483098	0.0791428745733908	0.0863984768371282
4	PreTest, EntryTest, PCR 1D	8	0.274744988618594	0.358830072500728	-0.428561953482833	0.978051930720022	6.2847059160327	1.22568978181112	3.88235394368291	8.68705788838249	6.55945090465129	1.40699402102578	3.80174262344077	9.31715918586181	0.0818890636691099	0.00185176095894235	0.0782596121895828	0.0855185151486369
4	PreTest, EntryTest, PCR 1D	9	0.057946125297254	0.164315166265029	-0.264111600582204	0.380003851176712	1.62872240625524	0.573823565119624	0.504028218620781	2.75341659388971	1.6866685315525	0.659376830308117	0.394289944148589	2.97904711895641	0.077135873118857	0.00179391015981999	0.0736198092056098	0.0806519370321042
4	PreTest, EntryTest, PCR 1D	10	0.012752143913036	0.0766752859780136	-0.137531416603871	0.163035704429943	0.432778624796478	0.270701615669039	-0.0977965419148389	0.963353791507794	0.445530768709514	0.310980013692782	-0.163990058128339	1.05505159554737	0.0636870785388888	0.00162775965859606	0.0604966696080405	0.0668774874697371
4	PreTest, EntryTest, PCR 1D	11	0.00303753442052753	0.0352600893566315	-0.0660722407184701	0.0721473095595252	0.121258134152402	0.135312162771923	-0.143953704880567	0.386469973185371	0.12429566857293	0.153984101003627	-0.177513169394179	0.426104506540039	0.0434027139346514	0.00135852497045548	0.0407400049925586	0.0460654228767441
4	PreTest, EntryTest, PCR 1D	12	0.0007585574422447	0.0141816658106864	-0.0270375075467006	0.02855462243119	0.0371054549057021	0.0816286781658653	-0.122886754299394	0.197097664110798	0.0378640123479468	0.090964224695927	-0.14042586805607	0.216153892751964	0.0244613144524921	0.00102245859076498	0.0224572956145927	0.0264653332903914
4	PreTest, EntryTest, PCR 1D	13	0.000530108238405989	0.012213641903822	-0.0234086298930852	0.0244688463698972	0.0127009428941916	0.0504928932528947	-0.0862651278814821	0.111667013669865	0.0132310511325975	0.0583191901803049	-0.1010745616208	0.127536663885995	0.0118839478963985	0.000725960144557083	0.0104610660130667	0.0133068297797304
4	PreTest, EntryTest, PCR 1D	14	0	0	0	0	0.00420711278489442	0.0269424938615633	-0.0486001751837696	0.0570144007535585	0.00420711278489442	0.0269424938615633	-0.0486001751837696	0.0570144007535585	0.00528944177238746	0.000494778488839385	0.00431967593426227	0.00625920761051266
4	PreTest, EntryTest, PCR 1D	15	0	0	0	0	0.00140790985411349	0.00647459060669511	-0.0112822877350089	0.0140981074432359	0.00140790985411349	0.00647459060669511	-0.0112822877350089	0.0140981074432359	0.00227642066484045	0.000321764657593433	0.00164576193595732	0.00290707939372358
4	PreTest, EntryTest, PCR 1D	16	0	0	0	0	0.000491306420954966	0.000974349281584717	-0.00141841817095108	0.00240103101286101	0.000491306420954966	0.000974349281584717	-0.00141841817095108	0.00240103101286101	0.000989143035134436	0.000214585233553135	0.000568555977370292	0.00140973009289858
4	PreTest, EntryTest, PCR 1D	17	0	0	0	0	0.000191063590430301	0.000234847606304368	-0.000269237717926261	0.000651364898786863	0.000191063590430301	0.000234847606304368	-0.000269237717926261	0.000651364898786863	0.000434693015737884	0.000138674684211515	0.000162890634683315	0.000706495396792454
4	PreTest, EntryTest, PCR 1D	18	0	0	0	0	7.94544142033175e-05	0.000104887903712296	-0.000126125877072783	0.000285034705479418	7.94544142033175e-05	0.000104887903712296	-0.000126125877072783	0.000285034705479418	0.000201912627836735	9.19185392511278e-05	2.17522909045243e-05	0.000382072964768945
4	PreTest, EntryTest, PCR 1D	19	0	0	0	0	3.41562850096504e-05	5.20899236393035e-05	-6.79399653233845e-05	0.000136252535342685	3.41562850096504e-05	5.20899236393035e-05	-6.79399653233845e-05	0.000136252535342685	9.85613742643952e-05	6.42336770102409e-05	-2.73366326756769e-05	0.000224459381204467
4	PreTest, EntryTest, PCR 1D	20	0	0	0	0	1.49084897957711e-05	2.60124403214926e-05	-3.60758932343543e-05	6.58928728258965e-05	1.49084897957711e-05	2.60124403214926e-05	-3.60758932343543e-05	6.58928728258965e-05	4.99430062860863e-05	4.61329666686535e-05	-4.04776083844746e-05	0.000140363620956647
4	PreTest, EntryTest, PCR 1D	21	0	0	0	0	6.53068641439234e-06	1.29970047113265e-05	-1.89434428198076e-05	3.20048156485922e-05	6.53068641439234e-06	1.29970047113265e-05	-1.89434428198076e-05	3.20048156485922e-05	2.73287813910197e-05	3.43448771748343e-05	-3.99871778716555e-05	9.4644740653695e-05
5	PreTest, EntryTest, PCR 2D	0	1824.29982596261	37.0625609357456	1751.65720652855	1896.94244539667	4004.54079179012	60.1901461104936	3886.56810541355	4122.51347816668	5828.84061775273	78.5346750943313	5674.91265456784	5982.76858093762	0.254494298171581	0.00281976221413294	0.248967564231881	0.260021032111282
5	PreTest, EntryTest, PCR 2D	1	1735.4806305311	36.1092843659688	1664.7064331738	1806.2548278884	3995.34465154223	59.9722760544357	3877.79899047553	4112.89031260892	5730.82528207333	77.8473894823053	5578.24439868801	5883.40616545865	0.234345601126027	0.00275604103420424	0.228943760698987	0.239747441553068
5	PreTest, EntryTest, PCR 2D	2	1294.25314397125	29.6775985749272	1236.08505076439	1352.42123717811	3683.36280630176	57.1956426901857	3571.259346629	3795.46626597452	4977.61595027301	72.4565053820778	4835.60119972414	5119.63070082188	0.203297485748573	0.00262683119611217	0.198148896604193	0.208446074892952
5	PreTest, EntryTest, PCR 2D	3	604.423204957072	19.4864544089701	566.22975431549	642.616655598653	2411.01525842461	44.1554418822249	2324.47059233545	2497.55992451377	3015.43846338168	54.8982337180909	2907.83792529422	3123.03900146914	0.149448957147351	0.00236366136006587	0.144816180881622	0.15408173341308
5	PreTest, EntryTest, PCR 2D	4	167.91717846558	9.70726860230712	148.890932005058	186.943424926102	1029.84862782139	27.1951033164296	976.546225321187	1083.15103032159	1197.76580628697	32.6321248189247	1133.80684164188	1261.72477093206	0.108065902148931	0.0020844782067009	0.103980324863797	0.112151479434065
5	PreTest, EntryTest, PCR 2D	5	35.8533790403169	4.39845566035181	27.2324059460273	44.4743521346064	341.200353786268	13.4839251621847	314.771860468386	367.628847104149	377.053732826584	15.8445207647277	345.998472127718	408.108993525451	0.0937702403320336	0.00193041170134468	0.089986633397398	0.0975538472666691
5	PreTest, EntryTest, PCR 2D	6	7.08422500074617	1.85567182230937	3.44710822901979	10.7213417724725	98.1090253830609	6.25177688316368	85.8555426920601	110.362508074062	105.193250383807	7.20156264892605	91.078187591912	119.308313175702	0.090313283470396	0.00188790126529906	0.0866129969904098	0.0940135699503821
5	PreTest, EntryTest, PCR 2D	7	1.37061732900054	0.805509897233722	-0.208182069577559	2.94941672757863	26.0519177189541	2.88045503154784	20.4062258571204	31.6976095807879	27.4225350479547	3.29346410141015	20.9673454091908	33.8777246867186	0.0894781156211476	0.00188239361347636	0.0857886241387339	0.0931676071035612
5	PreTest, EntryTest, PCR 2D	8	0.290154929852177	0.361168195626455	-0.417734733575675	0.998044593280028	6.71562114921661	1.28764671508001	4.1918335876598	9.23940871077342	7.00577607906879	1.47210314107786	4.12045392255618	9.8910982355814	0.0883672556520127	0.00188405169746292	0.0846745143249853	0.09205999697904
5	PreTest, EntryTest, PCR 2D	9	0.0631723332400337	0.176201994256427	-0.282183575502563	0.40852824198263	1.74368238686142	0.59865491258005	0.570318758204521	2.91704601551832	1.80685472010145	0.690681975905719	0.453118047326245	3.16059139287666	0.0829370441808495	0.00182412043093295	0.079361768136221	0.0865123202254781
5	PreTest, EntryTest, PCR 2D	10	0.0129303564238979	0.0783838585336989	-0.140702006302152	0.166562719149948	0.461302355117638	0.283829256182853	-0.0950029870007543	1.01760769723603	0.474232711541536	0.327265700754987	-0.167208061938239	1.11567348502131	0.0682638134450663	0.00164706891847581	0.0650355583648537	0.0714920685252789
5	PreTest, EntryTest, PCR 2D	11	0.00322300619761356	0.0396173292762853	-0.0744269591839057	0.0808729715791328	0.128334050297786	0.140937344529259	-0.147903144979562	0.404571245575133	0.131557056495399	0.165141222608578	-0.192119739817413	0.455233852808212	0.0464012082916426	0.00139492152566289	0.0436671621013433	0.0491352544819418
5	PreTest, EntryTest, PCR 2D	12	0.000930202221028005	0.0172803785787862	-0.0329393397933929	0.0347997442354489	0.0388852066905127	0.0788969156736288	-0.1157527480298	0.193523161410825	0.0398154089115407	0.0898521102370452	-0.136294727153068	0.215925544976149	0.0261210560257592	0.00103558805437756	0.0240913034391792	0.0281508086123393
5	PreTest, EntryTest, PCR 2D	13	0.000331377260103127	0.0104790690671193	-0.0202075981114506	0.0208703526316569	0.0127402582319602	0.046601472642238	-0.0785986281468262	0.104079144610747	0.0130716354920633	0.0523364113428479	-0.0895077307399187	0.115651001724045	0.0127044725319462	0.000736778760347595	0.0112603861616649	0.0141485589022275
5	PreTest, EntryTest, PCR 2D	14	0	0	0	0	0.0044326095644132	0.0269480221124706	-0.0483855137760292	0.0572507329048556	0.0044326095644132	0.0269480221124706	-0.0483855137760292	0.0572507329048556	0.00564207198754295	0.000498964308752633	0.00466410194238779	0.00662004203269811
5	PreTest, EntryTest, PCR 2D	15	0	0	0	0	0.00148895896048861	0.00648072634785465	-0.0112132646813065	0.0141911826022837	0.00148895896048861	0.00648072634785465	-0.0112132646813065	0.0141911826022837	0.00243472662285409	0.000326836866690587	0.00179412636414054	0.00307532688156765
5	PreTest, EntryTest, PCR 2D	16	0	0	0	0	0.000521616196483131	0.00098427618071809	-0.00140756511772433	0.00245079751069059	0.000521616196483131	0.00098427618071809	-0.00140756511772433	0.00245079751069059	0.00105555322629913	0.000213489869346185	0.000637113082380609	0.00147399337021765
5	PreTest, EntryTest, PCR 2D	17	0	0	0	0	0.000202849263963396	0.000244111015209925	-0.000275608325848057	0.000681306853774849	0.000202849263963396	0.000244111015209925	-0.000275608325848057	0.000681306853774849	0.000460869838417509	0.000142173271751927	0.000182210225783731	0.000739529451051287
5	PreTest, EntryTest, PCR 2D	18	0	0	0	0	8.42934757839557e-05	0.000109733396666688	-0.000130783981682754	0.000299370933250665	8.42934757839557e-05	0.000109733396666688	-0.000130783981682754	0.000299370933250665	0.000214379575107333	9.49019845524609e-05	2.83716853845098e-05	0.000400387464830156
5	PreTest, EntryTest, PCR 2D	19	0	0	0	0	3.61824939973783e-05	5.45212603998489e-05	-7.06791763863254e-05	0.000143044164381082	3.61824939973783e-05	5.45212603998489e-05	-7.06791763863254e-05	0.000143044164381082	0.000104419698680779	6.54050338634093e-05	-2.37741676915028e-05	0.000232613565053062
5	PreTest, EntryTest, PCR 2D	20	0	0	0	0	1.57859313684656e-05	2.72941801266752e-05	-3.77106616798178e-05	6.92825244167489e-05	1.57859313684656e-05	2.72941801266752e-05	-3.77106616798178e-05	6.92825244167489e-05	5.33596324589081e-05	4.79709619225756e-05	-4.06634529093401e-05	0.000147382717827156
5	PreTest, EntryTest, PCR 2D	21	0	0	0	0	6.89409676690265e-06	1.36627734256672e-05	-1.9884939147405e-05	3.36731326812103e-05	6.89409676690265e-06	1.36627734256672e-05	-1.9884939147405e-05	3.36731326812103e-05	2.87045374932197e-05	3.54185715036611e-05	-4.07158626539561e-05	9.81249376403954e-05
6	PreTest, EntryTest, ExitTest, PCR 0D	0	1353.58639718656	31.9847651638848	1290.89625746535	1416.27653690778	2958.73014122984	51.8092978129488	2857.18391751646	3060.27636494322	4312.3165384164	68.2555473512118	4178.53566560802	4446.09741122477	0.234167301536621	0.00281513161637876	0.228649643568519	0.239684959504724
6	PreTest, EntryTest, ExitTest, PCR 0D	1	521.648136965361	20.5071749366972	481.454074089434	561.842199841287	1152.49890489816	33.4283347964704	1086.97936869708	1218.01844109925	1674.14704186352	44.3319238901896	1587.25647103875	1761.0376126883	0.0874709583620054	0.00191148416593308	0.0837244493967765	0.0912174673272342
6	PreTest, EntryTest, ExitTest, PCR 0D	2	106.116873253701	8.91133977636155	88.6506472920324	123.58309921537	249.128912377912	15.7606522404557	218.238033986619	280.019790769205	355.245785631613	20.3961964954273	315.269240500575	395.22233076265	0.0248149905349348	0.00104481671520912	0.0227671497731249	0.0268628312967446
6	PreTest, EntryTest, ExitTest, PCR 0D	3	17.057933149085	3.43721961849028	10.320982696844	23.7948836013259	49.5864247781222	6.77419847464935	36.3089957678094	62.8638537884349	66.6443579272071	8.43060307127542	50.1203759075073	83.168339946907	0.00717985673631991	0.000560891753518554	0.00608050889942354	0.00827920457321627
6	PreTest, EntryTest, ExitTest, PCR 0D	4	2.85762714456563	1.37627494990887	0.160128242744257	5.55512604638701	14.6852834533656	3.24255012104072	8.32988521612577	21.0406816906054	17.5429105979312	3.92912933811953	9.84181709521694	25.2440041006455	0.00329583157039147	0.000383628420763033	0.00254391986569592	0.00404774327508701
6	PreTest, EntryTest, ExitTest, PCR 0D	5	0.521395823294806	0.570923878740706	-0.597614979036978	1.64040662562659	5.65430005010791	1.5901322318653	2.53764087565193	8.77095922456389	6.17569587340272	1.87445170877738	2.50177052419906	9.84962122260637	0.00346222296762862	0.000395597885349071	0.00268685111234444	0.0042375948229128
6	PreTest, EntryTest, ExitTest, PCR 0D	6	0.0949029215509329	0.235105066040341	-0.365903007888135	0.55570885099	2.24723257319298	0.715388588969501	0.845070938812758	3.6493942075732	2.34213549474391	0.828482272081652	0.718310241463875	3.96596074802395	0.00596437288814874	0.000497510279849951	0.00498925273964283	0.00693949303665464
6	PreTest, EntryTest, ExitTest, PCR 0D	7	0.0159416756005424	0.0844195671616454	-0.149520676036283	0.181404027237367	0.909663489130785	0.339468574743541	0.244305082633446	1.57502189562813	0.925605164731328	0.379237917646253	0.182298846144672	1.66891148331798	0.0109035780175263	0.000716645205016864	0.00949895341569323	0.0123082026193593
6	PreTest, EntryTest, ExitTest, PCR 0D	8	0.00412419494683587	0.0461915590854296	-0.0864112608606061	0.0946596507542779	0.364571676498675	0.188572660909621	-0.00503073888418271	0.734174091881533	0.368695871445511	0.209356204978196	-0.0416422903117527	0.779034033202774	0.0182727811880792	0.000886350976262661	0.0165355332746044	0.0200100291015541
6	PreTest, EntryTest, ExitTest, PCR 0D	9	0	0	0	0	0.132595609475485	0.0643025434165568	0.00656262437903377	0.258628594571936	0.132595609475485	0.0643025434165568	0.00656262437903377	0.258628594571936	0.0255676304546042	0.00105638241806803	0.0234971209151908	0.0276381399940175
6	PreTest, EntryTest, ExitTest, PCR 0D	10	0	0	0	0	0.0534252174788396	0.0707943902246338	-0.0853317873614426	0.192182222319122	0.0534252174788396	0.0707943902246338	-0.0853317873614426	0.192182222319122	0.0273669573218768	0.0010729587131542	0.0252639582440946	0.0294699563996591
6	PreTest, EntryTest, ExitTest, PCR 0D	11	0	0	0	0	0.0186161954996079	0.00807748627795919	0.00278432239480788	0.0344480686044079	0.0186161954996079	0.00807748627795919	0.00278432239480788	0.0344480686044079	0.0217126927166391	0.000971005363625969	0.0198095222039322	0.023615863229346
6	PreTest, EntryTest, ExitTest, PCR 0D	12	0	0	0	0	0.00674706576737675	0.00288979758794466	0.00108306249500522	0.0124110690397483	0.00674706576737675	0.00288979758794466	0.00108306249500522	0.0124110690397483	0.0133265648056012	0.000789357107614458	0.0117794248746769	0.0148737047365255
6	PreTest, EntryTest, ExitTest, PCR 0D	13	0	0	0	0	0.00256103771050121	0.00130561304168417	2.03614880022992e-06	0.00512003927220219	0.00256103771050121	0.00130561304168417	2.03614880022992e-06	0.00512003927220219	0.00679715729232787	0.000561972455036095	0.00569569128045712	0.00789862330419862
6	PreTest, EntryTest, ExitTest, PCR 0D	14	0	0	0	0	0.000977883773571959	0.000618193838784705	-0.000233776150446064	0.00218954369758998	0.000977883773571959	0.000618193838784705	-0.000233776150446064	0.00218954369758998	0.00310377075877767	0.000362732619474492	0.00239281482460766	0.00381472669294767
6	PreTest, EntryTest, ExitTest, PCR 0D	15	0	0	0	0	0.000403356467316555	0.000365516463066667	-0.000313055800294112	0.00111976873492722	0.000403356467316555	0.000365516463066667	-0.000313055800294112	0.00111976873492722	0.00134881835241728	0.000244062625661731	0.000870455606120291	0.00182718109871428
6	PreTest, EntryTest, ExitTest, PCR 0D	16	0	0	0	0	0.000164486372239207	0.000192327135722434	-0.000212474813776764	0.000541447558255178	0.000164486372239207	0.000192327135722434	-0.000212474813776764	0.000541447558255178	0.000592059580693634	0.000166531481351948	0.000265657877243817	0.000918461284143452
6	PreTest, EntryTest, ExitTest, PCR 0D	17	0	0	0	0	6.96362549836374e-05	0.000100211298505715	-0.000126777890087565	0.00026605040005484	6.96362549836374e-05	0.000100211298505715	-0.000126777890087565	0.00026605040005484	0.000260472076132693	0.000110187273245714	4.4505020571093e-05	0.000476439131694293
6	PreTest, EntryTest, ExitTest, PCR 0D	18	0	0	0	0	3.12980690863023e-05	5.43856755412661e-05	-7.52978549745792e-05	0.000137893993147184	3.12980690863023e-05	5.43856755412661e-05	-7.52978549745792e-05	0.000137893993147184	0.000119667699361787	7.36299028198372e-05	-2.46469101650944e-05	0.000263982308888668
6	PreTest, EntryTest, ExitTest, PCR 0D	19	0	0	0	0	1.44664090433813e-05	2.87523756736848e-05	-4.18882472770409e-05	7.08210653638036e-05	1.44664090433813e-05	2.87523756736848e-05	-4.18882472770409e-05	7.08210653638036e-05	5.81520995259638e-05	4.80625449229565e-05	-3.60504885230309e-05	0.000152354687574958
6	PreTest, EntryTest, ExitTest, PCR 0D	20	0	0	0	0	6.73102334659936e-06	1.56666321537598e-05	-2.39755756747699e-05	3.74376223679686e-05	6.73102334659936e-06	1.56666321537598e-05	-2.39755756747699e-05	3.74376223679686e-05	2.93575327469378e-05	3.48174467825189e-05	-3.88846629467992e-05	9.75997284406748e-05
6	PreTest, EntryTest, ExitTest, PCR 0D	21	0	0	0	0	3.37942047959552e-06	9.00528086686346e-06	-1.42709300194569e-05	2.10297709786479e-05	3.37942047959552e-06	9.00528086686346e-06	-1.42709300194569e-05	2.10297709786479e-05	1.62829011497977e-05	2.71631270573226e-05	-3.69568278825547e-05	6.95226301821501e-05
7	PreTest, EntryTest, ExitTest, Antigen	0	1515.49903815126	34.0910587423324	1448.68056301629	1582.31751328623	3316.21576515955	55.2189156555176	3207.98669047474	3424.44483984437	4831.71480331082	71.5181421683963	4691.53924466076	4971.89036196087	0.271492357452099	0.00296036373608734	0.265690044529368	0.27729467037483
7	PreTest, EntryTest, ExitTest, Antigen	1	711.306130644579	22.9677534610832	666.289333860856	756.322927428302	1572.02210026902	39.152199766125	1495.28378872741	1648.76041181062	2283.3282309136	50.7515281758354	2183.85523568896	2382.80122613823	0.124451981954135	0.00221644796841359	0.120107743936045	0.128796219972226
7	PreTest, EntryTest, ExitTest, Antigen	2	149.296688701588	10.7174931352331	128.290402156532	170.302975246645	350.166259279738	18.9486429974031	313.026919004828	387.305599554648	499.462947981327	24.856244158463	450.744709430739	548.181186531914	0.0373649059257327	0.00124514144666687	0.0349244286902656	0.0398053831611998
7	PreTest, EntryTest, ExitTest, Antigen	3	21.7477495891545	3.95912429386857	13.9878659731721	29.5076332051369	61.6773545445823	7.67507500073074	46.6342075431501	76.7205015460146	83.4251041337368	9.57501610400787	64.6580725698814	102.192135697592	0.0106198407006595	0.00068735381940746	0.00927262721462084	0.0119670541866981
7	PreTest, EntryTest, ExitTest, Antigen	4	3.32053345167904	1.48917791549508	0.401744737308683	6.2393221660494	16.576762636522	3.4694035418734	9.77673169445008	23.3767935785938	19.897296088201	4.19987491023059	11.665541264149	28.1290509122529	0.00455731412848998	0.000452762991084712	0.00366989866596395	0.00544472959101602
7	PreTest, EntryTest, ExitTest, Antigen	5	0.585504485552201	0.601618955114546	-0.593668666472309	1.76467763757671	6.46661838999016	1.62718894016124	3.27732806727413	9.65590871270619	7.05212287554236	1.92017225111569	3.28858526335562	10.8156604877291	0.00477350938321203	0.000458572632661413	0.00387470702319566	0.0056723117432284
7	PreTest, EntryTest, ExitTest, Antigen	6	0.108089758033564	0.254489591251054	-0.390709840818503	0.60688935688563	2.73875156072751	0.741165517222901	1.28606714697062	4.1914359744844	2.84684131876107	0.861622462084682	1.1580612930751	4.53562134444705	0.00874747166841551	0.000621987771632085	0.00752837563601662	0.00996656770081439
7	PreTest, EntryTest, ExitTest, Antigen	7	0.017171397418315	0.0865404021280107	-0.152447790752586	0.186790585589216	1.17939204978528	0.348709140690416	0.495922134032062	1.86286196553849	1.19656344720359	0.388924386415189	0.434271649829822	1.95885524457736	0.0166637898920336	0.00089455036106595	0.0149104711843443	0.0184171085997229
7	PreTest, EntryTest, ExitTest, Antigen	8	0.00387672592220446	0.0437296509196375	-0.0818333898802851	0.089586841724694	0.493793248280158	0.19248874058331	0.116515316736869	0.871071179823446	0.497669974202362	0.20946188584276	0.0871246779505535	0.908215270454171	0.027730216932165	0.00112148880332795	0.0255320988776422	0.0299283349866878
7	PreTest, EntryTest, ExitTest, Antigen	9	0	0	0	0	0.187417486901626	0.0667846610812363	0.0565195511824024	0.318315422620849	0.187417486901626	0.0667846610812363	0.0565195511824024	0.318315422620849	0.0374298385180594	0.00127422684930048	0.0349323538934304	0.0399273231426883
7	PreTest, EntryTest, ExitTest, Antigen	10	0	0	0	0	0.0743682457986012	0.0587328294247189	-0.0407480998738478	0.18948459147105	0.0743682457986012	0.0587328294247189	-0.0407480998738478	0.18948459147105	0.0384915639997898	0.0012475740003018	0.0360463189591983	0.0409368090403814
7	PreTest, EntryTest, ExitTest, Antigen	11	0	0	0	0	0.0272791033415924	0.0112886852849174	0.00515328018315428	0.0494049265000305	0.0272791033415924	0.0112886852849174	0.00515328018315428	0.0494049265000305	0.0296547145308121	0.0011209268597943	0.0274576978856153	0.031851731176009
7	PreTest, EntryTest, ExitTest, Antigen	12	0	0	0	0	0.00985823313843953	0.0034613071901458	0.00307407104575375	0.0166423952311253	0.00985823313843953	0.0034613071901458	0.00307407104575375	0.0166423952311253	0.0178745984650523	0.000861170825815389	0.0161867036464541	0.0195624932836505
7	PreTest, EntryTest, ExitTest, Antigen	13	0	0	0	0	0.00371284316043727	0.00154484194295551	0.000684952952244475	0.00674073336863007	0.00371284316043727	0.00154484194295551	0.000684952952244475	0.00674073336863007	0.00900410460357207	0.000650626157331292	0.00772887733520274	0.0102793318719414
7	PreTest, EntryTest, ExitTest, Antigen	14	0	0	0	0	0.0013926035366864	0.000749805699052738	-7.70156334569696e-05	0.00286222270682976	0.0013926035366864	0.000749805699052738	-7.70156334569696e-05	0.00286222270682976	0.00407426155953918	0.000418441748346083	0.00325411573278086	0.0048944073862975
7	PreTest, EntryTest, ExitTest, Antigen	15	0	0	0	0	0.000575744943265985	0.000440538769611566	-0.000287711045172684	0.00143920093170465	0.000575744943265985	0.000440538769611566	-0.000287711045172684	0.00143920093170465	0.00177194048050091	0.0002785413419484	0.00122599945028204	0.00231788151071977
7	PreTest, EntryTest, ExitTest, Antigen	16	0	0	0	0	0.000239588618708479	0.000250940635053157	-0.000252255025995708	0.000731432263412666	0.000239588618708479	0.000250940635053157	-0.000252255025995708	0.000731432263412666	0.000774653659367281	0.000186713662102658	0.000408694881646071	0.00114061243708849
7	PreTest, EntryTest, ExitTest, Antigen	17	0	0	0	0	0.000100362338792114	0.000125916532024516	-0.000146434063975938	0.000347158741560166	0.000100362338792114	0.000125916532024516	-0.000146434063975938	0.000347158741560166	0.000340310409894109	0.000124275534851186	9.67303615857837e-05	0.000583890458202435
7	PreTest, EntryTest, ExitTest, Antigen	18	0	0	0	0	4.40357780786901e-05	7.04204728330087e-05	-9.3988348674007e-05	0.000182059904831387	4.40357780786901e-05	7.04204728330087e-05	-9.3988348674007e-05	0.000182059904831387	0.000156086519223488	8.28370552908448e-05	-6.27410914656799e-06	0.000318447147593544
7	PreTest, EntryTest, ExitTest, Antigen	19	0	0	0	0	2.1411942848648e-05	3.88326003740494e-05	-5.46999538844888e-05	9.75238395817849e-05	2.1411942848648e-05	3.88326003740494e-05	-5.46999538844888e-05	9.75238395817849e-05	7.65569974578708e-05	5.50289891011181e-05	-3.12998211803208e-05	0.000184413816096062
7	PreTest, EntryTest, ExitTest, Antigen	20	0	0	0	0	9.75595266445301e-06	1.99916789310621e-05	-2.94277380404288e-05	4.89396433693348e-05	9.75595266445301e-06	1.99916789310621e-05	-2.94277380404288e-05	4.89396433693348e-05	3.88092907847694e-05	4.04336281015196e-05	-4.04406202942091e-05	0.000118059201863748
7	PreTest, EntryTest, ExitTest, Antigen	21	0	0	0	0	4.60063449903043e-06	1.06749336209741e-05	-1.63222353980788e-05	2.55235043961396e-05	4.60063449903043e-06	1.06749336209741e-05	-1.63222353980788e-05	2.55235043961396e-05	2.09420292031022e-05	3.03532034261808e-05	-3.85502495122123e-05	8.04343079184166e-05
8	PreTest, EntryTest, ExitTest, PCR 1D	0	1693.15541196812	35.8102481813402	1622.96732553269	1763.34349840355	3705.2222023342	59.6012522308888	3588.40374796166	3822.04065670674	5398.37761430232	76.9493022386515	5247.55698191456	5549.19824669008	0.255400928759074	0.0029821682583093	0.249555878972788	0.26124597854536
8	PreTest, EntryTest, ExitTest, PCR 1D	1	1618.68990843612	34.5201441663839	1551.03042587001	1686.34939100223	3702.45197571655	59.5846239999257	3585.6661126767	3819.23783875641	5321.14188415267	76.4127801532685	5171.37283505227	5470.91093325308	0.228007416622784	0.00285706807702591	0.222407563191813	0.233607270053754
8	PreTest, EntryTest, ExitTest, PCR 1D	2	501.67867485372	19.5770385374122	463.307679320392	540.049670387048	1234.84824059308	34.2668421223558	1167.68523003326	1302.0112511529	1736.5269154468	44.7045417768115	1648.90601356425	1824.14781732935	0.0722216283411362	0.00175191644115001	0.0687878721164821	0.0756553845657902
8	PreTest, EntryTest, ExitTest, PCR 1D	3	86.7322347163731	7.44555781014895	72.1389414084811	101.325528024265	256.174197665734	15.96279294429	224.887123494925	287.461271836542	342.906432382107	20.0009062963093	303.70465604134	382.108208722873	0.015770764753729	0.000844321833268347	0.014115893960523	0.0174256355469349
8	PreTest, EntryTest, ExitTest, PCR 1D	4	11.5876790480878	2.63861538527906	6.41599289294084	16.7593652032348	41.9330842337516	6.10941588468239	29.9586290997741	53.9075393677291	53.5207632818394	7.42074326750639	38.9761064775269	68.0654200861519	0.00365575447573626	0.000388751118902909	0.00289380228268655	0.00441770666878596
8	PreTest, EntryTest, ExitTest, PCR 1D	5	1.56925846805068	0.962178243726276	-0.316610889652825	3.45512782575418	8.15467514926905	2.47730809694571	3.29915127925546	13.0101990192826	9.72393361731973	3.01321270919487	3.81803670729779	15.6298305273417	0.00257323224798389	0.000339028723285017	0.00190873595034526	0.00323772854562252
8	PreTest, EntryTest, ExitTest, PCR 1D	6	0.259488707073093	0.369126096202956	-0.463998441484701	0.982975855630888	2.13665417031603	1.01003774676592	0.156980186654834	4.11632815397723	2.39614287738912	1.20619578030335	0.0319991479945547	4.76028660678369	0.00429237618677157	0.000451706422644746	0.00340703159838787	0.00517772077515527
8	PreTest, EntryTest, ExitTest, PCR 1D	7	0.045971033731374	0.16729157399173	-0.281920451292416	0.373862518755164	0.656459678857336	0.415507100041527	-0.157934237224057	1.47085359493873	0.70243071258871	0.495912538672718	-0.269557863209817	1.67441928838724	0.00821760123859562	0.000588419964803507	0.00706429810758075	0.00937090436961049
8	PreTest, EntryTest, ExitTest, PCR 1D	8	0.00707756638628506	0.0566858390848085	-0.10402667821994	0.11818181099251	0.241957594613658	0.187798918722699	-0.126128286082831	0.610043475310148	0.249035160999943	0.219140943946828	-0.180481089135841	0.678551411135727	0.0146448005379126	0.000826472844993874	0.0130249137617246	0.0162646873141006
8	PreTest, EntryTest, ExitTest, PCR 1D	9	0.00182501583186011	0.0376322673798304	-0.0719342282326074	0.0755842598963276	0.0977799874161937	0.106524910399815	-0.111008836967444	0.306568811799832	0.0996050032480539	0.122487522326878	-0.140470540512627	0.339680547008734	0.0213108082783601	0.000999915871235769	0.019350973170738	0.0232706433859822
8	PreTest, EntryTest, ExitTest, PCR 1D	10	0	0	0	0	0.0355255214160384	0.0340263873176421	-0.0311661977265402	0.102217240558617	0.0355255214160384	0.0340263873176421	-0.0311661977265402	0.102217240558617	0.0232924298432342	0.00102190731381576	0.0212894915081553	0.0252953681783131
8	PreTest, EntryTest, ExitTest, PCR 1D	11	0	0	0	0	0.015553830547018	0.0478020479976324	-0.0781381835283414	0.109245844622378	0.015553830547018	0.0478020479976324	-0.0781381835283414	0.109245844622378	0.018858765786439	0.000882402958755319	0.0171292559872786	0.0205882755855994
8	PreTest, EntryTest, ExitTest, PCR 1D	12	0	0	0	0	0.00548105469403549	0.00283548066705558	-7.64874133934541e-05	0.0110385968014644	0.00548105469403549	0.00283548066705558	-7.64874133934541e-05	0.0110385968014644	0.0118044089962665	0.000725423492345572	0.0103825789512692	0.0132262390412638
8	PreTest, EntryTest, ExitTest, PCR 1D	13	0	0	0	0	0.00210265832275615	0.00128974877358868	-0.000425249273477664	0.00463056591898997	0.00210265832275615	0.00128974877358868	-0.000425249273477664	0.00463056591898997	0.0061421041589189	0.00053690284984701	0.00508977457321876	0.00719443374461904
8	PreTest, EntryTest, ExitTest, PCR 1D	14	0	0	0	0	0.00084450414230655	0.00055180632209725	-0.00023703624900406	0.00192604453361716	0.00084450414230655	0.00055180632209725	-0.00023703624900406	0.00192604453361716	0.00285428666125622	0.000365690068459064	0.00213753412707646	0.00357103919543599
8	PreTest, EntryTest, ExitTest, PCR 1D	15	0	0	0	0	0.000351666039627641	0.000316766686370527	-0.000269196665658592	0.000972528744913874	0.000351666039627641	0.000316766686370527	-0.000269196665658592	0.000972528744913874	0.00127682427189738	0.000236206971877793	0.000813858607016905	0.00173978993677785
8	PreTest, EntryTest, ExitTest, PCR 1D	16	0	0	0	0	0.000155700866704986	0.000184687138185912	-0.000206285924139402	0.000517687657549375	0.000155700866704986	0.000184687138185912	-0.000206285924139402	0.000517687657549375	0.000569496880919011	0.000161505209791623	0.00025294666972743	0.000886047092110591
8	PreTest, EntryTest, ExitTest, PCR 1D	17	0	0	0	0	6.62536815842815e-05	9.62873521732946e-05	-0.000122469528675376	0.000254976891843939	6.62536815842815e-05	9.62873521732946e-05	-0.000122469528675376	0.000254976891843939	0.00025643117429506	0.000109149521015986	4.24981131037273e-05	0.000470364235486392
8	PreTest, EntryTest, ExitTest, PCR 1D	18	0	0	0	0	2.97346772080897e-05	5.06137533621834e-05	-6.94682793817898e-05	0.000128937633797969	2.97346772080897e-05	5.06137533621834e-05	-6.94682793817898e-05	0.000128937633797969	0.000119139620546843	7.12157411368287e-05	-2.04432320813412e-05	0.000258722473175027
8	PreTest, EntryTest, ExitTest, PCR 1D	19	0	0	0	0	1.3728784300329e-05	2.72254941866267e-05	-3.96331843054593e-05	6.70907529061173e-05	1.3728784300329e-05	2.72254941866267e-05	-3.96331843054593e-05	6.70907529061173e-05	5.73078514117559e-05	5.10324673966219e-05	-4.2715784685623e-05	0.000157331487509135
8	PreTest, EntryTest, ExitTest, PCR 1D	20	0	0	0	0	6.97294140955863e-06	1.60904889850019e-05	-2.4564417001045e-05	3.85102998201623e-05	6.97294140955863e-06	1.60904889850019e-05	-2.4564417001045e-05	3.85102998201623e-05	3.03335987525564e-05	3.53423528426845e-05	-3.89374128191052e-05	9.9604610324218e-05
8	PreTest, EntryTest, ExitTest, PCR 1D	21	0	0	0	0	3.3285474043564e-06	8.53134882578378e-06	-1.33928962941798e-05	2.00499911028926e-05	3.3285474043564e-06	8.53134882578378e-06	-1.33928962941798e-05	2.00499911028926e-05	1.72540290000154e-05	2.69823422362285e-05	-3.56313617829923e-05	7.01394197830232e-05
9	PreTest, EntryTest, ExitTest, PCR 2D	0	1824.29982596261	37.0625609357456	1751.65720652855	1896.94244539667	4004.54079179012	60.1901461104936	3886.56810541355	4122.51347816668	5828.84061775273	78.5346750943313	5674.91265456784	5982.76858093762	0.254494298171581	0.00281976221413294	0.248967564231881	0.260021032111282
9	PreTest, EntryTest, ExitTest, PCR 2D	1	1735.4806305311	36.1092843659688	1664.7064331738	1806.2548278884	3995.34465154223	59.9722760544357	3877.79899047553	4112.89031260892	5730.82528207333	77.8473894823053	5578.24439868801	5883.40616545865	0.234345601126027	0.00275604103420424	0.228943760698987	0.239747441553068
9	PreTest, EntryTest, ExitTest, PCR 2D	2	1294.25314397125	29.6775985749272	1236.08505076439	1352.42123717811	3683.36280630176	57.1956426901857	3571.259346629	3795.46626597452	4977.61595027301	72.4565053820778	4835.60119972414	5119.63070082188	0.203297485748573	0.00262683119611217	0.198148896604193	0.208446074892952
9	PreTest, EntryTest, ExitTest, PCR 2D	3	323.000880005843	13.8915539108583	295.773434340561	350.228325671125	1105.4346613021	30.9378845025476	1044.7964076771	1166.07291492709	1428.43554130794	38.3624856969147	1353.24506934199	1503.62601327389	0.060252794657383	0.00153038829157793	0.0572532336058903	0.0632523557088758
9	PreTest, EntryTest, ExitTest, PCR 2D	4	43.8353571493553	5.06427201133955	33.9093840071297	53.7613302915808	180.736373380408	12.7517401056011	155.74296277343	205.729783987386	224.571730529763	15.6293890797351	193.938127933483	255.205333126044	0.0113339376130438	0.000712690855321151	0.00993706353661434	0.0127308116894733
9	PreTest, EntryTest, ExitTest, PCR 2D	5	5.13291371111724	1.73894370600549	1.72458404734648	8.54124337488799	24.3508125407866	4.41207751285503	15.7031406155907	32.9984844659825	29.4837262519039	5.36112892880946	18.9759135514373	39.9915389523704	0.00266236849501037	0.000339404716807757	0.00199713525006716	0.00332760173995357
9	PreTest, EntryTest, ExitTest, PCR 2D	6	0.648261997209586	0.604808192265099	-0.537162059630009	1.83368605404918	3.79837514951223	1.67852688005382	0.50846246460675	7.08828783441771	4.44663714672181	1.99897102228176	0.528653943049571	8.36462035039406	0.00252411381562401	0.00035220242733163	0.00183379705805401	0.003214430573194
9	PreTest, EntryTest, ExitTest, PCR 2D	7	0.0987254474882993	0.235386683277385	-0.362632451735375	0.560083346711974	0.787024277925301	0.686180381281665	-0.557889269386763	2.13193782523736	0.8857497254136	0.817930183482994	-0.717393434213067	2.48889288504027	0.00466659255823937	0.000455479563967547	0.00377385261286298	0.00555933250361576
9	PreTest, EntryTest, ExitTest, PCR 2D	8	0.0136312007165659	0.0797883151534362	-0.142753896984169	0.170016298417301	0.205315022650581	0.272829685908166	-0.329431161729424	0.740061207030585	0.218946223367147	0.314133592865239	-0.396755618648722	0.834648065383015	0.00868010022156593	0.000638335666206806	0.00742896231580059	0.00993123812733127
9	PreTest, EntryTest, ExitTest, PCR 2D	9	0.00144309623069093	0.0183618456269668	-0.034546121198164	0.0374323136595459	0.066374294311042	0.113364556487897	-0.155820236405236	0.28856882502732	0.0678173905417329	0.123691885625891	-0.174618705285014	0.31025348636848	0.0134490931234159	0.000778849427301116	0.0119225482459058	0.0149756380009261
9	PreTest, EntryTest, ExitTest, PCR 2D	10	0.00181427666497049	0.0343258039013727	-0.0654642989817199	0.0690928523116609	0.0265998896136815	0.0493171790037661	-0.0700617812337001	0.123261560461063	0.0284141662786519	0.0731694648716119	-0.114997984869707	0.171826317427011	0.0157349688392177	0.000829751319093731	0.014108656253794	0.0173612814246414
9	PreTest, EntryTest, ExitTest, PCR 2D	11	0.000256009193244399	0.00809572152594494	-0.0156116049976077	0.0161236233840965	0.0100239438436497	0.0205360249869632	-0.0302266651307981	0.0502745528180975	0.0102799530368941	0.0285054187169078	-0.0455906676482452	0.0661505737220335	0.013457262438354	0.000749736024349709	0.0119877798306286	0.0149267450460794
9	PreTest, EntryTest, ExitTest, PCR 2D	12	0	0	0	0	0.00414623935731826	0.00568017418092403	-0.00698690203729284	0.0152793807519294	0.00414623935731826	0.00568017418092403	-0.00698690203729284	0.0152793807519294	0.00885369954064631	0.000610565958041484	0.007656990262885	0.0100504088184076
9	PreTest, EntryTest, ExitTest, PCR 2D	13	0	0	0	0	0.00156402533406302	0.000932560139545854	-0.000263792539446855	0.00339184320757289	0.00156402533406302	0.000932560139545854	-0.000263792539446855	0.00339184320757289	0.00483016959864181	0.000447781127939626	0.00395251858788015	0.00570782060940348
9	PreTest, EntryTest, ExitTest, PCR 2D	14	0	0	0	0	0.000688187874485976	0.000593397912750897	-0.000474872034505782	0.00185124778347773	0.000688187874485976	0.000593397912750897	-0.000474872034505782	0.00185124778347773	0.00233210968462489	0.000324298840697533	0.00169648395685773	0.00296773541239206
9	PreTest, EntryTest, ExitTest, PCR 2D	15	0	0	0	0	0.000277512295899969	0.000273209624404063	-0.000257978567931994	0.000813003159731932	0.000277512295899969	0.000273209624404063	-0.000257978567931994	0.000813003159731932	0.0010772441419557	0.000220008268437985	0.000646027935817254	0.00150846034809416
9	PreTest, EntryTest, ExitTest, PCR 2D	16	0	0	0	0	0.000130228986332138	0.000186407887897006	-0.000235130473945994	0.000495588446610271	0.000130228986332138	0.000186407887897006	-0.000235130473945994	0.000495588446610271	0.00048839873598633	0.000147771938434052	0.000198765736655588	0.000778031735317071
9	PreTest, EntryTest, ExitTest, PCR 2D	17	0	0	0	0	5.24252593644575e-05	8.24825279586583e-05	-0.000109240495434513	0.000214091014163428	5.24252593644575e-05	8.24825279586583e-05	-0.000109240495434513	0.000214091014163428	0.000223383898033384	9.89354077678655e-05	2.94704988083674e-05	0.0004172972972584
9	PreTest, EntryTest, ExitTest, PCR 2D	18	0	0	0	0	2.81672992381069e-05	5.26841397751026e-05	-7.50936147210942e-05	0.000131428213197308	2.81672992381069e-05	5.26841397751026e-05	-7.50936147210942e-05	0.000131428213197308	0.000107474928029928	6.93498177197452e-05	-2.8450714700773e-05	0.000243400570760628
9	PreTest, EntryTest, ExitTest, PCR 2D	19	0	0	0	0	1.41335328559063e-05	3.1221423803493e-05	-4.706045779894e-05	7.53275235107527e-05	1.41335328559063e-05	3.1221423803493e-05	-4.706045779894e-05	7.53275235107527e-05	5.49913165216049e-05	4.77857072876924e-05	-3.86686697622722e-05	0.000148651302805482
9	PreTest, EntryTest, ExitTest, PCR 2D	20	0	0	0	0	6.76462470550973e-06	1.72231894483305e-05	-2.6992826613218e-05	4.05220760242375e-05	6.76462470550973e-06	1.72231894483305e-05	-2.6992826613218e-05	4.05220760242375e-05	2.87909574671263e-05	3.6129729914273e-05	-4.20233131648487e-05	9.96052280991013e-05
9	PreTest, EntryTest, ExitTest, PCR 2D	21	0	0	0	0	3.2125743811759e-06	8.18998990058181e-06	-1.28398058239645e-05	1.92649545863163e-05	3.2125743811759e-06	8.18998990058181e-06	-1.28398058239645e-05	1.92649545863163e-05	1.67660571444558e-05	2.61437357199921e-05	-3.44756648667288e-05	6.80077791556404e-05
10	PreTest, EntryTest, ExitTest, DailyTest, PCR 0D	0	1353.58639718656	31.9847651638848	1290.89625746535	1416.27653690778	2958.73014122984	51.8092978129488	2857.18391751646	3060.27636494322	4312.3165384164	68.2555473512118	4178.53566560802	4446.09741122477	0.234167301536621	0.00281513161637876	0.228649643568519	0.239684959504724
10	PreTest, EntryTest, ExitTest, DailyTest, PCR 0D	1	276.946700374448	15.1706684150915	247.212190280868	306.681210468027	614.763921520785	24.6761132943791	566.398739463802	663.129103577768	891.710621895233	32.807509654031	827.407902973332	956.013340817133	0.0494811421023137	0.0014637872229832	0.0466121191452667	0.0523501650593608
10	PreTest, EntryTest, ExitTest, DailyTest, PCR 0D	2	13.7696455116731	3.13650667118989	7.62209243614087	19.9171985872053	33.1234900179296	5.69979823116252	21.9518854848511	44.2950945510081	46.8931355296027	7.35408007816738	32.4791385763946	61.3071324828108	0.00575742287200612	0.00048369969918895	0.00480937146159578	0.00670547428241647
10	PreTest, EntryTest, ExitTest, DailyTest, PCR 0D	3	0.344600970342123	0.486063831286093	-0.60808413897862	1.29728607966287	1.00759583567972	0.999638261797424	-0.951695157443233	2.96688682880267	1.35219680602184	1.23683652772014	-1.07200278830963	3.77639640035331	0.000721123410162281	0.000172644910397769	0.000382739385782655	0.00105950743454191
10	PreTest, EntryTest, ExitTest, DailyTest, PCR 0D	4	0.00612872141015506	0.0561297933535732	-0.103885673562848	0.116143116383159	0.0256557468840299	0.174880924246788	-0.317110864639675	0.368422358407735	0.031784468294185	0.20396738978842	-0.367991615691119	0.431560552279489	7.94218073602802e-05	5.84363306697142e-05	-3.51134007523596e-05	0.00019395701547292
10	PreTest, EntryTest, ExitTest, DailyTest, PCR 0D	5	0	0	0	0	0.00105514678425102	0.0333489367106458	-0.0643087691686148	0.0664190627371169	0.00105514678425102	0.0333489367106458	-0.0643087691686148	0.0664190627371169	7.26927246036114e-06	1.76853299541152e-05	-2.73939742497046e-05	4.19325191704269e-05
10	PreTest, EntryTest, ExitTest, DailyTest, PCR 0D	6	0	0	0	0	4.38080144874754e-08	3.99114491556982e-07	-7.38456388964209e-07	8.2607241793916e-07	4.38080144874754e-08	3.99114491556982e-07	-7.38456388964209e-07	8.2607241793916e-07	5.75626921583539e-07	5.01825610240365e-06	-9.26015503912761e-06	1.04114088822947e-05
10	PreTest, EntryTest, ExitTest, DailyTest, PCR 0D	7	0	0	0	0	2.84942948222525e-09	9.01068719586607e-08	-1.7376003955675e-07	1.794588985212e-07	2.84942948222525e-09	9.01068719586607e-08	-1.7376003955675e-07	1.794588985212e-07	4.41676604390266e-08	1.39670405908236e-06	-2.69337229536241e-06	2.78170761624046e-06
10	PreTest, EntryTest, ExitTest, DailyTest, PCR 0D	8	0	0	0	0	0	0	0	0	0	0	0	0	0	0	0	0
10	PreTest, EntryTest, ExitTest, DailyTest, PCR 0D	9	0	0	0	0	0	0	0	0	0	0	0	0	0	0	0	0
10	PreTest, EntryTest, ExitTest, DailyTest, PCR 0D	10	0	0	0	0	0	0	0	0	0	0	0	0	0	0	0	0
10	PreTest, EntryTest, ExitTest, DailyTest, PCR 0D	11	0	0	0	0	0	0	0	0	0	0	0	0	0	0	0	0
10	PreTest, EntryTest, ExitTest, DailyTest, PCR 0D	12	0	0	0	0	0	0	0	0	0	0	0	0	0	0	0	0
10	PreTest, EntryTest, ExitTest, DailyTest, PCR 0D	13	0	0	0	0	0	0	0	0	0	0	0	0	0	0	0	0
10	PreTest, EntryTest, ExitTest, DailyTest, PCR 0D	14	0	0	0	0	0	0	0	0	0	0	0	0	0	0	0	0
10	PreTest, EntryTest, ExitTest, DailyTest, PCR 0D	15	0	0	0	0	0	0	0	0	0	0	0	0	0	0	0	0
10	PreTest, EntryTest, ExitTest, DailyTest, PCR 0D	16	0	0	0	0	0	0	0	0	0	0	0	0	0	0	0	0
10	PreTest, EntryTest, ExitTest, DailyTest, PCR 0D	17	0	0	0	0	0	0	0	0	0	0	0	0	0	0	0	0
10	PreTest, EntryTest, ExitTest, DailyTest, PCR 0D	18	0	0	0	0	0	0	0	0	0	0	0	0	0	0	0	0
10	PreTest, EntryTest, ExitTest, DailyTest, PCR 0D	19	0	0	0	0	0	0	0	0	0	0	0	0	0	0	0	0
10	PreTest, EntryTest, ExitTest, DailyTest, PCR 0D	20	0	0	0	0	0	0	0	0	0	0	0	0	0	0	0	0
10	PreTest, EntryTest, ExitTest, DailyTest, PCR 0D	21	0	0	0	0	0	0	0	0	0	0	0	0	0	0	0	0
11	PreTest, EntryTest, ExitTest, DailyTest, Antigen	0	1515.49903815126	34.0910587423324	1448.68056301629	1582.31751328623	3316.21576515955	55.2189156555176	3207.98669047474	3424.44483984437	4831.71480331082	71.5181421683963	4691.53924466076	4971.89036196087	0.271492357452099	0.00296036373608734	0.265690044529368	0.27729467037483
11	PreTest, EntryTest, ExitTest, DailyTest, Antigen	1	456.020099155638	18.3160422970694	420.120656253382	491.919542057894	1010.55252508649	31.9512247840311	947.928124509788	1073.17692566319	1466.57262424213	41.2433376461147	1385.73568245574	1547.40956602851	0.0850754233886123	0.00190920469612121	0.0813333821842148	0.0888174645930099
11	PreTest, EntryTest, ExitTest, DailyTest, Antigen	2	32.2427613278892	5.03637313197926	22.3714699892098	42.1140526665685	76.890723776101	8.81132159913373	59.6205334417989	94.1609141104032	109.13348510399	11.5071271132593	86.5795159620019	131.687454245979	0.0138976569426823	0.000786172088128813	0.0123567596499498	0.0154385542354148
11	PreTest, EntryTest, ExitTest, DailyTest, Antigen	3	1.06374680206767	0.842294693638102	-0.587150797463013	2.71464440159835	2.90267404072627	1.6664951002592	-0.363656355781754	6.1690044372343	3.96642084279394	2.06087599202113	-0.0728961015674701	8.00573778715535	0.00230559804527249	0.000317923466850111	0.00168246805024627	0.00292872804029871
11	PreTest, EntryTest, ExitTest, DailyTest, Antigen	4	0.0336949158200892	0.13923087723414	-0.239197603558826	0.306587435199004	0.125358928470219	0.358027790594629	-0.576375541095254	0.827093398035692	0.159053844290309	0.430152575589377	-0.684045203864871	1.00215289244549	0.000342317178373989	0.000124443699435351	9.84075274807021e-05	0.000586226829267276
11	PreTest, EntryTest, ExitTest, DailyTest, Antigen	5	0.000207306586660097	0.00655560987800985	-0.0126416887742392	0.0130563019475594	0.00412752472453071	0.0772094508895282	-0.147202999018945	0.155458048468006	0.00433483131119081	0.0800429626768151	-0.152549375535367	0.161219038157748	4.21333694244388e-05	4.29893408241435e-05	-4.21257385908824e-05	0.00012639247743976
11	PreTest, EntryTest, ExitTest, DailyTest, Antigen	6	0	0	0	0	4.86002825606621e-07	1.97246123967443e-06	-3.38002120415526e-06	4.3520268553685e-06	4.86002825606621e-07	1.97246123967443e-06	-3.38002120415526e-06	4.3520268553685e-06	5.5422294882361e-06	1.53262757525966e-05	-2.44972709868532e-05	3.55817299633254e-05
11	PreTest, EntryTest, ExitTest, DailyTest, Antigen	7	0	0	0	0	6.01499487411794e-08	7.07805350714209e-07	-1.32714853865867e-06	1.44744843614103e-06	6.01499487411794e-08	7.07805350714209e-07	-1.32714853865867e-06	1.44744843614103e-06	5.32749491508539e-07	4.836548537118e-06	-8.94688564124274e-06	1.00123846242598e-05
11	PreTest, EntryTest, ExitTest, DailyTest, Antigen	8	0	0	0	0	1.5050960737229e-08	2.82179988272559e-07	-5.38021816276987e-07	5.68123737751445e-07	1.5050960737229e-08	2.82179988272559e-07	-5.38021816276987e-07	5.68123737751445e-07	1.33260500919318e-07	2.43059407799149e-06	-4.63070389194399e-06	4.89722489378263e-06
11	PreTest, EntryTest, ExitTest, DailyTest, Antigen	9	0	0	0	0	5.38056734980148e-09	1.20299826214162e-07	-2.30407092029956e-07	2.41168226729559e-07	5.38056734980148e-09	1.20299826214162e-07	-2.30407092029956e-07	2.41168226729559e-07	8.85697608406618e-08	1.97950744982967e-06	-3.7912648408255e-06	3.96840436250682e-06
11	PreTest, EntryTest, ExitTest, DailyTest, Antigen	10	0	0	0	0	0	0	0	0	0	0	0	0	0	0	0	0
11	PreTest, EntryTest, ExitTest, DailyTest, Antigen	11	0	0	0	0	0	0	0	0	0	0	0	0	0	0	0	0
11	PreTest, EntryTest, ExitTest, DailyTest, Antigen	12	0	0	0	0	0	0	0	0	0	0	0	0	0	0	0	0
11	PreTest, EntryTest, ExitTest, DailyTest, Antigen	13	0	0	0	0	0	0	0	0	0	0	0	0	0	0	0	0
11	PreTest, EntryTest, ExitTest, DailyTest, Antigen	14	0	0	0	0	0	0	0	0	0	0	0	0	0	0	0	0
11	PreTest, EntryTest, ExitTest, DailyTest, Antigen	15	0	0	0	0	0	0	0	0	0	0	0	0	0	0	0	0
11	PreTest, EntryTest, ExitTest, DailyTest, Antigen	16	0	0	0	0	0	0	0	0	0	0	0	0	0	0	0	0
11	PreTest, EntryTest, ExitTest, DailyTest, Antigen	17	0	0	0	0	0	0	0	0	0	0	0	0	0	0	0	0
11	PreTest, EntryTest, ExitTest, DailyTest, Antigen	18	0	0	0	0	0	0	0	0	0	0	0	0	0	0	0	0
11	PreTest, EntryTest, ExitTest, DailyTest, Antigen	19	0	0	0	0	0	0	0	0	0	0	0	0	0	0	0	0
11	PreTest, EntryTest, ExitTest, DailyTest, Antigen	20	0	0	0	0	0	0	0	0	0	0	0	0	0	0	0	0
11	PreTest, EntryTest, ExitTest, DailyTest, Antigen	21	0	0	0	0	0	0	0	0	0	0	0	0	0	0	0	0
12	PreTest, EntryTest, ExitTest, DailyTest, PCR 1D	0	1693.15541196812	35.8102481813402	1622.96732553269	1763.34349840355	3705.2222023342	59.6012522308888	3588.40374796166	3822.04065670674	5398.37761430232	76.9493022386515	5247.55698191456	5549.19824669008	0.255400928759074	0.0029821682583093	0.249555878972788	0.26124597854536
12	PreTest, EntryTest, ExitTest, DailyTest, PCR 1D	1	1618.68990843612	34.5201441663839	1551.03042587001	1686.34939100223	3702.45197571655	59.5846239999257	3585.6661126767	3819.23783875641	5321.14188415267	76.4127801532685	5171.37283505227	5470.91093325308	0.228007416622784	0.00285706807702591	0.222407563191813	0.233607270053754
12	PreTest, EntryTest, ExitTest, DailyTest, PCR 1D	2	270.627687272163	14.6597556419672	241.894566213907	299.360808330419	636.288686658479	24.2893232543083	588.681613080035	683.895760236924	906.916373930642	32.0231135216092	844.151071428288	969.681676432996	0.0378195966974986	0.00123838364962702	0.0353923647442296	0.0402468286507675
12	PreTest, EntryTest, ExitTest, DailyTest, PCR 1D	3	12.8430007027939	2.95064316185207	7.05974010556386	18.626261300024	33.9024622582586	5.6380017455251	22.8519788370294	44.9529456794878	46.7454629610525	7.17725217393616	32.6780487001377	60.8128772219674	0.00231286478023352	0.000316971664548317	0.00169160031771882	0.00293412924274823
12	PreTest, EntryTest, ExitTest, DailyTest, PCR 1D	4	0.316296869519564	0.469077712299426	-0.603095446587311	1.23568918562644	0.987274717489402	0.958730179744363	-0.89183643480955	2.86638586978835	1.30357158700897	1.20523054647445	-1.05868028408095	3.66582345809888	0.000108369573375105	6.85675755048226e-05	-2.60228746143476e-05	0.000242762021364557
12	PreTest, EntryTest, ExitTest, DailyTest, PCR 1D	5	0.0081424480766871	0.0669859431784117	-0.123150000553	0.139434896706374	0.0235133078191763	0.150393405428335	-0.27125776682036	0.318284382458712	0.0316557558958634	0.19440175085808	-0.349371675785974	0.412683187577701	7.23495061154731e-06	1.71087289546805e-05	-2.62981581396265e-05	4.07680593627212e-05
12	PreTest, EntryTest, ExitTest, DailyTest, PCR 1D	6	0	0	0	0	4.47565214350277e-08	5.19003344856974e-07	-9.72490034484642e-07	1.0620030773547e-06	4.47565214350277e-08	5.19003344856974e-07	-9.72490034484642e-07	1.0620030773547e-06	4.44742893963521e-07	4.42746952835292e-06	-8.23309738160821e-06	9.12258316953525e-06
12	PreTest, EntryTest, ExitTest, DailyTest, PCR 1D	7	0	0	0	0	5.00521878841863e-09	1.58278915588713e-07	-3.05221455765459e-07	3.15231893342296e-07	5.00521878841863e-09	1.58278915588713e-07	-3.05221455765459e-07	3.15231893342296e-07	4.49216117874309e-08	1.42054609414149e-06	-2.7393487327299e-06	2.82919195630476e-06
12	PreTest, EntryTest, ExitTest, DailyTest, PCR 1D	8	0	0	0	0	0	0	0	0	0	0	0	0	0	0	0	0
12	PreTest, EntryTest, ExitTest, DailyTest, PCR 1D	9	0	0	0	0	0	0	0	0	0	0	0	0	0	0	0	0
12	PreTest, EntryTest, ExitTest, DailyTest, PCR 1D	10	0	0	0	0	0	0	0	0	0	0	0	0	0	0	0	0
12	PreTest, EntryTest, ExitTest, DailyTest, PCR 1D	11	0	0	0	0	0	0	0	0	0	0	0	0	0	0	0	0
12	PreTest, EntryTest, ExitTest, DailyTest, PCR 1D	12	0	0	0	0	0	0	0	0	0	0	0	0	0	0	0	0
12	PreTest, EntryTest, ExitTest, DailyTest, PCR 1D	13	0	0	0	0	0	0	0	0	0	0	0	0	0	0	0	0
12	PreTest, EntryTest, ExitTest, DailyTest, PCR 1D	14	0	0	0	0	0	0	0	0	0	0	0	0	0	0	0	0
12	PreTest, EntryTest, ExitTest, DailyTest, PCR 1D	15	0	0	0	0	0	0	0	0	0	0	0	0	0	0	0	0
12	PreTest, EntryTest, ExitTest, DailyTest, PCR 1D	16	0	0	0	0	0	0	0	0	0	0	0	0	0	0	0	0
12	PreTest, EntryTest, ExitTest, DailyTest, PCR 1D	17	0	0	0	0	0	0	0	0	0	0	0	0	0	0	0	0
12	PreTest, EntryTest, ExitTest, DailyTest, PCR 1D	18	0	0	0	0	0	0	0	0	0	0	0	0	0	0	0	0
12	PreTest, EntryTest, ExitTest, DailyTest, PCR 1D	19	0	0	0	0	0	0	0	0	0	0	0	0	0	0	0	0
12	PreTest, EntryTest, ExitTest, DailyTest, PCR 1D	20	0	0	0	0	0	0	0	0	0	0	0	0	0	0	0	0
12	PreTest, EntryTest, ExitTest, DailyTest, PCR 1D	21	0	0	0	0	0	0	0	0	0	0	0	0	0	0	0	0
13	PreTest, EntryTest, ExitTest, DailyTest, PCR 2D	0	1824.29982596261	37.0625609357456	1751.65720652855	1896.94244539667	4004.54079179012	60.1901461104936	3886.56810541355	4122.51347816668	5828.84061775273	78.5346750943313	5674.91265456784	5982.76858093762	0.254494298171581	0.00281976221413294	0.248967564231881	0.260021032111282
13	PreTest, EntryTest, ExitTest, DailyTest, PCR 2D	1	1735.4806305311	36.1092843659688	1664.7064331738	1806.2548278884	3995.34465154223	59.9722760544357	3877.79899047553	4112.89031260892	5730.82528207333	77.8473894823053	5578.24439868801	5883.40616545865	0.234345601126027	0.00275604103420424	0.228943760698987	0.239747441553068
13	PreTest, EntryTest, ExitTest, DailyTest, PCR 2D	2	1294.25314397125	29.6775985749272	1236.08505076439	1352.42123717811	3683.36280630176	57.1956426901857	3571.259346629	3795.46626597452	4977.61595027301	72.4565053820778	4835.60119972414	5119.63070082188	0.203297485748573	0.00262683119611217	0.198148896604193	0.208446074892952
13	PreTest, EntryTest, ExitTest, DailyTest, PCR 2D	3	192.273640872542	10.7816104019082	171.141684484802	213.405597260282	621.072398785582	24.5495682328551	572.955245049186	669.189552521978	813.346039658124	30.2632823528466	754.030006246545	872.662073069704	0.0330019819418244	0.00119155196115594	0.0306665400979588	0.0353374237856901
13	PreTest, EntryTest, ExitTest, DailyTest, PCR 2D	4	8.90287667132935	2.38568166397215	4.22694060994395	13.5788127327148	31.2043829641889	5.41376101975514	20.5934113654688	41.8153545629089	40.1072596355182	6.75859739334452	26.860408744563	53.3541105264735	0.0017382851622324	0.000282962812871708	0.00118367804900385	0.00229289227546094
13	PreTest, EntryTest, ExitTest, DailyTest, PCR 2D	5	0.243146365085231	0.39253736301239	-0.526226866419054	1.01251959658951	0.886762212791624	0.931468099403991	-0.938915262040199	2.71243968762345	1.12990857787685	1.1251963621418	-1.07547629192106	3.33529344767477	5.26000760216647e-05	4.95738219897841e-05	-4.45646150783121e-05	0.000149764767121641
13	PreTest, EntryTest, ExitTest, DailyTest, PCR 2D	6	0.00781356167424494	0.0668996143702872	-0.123309682491518	0.138936805840008	0.0245585031048249	0.148684679552259	-0.266863468817602	0.315980475027252	0.0323720647790698	0.194244166460903	-0.3483465014843	0.41309063104244	1.86382140066699e-06	9.33816531837109e-06	-1.64389826233403e-05	2.01666254246743e-05
13	PreTest, EntryTest, ExitTest, DailyTest, PCR 2D	7	0	0	0	0	9.77116448853723e-09	1.79621746321097e-07	-3.42287458300814e-07	3.61829787277888e-07	9.77116448853723e-09	1.79621746321097e-07	-3.42287458300814e-07	3.61829787277888e-07	1.32737608062127e-07	2.42102007010006e-06	-4.61246172933399e-06	4.87793694545824e-06
13	PreTest, EntryTest, ExitTest, DailyTest, PCR 2D	8	0	0	0	0	0	0	0	0	0	0	0	0	0	0	0	0
13	PreTest, EntryTest, ExitTest, DailyTest, PCR 2D	9	0	0	0	0	0	0	0	0	0	0	0	0	0	0	0	0
13	PreTest, EntryTest, ExitTest, DailyTest, PCR 2D	10	0	0	0	0	0	0	0	0	0	0	0	0	0	0	0	0
13	PreTest, EntryTest, ExitTest, DailyTest, PCR 2D	11	0	0	0	0	0	0	0	0	0	0	0	0	0	0	0	0
13	PreTest, EntryTest, ExitTest, DailyTest, PCR 2D	12	0	0	0	0	0	0	0	0	0	0	0	0	0	0	0	0
13	PreTest, EntryTest, ExitTest, DailyTest, PCR 2D	13	0	0	0	0	0	0	0	0	0	0	0	0	0	0	0	0
13	PreTest, EntryTest, ExitTest, DailyTest, PCR 2D	14	0	0	0	0	0	0	0	0	0	0	0	0	0	0	0	0
13	PreTest, EntryTest, ExitTest, DailyTest, PCR 2D	15	0	0	0	0	0	0	0	0	0	0	0	0	0	0	0	0
13	PreTest, EntryTest, ExitTest, DailyTest, PCR 2D	16	0	0	0	0	0	0	0	0	0	0	0	0	0	0	0	0
13	PreTest, EntryTest, ExitTest, DailyTest, PCR 2D	17	0	0	0	0	0	0	0	0	0	0	0	0	0	0	0	0
13	PreTest, EntryTest, ExitTest, DailyTest, PCR 2D	18	0	0	0	0	0	0	0	0	0	0	0	0	0	0	0	0
13	PreTest, EntryTest, ExitTest, DailyTest, PCR 2D	19	0	0	0	0	0	0	0	0	0	0	0	0	0	0	0	0
13	PreTest, EntryTest, ExitTest, DailyTest, PCR 2D	20	0	0	0	0	0	0	0	0	0	0	0	0	0	0	0	0
13	PreTest, EntryTest, ExitTest, DailyTest, PCR 2D	21	0	0	0	0	0	0	0	0	0	0	0	0	0	0	0	0
14	PreTest, EntryTest, ExitTest, TestEvery2Days, PCR 0D	0	1353.58639718656	31.9847651638848	1290.89625746535	1416.27653690778	2958.73014122984	51.8092978129488	2857.18391751646	3060.27636494322	4312.3165384164	68.2555473512118	4178.53566560802	4446.09741122477	0.234167301536621	0.00281513161637876	0.228649643568519	0.239684959504724
14	PreTest, EntryTest, ExitTest, TestEvery2Days, PCR 0D	1	276.946700374448	15.1706684150915	247.212190280868	306.681210468027	614.763921520785	24.6761132943791	566.398739463802	663.129103577768	891.710621895233	32.807509654031	827.407902973332	956.013340817133	0.0494811421023137	0.0014637872229832	0.0466121191452667	0.0523501650593608
14	PreTest, EntryTest, ExitTest, TestEvery2Days, PCR 0D	2	64.1605288065323	7.11210051714588	50.2208117929264	78.1002458201382	149.282949316643	12.1334953101538	125.501298508742	173.064600124545	213.443478123175	15.9219430492676	182.236469746611	244.65048649974	0.0139796504442389	0.000766619346438162	0.0124770765252201	0.0154822243632577
14	PreTest, EntryTest, ExitTest, TestEvery2Days, PCR 0D	3	0.949059102144819	0.809552106718248	-0.637663027022948	2.53578123131258	2.56121711631285	1.58909423699027	-0.553407588188072	5.67584182081378	3.51027621845767	2.02521561100659	-0.459146379115254	7.4796988160306	0.00129339501317061	0.000230545287023464	0.000841526250604619	0.0017452637757366
14	PreTest, EntryTest, ExitTest, TestEvery2Days, PCR 0D	4	0.263057370242643	0.431216980930161	-0.582127912380473	1.10824265286576	0.801563798103231	0.867510400942424	-0.898756587743921	2.50188418395038	1.06462116834587	1.09351527556429	-1.07866877176014	3.20791110845189	0.000285971292516606	0.000112038969753128	6.63749118004746e-05	0.000505567673232738
14	PreTest, EntryTest, ExitTest, TestEvery2Days, PCR 0D	5	0.00318242708715759	0.0521010314972033	-0.0989355946473609	0.105300448821676	0.0062543161217414	0.0768244149889142	-0.14432153725653	0.156830169500013	0.00943674320889899	0.102684972904837	-0.191825803684582	0.21069929010238	3.32183570208856e-05	3.87337841242283e-05	-4.26998598626018e-05	0.000109136573904373
14	PreTest, EntryTest, ExitTest, TestEvery2Days, PCR 0D	6	0.00160887365562987	0.0392820664873804	-0.0753839766596356	0.0786017239708954	0.00761701986554668	0.0930783345621467	-0.174816515876261	0.190050555607354	0.00922589352117654	0.107598721953592	-0.201667601507864	0.220119388550217	7.01331282900906e-06	1.78258369504738e-05	-2.79253275939197e-05	4.19519532519378e-05
14	PreTest, EntryTest, ExitTest, TestEvery2Days, PCR 0D	7	0	0	0	0	4.02946728470304e-06	6.48605172914335e-05	-0.000123097146606507	0.000131156081175913	4.02946728470304e-06	6.48605172914335e-05	-0.000123097146606507	0.000131156081175913	1.01967520215873e-06	6.64916188980756e-06	-1.20126821018641e-05	1.40520325061816e-05
14	PreTest, EntryTest, ExitTest, TestEvery2Days, PCR 0D	8	0	0	0	0	1.830088565907e-06	2.25733176396025e-05	-4.24136140077139e-05	4.60737911395279e-05	1.830088565907e-06	2.25733176396025e-05	-4.24136140077139e-05	4.60737911395279e-05	1.15117756847496e-06	7.04953446912437e-06	-1.26659099910088e-05	1.49682651279587e-05
14	PreTest, EntryTest, ExitTest, TestEvery2Days, PCR 0D	9	0	0	0	0	5.1252071131933e-07	7.21805981311568e-06	-1.36348765223874e-05	1.46599179450261e-05	5.1252071131933e-07	7.21805981311568e-06	-1.36348765223874e-05	1.46599179450261e-05	7.11086209823108e-07	5.57937123153906e-06	-1.02244814039934e-05	1.16466538236397e-05
14	PreTest, EntryTest, ExitTest, TestEvery2Days, PCR 0D	10	0	0	0	0	4.84207668379295e-08	7.47311032971785e-07	-1.41630885778677e-06	1.51315039146263e-06	4.84207668379295e-08	7.47311032971785e-07	-1.41630885778677e-06	1.51315039146263e-06	2.66567345560164e-07	3.43283209406036e-06	-6.46178355879814e-06	6.99491824991846e-06
14	PreTest, EntryTest, ExitTest, TestEvery2Days, PCR 0D	11	0	0	0	0	1.24215217289804e-08	1.79152000883279e-07	-3.38716400002247e-07	3.63559443460208e-07	1.24215217289804e-08	1.79152000883279e-07	-3.38716400002247e-07	3.63559443460208e-07	2.22920792747381e-07	3.1462659553856e-06	-5.9437604798084e-06	6.38960206530316e-06
14	PreTest, EntryTest, ExitTest, TestEvery2Days, PCR 0D	12	0	0	0	0	2.54280720975713e-09	8.04106243353007e-08	-1.55062016487432e-07	1.60147630906946e-07	2.54280720975713e-09	8.04106243353007e-08	-1.55062016487432e-07	1.60147630906946e-07	4.41481612290848e-08	1.39608743992247e-06	-2.69218322101895e-06	2.78047954347712e-06
14	PreTest, EntryTest, ExitTest, TestEvery2Days, PCR 0D	13	0	0	0	0	0	0	0	0	0	0	0	0	0	0	0	0
14	PreTest, EntryTest, ExitTest, TestEvery2Days, PCR 0D	14	0	0	0	0	0	0	0	0	0	0	0	0	0	0	0	0
14	PreTest, EntryTest, ExitTest, TestEvery2Days, PCR 0D	15	0	0	0	0	0	0	0	0	0	0	0	0	0	0	0	0
14	PreTest, EntryTest, ExitTest, TestEvery2Days, PCR 0D	16	0	0	0	0	0	0	0	0	0	0	0	0	0	0	0	0
14	PreTest, EntryTest, ExitTest, TestEvery2Days, PCR 0D	17	0	0	0	0	0	0	0	0	0	0	0	0	0	0	0	0
14	PreTest, EntryTest, ExitTest, TestEvery2Days, PCR 0D	18	0	0	0	0	0	0	0	0	0	0	0	0	0	0	0	0
14	PreTest, EntryTest, ExitTest, TestEvery2Days, PCR 0D	19	0	0	0	0	0	0	0	0	0	0	0	0	0	0	0	0
14	PreTest, EntryTest, ExitTest, TestEvery2Days, PCR 0D	20	0	0	0	0	0	0	0	0	0	0	0	0	0	0	0	0
14	PreTest, EntryTest, ExitTest, TestEvery2Days, PCR 0D	21	0	0	0	0	0	0	0	0	0	0	0	0	0	0	0	0
15	PreTest, EntryTest, ExitTest, TestEvery2Days, Antigen	0	1515.49903815126	34.0910587423324	1448.68056301629	1582.31751328623	3316.21576515955	55.2189156555176	3207.98669047474	3424.44483984437	4831.71480331082	71.5181421683963	4691.53924466076	4971.89036196087	0.271492357452099	0.00296036373608734	0.265690044529368	0.27729467037483
15	PreTest, EntryTest, ExitTest, TestEvery2Days, Antigen	1	456.020099155638	18.3160422970694	420.120656253382	491.919542057894	1010.55252508649	31.9512247840311	947.928124509788	1073.17692566319	1466.57262424213	41.2433376461147	1385.73568245574	1547.40956602851	0.0850754233886123	0.00190920469612121	0.0813333821842148	0.0888174645930099
15	PreTest, EntryTest, ExitTest, TestEvery2Days, Antigen	2	110.897026158744	9.1921310058911	92.8804493871973	128.91360293029	257.831433373476	15.914696079821	226.638629057026	289.024237689925	368.728459532219	20.7601817309803	328.038503339498	409.418415724941	0.0261538439050164	0.00104490531184928	0.0241058294937918	0.028201858316241
15	PreTest, EntryTest, ExitTest, TestEvery2Days, Antigen	3	2.06875896962711	1.18719147016973	-0.258136311905559	4.39565425115978	5.50607264545707	2.30568662154204	0.986926867234675	10.0252184236795	7.57483161508418	2.83851786801164	2.01133659378136	13.138326636387	0.00328868841664361	0.000384591307398433	0.00253488945414268	0.00404248737914454
15	PreTest, EntryTest, ExitTest, TestEvery2Days, Antigen	4	0.495723455728776	0.590949574722328	-0.662537710726986	1.65398462218454	1.51698219343682	1.23815993490415	-0.909811278975323	3.94377566584896	2.0127056491656	1.55819622029116	-1.04135894260508	5.06677024093627	0.000744870273136905	0.000180422780409755	0.000391241623533785	0.00109849892274002
15	PreTest, EntryTest, ExitTest, TestEvery2Days, Antigen	5	0.007452658170249	0.0668776216248436	-0.123627480214444	0.138532796554942	0.0280505505084338	0.170484599776295	-0.306099265053104	0.362200366069972	0.0355032086786828	0.203194192637492	-0.362757408890802	0.433763826248168	0.000113585717064645	6.89654352110019e-05	-2.15865359489189e-05	0.000248757970078208
15	PreTest, EntryTest, ExitTest, TestEvery2Days, Antigen	6	0.00139724123999438	0.0317944461414377	-0.0609198731972234	0.0637143556772122	0.0118744198192064	0.113378926609888	-0.210348276336173	0.234097115974586	0.0132716610592008	0.123276585135685	-0.228350445806743	0.254893767925144	2.51027833782207e-05	3.32036556154813e-05	-3.99763816281225e-05	9.0181948384564e-05
15	PreTest, EntryTest, ExitTest, TestEvery2Days, Antigen	7	0	0	0	0	3.54366785419352e-05	0.000571956008639872	-0.00108559709839221	0.00115647045547608	3.54366785419352e-05	0.000571956008639872	-0.00108559709839221	0.00115647045547608	5.14886988951026e-06	1.44973789599315e-05	-2.32659928719555e-05	3.3563732650976e-05
15	PreTest, EntryTest, ExitTest, TestEvery2Days, Antigen	8	0	0	0	0	1.41706188025451e-05	0.000182149935509336	-0.000342843254795754	0.000371184492400844	1.41706188025451e-05	0.000182149935509336	-0.000342843254795754	0.000371184492400844	3.50523937719762e-06	1.2135412547394e-05	-2.02801692156946e-05	2.72906479700899e-05
15	PreTest, EntryTest, ExitTest, TestEvery2Days, Antigen	9	0	0	0	0	1.45283218548665e-06	1.62526410028761e-05	-3.04023441801504e-05	3.33080085511237e-05	1.45283218548665e-06	1.62526410028761e-05	-3.04023441801504e-05	3.33080085511237e-05	2.08370545807949e-06	9.59197380208781e-06	-1.67165631940126e-05	2.08839741101716e-05
15	PreTest, EntryTest, ExitTest, TestEvery2Days, Antigen	10	0	0	0	0	3.9293321438986e-07	4.6704166727002e-06	-8.76108346410254e-06	9.54694989288226e-06	3.9293321438986e-07	4.6704166727002e-06	-8.76108346410254e-06	9.54694989288226e-06	1.15469258497315e-06	7.07101422069914e-06	-1.27044952875972e-05	1.50138804575435e-05
15	PreTest, EntryTest, ExitTest, TestEvery2Days, Antigen	11	0	0	0	0	7.24807153497554e-08	9.90886724014576e-07	-1.86965726371881e-06	2.01461869441832e-06	7.24807153497554e-08	9.90886724014576e-07	-1.86965726371881e-06	2.01461869441832e-06	4.88223956526184e-07	4.63176023708647e-06	-8.5900261081633e-06	9.56647402121566e-06
15	PreTest, EntryTest, ExitTest, TestEvery2Days, Antigen	12	0	0	0	0	2.20277941768737e-08	3.04953044968856e-07	-5.75680173962083e-07	6.19735762315831e-07	2.20277941768737e-08	3.04953044968856e-07	-5.75680173962083e-07	6.19735762315831e-07	2.65622186626975e-07	3.42060277627197e-06	-6.43875925486609e-06	6.97000362812004e-06
15	PreTest, EntryTest, ExitTest, TestEvery2Days, Antigen	13	0	0	0	0	0	0	0	0	0	0	0	0	0	0	0	0
15	PreTest, EntryTest, ExitTest, TestEvery2Days, Antigen	14	0	0	0	0	0	0	0	0	0	0	0	0	0	0	0	0
15	PreTest, EntryTest, ExitTest, TestEvery2Days, Antigen	15	0	0	0	0	0	0	0	0	0	0	0	0	0	0	0	0
15	PreTest, EntryTest, ExitTest, TestEvery2Days, Antigen	16	0	0	0	0	0	0	0	0	0	0	0	0	0	0	0	0
15	PreTest, EntryTest, ExitTest, TestEvery2Days, Antigen	17	0	0	0	0	0	0	0	0	0	0	0	0	0	0	0	0
15	PreTest, EntryTest, ExitTest, TestEvery2Days, Antigen	18	0	0	0	0	0	0	0	0	0	0	0	0	0	0	0	0
15	PreTest, EntryTest, ExitTest, TestEvery2Days, Antigen	19	0	0	0	0	0	0	0	0	0	0	0	0	0	0	0	0
15	PreTest, EntryTest, ExitTest, TestEvery2Days, Antigen	20	0	0	0	0	0	0	0	0	0	0	0	0	0	0	0	0
15	PreTest, EntryTest, ExitTest, TestEvery2Days, Antigen	21	0	0	0	0	0	0	0	0	0	0	0	0	0	0	0	0
16	PreTest, EntryTest, ExitTest, TestEvery2Days, PCR 1D	0	1693.15541196812	35.8102481813402	1622.96732553269	1763.34349840355	3705.2222023342	59.6012522308888	3588.40374796166	3822.04065670674	5398.37761430232	76.9493022386515	5247.55698191456	5549.19824669008	0.255400928759074	0.0029821682583093	0.249555878972788	0.26124597854536
16	PreTest, EntryTest, ExitTest, TestEvery2Days, PCR 1D	1	1618.68990843612	34.5201441663839	1551.03042587001	1686.34939100223	3702.45197571655	59.5846239999257	3585.6661126767	3819.23783875641	5321.14188415267	76.4127801532685	5171.37283505227	5470.91093325308	0.228007416622784	0.00285706807702591	0.222407563191813	0.233607270053754
16	PreTest, EntryTest, ExitTest, TestEvery2Days, PCR 1D	2	270.627687272163	14.6597556419672	241.894566213907	299.360808330419	636.288686658479	24.2893232543083	588.681613080035	683.895760236924	906.916373930642	32.0231135216092	844.151071428288	969.681676432996	0.0378195966974986	0.00123838364962702	0.0353923647442296	0.0402468286507675
16	PreTest, EntryTest, ExitTest, TestEvery2Days, PCR 1D	3	53.6126092670506	5.91020015417009	42.0286169648772	65.1966015692239	152.892461942615	12.1294663541918	129.118707888399	176.666215996831	206.505071209665	15.367858868993	176.384067826439	236.626074592892	0.00896630062930809	0.000625620722216941	0.00774008401376288	0.0101925172448533
16	PreTest, EntryTest, ExitTest, TestEvery2Days, PCR 1D	4	0.839958866463584	0.745650705752223	-0.621516516810773	2.30143424973794	2.62584506356721	1.6162405942377	-0.541986501138673	5.7936766282731	3.4658039300308	1.99312430437962	-0.440719706553251	7.37232756661485	0.000263811915726729	0.000106631777657487	5.48136315180557e-05	0.000472810199935403
16	PreTest, EntryTest, ExitTest, TestEvery2Days, PCR 1D	5	0.199412269274591	0.344071272826465	-0.47496742546528	0.873791964014461	0.682491161747919	0.813431284407125	-0.911834155690047	2.27681647918588	0.88190343102251	0.996557881294712	-1.07135001631513	2.83515687836015	6.72553525034791e-05	5.68163641281267e-05	-4.41047211876493e-05	0.000178615426194607
16	PreTest, EntryTest, ExitTest, TestEvery2Days, PCR 1D	6	0.00109018541989472	0.0203244818485363	-0.0387457990032365	0.040926169843026	0.00883588247972098	0.0969554799592015	-0.181196858240314	0.198868623199756	0.0099260678996157	0.109188938423388	-0.204084251410224	0.223936387209456	4.08037670171352e-06	1.32772840232498e-05	-2.1943099983856e-05	3.01038533872831e-05
16	PreTest, EntryTest, ExitTest, TestEvery2Days, PCR 1D	7	0.00108553362515016	0.028239341523948	-0.0542635757617878	0.0564346430120881	0.00283216601648586	0.0575117138844813	-0.109890793197098	0.115555125230069	0.00391769964163603	0.0694812588935924	-0.132265567789805	0.140100967073077	2.48486484198045e-06	1.03959962649716e-05	-1.78912878373639e-05	2.28610175213248e-05
16	PreTest, EntryTest, ExitTest, TestEvery2Days, PCR 1D	8	0	0	0	0	9.30571988859862e-07	1.30998940654832e-05	-2.47452203794872e-05	2.6606364357207e-05	9.30571988859862e-07	1.30998940654832e-05	-2.47452203794872e-05	2.6606364357207e-05	1.06459910745351e-06	7.0746776825906e-06	-1.28017691504241e-05	1.49309673653311e-05
16	PreTest, EntryTest, ExitTest, TestEvery2Days, PCR 1D	9	0	0	0	0	8.13453643040731e-07	1.3896678624697e-05	-2.64240364613654e-05	2.80509437474469e-05	8.13453643040731e-07	1.3896678624697e-05	-2.64240364613654e-05	2.80509437474469e-05	1.24087030885076e-06	7.57757497982104e-06	-1.36111766515985e-05	1.60929172693e-05
16	PreTest, EntryTest, ExitTest, TestEvery2Days, PCR 1D	10	0	0	0	0	1.95949140946581e-08	5.15712661447626e-07	-9.91201902342688e-07	1.030391730532e-06	1.95949140946581e-08	5.15712661447626e-07	-9.91201902342688e-07	1.030391730532e-06	8.92542474633758e-08	1.99479109003777e-06	-3.82053628901066e-06	3.99904478393741e-06
16	PreTest, EntryTest, ExitTest, TestEvery2Days, PCR 1D	11	0	0	0	0	2.80196258314741e-09	8.86058368131473e-08	-1.70865477570621e-07	1.76469402736916e-07	2.80196258314741e-09	8.86058368131473e-08	-1.70865477570621e-07	1.76469402736916e-07	4.40276493638005e-08	1.39227652012873e-06	-2.68483433008851e-06	2.77288962881611e-06
16	PreTest, EntryTest, ExitTest, TestEvery2Days, PCR 1D	12	0	0	0	0	0	0	0	0	0	0	0	0	0	0	0	0
16	PreTest, EntryTest, ExitTest, TestEvery2Days, PCR 1D	13	0	0	0	0	0	0	0	0	0	0	0	0	0	0	0	0
16	PreTest, EntryTest, ExitTest, TestEvery2Days, PCR 1D	14	0	0	0	0	0	0	0	0	0	0	0	0	0	0	0	0
16	PreTest, EntryTest, ExitTest, TestEvery2Days, PCR 1D	15	0	0	0	0	0	0	0	0	0	0	0	0	0	0	0	0
16	PreTest, EntryTest, ExitTest, TestEvery2Days, PCR 1D	16	0	0	0	0	0	0	0	0	0	0	0	0	0	0	0	0
16	PreTest, EntryTest, ExitTest, TestEvery2Days, PCR 1D	17	0	0	0	0	0	0	0	0	0	0	0	0	0	0	0	0
16	PreTest, EntryTest, ExitTest, TestEvery2Days, PCR 1D	18	0	0	0	0	0	0	0	0	0	0	0	0	0	0	0	0
16	PreTest, EntryTest, ExitTest, TestEvery2Days, PCR 1D	19	0	0	0	0	0	0	0	0	0	0	0	0	0	0	0	0
16	PreTest, EntryTest, ExitTest, TestEvery2Days, PCR 1D	20	0	0	0	0	0	0	0	0	0	0	0	0	0	0	0	0
16	PreTest, EntryTest, ExitTest, TestEvery2Days, PCR 1D	21	0	0	0	0	0	0	0	0	0	0	0	0	0	0	0	0
17	PreTest, EntryTest, ExitTest, TestEvery2Days, PCR 2D	0	1824.29982596261	37.0625609357456	1751.65720652855	1896.94244539667	4004.54079179012	60.1901461104936	3886.56810541355	4122.51347816668	5828.84061775273	78.5346750943313	5674.91265456784	5982.76858093762	0.254494298171581	0.00281976221413294	0.248967564231881	0.260021032111282
17	PreTest, EntryTest, ExitTest, TestEvery2Days, PCR 2D	1	1735.4806305311	36.1092843659688	1664.7064331738	1806.2548278884	3995.34465154223	59.9722760544357	3877.79899047553	4112.89031260892	5730.82528207333	77.8473894823053	5578.24439868801	5883.40616545865	0.234345601126027	0.00275604103420424	0.228943760698987	0.239747441553068
17	PreTest, EntryTest, ExitTest, TestEvery2Days, PCR 2D	2	1294.25314397125	29.6775985749272	1236.08505076439	1352.42123717811	3683.36280630176	57.1956426901857	3571.259346629	3795.46626597452	4977.61595027301	72.4565053820778	4835.60119972414	5119.63070082188	0.203297485748573	0.00262683119611217	0.198148896604193	0.208446074892952
17	PreTest, EntryTest, ExitTest, TestEvery2Days, PCR 2D	3	192.273640872542	10.7816104019082	171.141684484802	213.405597260282	621.072398785582	24.5495682328551	572.955245049186	669.189552521978	813.346039658124	30.2632823528466	754.030006246545	872.662073069704	0.0330019819418244	0.00119155196115594	0.0306665400979588	0.0353374237856901
17	PreTest, EntryTest, ExitTest, TestEvery2Days, PCR 2D	4	28.6538306636894	3.94727241522305	20.9171767298522	36.3904845975266	114.344945092893	10.2491297197001	94.2566508422812	134.433239343506	142.998775756583	12.4303776155174	118.635235630169	167.362315882997	0.00673216601308959	0.000551557717520762	0.00565111288674889	0.00781321913943028
17	PreTest, EntryTest, ExitTest, TestEvery2Days, PCR 2D	5	0.570375838408441	0.592763483873379	-0.591440589983381	1.73219226680026	2.18678427997635	1.41566319773343	-0.587915587581176	4.96148414753387	2.75716011838479	1.70966630502869	-0.593785839471436	6.10810607624101	0.00013612033233626	7.94360752529356e-05	-1.95743751594939e-05	0.000291815039832014
17	PreTest, EntryTest, ExitTest, TestEvery2Days, PCR 2D	6	0.105331164285306	0.241332583089572	-0.367680698570254	0.578343027140867	0.490731252783913	0.659957278073249	-0.802785012239655	1.78424751780748	0.596062417069219	0.787512934614615	-0.947462934775427	2.13958776891387	3.8545054262176e-05	4.2464778435713e-05	-4.46859114718215e-05	0.000121776019996173
17	PreTest, EntryTest, ExitTest, TestEvery2Days, PCR 2D	7	0.00271647599750558	0.0462518596796061	-0.0879371689745223	0.0933701209695334	0.00804120291727413	0.0911189975370767	-0.170552032255396	0.186634438089944	0.0107576789147797	0.113584130076129	-0.211867216034432	0.233382573863992	1.59635860049888e-06	8.26501070715744e-06	-1.46030623855297e-05	1.77957795865275e-05
17	PreTest, EntryTest, ExitTest, TestEvery2Days, PCR 2D	8	0.000912859491706685	0.0288671517749671	-0.0556667579872288	0.0574924769706422	0.00334867021827309	0.0714099358183968	-0.136614803985785	0.143312144422331	0.00426152970997977	0.0800307579336507	-0.152598755839976	0.161121815259935	1.59563042919788e-06	8.7261778295484e-06	-1.5507678116717e-05	1.86989389751127e-05
17	PreTest, EntryTest, ExitTest, TestEvery2Days, PCR 2D	9	0	0	0	0	2.02056257504858e-06	4.8996005544784e-05	-9.4011608292728e-05	9.80527334428251e-05	2.02056257504858e-06	4.8996005544784e-05	-9.4011608292728e-05	9.80527334428251e-05	7.99260446018606e-07	5.90655119354595e-06	-1.07775798933314e-05	1.23761007853687e-05
17	PreTest, EntryTest, ExitTest, TestEvery2Days, PCR 2D	10	0	0	0	0	0.000757646944041987	0.0239560045551455	-0.0461961219840433	0.0477114158721272	0.000757646944041987	0.0239560045551455	-0.0461961219840433	0.0477114158721272	5.33825699816204e-07	4.84632734528507e-06	-8.96497589694253e-06	1.00326272965749e-05
17	PreTest, EntryTest, ExitTest, TestEvery2Days, PCR 2D	11	0	0	0	0	1.14079500346013e-07	3.00734488757204e-06	-5.78031647929519e-06	6.00847547998721e-06	1.14079500346013e-07	3.00734488757204e-06	-5.78031647929519e-06	6.00847547998721e-06	1.31803017291031e-07	2.40397785339572e-06	-4.57999357536458e-06	4.84359960994665e-06
17	PreTest, EntryTest, ExitTest, TestEvery2Days, PCR 2D	12	0	0	0	0	1.28145431749164e-08	2.53129508289427e-07	-4.83319293072361e-07	5.08948379422194e-07	1.28145431749164e-08	2.53129508289427e-07	-4.83319293072361e-07	5.08948379422194e-07	1.32639946021104e-07	2.41927579276745e-06	-4.6091406078031e-06	4.87442049984531e-06
17	PreTest, EntryTest, ExitTest, TestEvery2Days, PCR 2D	13	0	0	0	0	0	0	0	0	0	0	0	0	0	0	0	0
17	PreTest, EntryTest, ExitTest, TestEvery2Days, PCR 2D	14	0	0	0	0	0	0	0	0	0	0	0	0	0	0	0	0
17	PreTest, EntryTest, ExitTest, TestEvery2Days, PCR 2D	15	0	0	0	0	0	0	0	0	0	0	0	0	0	0	0	0
17	PreTest, EntryTest, ExitTest, TestEvery2Days, PCR 2D	16	0	0	0	0	0	0	0	0	0	0	0	0	0	0	0	0
17	PreTest, EntryTest, ExitTest, TestEvery2Days, PCR 2D	17	0	0	0	0	0	0	0	0	0	0	0	0	0	0	0	0
17	PreTest, EntryTest, ExitTest, TestEvery2Days, PCR 2D	18	0	0	0	0	0	0	0	0	0	0	0	0	0	0	0	0
17	PreTest, EntryTest, ExitTest, TestEvery2Days, PCR 2D	19	0	0	0	0	0	0	0	0	0	0	0	0	0	0	0	0
17	PreTest, EntryTest, ExitTest, TestEvery2Days, PCR 2D	20	0	0	0	0	0	0	0	0	0	0	0	0	0	0	0	0
17	PreTest, EntryTest, ExitTest, TestEvery2Days, PCR 2D	21	0	0	0	0	0	0	0	0	0	0	0	0	0	0	0	0
18	PreTest, EntryTest, ExitTest, TestEvery3Days, PCR 0D	0	1353.58639718656	31.9847651638848	1290.89625746535	1416.27653690778	2958.73014122984	51.8092978129488	2857.18391751646	3060.27636494322	4312.3165384164	68.2555473512118	4178.53566560802	4446.09741122477	0.234167301536621	0.00281513161637876	0.228649643568519	0.239684959504724
18	PreTest, EntryTest, ExitTest, TestEvery3Days, PCR 0D	1	276.946700374448	15.1706684150915	247.212190280868	306.681210468027	614.763921520785	24.6761132943791	566.398739463802	663.129103577768	891.710621895233	32.807509654031	827.407902973332	956.013340817133	0.0494811421023137	0.0014637872229832	0.0466121191452667	0.0523501650593608
18	PreTest, EntryTest, ExitTest, TestEvery3Days, PCR 0D	2	64.1605288065323	7.11210051714588	50.2208117929264	78.1002458201382	149.282949316643	12.1334953101538	125.501298508742	173.064600124545	213.443478123175	15.9219430492676	182.236469746611	244.65048649974	0.0139796504442389	0.000766619346438162	0.0124770765252201	0.0154822243632577
18	PreTest, EntryTest, ExitTest, TestEvery3Days, PCR 0D	3	10.8318880011573	2.76485646726501	5.41276932531789	16.2510066769967	29.2325143660682	5.24159939610914	18.9589795496943	39.5060491824421	40.0644023672255	6.66206080384364	27.006763191692	53.122041542759	0.00325970171133297	0.000370722450212705	0.00253308570891607	0.00398631771374988
18	PreTest, EntryTest, ExitTest, TestEvery3Days, PCR 0D	4	0.0847859467766316	0.243643795652121	-0.392755892701525	0.562327786254788	0.297123649268124	0.526128223333239	-0.734087668465025	1.32833496700127	0.381909596044756	0.640916941510019	-0.874287609314882	1.63810680140439	0.000316258156921841	0.000116913463276714	8.7107768899481e-05	0.000545408544944201
18	PreTest, EntryTest, ExitTest, TestEvery3Days, PCR 0D	5	0.0319700001781948	0.140412377432245	-0.243238259589006	0.307178259945395	0.114595167526984	0.295174817636257	-0.463947475040081	0.693137810094048	0.146565167705178	0.374859969381687	-0.588160372282929	0.881290707693285	8.21384709037153e-05	5.89133776043561e-05	-3.33317492008227e-05	0.000197608691008253
18	PreTest, EntryTest, ExitTest, TestEvery3Days, PCR 0D	6	0.00570911838768828	0.062283976324117	-0.116367475207581	0.127785711982958	0.0442489809220137	0.175345420925892	-0.299428044092735	0.387926005936762	0.049958099309702	0.201295779694821	-0.344581628892147	0.444497827511551	5.23004724796585e-05	4.58105296322611e-05	-3.74881655995734e-05	0.00014208911055889
18	PreTest, EntryTest, ExitTest, TestEvery3Days, PCR 0D	7	0	0	0	0	0.000378578868534789	0.00220548997894499	-0.0039441814901974	0.00470133922726698	0.000378578868534789	0.00220548997894499	-0.0039441814901974	0.00470133922726698	1.70765241028143e-05	2.74433594368101e-05	-3.67124603933334e-05	7.0865508598962e-05
18	PreTest, EntryTest, ExitTest, TestEvery3Days, PCR 0D	8	0	0	0	0	0.000134064862750957	0.000761924671874798	-0.00135930749412365	0.00162743721962556	0.000134064862750957	0.000761924671874798	-0.00135930749412365	0.00162743721962556	2.62515098532852e-05	3.45641435771286e-05	-4.14942115578869e-05	9.39972312644574e-05
18	PreTest, EntryTest, ExitTest, TestEvery3Days, PCR 0D	9	0	0	0	0	0.000105990953208191	0.001904645627388	-0.00362711447647229	0.00383909638288867	0.000105990953208191	0.001904645627388	-0.00362711447647229	0.00383909638288867	3.09575954053641e-05	3.70393407136588e-05	-4.16395123934072e-05	0.000103554703204135
18	PreTest, EntryTest, ExitTest, TestEvery3Days, PCR 0D	10	0	0	0	0	4.64545155973334e-06	2.202804387788e-05	-3.85295144409114e-05	4.78204175603781e-05	4.64545155973334e-06	2.202804387788e-05	-3.85295144409114e-05	4.78204175603781e-05	1.4325647289747e-05	2.49675736870657e-05	-3.46107971369018e-05	6.32620917163957e-05
18	PreTest, EntryTest, ExitTest, TestEvery3Days, PCR 0D	11	0	0	0	0	1.49476144003024e-06	9.66437238277284e-06	-1.74474084302045e-05	2.0436931310265e-05	1.49476144003024e-06	9.66437238277284e-06	-1.74474084302045e-05	2.0436931310265e-05	6.69701989664268e-06	1.66138771659437e-05	-2.5866179348607e-05	3.92602191418924e-05
18	PreTest, EntryTest, ExitTest, TestEvery3Days, PCR 0D	12	0	0	0	0	3.11217952403247e-07	1.94377666962535e-06	-3.49858432006243e-06	4.12102022486892e-06	3.11217952403247e-07	1.94377666962535e-06	-3.49858432006243e-06	4.12102022486892e-06	2.44086304826677e-06	1.03158090491015e-05	-1.77781226879721e-05	2.26598487845056e-05
18	PreTest, EntryTest, ExitTest, TestEvery3Days, PCR 0D	13	0	0	0	0	1.61405042160709e-08	2.62854386504918e-07	-4.99054093333568e-07	5.3133510176571e-07	1.61405042160709e-08	2.62854386504918e-07	-4.99054093333568e-07	5.3133510176571e-07	1.76795595979595e-07	2.79121457733465e-06	-5.29398497559632e-06	5.64757616755551e-06
18	PreTest, EntryTest, ExitTest, TestEvery3Days, PCR 0D	14	0	0	0	0	0	0	0	0	0	0	0	0	0	0	0	0
18	PreTest, EntryTest, ExitTest, TestEvery3Days, PCR 0D	15	0	0	0	0	0	0	0	0	0	0	0	0	0	0	0	0
18	PreTest, EntryTest, ExitTest, TestEvery3Days, PCR 0D	16	0	0	0	0	0	0	0	0	0	0	0	0	0	0	0	0
18	PreTest, EntryTest, ExitTest, TestEvery3Days, PCR 0D	17	0	0	0	0	0	0	0	0	0	0	0	0	0	0	0	0
18	PreTest, EntryTest, ExitTest, TestEvery3Days, PCR 0D	18	0	0	0	0	0	0	0	0	0	0	0	0	0	0	0	0
18	PreTest, EntryTest, ExitTest, TestEvery3Days, PCR 0D	19	0	0	0	0	0	0	0	0	0	0	0	0	0	0	0	0
18	PreTest, EntryTest, ExitTest, TestEvery3Days, PCR 0D	20	0	0	0	0	0	0	0	0	0	0	0	0	0	0	0	0
18	PreTest, EntryTest, ExitTest, TestEvery3Days, PCR 0D	21	0	0	0	0	0	0	0	0	0	0	0	0	0	0	0	0
19	PreTest, EntryTest, ExitTest, TestEvery3Days, Antigen	0	1515.49903815126	34.0910587423324	1448.68056301629	1582.31751328623	3316.21576515955	55.2189156555176	3207.98669047474	3424.44483984437	4831.71480331082	71.5181421683963	4691.53924466076	4971.89036196087	0.271492357452099	0.00296036373608734	0.265690044529368	0.27729467037483
19	PreTest, EntryTest, ExitTest, TestEvery3Days, Antigen	1	456.020099155638	18.3160422970694	420.120656253382	491.919542057894	1010.55252508649	31.9512247840311	947.928124509788	1073.17692566319	1466.57262424213	41.2433376461147	1385.73568245574	1547.40956602851	0.0850754233886123	0.00190920469612121	0.0813333821842148	0.0888174645930099
19	PreTest, EntryTest, ExitTest, TestEvery3Days, Antigen	2	110.897026158744	9.1921310058911	92.8804493871973	128.91360293029	257.831433373476	15.914696079821	226.638629057026	289.024237689925	368.728459532219	20.7601817309803	328.038503339498	409.418415724941	0.0261538439050164	0.00104490531184928	0.0241058294937918	0.028201858316241
19	PreTest, EntryTest, ExitTest, TestEvery3Days, Antigen	3	16.7422689204505	3.54188915143423	9.80016618363945	23.6843716572616	45.0303196342873	6.69779247353688	31.902646386155	58.1579928824196	61.7725885547378	8.50476644128678	45.1032463298158	78.4419307796599	0.00608634712572812	0.000539687636405873	0.00502855935837261	0.00714413489308364
19	PreTest, EntryTest, ExitTest, TestEvery3Days, Antigen	4	0.169144616375738	0.333179217387172	-0.483886649703119	0.822175882454594	0.575759563326327	0.705711566004046	-0.807435106041604	1.95895423269426	0.744904179702064	0.87397378291931	-0.968084434819784	2.45789279422391	0.000798459877530602	0.000192034494240692	0.000422072268818845	0.00117484748624236
19	PreTest, EntryTest, ExitTest, TestEvery3Days, Antigen	5	0.0555344432270513	0.192512505304549	-0.321790067169864	0.432858953623967	0.19342843733883	0.40319581874503	-0.596835367401428	0.983692242079088	0.248962880565881	0.502472287062084	-0.735882802075802	1.23380856320756	0.000200179941864425	9.01050810119174e-05	2.35739830810672e-05	0.000376785900647784
19	PreTest, EntryTest, ExitTest, TestEvery3Days, Antigen	6	0.0158645157219787	0.103686766295072	-0.187361546216363	0.21909057766032	0.070292180856845	0.238629603282756	-0.397421841577356	0.538006203291046	0.0861566965788236	0.289336651575686	-0.480943140509521	0.653256533667168	0.000108442873147128	7.07845394403776e-05	-3.02948241560125e-05	0.000247180570450268
19	PreTest, EntryTest, ExitTest, TestEvery3Days, Antigen	7	0.000285002478874116	0.00901256972036228	-0.017379634173036	0.0179496391307842	0.0021975723984236	0.0361547004102126	-0.068665640405593	0.0730607852024402	0.00248257487729772	0.0449948101150693	-0.0857072529482381	0.0906724027028335	5.25200003062355e-05	4.83403147458712e-05	-4.2227016595672e-05	0.000147267017208143
19	PreTest, EntryTest, ExitTest, TestEvery3Days, Antigen	8	0.00110915119774065	0.0350744405436427	-0.067636752267799	0.0698550546632804	0.000851356755088778	0.0161782310301658	-0.0308579760640363	0.0325606895742138	0.00196050795282943	0.0512243696650747	-0.0984392565907171	0.102360272496376	7.37612674447716e-05	5.73356440275992e-05	-3.86165948493228e-05	0.000186139129738866
19	PreTest, EntryTest, ExitTest, TestEvery3Days, Antigen	9	0	0	0	0	0.000148809562560651	0.000665775663032695	-0.00115611073698343	0.00145372986210473	0.000148809562560651	0.000665775663032695	-0.00115611073698343	0.00145372986210473	8.16222484155404e-05	6.14157924788816e-05	-3.87527048430676e-05	0.000201997201674148
19	PreTest, EntryTest, ExitTest, TestEvery3Days, Antigen	10	0	0	0	0	1.35436991455684e-05	3.27166481115592e-05	-5.05809311530876e-05	7.76683294442244e-05	1.35436991455684e-05	3.27166481115592e-05	-5.05809311530876e-05	7.76683294442244e-05	4.43986373582668e-05	4.54829434934973e-05	-4.47479318889879e-05	0.000133545206605522
19	PreTest, EntryTest, ExitTest, TestEvery3Days, Antigen	11	0	0	0	0	4.94548747062979e-06	2.7370820496255e-05	-4.870132070203e-05	5.85922956432896e-05	4.94548747062979e-06	2.7370820496255e-05	-4.870132070203e-05	5.85922956432896e-05	1.88515213462407e-05	2.95188807456049e-05	-3.90054849151449e-05	7.67085276076262e-05
19	PreTest, EntryTest, ExitTest, TestEvery3Days, Antigen	12	0	0	0	0	9.69210793045741e-07	6.14521602914935e-06	-1.1075412624087e-05	1.30138342101785e-05	9.69210793045741e-07	6.14521602914935e-06	-1.1075412624087e-05	1.30138342101785e-05	5.76831121978284e-06	1.61955458258241e-05	-2.59749585988325e-05	3.75115810383982e-05
19	PreTest, EntryTest, ExitTest, TestEvery3Days, Antigen	13	0	0	0	0	1.84017944220379e-07	1.53432758839969e-06	-2.82326412904302e-06	3.19130001748378e-06	1.84017944220379e-07	1.53432758839969e-06	-2.82326412904302e-06	3.19130001748378e-06	1.37576113117059e-06	8.19444506175402e-06	-1.46853511898673e-05	1.74368734522085e-05
19	PreTest, EntryTest, ExitTest, TestEvery3Days, Antigen	14	0	0	0	0	3.45692779020072e-08	4.39744670002361e-07	-8.2733027530262e-07	8.96468831106634e-07	3.45692779020072e-08	4.39744670002361e-07	-8.2733027530262e-07	8.96468831106634e-07	3.55449959235326e-07	3.96014271859607e-06	-7.40642976921296e-06	8.11732968768362e-06
19	PreTest, EntryTest, ExitTest, TestEvery3Days, Antigen	15	0	0	0	0	7.56602505228144e-09	1.40044745839498e-07	-2.66921676793135e-07	2.82053726897698e-07	7.56602505228144e-09	1.40044745839498e-07	-2.66921676793135e-07	2.82053726897698e-07	1.32732407162539e-07	2.42094930918404e-06	-4.61232823883818e-06	4.87779305316326e-06
19	PreTest, EntryTest, ExitTest, TestEvery3Days, Antigen	16	0	0	0	0	0	0	0	0	0	0	0	0	0	0	0	0
19	PreTest, EntryTest, ExitTest, TestEvery3Days, Antigen	17	0	0	0	0	0	0	0	0	0	0	0	0	0	0	0	0
19	PreTest, EntryTest, ExitTest, TestEvery3Days, Antigen	18	0	0	0	0	0	0	0	0	0	0	0	0	0	0	0	0
19	PreTest, EntryTest, ExitTest, TestEvery3Days, Antigen	19	0	0	0	0	0	0	0	0	0	0	0	0	0	0	0	0
19	PreTest, EntryTest, ExitTest, TestEvery3Days, Antigen	20	0	0	0	0	0	0	0	0	0	0	0	0	0	0	0	0
19	PreTest, EntryTest, ExitTest, TestEvery3Days, Antigen	21	0	0	0	0	0	0	0	0	0	0	0	0	0	0	0	0
20	PreTest, EntryTest, ExitTest, TestEvery3Days, PCR 1D	0	1693.15541196812	35.8102481813402	1622.96732553269	1763.34349840355	3705.2222023342	59.6012522308888	3588.40374796166	3822.04065670674	5398.37761430232	76.9493022386515	5247.55698191456	5549.19824669008	0.255400928759074	0.0029821682583093	0.249555878972788	0.26124597854536
20	PreTest, EntryTest, ExitTest, TestEvery3Days, PCR 1D	1	1618.68990843612	34.5201441663839	1551.03042587001	1686.34939100223	3702.45197571655	59.5846239999257	3585.6661126767	3819.23783875641	5321.14188415267	76.4127801532685	5171.37283505227	5470.91093325308	0.228007416622784	0.00285706807702591	0.222407563191813	0.233607270053754
20	PreTest, EntryTest, ExitTest, TestEvery3Days, PCR 1D	2	270.627687272163	14.6597556419672	241.894566213907	299.360808330419	636.288686658479	24.2893232543083	588.681613080035	683.895760236924	906.916373930642	32.0231135216092	844.151071428288	969.681676432996	0.0378195966974986	0.00123838364962702	0.0353923647442296	0.0402468286507675
20	PreTest, EntryTest, ExitTest, TestEvery3Days, PCR 1D	3	53.6126092670506	5.91020015417009	42.0286169648772	65.1966015692239	152.892461942615	12.1294663541918	129.118707888399	176.666215996831	206.505071209665	15.367858868993	176.384067826439	236.626074592892	0.00896630062930809	0.000625620722216941	0.00774008401376288	0.0101925172448533
20	PreTest, EntryTest, ExitTest, TestEvery3Days, PCR 1D	4	7.5241415727964	2.18207745101337	3.2472697688102	11.8010133767826	26.0414729365761	4.98313241079849	16.2745334114111	35.8084124617412	33.5656145093725	6.04576317233365	21.7159186915986	45.4153103271465	0.0017000509392015	0.000265633316173957	0.00117940963950055	0.00222069223890246
20	PreTest, EntryTest, ExitTest, TestEvery3Days, PCR 1D	5	0.080221945486203	0.221122634656392	-0.353178418440325	0.513622309412731	0.263212916998198	0.484556578289825	-0.686517976449859	1.21294381044626	0.343434862484401	0.612549725009583	-0.857162598534383	1.54403232350318	5.37703712193181e-05	4.85675331293031e-05	-4.14219937141159e-05	0.000148962736152752
20	PreTest, EntryTest, ExitTest, TestEvery3Days, PCR 1D	6	0.0186278629556188	0.110428726255945	-0.197812440506033	0.235068166417271	0.087146867822713	0.281591312883607	-0.464772105429156	0.639065841074582	0.105774730778332	0.331952439495132	-0.544852050632126	0.75640151218879	3.20255348290907e-05	3.76274376912255e-05	-4.17242430457113e-05	0.000105775312703893
20	PreTest, EntryTest, ExitTest, TestEvery3Days, PCR 1D	7	0.00508589917575706	0.0568253584622499	-0.106291803410253	0.116463601761767	0.0230374105139211	0.136557901134441	-0.244616075709583	0.290690896737425	0.0281233096896782	0.168396120477689	-0.301933086446593	0.358179705825949	4.64430820612215e-05	4.64146134879186e-05	-4.45295603750989e-05	0.000137415724497542
20	PreTest, EntryTest, ExitTest, TestEvery3Days, PCR 1D	8	0	0	0	0	8.33098707307005e-05	0.000505900246832169	-0.000908254613060351	0.00107487435452175	8.33098707307005e-05	0.000505900246832169	-0.000908254613060351	0.00107487435452175	1.88987470966489e-05	2.83659064805833e-05	-3.66984296052943e-05	7.4495923798592e-05
20	PreTest, EntryTest, ExitTest, TestEvery3Days, PCR 1D	9	0	0	0	0	0.000586478782666376	0.0176697805213291	-0.0340462910391386	0.0352192486044714	0.000586478782666376	0.0176697805213291	-0.0340462910391386	0.0352192486044714	2.39965814865045e-05	3.3400762148327e-05	-4.14689123242165e-05	8.94620752972254e-05
20	PreTest, EntryTest, ExitTest, TestEvery3Days, PCR 1D	10	0	0	0	0	8.24101628797622e-06	4.35128421226587e-05	-7.70441542724349e-05	9.35261868483873e-05	8.24101628797622e-06	4.35128421226587e-05	-7.70441542724349e-05	9.35261868483873e-05	1.83120248936032e-05	2.92954080533325e-05	-3.91069748909285e-05	7.57310246781349e-05
20	PreTest, EntryTest, ExitTest, TestEvery3Days, PCR 1D	11	0	0	0	0	1.04158477021535e-06	4.72660319765615e-06	-8.2225574971907e-06	1.03057270376214e-05	1.04158477021535e-06	4.72660319765615e-06	-8.2225574971907e-06	1.03057270376214e-05	5.85531639956949e-06	1.61624823786544e-05	-2.58231490625931e-05	3.75337818617321e-05
20	PreTest, EntryTest, ExitTest, TestEvery3Days, PCR 1D	12	0	0	0	0	3.0368423668303e-07	3.09913641084479e-06	-5.77062312857276e-06	6.37799160193882e-06	3.0368423668303e-07	3.09913641084479e-06	-5.77062312857276e-06	6.37799160193882e-06	1.95077728690934e-06	9.30856019270811e-06	-1.62940006907986e-05	2.01955552646172e-05
20	PreTest, EntryTest, ExitTest, TestEvery3Days, PCR 1D	13	0	0	0	0	4.04597048449662e-08	4.29950163760694e-07	-8.02242616125993e-07	8.83162025815926e-07	4.04597048449662e-08	4.29950163760694e-07	-8.02242616125993e-07	8.83162025815926e-07	5.32529294653439e-07	5.22760121122956e-06	-9.71356907935651e-06	1.07786276686634e-05
20	PreTest, EntryTest, ExitTest, TestEvery3Days, PCR 1D	14	0	0	0	0	2.09619804188383e-09	6.62876023913794e-08	-1.2782750264522e-07	1.32019898728987e-07	2.09619804188383e-09	6.62876023913794e-08	-1.2782750264522e-07	1.32019898728987e-07	4.45235975066785e-08	1.40795977745698e-06	-2.715077566309e-06	2.80412476132236e-06
20	PreTest, EntryTest, ExitTest, TestEvery3Days, PCR 1D	15	0	0	0	0	0	0	0	0	0	0	0	0	0	0	0	0
20	PreTest, EntryTest, ExitTest, TestEvery3Days, PCR 1D	16	0	0	0	0	0	0	0	0	0	0	0	0	0	0	0	0
20	PreTest, EntryTest, ExitTest, TestEvery3Days, PCR 1D	17	0	0	0	0	0	0	0	0	0	0	0	0	0	0	0	0
20	PreTest, EntryTest, ExitTest, TestEvery3Days, PCR 1D	18	0	0	0	0	0	0	0	0	0	0	0	0	0	0	0	0
20	PreTest, EntryTest, ExitTest, TestEvery3Days, PCR 1D	19	0	0	0	0	0	0	0	0	0	0	0	0	0	0	0	0
20	PreTest, EntryTest, ExitTest, TestEvery3Days, PCR 1D	20	0	0	0	0	0	0	0	0	0	0	0	0	0	0	0	0
20	PreTest, EntryTest, ExitTest, TestEvery3Days, PCR 1D	21	0	0	0	0	0	0	0	0	0	0	0	0	0	0	0	0
21	PreTest, EntryTest, ExitTest, TestEvery3Days, PCR 2D	0	1824.29982596261	37.0625609357456	1751.65720652855	1896.94244539667	4004.54079179012	60.1901461104936	3886.56810541355	4122.51347816668	5828.84061775273	78.5346750943313	5674.91265456784	5982.76858093762	0.254494298171581	0.00281976221413294	0.248967564231881	0.260021032111282
21	PreTest, EntryTest, ExitTest, TestEvery3Days, PCR 2D	1	1735.4806305311	36.1092843659688	1664.7064331738	1806.2548278884	3995.34465154223	59.9722760544357	3877.79899047553	4112.89031260892	5730.82528207333	77.8473894823053	5578.24439868801	5883.40616545865	0.234345601126027	0.00275604103420424	0.228943760698987	0.239747441553068
21	PreTest, EntryTest, ExitTest, TestEvery3Days, PCR 2D	2	1294.25314397125	29.6775985749272	1236.08505076439	1352.42123717811	3683.36280630176	57.1956426901857	3571.259346629	3795.46626597452	4977.61595027301	72.4565053820778	4835.60119972414	5119.63070082188	0.203297485748573	0.00262683119611217	0.198148896604193	0.208446074892952
21	PreTest, EntryTest, ExitTest, TestEvery3Days, PCR 2D	3	192.273640872542	10.7816104019082	171.141684484802	213.405597260282	621.072398785582	24.5495682328551	572.955245049186	669.189552521978	813.346039658124	30.2632823528466	754.030006246545	872.662073069704	0.0330019819418244	0.00119155196115594	0.0306665400979588	0.0353374237856901
21	PreTest, EntryTest, ExitTest, TestEvery3Days, PCR 2D	4	28.6538306636894	3.94727241522305	20.9171767298522	36.3904845975266	114.344945092893	10.2491297197001	94.2566508422812	134.433239343506	142.998775756583	12.4303776155174	118.635235630169	167.362315882997	0.00673216601308959	0.000551557717520762	0.00565111288674889	0.00781321913943028
21	PreTest, EntryTest, ExitTest, TestEvery3Days, PCR 2D	5	3.49405367523088	1.40016669684907	0.749726949406696	6.23838040105507	15.9326636923955	3.59547014900429	8.88554220034707	22.9797851844439	19.4267173676264	4.32818253570092	10.9434795976526	27.9099551376002	0.00120823678568001	0.000229729981348225	0.000757966022237492	0.00165850754912253
21	PreTest, EntryTest, ExitTest, TestEvery3Days, PCR 2D	6	0.0501002637286209	0.167470898069411	-0.278142696487425	0.378343223944667	0.210050627021211	0.437552575628725	-0.64755242121109	1.06765367525351	0.260150890749832	0.53748208842674	-0.793314002566579	1.31361578406624	2.54666181407849e-05	3.32336871172814e-05	-3.96714086090865e-05	9.06046448906564e-05
21	PreTest, EntryTest, ExitTest, TestEvery3Days, PCR 2D	7	0.00872661310290461	0.0679651747870509	-0.124485129479715	0.141938355685524	0.0467365194977541	0.206528381390809	-0.358059108028232	0.45153214702374	0.0554631326006587	0.238613506675544	-0.412219340483408	0.523145605684726	2.60353231995926e-05	3.3164161469546e-05	-3.89664332807175e-05	9.10370796799028e-05
21	PreTest, EntryTest, ExitTest, TestEvery3Days, PCR 2D	8	0.00211272401203388	0.0237360330736823	-0.0444099008123834	0.0486353488364512	0.0192922030151256	0.135303721815244	-0.245903091742753	0.284487497773005	0.0214049270271595	0.150953924373572	-0.274464764745042	0.317274618799361	4.58605975635787e-05	4.4020508241881e-05	-4.04195985905081e-05	0.000132140793717665
21	PreTest, EntryTest, ExitTest, TestEvery3Days, PCR 2D	9	0	0	0	0	2.11404171204509e-05	0.000254503098439881	-0.000477685655821717	0.000519966490062619	2.11404171204509e-05	0.000254503098439881	-0.000477685655821717	0.000519966490062619	1.36069828495509e-05	2.35770761365601e-05	-3.26040863781069e-05	5.98180520772086e-05
21	PreTest, EntryTest, ExitTest, TestEvery3Days, PCR 2D	10	0	0	0	0	6.53092892193625e-06	7.22485183220151e-05	-0.000135076166989213	0.000148138024833086	6.53092892193625e-06	7.22485183220151e-05	-0.000135076166989213	0.000148138024833086	1.24182364704257e-05	2.28659810080314e-05	-3.23990863053158e-05	5.72355592461671e-05
21	PreTest, EntryTest, ExitTest, TestEvery3Days, PCR 2D	11	0.000256009193244399	0.00809572152594494	-0.0156116049976077	0.0161236233840965	0.000641609520063806	0.0201615955471661	-0.0388751177523817	0.0401583367925093	0.000897618713308206	0.0282573022365615	-0.0544866936703522	0.0562819310969687	9.84819651958211e-06	2.10370320597343e-05	-3.13843863174972e-05	5.10807793566614e-05
21	PreTest, EntryTest, ExitTest, TestEvery3Days, PCR 2D	12	0	0	0	0	1.99101251851077e-07	2.17188313052273e-06	-4.05778968397348e-06	4.45599218767563e-06	1.99101251851077e-07	2.17188313052273e-06	-4.05778968397348e-06	4.45599218767563e-06	1.37571714776574e-06	7.94914248926457e-06	-1.42046021311928e-05	1.69560364267243e-05
21	PreTest, EntryTest, ExitTest, TestEvery3Days, PCR 2D	13	0	0	0	0	2.5773100423807e-08	3.19385642915767e-07	-6.00222759691095e-07	6.51768960538709e-07	2.5773100423807e-08	3.19385642915767e-07	-6.00222759691095e-07	6.51768960538709e-07	3.55099250056655e-07	3.95627093407455e-06	-7.39919178072946e-06	8.10939028084277e-06
21	PreTest, EntryTest, ExitTest, TestEvery3Days, PCR 2D	14	0	0	0	0	3.92939970380205e-09	8.78367256274258e-08	-1.68230582525953e-07	1.76089381933557e-07	3.92939970380205e-09	8.78367256274258e-08	-1.68230582525953e-07	1.76089381933557e-07	8.90493693287497e-08	1.99029851292843e-06	-3.81193571601096e-06	3.99003445466846e-06
21	PreTest, EntryTest, ExitTest, TestEvery3Days, PCR 2D	15	0	0	0	0	0	0	0	0	0	0	0	0	0	0	0	0
21	PreTest, EntryTest, ExitTest, TestEvery3Days, PCR 2D	16	0	0	0	0	0	0	0	0	0	0	0	0	0	0	0	0
21	PreTest, EntryTest, ExitTest, TestEvery3Days, PCR 2D	17	0	0	0	0	0	0	0	0	0	0	0	0	0	0	0	0
21	PreTest, EntryTest, ExitTest, TestEvery3Days, PCR 2D	18	0	0	0	0	0	0	0	0	0	0	0	0	0	0	0	0
21	PreTest, EntryTest, ExitTest, TestEvery3Days, PCR 2D	19	0	0	0	0	0	0	0	0	0	0	0	0	0	0	0	0
21	PreTest, EntryTest, ExitTest, TestEvery3Days, PCR 2D	20	0	0	0	0	0	0	0	0	0	0	0	0	0	0	0	0
21	PreTest, EntryTest, ExitTest, TestEvery3Days, PCR 2D	21	0	0	0	0	0	0	0	0	0	0	0	0	0	0	0	0
