# Supplementary material for: Border Control for Infectious Respiratory Disease Pandemics: A Modelling Study for H1N1 and Four Strains of SARS-CoV-2
Source: Viruses. 2023 Apr 16;15(4):978. doi: 10.3390/v15040978 (PMC10144227; doi:10.3390/v15040978)
Supplement: Supplementary file 1 [file viruses-15-00978-s001.zip › Table S1.4 - Outcomes for Delta (Vac).csv]

StrategyNo	StrategyDescription	QDays	TR_Sympt_Mean	TR_Sympt_SD	TR_Sympt_2_5th_Percentile	TR_Sympt_97_5th_Percentile	TR_NoSympt_Mean	TR_NoSympt_SD	TR_NoSympt_2_5th_Percentile	TR_NoSympt_97_5th_Percentile	TR_Total_Mean	TR_Total_SD	TR_Total_2_5th_Percentile	TR_Total_97_5th_Percentile	Missed_Proportion_Mean	Missed_Proportion_SD	Missed_Proportion_2_5th_Percentile	Missed_Proportion_97_5th_Percentile
1	Quarantine Only	0	3037.5329580872	42.0533699362519	2955.10835301214	3119.95756316225	9564.19662746087	87.9648645596623	9391.78549292393	9736.60776199781	12601.7295855481	105.776272347535	12394.4080917469	12809.0510793492	0.942730538732033	0.00161593830240374	0.939563299659321	0.945897777804744
1	Quarantine Only	1	2171.09061371104	35.8129408192163	2100.89724970537	2241.2839777167	7322.95677939922	76.3430166509849	7173.32446676329	7472.58909203515	9494.04739311026	91.3644687587141	9314.97303434318	9673.12175187734	0.799760763053345	0.00276188101572935	0.794347476262516	0.805174049844175
1	Quarantine Only	2	1305.03115600561	27.2519333398133	1251.61736665957	1358.44494535164	5081.29368580063	62.1044310576524	4959.56900092764	5203.01837067363	6386.32484180624	74.6501084994786	6240.01062914726	6532.63905446522	0.656882256825855	0.00328548342599763	0.6504427093109	0.663321804340811
1	Quarantine Only	3	564.28138476586	16.7439024257982	531.463336011295	597.099433520424	2844.5630323446	45.1473073007589	2756.07431003511	2933.05175465408	3408.84441711046	54.0167001254915	3302.97168486449	3514.71714935642	0.519554139225573	0.0035125473048365	0.512669546508093	0.526438731943053
1	Quarantine Only	4	157.667937423056	8.56119415774849	140.887996873869	174.447877972243	1093.51929190807	26.9499698029508	1040.69735109428	1146.34123272185	1251.18722933112	31.6960032699133	1189.06306292209	1313.31139574015	0.408498506293511	0.00342844971989231	0.401778744842522	0.4152182677445
1	Quarantine Only	5	33.709644108005	3.74893867397284	26.3617243070182	41.0575639089917	316.702553768226	12.9556778684937	291.309425145978	342.095682390473	350.412197876231	14.8986758315394	321.210793246414	379.613602506048	0.332424992464127	0.00325650210935067	0.3260422483298	0.338807736598455
1	Quarantine Only	6	6.56552837452249	1.58610469624849	3.45676316987545	9.67429357916953	77.638004235103	6.02748119376946	65.8241410953148	89.4518673748911	84.2035326096254	6.86177695866549	70.7544497706411	97.6526154486098	0.270641126648919	0.00310645902752994	0.264552466954961	0.276729786342878
1	Quarantine Only	7	1.2581472156686	0.689100652867982	-0.0924900639526469	2.60878449528984	17.3174685128857	2.74894081078555	11.929544523746	22.7053925020254	18.5756157285543	3.12192162884033	12.4566493360273	24.6945821210814	0.212443695894868	0.00281390664426413	0.20692843887211	0.217958952917626
1	Quarantine Only	8	0.255775963677346	0.314309903271848	-0.360271446735475	0.871823374090168	3.68485169491927	1.20950254720749	1.31422670239259	6.05547668744596	3.94062765859662	1.38256693861082	1.23079645891942	6.65045885827382	0.155041769914149	0.00243030819129318	0.150278365859214	0.159805173969083
1	Quarantine Only	9	0.0540946428931318	0.15001507032991	-0.239934894953492	0.348124180739756	0.786026816674141	0.564301845975166	-0.320004801437185	1.89205843478547	0.840121459567273	0.646580322531709	-0.427175972594876	2.10741889172942	0.0987230285603903	0.00197634464244389	0.0948493930612003	0.10259666405958
1	Quarantine Only	10	0.0106354055409534	0.0641830671792362	-0.11516340613035	0.136434217212256	0.167938508184162	0.269648101911699	-0.360571771562768	0.696448787931093	0.178573913725116	0.304240026406194	-0.417736538031024	0.774884365481255	0.0498146463653919	0.00144936588475667	0.0469738892312688	0.0526554034995149
1	Quarantine Only	11	0.0027918675739774	0.0330498906237728	-0.0619859180486174	0.0675696531965722	0.0379262836674699	0.136583860335241	-0.229778082589603	0.305630649924543	0.0407181512414473	0.156360459023034	-0.265748348443699	0.347184650926593	0.0189570009130251	0.000914162357017912	0.01716524269327	0.0207487591327802
1	Quarantine Only	12	0.000804823384421913	0.0130795042942506	-0.0248310050323093	0.0264406518011531	0.00970528293266385	0.0754251441795088	-0.138127999659173	0.157538565524501	0.0105101063170858	0.0849984313059712	-0.156086819042618	0.177107031676789	0.00563885754611655	0.000503803564688733	0.00465140255932664	0.00662631253290647
1	Quarantine Only	13	0.000378374156206843	0.00870033917942141	-0.0166742906354591	0.0174310389478728	0.00324407446111382	0.0474959454443346	-0.089847978609782	0.0963361275320096	0.00362244861732066	0.053202759570498	-0.100654960140856	0.107899857375497	0.001403411525144	0.000250327092069198	0.000912770424688375	0.00189405262559963
1	Quarantine Only	14	0	0	0	0	0.000901820396611912	0.0250461285456906	-0.0481885915529416	0.0499922323461655	0.000901820396611912	0.0250461285456906	-0.0481885915529416	0.0499922323461655	0.000319658952104276	0.000120372501122862	8.3728849903467e-05	0.000555589054305085
1	Quarantine Only	15	0	0	0	0	0.000163939339494075	0.00466558724112061	-0.00898061165310233	0.00930849033209048	0.000163939339494075	0.00466558724112061	-0.00898061165310233	0.00930849033209048	6.82846693870248e-05	5.56404839487139e-05	-4.07706791524544e-05	0.000177340017926504
1	Quarantine Only	16	0	0	0	0	1.69687470186592e-05	0.000447407151766536	-0.000859949270443751	0.00089388676448107	1.69687470186592e-05	0.000447407151766536	-0.000859949270443751	0.00089388676448107	1.57375758899315e-05	2.66147149623683e-05	-3.64272654363103e-05	6.79024172161734e-05
1	Quarantine Only	17	0	0	0	0	1.81645520880937e-06	3.89644762400128e-05	-7.45539182216157e-05	7.81868286392345e-05	1.81645520880937e-06	3.89644762400128e-05	-7.45539182216157e-05	7.81868286392345e-05	3.10218882016922e-06	1.17718458288531e-05	-1.99706290043828e-05	2.61750066447212e-05
1	Quarantine Only	18	0	0	0	0	2.79288507030399e-07	4.31809795317653e-06	-8.18418348119561e-06	8.74276049525641e-06	2.79288507030399e-07	4.31809795317653e-06	-8.18418348119561e-06	8.74276049525641e-06	8.11602609539873e-07	6.17487507162173e-06	-1.12911525308387e-05	1.29143577499185e-05
1	Quarantine Only	19	0	0	0	0	7.31742457963626e-08	1.30089326114214e-06	-2.47657654604222e-06	2.62292503763495e-06	7.31742457963626e-08	1.30089326114214e-06	-2.47657654604222e-06	2.62292503763495e-06	3.34199024813402e-07	3.982494421802e-06	-7.47149004191851e-06	8.13988809154532e-06
1	Quarantine Only	20	0	0	0	0	2.53157323747344e-08	5.65636564593785e-07	-1.08333193422908e-06	1.13396339897855e-06	2.53157323747344e-08	5.65636564593785e-07	-1.08333193422908e-06	1.13396339897855e-06	1.42740033561333e-07	2.60348180444044e-06	-4.96008430314193e-06	5.24556437026459e-06
1	Quarantine Only	21	0	0	0	0	9.94381415471114e-09	2.42687948064955e-07	-4.65724564052601e-07	4.85612192362024e-07	9.94381415471114e-09	2.42687948064955e-07	-4.65724564052601e-07	4.85612192362024e-07	9.48610715772284e-08	2.12009794524896e-06	-4.06053090111073e-06	4.25025304426519e-06
2	PreTest, EntryTest, PCR 0D	0	1077.50752547889	26.7655180510294	1025.04711009887	1129.96794085891	2803.58542895075	49.0698401878045	2707.40854218265	2899.76231571885	3881.09295442964	61.3140425810043	3760.91743097087	4001.26847788841	0.240198129473613	0.00294004093062727	0.234435649249583	0.245960609697642
2	PreTest, EntryTest, PCR 0D	1	1060.39065852871	26.7275259063591	1008.00470775224	1112.77660930517	2802.97782279561	49.067746312185	2706.80504002373	2899.1506055675	3863.36848132432	61.4150371239158	3742.99500856145	3983.7419540872	0.206163155571877	0.00279846908134352	0.200678156172444	0.211648154971311
2	PreTest, EntryTest, PCR 0D	2	845.667936968354	22.7346528815589	801.108017320498	890.227856616209	2732.40174929801	48.2884300634684	2637.75642637361	2827.0470722224	3578.06968626636	59.4274955081307	3461.59179507042	3694.5475774623	0.176630824602045	0.00265142209638947	0.171434037293122	0.181827611910968
2	PreTest, EntryTest, PCR 0D	3	424.723514713851	14.5979905236659	396.111453287466	453.335576140236	1927.66494385342	39.7633148944212	1849.72884666035	2005.60104104648	2352.38845856727	47.5772857862437	2259.13697842623	2445.6399387083	0.131522918808492	0.00237471283531431	0.126868481651276	0.136177355965708
2	PreTest, EntryTest, PCR 0D	4	123.970846216255	7.48875659583254	109.292883288423	138.648809144086	808.62083251526	23.536408540855	762.489471775184	854.752193255335	932.591678731514	27.5625766604289	878.569028477074	986.614328985955	0.0911914210811855	0.00200790515372997	0.0872559269798748	0.0951269151824963
2	PreTest, EntryTest, PCR 0D	5	26.5391120067015	3.2625620236908	20.1444904402675	32.9337335731355	241.513449766486	11.4435587569139	219.084074602934	263.942824930037	268.052561773187	13.1133303475905	242.35043429191	293.754689254464	0.0761076338970277	0.00183919822360816	0.0725028053787557	0.0797124624152997
2	PreTest, EntryTest, PCR 0D	6	5.10085547336824	1.41341296994445	2.33056605227713	7.87114489445935	59.7189902561935	5.33658938247852	49.2592750665356	70.1787054458514	64.8198457295617	6.12089536541746	52.8228908133435	76.81680064578	0.0724744847185755	0.00179683769154564	0.0689526828431461	0.075996286594005
2	PreTest, EntryTest, PCR 0D	7	0.958405716665381	0.606783010186946	-0.230888983301034	2.1477004166318	13.2799456393365	2.35956565128219	8.65519696282344	17.9046943158496	14.2383513560019	2.67940999737854	8.98670776113998	19.4899949508639	0.0716055765105461	0.00177876604654487	0.0681191950593182	0.0750919579617741
2	PreTest, EntryTest, PCR 0D	8	0.184785717576686	0.271677234141148	-0.347701661339964	0.717273096493337	2.79594128198409	1.04095158685474	0.755676171748795	4.83620639221939	2.98072699956078	1.1862111372658	0.655753170519813	5.30570082860174	0.0690486200799775	0.00175430123982334	0.0656101896499237	0.0724870505100312
2	PreTest, EntryTest, PCR 0D	9	0.0375368337068465	0.12250810086067	-0.202579043980067	0.277652711393759	0.596868577726234	0.487058731213827	-0.357766535452867	1.55150369090534	0.634405411433081	0.551338169654205	-0.446217401089162	1.71502822395532	0.0564822347863086	0.00156561738587351	0.0534136247099965	0.0595508448626207
2	PreTest, EntryTest, PCR 0D	10	0.00747461864261605	0.0543044012669437	-0.0989620078405935	0.113911245125826	0.127944920801487	0.239292586639502	-0.341068549011937	0.59695839061491	0.135419539444103	0.268501254349353	-0.39084291908063	0.661681997968835	0.0334184491371909	0.00123030735172233	0.0310070467278152	0.0358298515465667
2	PreTest, EntryTest, PCR 0D	11	0.00208070726231867	0.0311294097614696	-0.0589329358701617	0.063094350394799	0.0296516523622842	0.127205397289527	-0.219670926325188	0.278974231049756	0.0317323596246029	0.144993017468096	-0.252453954612865	0.315918673862071	0.0137941896254236	0.000779374495471978	0.0122666156142985	0.0153217636365486
2	PreTest, EntryTest, PCR 0D	12	0.000804823384421913	0.0130795042942506	-0.0248310050323093	0.0264406518011531	0.00877304269378315	0.0751693876383878	-0.138558957077457	0.156105042465023	0.00957786607820506	0.0847769549737241	-0.156584965670294	0.175740697826704	0.00424597428713778	0.000444157443519687	0.0033754256978392	0.00511652287643637
2	PreTest, EntryTest, PCR 0D	13	0.000378374156206843	0.00870033917942141	-0.0166742906354591	0.0174310389478728	0.00310190341985899	0.0474910156934358	-0.0899804873392752	0.0961842941789932	0.00348027757606584	0.0531988922571467	-0.100789551247942	0.107750106400073	0.00107143088241627	0.000216007953015267	0.00064805529450635	0.0014948064703262
2	PreTest, EntryTest, PCR 0D	14	0	0	0	0	0.000878191448946985	0.0250458717786575	-0.0482117172372217	0.0499681001351157	0.000878191448946985	0.0250458717786575	-0.0482117172372217	0.0499681001351157	0.000243527824633003	0.000105015992785022	3.76964787743597e-05	0.000449359170491646
2	PreTest, EntryTest, PCR 0D	15	0	0	0	0	0.000159280767216726	0.00466540044191783	-0.00898490409894223	0.00930346563337568	0.000159280767216726	0.00466540044191783	-0.00898490409894223	0.00930346563337568	5.09285310528725e-05	4.75173462766073e-05	-4.22054676492779e-05	0.000144062529755023
2	PreTest, EntryTest, PCR 0D	16	0	0	0	0	1.57982609648831e-05	0.000447167071932536	-0.000860649200022887	0.000892245721952653	1.57982609648831e-05	0.000447167071932536	-0.000860649200022887	0.000892245721952653	1.14454937541176e-05	2.29037096094092e-05	-3.34457770803245e-05	5.63367645885597e-05
2	PreTest, EntryTest, PCR 0D	17	0	0	0	0	1.45050125297514e-06	3.8494250133223e-05	-7.3998229008142e-05	7.68992315140923e-05	1.45050125297514e-06	3.8494250133223e-05	-7.3998229008142e-05	7.68992315140923e-05	1.72049990161503e-06	8.90774427735824e-06	-1.57386788820071e-05	1.91796786852372e-05
2	PreTest, EntryTest, PCR 0D	18	0	0	0	0	1.47495016527754e-07	3.31758374219703e-06	-6.35496911817843e-06	6.64995915123394e-06	1.47495016527754e-07	3.31758374219703e-06	-6.35496911817843e-06	6.64995915123394e-06	4.78939560889109e-07	4.76790508760802e-06	-8.86615441082261e-06	9.82403353260083e-06
2	PreTest, EntryTest, PCR 0D	19	0	0	0	0	1.88790921741312e-08	3.39162053928532e-07	-6.45878533525792e-07	6.83636717874054e-07	1.88790921741312e-08	3.39162053928532e-07	-6.45878533525792e-07	6.83636717874054e-07	1.91240218639473e-07	3.01925859589857e-06	-5.72650662932172e-06	6.10898706660066e-06
2	PreTest, EntryTest, PCR 0D	20	0	0	0	0	1.91843937708625e-09	6.0666379845472e-08	-1.16987665120039e-07	1.20824543874211e-07	1.91843937708625e-09	6.0666379845472e-08	-1.16987665120039e-07	1.20824543874211e-07	4.78789619841042e-08	1.51406571874384e-06	-2.91968984675382e-06	3.01544777072203e-06
2	PreTest, EntryTest, PCR 0D	21	0	0	0	0	0	0	0	0	0	0	0	0	0	0	0	0
3	PreTest, EntryTest, Antigen	0	1208.79356677019	28.1204915763827	1153.67740328048	1263.9097302599	3148.42244767314	51.0294034946172	3048.40481682369	3248.44007852259	4357.21601444333	63.7155353862864	4232.33356508621	4482.09846380045	0.277579642260142	0.00308627688919616	0.271530539557318	0.283628744962967
3	PreTest, EntryTest, Antigen	1	1186.42325686556	27.8623929383955	1131.81296670631	1241.03354702482	3147.72317415578	51.0318330710917	3047.70078133644	3247.74556697512	4334.14643102135	63.809449325725	4209.07991034293	4459.21295169977	0.236984057578618	0.00291002019098091	0.231280418004295	0.24268769715294
3	PreTest, EntryTest, Antigen	2	935.087191950301	23.8053593296119	888.428687664262	981.74569623634	3055.58593236914	50.274547740502	2957.04781879776	3154.12404594053	3990.67312431944	61.6392970184072	3869.86010216336	4111.48614647552	0.199767737763379	0.00274592460513787	0.194385725537309	0.205149749989449
3	PreTest, EntryTest, Antigen	3	463.06461780052	15.1712233111477	433.329020110671	492.80021549037	2119.55810882558	40.4986182947405	2040.18081696789	2198.93540068328	2582.6227266261	48.3592095153311	2487.83867597605	2677.40677727615	0.146590154201386	0.00245409804677783	0.141780122029701	0.15140018637307
3	PreTest, EntryTest, Antigen	4	134.677139993834	7.85512052803533	119.281103758884	150.073176228783	882.809002081185	24.5540952312798	834.682975427877	930.935028734494	1017.48614207502	28.8239060730648	960.991286171812	1073.98099797823	0.101835342206338	0.00212157408904193	0.0976770569918163	0.105993627420861
3	PreTest, EntryTest, Antigen	5	28.9610444521536	3.47060041997458	22.1586676290034	35.7634212753038	263.44712236534	11.9513038948472	240.02256673144	286.871677999241	292.408166817494	13.7650525082684	265.428663901288	319.3876697337	0.0853494628786232	0.00195558191654229	0.0815165223222003	0.0891824034350461
3	PreTest, EntryTest, Antigen	6	5.58849031286705	1.49109607315548	2.6659420094823	8.5110386162518	65.2215286168516	5.51990298844526	54.4025187594989	76.0405384742043	70.8100189297186	6.33455472971925	58.3942916594689	83.2257461999683	0.0813763588184992	0.0019212983475283	0.0776106140573438	0.0851421035796547
3	PreTest, EntryTest, Antigen	7	1.05992301439146	0.643011805903972	-0.200380125180326	2.32022615396324	14.5495363509004	2.43220436485978	9.78241579577523	19.3166569060256	15.6094593652919	2.76051464937334	10.1988506525201	21.0200680780636	0.0803995603027744	0.00190342747088416	0.0766688424598414	0.0841302781457073
3	PreTest, EntryTest, Antigen	8	0.209917595570196	0.292947122653305	-0.364258764830282	0.784093955970674	3.08295500599105	1.08636298393466	0.953683557479119	5.21222645450297	3.29287260156124	1.2480126672983	0.846767773656574	5.73897742946591	0.0772867520559355	0.00186205769510628	0.0736371189735272	0.0809363851383438
3	PreTest, EntryTest, Antigen	9	0.0426366601147691	0.131106373039498	-0.214331831042646	0.299605151272185	0.658424437491057	0.504355295119497	-0.330111940943156	1.64696081592527	0.701061097605827	0.575089113004976	-0.426113563883926	1.82823575909558	0.0626199267407687	0.00165851850954235	0.0593692304620657	0.0658706230194717
3	PreTest, EntryTest, Antigen	10	0.00920701679803743	0.0623015657828634	-0.112904052136375	0.13131808573245	0.140931209978733	0.24690173056639	-0.342996181931392	0.624858601888858	0.15013822677677	0.280515831396327	-0.399672802760031	0.699949256313572	0.0366687846526872	0.00130396560358218	0.0341130120696662	0.0392245572357083
3	PreTest, EntryTest, Antigen	11	0.00225223947027102	0.0315871638377003	-0.0596586016516215	0.0641630805921635	0.0319260722033413	0.128949924154317	-0.22081577913912	0.284667923545802	0.0341783116736123	0.147287694952036	-0.254505570432379	0.322862193779603	0.0150463147967927	0.000819925151248456	0.0134392615003458	0.0166533680932397
3	PreTest, EntryTest, Antigen	12	0.000804823384421913	0.0130795042942506	-0.0248310050323093	0.0264406518011531	0.0090222746923435	0.0751803607982318	-0.138331232472191	0.156375781856878	0.00982709807676541	0.0847849408502306	-0.156351385989687	0.176005582143217	0.0046225129695975	0.000460348083622298	0.0037202307256978	0.0055247952134972
3	PreTest, EntryTest, Antigen	13	0.000378374156206843	0.00870033917942141	-0.0166742906354591	0.0174310389478728	0.0031385646038902	0.0474917023361875	-0.0899451719750373	0.0962223011828177	0.00351693876009704	0.0531992918550907	-0.100753673275881	0.107787550796075	0.00116662697293502	0.000228971652589322	0.000717842533859946	0.00161541141201009
3	PreTest, EntryTest, Antigen	14	0	0	0	0	0.000883654832953193	0.0250463370070267	-0.0482071657008191	0.0499744753667255	0.000883654832953193	0.0250463370070267	-0.0482071657008191	0.0499744753667255	0.000265840050352006	0.000111070159842399	4.81425370609044e-05	0.000483537563643107
3	PreTest, EntryTest, Antigen	15	0	0	0	0	0.000160108615187378	0.00466557383026305	-0.0089844160921282	0.00930463332250295	0.000160108615187378	0.00466557383026305	-0.0089844160921282	0.00930463332250295	5.58905105168121e-05	4.9888232741597e-05	-4.1890425656718e-05	0.000153671446690342
3	PreTest, EntryTest, Antigen	16	0	0	0	0	1.59314909073127e-05	0.000447226494974059	-0.000860632439241843	0.000892495421056468	1.59314909073127e-05	0.000447226494974059	-0.000860632439241843	0.000892495421056468	1.26864840431177e-05	2.38242213339952e-05	-3.40089897715129e-05	5.93819578577483e-05
3	PreTest, EntryTest, Antigen	17	0	0	0	0	1.47079258483831e-06	3.84941419263662e-05	-7.39777255908394e-05	7.6919310760516e-05	1.47079258483831e-06	3.84941419263662e-05	-7.39777255908394e-05	7.6919310760516e-05	2.15015164084485e-06	9.91038380355892e-06	-1.72742006141306e-05	2.15745038958203e-05
3	PreTest, EntryTest, Antigen	18	0	0	0	0	1.47495016527754e-07	3.31758374219703e-06	-6.35496911817843e-06	6.64995915123394e-06	1.47495016527754e-07	3.31758374219703e-06	-6.35496911817843e-06	6.64995915123394e-06	4.78939560889109e-07	4.76790508760802e-06	-8.86615441082261e-06	9.82403353260083e-06
3	PreTest, EntryTest, Antigen	19	0	0	0	0	1.88790921741312e-08	3.39162053928532e-07	-6.45878533525792e-07	6.83636717874054e-07	1.88790921741312e-08	3.39162053928532e-07	-6.45878533525792e-07	6.83636717874054e-07	1.91240218639473e-07	3.01925859589857e-06	-5.72650662932172e-06	6.10898706660066e-06
3	PreTest, EntryTest, Antigen	20	0	0	0	0	1.91843937708625e-09	6.0666379845472e-08	-1.16987665120039e-07	1.20824543874211e-07	1.91843937708625e-09	6.0666379845472e-08	-1.16987665120039e-07	1.20824543874211e-07	4.78789619841042e-08	1.51406571874384e-06	-2.91968984675382e-06	3.01544777072203e-06
3	PreTest, EntryTest, Antigen	21	0	0	0	0	0	0	0	0	0	0	0	0	0	0	0	0
4	PreTest, EntryTest, PCR 1D	0	1349.77077117499	29.4867735909704	1291.97669493669	1407.5648474133	3517.96218569995	54.280137449293	3411.57311629934	3624.35125510056	4867.73295687494	66.6487994752236	4737.10130990351	4998.36460384638	0.264125646709069	0.00301179078932935	0.258222536761984	0.270028756656155
4	PreTest, EntryTest, PCR 1D	1	1294.11679680609	28.6746654752312	1237.91445247464	1350.31914113755	3515.40612876511	54.2214272961629	3409.13213126463	3621.68012626559	4809.5229255712	66.412389649345	4679.35464185849	4939.69120928392	0.238074904767803	0.00292750740686265	0.232336990250352	0.243812819285254
4	PreTest, EntryTest, PCR 1D	2	974.307546717526	24.2448846809277	926.787572742907	1021.82752069214	3288.49494336713	51.9767292276742	3186.62055408088	3390.36933265337	4262.80249008465	63.2098036465187	4138.91127493747	4386.69370523183	0.207409942304806	0.00283068469378868	0.20186180030498	0.212958084304632
4	PreTest, EntryTest, PCR 1D	3	465.118839102785	15.0358599991919	435.648553504369	494.589124701201	2174.90173251989	40.1480615267104	2096.21153192754	2253.59193311225	2640.02057162268	47.823248700135	2546.28700417041	2733.75413907494	0.154561291904545	0.00253070704098658	0.149601106104211	0.159521477704878
4	PreTest, EntryTest, PCR 1D	4	133.662473646711	7.81960685482627	118.336044211251	148.98890308217	888.056582828355	24.3806170748811	840.270573361588	935.842592295122	1021.71905647507	28.6661037264661	965.533493171192	1077.90461977894	0.110736413159948	0.00222528512320833	0.10637485431846	0.115097972001436
4	PreTest, EntryTest, PCR 1D	5	28.6876290288957	3.44821185359777	21.929133795844	35.4461242619473	262.959583148749	11.8754575427853	239.68368636489	286.235479932608	291.647212177645	13.6842748039842	264.826033561836	318.468390793454	0.0946914863509486	0.00205798912095971	0.0906578276738676	0.0987251450280296
4	PreTest, EntryTest, PCR 1D	6	5.55012109426099	1.47438650301298	2.66032354835556	8.43991864016643	64.9351538331607	5.49309060348656	54.168696250327	75.7016114159944	70.4852749274217	6.29989368748819	58.1374832999448	82.8330665548985	0.0908182724814805	0.00202631729351429	0.0868466905861925	0.0947898543767685
4	PreTest, EntryTest, PCR 1D	7	1.05329020717831	0.639248940078455	-0.19963771537546	2.30621812973208	14.4757615191365	2.42752839066934	9.71780587342461	19.2337171648484	15.5290517263148	2.75177838634507	10.1355660890785	20.9225373635512	0.0895587722157438	0.00200493531559079	0.0856290989971858	0.0934884454343017
4	PreTest, EntryTest, PCR 1D	8	0.207432979260792	0.288996128371753	-0.358999432347845	0.773865390869428	3.06633541307047	1.09086683078055	0.928236424740602	5.20443440140034	3.27376839233126	1.24842726290296	0.826850957041452	5.72068582762107	0.0844618702792969	0.00192739084305011	0.0806841842269187	0.0882395563316751
4	PreTest, EntryTest, PCR 1D	9	0.0424586798698866	0.13104324791925	-0.214386086051843	0.299303445791616	0.656247995662495	0.507890371404875	-0.33921713229106	1.65171312361605	0.698706675532382	0.57845391228254	-0.435062992541397	1.83247634360616	0.0661436491887169	0.00168860512954246	0.0628339831348137	0.0694533152426202
4	PreTest, EntryTest, PCR 1D	10	0.00920701679803743	0.0623015657828634	-0.112904052136375	0.13131808573245	0.140676262731256	0.24792091302193	-0.345248726791727	0.62660125225424	0.149883279529294	0.281417803874363	-0.401695616064458	0.701462175123045	0.0376310987835006	0.0012930317245129	0.0350967566034553	0.0401654409635459
4	PreTest, EntryTest, PCR 1D	11	0.00225223947027102	0.0315871638377003	-0.0596586016516215	0.0641630805921635	0.0318592758715946	0.129121218059204	-0.221218311524445	0.284936863267634	0.0341115153418656	0.147438763213893	-0.254868460557365	0.323091491241096	0.0151776647438964	0.000820504309142661	0.0135694762979768	0.016785853189816
4	PreTest, EntryTest, PCR 1D	12	0.000804823384421913	0.0130795042942506	-0.0248310050323093	0.0264406518011531	0.00900836415426453	0.0751826843818524	-0.138349697234166	0.156366425542695	0.00981318753868644	0.084787009723177	-0.15636935151874	0.175995726596113	0.00462529595397119	0.00045889267876127	0.0037258663035991	0.00552472560434327
4	PreTest, EntryTest, PCR 1D	13	0.000378374156206843	0.00870033917942141	-0.0166742906354591	0.0174310389478728	0.00313600522377566	0.0474902669789908	-0.0899449180550464	0.0962169285025977	0.00351437937998251	0.0531980275758849	-0.100753754668752	0.107782513428717	0.00116353201850392	0.000228825753119763	0.00071503354238918	0.00161203049461865
4	PreTest, EntryTest, PCR 1D	14	0	0	0	0	0.00088318786965584	0.0250457379150596	-0.0482064584438609	0.0499728341831726	0.00088318786965584	0.0250457379150596	-0.0482064584438609	0.0499728341831726	0.000264694079595277	0.000110123692493608	4.88516423078061e-05	0.000480536516882748
4	PreTest, EntryTest, PCR 1D	15	0	0	0	0	0.000160019429546524	0.00466537977073784	-0.00898412492109964	0.00930416378019269	0.000160019429546524	0.00466537977073784	-0.00898412492109964	0.00930416378019269	5.5602332486182e-05	4.98826701491522e-05	-4.21677010061563e-05	0.00015337236597852
4	PreTest, EntryTest, PCR 1D	16	0	0	0	0	1.59077745735516e-05	0.000447164207078419	-0.00086053407130015	0.000892349620447253	1.59077745735516e-05	0.000447164207078419	-0.00086053407130015	0.000892349620447253	1.24949102483101e-05	2.36359529358441e-05	-3.38315575059444e-05	5.88213780025646e-05
4	PreTest, EntryTest, PCR 1D	17	0	0	0	0	1.46536472305816e-06	3.8494134563521e-05	-7.3983139021443e-05	7.69138684675593e-05	1.46536472305816e-06	3.8494134563521e-05	-7.3983139021443e-05	7.69138684675593e-05	2.05352319999485e-06	9.69280007449039e-06	-1.69443649460063e-05	2.1051411345996e-05
4	PreTest, EntryTest, PCR 1D	18	0	0	0	0	1.47495016527754e-07	3.31758374219703e-06	-6.35496911817843e-06	6.64995915123394e-06	1.47495016527754e-07	3.31758374219703e-06	-6.35496911817843e-06	6.64995915123394e-06	4.78939560889109e-07	4.76790508760802e-06	-8.86615441082261e-06	9.82403353260083e-06
4	PreTest, EntryTest, PCR 1D	19	0	0	0	0	1.88790921741312e-08	3.39162053928532e-07	-6.45878533525792e-07	6.83636717874054e-07	1.88790921741312e-08	3.39162053928532e-07	-6.45878533525792e-07	6.83636717874054e-07	1.91240218639473e-07	3.01925859589857e-06	-5.72650662932172e-06	6.10898706660066e-06
4	PreTest, EntryTest, PCR 1D	20	0	0	0	0	1.91843937708625e-09	6.0666379845472e-08	-1.16987665120039e-07	1.20824543874211e-07	1.91843937708625e-09	6.0666379845472e-08	-1.16987665120039e-07	1.20824543874211e-07	4.78789619841042e-08	1.51406571874384e-06	-2.91968984675382e-06	3.01544777072203e-06
4	PreTest, EntryTest, PCR 1D	21	0	0	0	0	0	0	0	0	0	0	0	0	0	0	0	0
5	PreTest, EntryTest, PCR 2D	0	1460.18945071193	31.4195034219361	1398.60722400494	1521.77167741892	3814.81608887705	56.691209185817	3703.70131887285	3925.93085888126	5275.00553958898	70.2018081613593	5137.40999559272	5412.60108358525	0.265709016279262	0.00294206215293538	0.259942574459509	0.271475458099015
5	PreTest, EntryTest, PCR 2D	1	1391.16920127848	30.3990594520162	1331.58704475253	1450.75135780443	3805.92964074538	56.580643798881	3695.03157889957	3916.82770259118	5197.09884202386	69.6867625043799	5060.51278751528	5333.68489653245	0.248458620888791	0.0028992409782684	0.242776108571385	0.254141133206198
5	PreTest, EntryTest, PCR 2D	2	1041.36891174039	24.9086241056605	992.548008493299	1090.18981498749	3528.54265226122	53.7479706029048	3423.19662987952	3633.88867464291	4569.91156400161	65.483030306556	4441.56482460076	4698.25830340246	0.220462153064011	0.00282527737713086	0.214924609404835	0.225999696723188
5	PreTest, EntryTest, PCR 2D	3	496.886804497111	15.9650181861474	465.595368852262	528.17824014196	2326.43495944331	41.8061808337164	2244.49484500923	2408.3750738774	2823.32176394042	50.1983408937321	2724.93301578871	2921.71051209214	0.165945053212788	0.00260872173017	0.160831958621655	0.171058147803921
5	PreTest, EntryTest, PCR 2D	4	142.890499187634	8.19762696020712	126.823150345628	158.95784802964	950.045826613473	25.6580983259247	899.755953894661	1000.33569933229	1092.93632580111	30.1367951858898	1033.86820723676	1152.00444436545	0.119725219734717	0.00226801939344208	0.11527990172357	0.124170537745863
5	PreTest, EntryTest, PCR 2D	5	30.6942763369531	3.61462443992884	23.6096124346926	37.7789402392137	281.59203103359	12.5986433799965	256.898690008797	306.285372058384	312.286307370544	14.4572977678998	283.95000374546	340.622610995627	0.102690903643249	0.00210215985559621	0.0985706703262809	0.106811136960218
5	PreTest, EntryTest, PCR 2D	6	5.9639791256818	1.49878499281801	3.02636053975851	8.9015977116051	69.6394355449386	5.75669766008492	58.3563081311722	80.9225629587051	75.6034146706204	6.54653080610025	62.772214290664	88.434615050577	0.0985193850114176	0.00204847927915685	0.0945043656242702	0.102534404398565
5	PreTest, EntryTest, PCR 2D	7	1.13772324774815	0.657913239279408	-0.151786701239486	2.42723319673579	15.5880143510688	2.57869027640597	10.5337814093131	20.6422472928245	16.7257375988169	2.93231920165943	10.9783919635645	22.4730832340694	0.0969624297367592	0.00202895547894215	0.0929856769980326	0.100939182475486
5	PreTest, EntryTest, PCR 2D	8	0.228517012546395	0.298948495903912	-0.357422039425272	0.814456064518062	3.31329816057354	1.12521649173744	1.10787383676815	5.51872248437892	3.54181517311993	1.29092336812174	1.01160537160132	6.07202497463855	0.0909483604038939	0.00196522926426182	0.0870965110459408	0.0948002097618471
5	PreTest, EntryTest, PCR 2D	9	0.0472879341617071	0.135282089041478	-0.217864960359589	0.312440828683004	0.704853545497071	0.525050663014659	-0.32424575401166	1.7339528450058	0.752141479658778	0.59923329480601	-0.422355778161001	1.92663873747856	0.0708155754442473	0.00173144768828788	0.0674219379752031	0.0742092129132916
5	PreTest, EntryTest, PCR 2D	10	0.00932309336943664	0.0611755765917528	-0.110581036750399	0.129227223489272	0.150167638524609	0.247619833841961	-0.335167235805634	0.635502512854852	0.159490731894046	0.278463607440003	-0.386297938688361	0.705279402476452	0.0402190693786893	0.00134897515758182	0.037575078069829	0.0428630606875497
5	PreTest, EntryTest, PCR 2D	11	0.00217549766618411	0.0292613648383016	-0.0551767774168869	0.0595277727492552	0.0329097852147895	0.1186212082633	-0.199587782981278	0.265407353410857	0.0350852828809736	0.133189728870157	-0.225966585704535	0.296137151466482	0.0162137092315943	0.000855934432566553	0.0145360777437639	0.0178913407194248
5	PreTest, EntryTest, PCR 2D	12	0.000569920489063393	0.0107778514696335	-0.0205546683914182	0.021694509369545	0.0082026365276753	0.0668806615811139	-0.122883460171308	0.139288733226659	0.0087725570167387	0.0737847868408436	-0.135845625191315	0.153390739224792	0.00495090500211132	0.000476098381828908	0.00401775217372666	0.00588405783049598
5	PreTest, EntryTest, PCR 2D	13	0.000143471260848324	0.00453695963056844	-0.00874896961506583	0.00903591213676247	0.00250350450271635	0.0422957609265489	-0.0803961869133194	0.0854031959187521	0.00264697576356467	0.0445847538298693	-0.0847391417429792	0.0900330932701086	0.00124652787227155	0.000236013351588773	0.000783941703157559	0.00170911404138555
5	PreTest, EntryTest, PCR 2D	14	0	0	0	0	0.000894351971272005	0.0250462144615458	-0.0481962283733577	0.0499849323159018	0.000894351971272005	0.0250462144615458	-0.0481962283733577	0.0499849323159018	0.000283469620746815	0.000113777163556151	6.04663801767585e-05	0.000506472861316872
5	PreTest, EntryTest, PCR 2D	15	0	0	0	0	0.000162927652348354	0.00466560781185413	-0.00898166365888575	0.00930751896358246	0.000162927652348354	0.00466560781185413	-0.00898166365888575	0.00930751896358246	6.0174474169555e-05	5.33315264701396e-05	-4.43553177119186e-05	0.000164704266051029
5	PreTest, EntryTest, PCR 2D	16	0	0	0	0	1.6839590462628e-05	0.000447410151732781	-0.000860084306933622	0.000893763487858878	1.6839590462628e-05	0.000447410151732781	-0.000860084306933622	0.000893763487858878	1.40208806476645e-05	2.50506953175136e-05	-3.50784821746621e-05	6.31202434699911e-05
5	PreTest, EntryTest, PCR 2D	17	0	0	0	0	1.80503308273246e-06	3.89646303979465e-05	-7.45656424972426e-05	7.81757086627075e-05	1.80503308273246e-06	3.89646303979465e-05	-7.45656424972426e-05	7.81757086627075e-05	2.86338569003152e-06	1.13395471139053e-05	-1.93621266532229e-05	2.5088898033286e-05
5	PreTest, EntryTest, PCR 2D	18	0	0	0	0	2.79288507030399e-07	4.31809795317653e-06	-8.18418348119561e-06	8.74276049525641e-06	2.79288507030399e-07	4.31809795317653e-06	-8.18418348119561e-06	8.74276049525641e-06	8.11602609539873e-07	6.17487507162173e-06	-1.12911525308387e-05	1.29143577499185e-05
5	PreTest, EntryTest, PCR 2D	19	0	0	0	0	7.31742457963626e-08	1.30089326114214e-06	-2.47657654604222e-06	2.62292503763495e-06	7.31742457963626e-08	1.30089326114214e-06	-2.47657654604222e-06	2.62292503763495e-06	3.34199024813402e-07	3.982494421802e-06	-7.47149004191851e-06	8.13988809154532e-06
5	PreTest, EntryTest, PCR 2D	20	0	0	0	0	2.53157323747344e-08	5.65636564593785e-07	-1.08333193422908e-06	1.13396339897855e-06	2.53157323747344e-08	5.65636564593785e-07	-1.08333193422908e-06	1.13396339897855e-06	1.42740033561333e-07	2.60348180444044e-06	-4.96008430314193e-06	5.24556437026459e-06
5	PreTest, EntryTest, PCR 2D	21	0	0	0	0	9.94381415471114e-09	2.42687948064955e-07	-4.65724564052601e-07	4.85612192362024e-07	9.94381415471114e-09	2.42687948064955e-07	-4.65724564052601e-07	4.85612192362024e-07	9.48610715772284e-08	2.12009794524896e-06	-4.06053090111073e-06	4.25025304426519e-06
6	PreTest, EntryTest, ExitTest, PCR 0D	0	1077.50752547889	26.7655180510294	1025.04711009887	1129.96794085891	2803.58542895075	49.0698401878045	2707.40854218265	2899.76231571885	3881.09295442964	61.3140425810043	3760.91743097087	4001.26847788841	0.240198129473613	0.00294004093062727	0.234435649249583	0.245960609697642
6	PreTest, EntryTest, ExitTest, PCR 0D	1	423.806867012971	16.8136063030538	390.852198658986	456.761535366957	1112.92266310008	31.6044807704931	1050.97788078992	1174.86744541025	1536.72953011305	40.0784909401784	1458.17568787031	1615.2833723558	0.0886983897999585	0.00199965533399891	0.0847790653453206	0.0926177142545963
6	PreTest, EntryTest, ExitTest, PCR 0D	2	91.8724660397377	7.86730404815854	76.452550105347	107.292381974128	256.568173858109	14.706400952746	227.743627990727	285.392719725491	348.440639897847	18.2098474875718	312.749338822206	384.131940973488	0.0227071964140651	0.000990502233276868	0.0207658120368425	0.0246485807912878
6	PreTest, EntryTest, ExitTest, PCR 0D	3	15.3002397042766	3.00083901715337	9.418595230656	21.1818841778972	51.5862505289499	6.84042075097861	38.1790258570318	64.9934752008679	66.8864902332265	8.3347688740394	50.5503432401092	83.2226372263437	0.00525196336091046	0.000489794517148593	0.00429196610729922	0.00621196061452171
6	PreTest, EntryTest, ExitTest, PCR 0D	4	2.57175360513008	1.2173079452017	0.185830032534745	4.95767717772542	14.0388910514509	3.02475452966955	8.11037217329854	19.9674099296032	16.6106446565809	3.59936555513637	9.55588816851365	23.6654011446482	0.00269965894265227	0.000347938295236759	0.00201769988398822	0.00338161800131631
6	PreTest, EntryTest, ExitTest, PCR 0D	5	0.432203107398738	0.461508186240021	-0.472352937631703	1.33675915242918	4.66826994416996	1.45805441254483	1.81048329558209	7.52605659275783	5.1004730515687	1.66697228107691	1.83320738065796	8.36773872247944	0.00438724176923318	0.000450914903571594	0.00350344855823286	0.0052710349802335
6	PreTest, EntryTest, ExitTest, PCR 0D	6	0.0743773081990648	0.187855031020382	-0.293818552600883	0.442573168999013	1.53082247878346	0.624739283797428	0.306333482540497	2.75531147502642	1.60519978698252	0.707496531475195	0.218506585291138	2.9918929886739	0.00920774750814081	0.000655349529149734	0.00792326243100733	0.0104922325852743
6	PreTest, EntryTest, ExitTest, PCR 0D	7	0.0189274572212684	0.0950165526639309	-0.167304986000036	0.205159900442573	0.501732432273654	0.289865829475864	-0.0664045934990387	1.06986945804635	0.520659889494922	0.339525800653964	-0.144810679786848	1.18613045877669	0.0178345495235376	0.000916977824899876	0.0160372729867338	0.0196318260603413
6	PreTest, EntryTest, ExitTest, PCR 0D	8	0.000634195823531993	0.010544321549927	-0.0200326744143249	0.0213010660613889	0.150648966679767	0.128947536592849	-0.102088205042217	0.403386138401752	0.151283162503299	0.133043336469784	-0.109481776977478	0.412048101984077	0.0278814387974385	0.00114485654247709	0.0256375199741834	0.0301253576206936
6	PreTest, EntryTest, ExitTest, PCR 0D	9	0.000163943589325219	0.0051843515005096	-0.0099973853516736	0.010325272530324	0.0442741001570577	0.0717397540143594	-0.0963358177110866	0.184884018025202	0.044438043746383	0.0746017352655093	-0.101781357374015	0.190657444866781	0.030205640500394	0.00118304788340456	0.027886866648921	0.0325244143518669
6	PreTest, EntryTest, ExitTest, PCR 0D	10	0	0	0	0	0.0103271814422191	0.0060291186722303	-0.0014898911553523	0.0221442540397905	0.0103271814422191	0.0060291186722303	-0.0014898911553523	0.0221442540397905	0.0204830806992896	0.000983256836503984	0.0185558972997418	0.0224102640988374
6	PreTest, EntryTest, ExitTest, PCR 0D	11	9.82213900606606e-05	0.00310603307539512	-0.00598960343771377	0.00618604621783509	0.00308590004970361	0.0191883291362842	-0.0345232250574135	0.0406950251568207	0.00318412143976427	0.0222739870382678	-0.0404728931552406	0.0468411360347692	0.00903455909582936	0.000655595666800658	0.00774959158890007	0.0103195266027586
6	PreTest, EntryTest, ExitTest, PCR 0D	12	0	0	0	0	0.000537547575564371	0.000606490306695376	-0.000651173425558565	0.00172626857668731	0.000537547575564371	0.000606490306695376	-0.000651173425558565	0.00172626857668731	0.00287738076098311	0.000370046535731935	0.00215208955094852	0.0036026719710177
6	PreTest, EntryTest, ExitTest, PCR 0D	13	0	0	0	0	0.00012729769995875	0.000396033553630927	-0.000648928065157866	0.000903523465075366	0.00012729769995875	0.000396033553630927	-0.000648928065157866	0.000903523465075366	0.000744225112462632	0.000184208388555509	0.000383176670893835	0.00110527355403143
6	PreTest, EntryTest, ExitTest, PCR 0D	14	0	0	0	0	2.48010149035194e-05	9.56952421562398e-05	-0.000162761659722711	0.000212363689529749	2.48010149035194e-05	9.56952421562398e-05	-0.000162761659722711	0.000212363689529749	0.000171574989057225	8.96865288286097e-05	-4.21060744684994e-06	0.0003473605855613
6	PreTest, EntryTest, ExitTest, PCR 0D	15	0	0	0	0	4.16027390161208e-06	1.86336883733883e-05	-3.23617553102291e-05	4.06823031134532e-05	4.16027390161208e-06	1.86336883733883e-05	-3.23617553102291e-05	4.06823031134532e-05	3.46659957037614e-05	4.01576580304521e-05	-4.40430140359247e-05	0.000113375005443448
6	PreTest, EntryTest, ExitTest, PCR 0D	16	0	0	0	0	8.38757496154369e-07	3.85542218187987e-06	-6.71786998033017e-06	8.39538497263891e-06	8.38757496154369e-07	3.85542218187987e-06	-6.71786998033017e-06	8.39538497263891e-06	8.5341432346113e-06	1.97200789799388e-05	-3.01172115660688e-05	4.71854980352913e-05
6	PreTest, EntryTest, ExitTest, PCR 0D	17	0	0	0	0	1.48102349832853e-07	2.07127064081209e-06	-3.91158810615883e-06	4.20779280582454e-06	1.48102349832853e-07	2.07127064081209e-06	-3.91158810615883e-06	4.20779280582454e-06	1.24233400404469e-06	7.60772741272247e-06	-1.36688117248913e-05	1.61534797329807e-05
6	PreTest, EntryTest, ExitTest, PCR 0D	18	0	0	0	0	2.55654595024497e-08	4.30092732995846e-07	-8.17416297169409e-07	8.68547216174309e-07	2.55654595024497e-08	4.30092732995846e-07	-8.17416297169409e-07	8.68547216174309e-07	2.88027449206214e-07	3.70923464886717e-06	-6.98207246257345e-06	7.55812736098588e-06
6	PreTest, EntryTest, ExitTest, PCR 0D	19	0	0	0	0	1.01441943856096e-08	1.97255808141883e-07	-3.76477189572481e-07	3.967655783437e-07	1.01441943856096e-08	1.97255808141883e-07	-3.76477189572481e-07	3.967655783437e-07	1.43668742496568e-07	2.62041215795451e-06	-4.99233908709427e-06	5.27967657208741e-06
6	PreTest, EntryTest, ExitTest, PCR 0D	20	0	0	0	0	1.91843937708625e-09	6.0666379845472e-08	-1.16987665120039e-07	1.20824543874211e-07	1.91843937708625e-09	6.0666379845472e-08	-1.16987665120039e-07	1.20824543874211e-07	4.78789619841042e-08	1.51406571874384e-06	-2.91968984675382e-06	3.01544777072203e-06
6	PreTest, EntryTest, ExitTest, PCR 0D	21	0	0	0	0	0	0	0	0	0	0	0	0	0	0	0	0
7	PreTest, EntryTest, ExitTest, Antigen	0	1208.79356677019	28.1204915763827	1153.67740328048	1263.9097302599	3148.42244767314	51.0294034946172	3048.40481682369	3248.44007852259	4357.21601444333	63.7155353862864	4232.33356508621	4482.09846380045	0.277579642260142	0.00308627688919616	0.271530539557318	0.283628744962967
7	PreTest, EntryTest, ExitTest, Antigen	1	577.927298151277	19.4585638358603	539.788513032991	616.066083269563	1520.59712295401	35.4711382599198	1451.07369196457	1590.12055394346	2098.52442110529	44.7928804242782	2010.7303754737	2186.31846673688	0.125274525743242	0.00223364475028603	0.120896582032681	0.129652469453803
7	PreTest, EntryTest, ExitTest, Antigen	2	129.57346110654	9.22425863739104	111.493914177253	147.653008035826	361.94691051564	17.7168525550122	327.221879507816	396.671941523464	491.52037162218	21.9189247024169	448.559279205443	534.481464038917	0.0334966695744995	0.00122303066868201	0.0310995294638828	0.0358938096851163
7	PreTest, EntryTest, ExitTest, Antigen	3	19.6200293996978	3.41234065857399	12.9318417088927	26.3082170905028	64.9423593154415	7.82436241111161	49.6066089896628	80.2781096412203	84.5623887151393	9.59376108205738	65.7586169943068	103.366160435972	0.00720333188001662	0.000572222084403222	0.00608177659458631	0.00832488716544694
7	PreTest, EntryTest, ExitTest, Antigen	4	3.02836185962717	1.33145451277205	0.41871101459395	5.63801270466039	16.0255331682395	3.26763960362798	9.6209595451287	22.4301067913504	19.0538950278667	3.91470515570448	11.3810729226859	26.7267171330475	0.00348163140040905	0.000400754556043016	0.00269615247056474	0.00426711033025336
7	PreTest, EntryTest, ExitTest, Antigen	5	0.476334673527519	0.500409818656424	-0.504468571039073	1.45713791809411	5.32850005712424	1.54273296197663	2.30474345165004	8.35225666259843	5.80483473065176	1.77351545283395	2.32874444309722	9.28092501820629	0.00621861910362333	0.000529081931984528	0.00518161851693366	0.00725561969031301
7	PreTest, EntryTest, ExitTest, Antigen	6	0.0790629240849855	0.195365078265729	-0.303852629315844	0.461978477485815	1.86081890164571	0.647910457153806	0.590914405624255	3.13072339766717	1.9398818257307	0.733500521230547	0.502220804118828	3.37754284734257	0.0140584071789565	0.000826556654676241	0.0124383561357911	0.0156784582221219
7	PreTest, EntryTest, ExitTest, Antigen	7	0.0203042802607184	0.0993838406863593	-0.174488047484546	0.215096608005983	0.656090418258083	0.314403433408062	0.0398596887782821	1.27232114773788	0.676394698518801	0.364001197631424	-0.0370476488387895	1.38983704587639	0.0272413335479883	0.00114118259380984	0.025004615664121	0.0294780514318556
7	PreTest, EntryTest, ExitTest, Antigen	8	0.000634195823531993	0.010544321549927	-0.0200326744143249	0.0213010660613889	0.20492937112721	0.133968807201383	-0.0576494909875014	0.467508233241921	0.205563566950742	0.137883545242827	-0.0646881817252	0.475815315626683	0.040962138851728	0.00135801369494516	0.0383004320096355	0.0436238456938205
7	PreTest, EntryTest, ExitTest, Antigen	9	0.000398846600316721	0.00905427116168911	-0.0173475248765939	0.0181452180772274	0.0623677388395878	0.084126623201541	-0.102520442635433	0.227255920314608	0.0627665854399045	0.0904511703517672	-0.114517708449559	0.240050879329368	0.0420978829716206	0.00137786729893624	0.0393972630657056	0.0447985028775357
7	PreTest, EntryTest, ExitTest, Antigen	10	0	0	0	0	0.0146987855095409	0.00845303492664585	-0.00186916294668497	0.0312667339657668	0.0146987855095409	0.00845303492664585	-0.00186916294668497	0.0312667339657668	0.027486382700755	0.00113360659872033	0.0252645137672631	0.0297082516342468
7	PreTest, EntryTest, ExitTest, Antigen	11	9.82213900606606e-05	0.00310603307539512	-0.00598960343771377	0.00618604621783509	0.0041554002616295	0.0191898563269837	-0.0334567181392586	0.0417675186625176	0.00425362165169016	0.0222715722096869	-0.0393986598792961	0.0479059031826764	0.0118727630054978	0.000744253204920143	0.0104140267238544	0.0133314992871413
7	PreTest, EntryTest, ExitTest, Antigen	12	0	0	0	0	0.000795262507297578	0.00108387391365588	-0.00132913036346796	0.00291965537806311	0.000795262507297578	0.00108387391365588	-0.00132913036346796	0.00291965537806311	0.0037527309434945	0.000413178010838208	0.00294290204225162	0.00456255984473739
7	PreTest, EntryTest, ExitTest, Antigen	13	0	0	0	0	0.000166484730569645	0.000402051594291208	-0.000621536394241122	0.000954505855380412	0.000166484730569645	0.000402051594291208	-0.000621536394241122	0.000954505855380412	0.000960368954736387	0.000214240222163261	0.000540458119296395	0.00138027979017638
7	PreTest, EntryTest, ExitTest, Antigen	14	0	0	0	0	3.75626739085667e-05	0.000162576501179955	-0.000281087268404145	0.000356212616221278	3.75626739085667e-05	0.000162576501179955	-0.000281087268404145	0.000356212616221278	0.000221362419073694	0.000100936794927196	2.35263010163897e-05	0.000419198537130998
7	PreTest, EntryTest, ExitTest, Antigen	15	0	0	0	0	6.1479387471226e-06	2.12887710161229e-05	-3.55780524444783e-05	4.78739299387235e-05	6.1479387471226e-06	2.12887710161229e-05	-3.55780524444783e-05	4.78739299387235e-05	4.6162227448513e-05	4.59914572620303e-05	-4.39810287850665e-05	0.000136305483682092
7	PreTest, EntryTest, ExitTest, Antigen	16	0	0	0	0	1.51049120998179e-05	0.000446980774507704	-0.000860977405935281	0.000891187230134917	1.51049120998179e-05	0.000446980774507704	-0.000860977405935281	0.000891187230134917	1.05852057999327e-05	2.18986565502492e-05	-3.23361610385558e-05	5.35065726384212e-05
7	PreTest, EntryTest, ExitTest, Antigen	17	0	0	0	0	1.21695254051359e-07	7.66856178694933e-07	-1.38134285619071e-06	1.62473336429343e-06	1.21695254051359e-07	7.66856178694933e-07	-1.38134285619071e-06	1.62473336429343e-06	1.71891381163414e-06	8.89951281093464e-06	-1.57241312977977e-05	1.9161958921066e-05
7	PreTest, EntryTest, ExitTest, Antigen	18	0	0	0	0	3.62430635816084e-08	5.15673825382215e-07	-9.74477634167533e-07	1.04696376133075e-06	3.62430635816084e-08	5.15673825382215e-07	-9.74477634167533e-07	1.04696376133075e-06	3.8367181459453e-07	4.27465298902315e-06	-7.99464804389084e-06	8.7619916730799e-06
7	PreTest, EntryTest, ExitTest, Antigen	19	0	0	0	0	1.01441943856096e-08	1.97255808141883e-07	-3.76477189572481e-07	3.967655783437e-07	1.01441943856096e-08	1.97255808141883e-07	-3.76477189572481e-07	3.967655783437e-07	1.43668742496568e-07	2.62041215795451e-06	-4.99233908709427e-06	5.27967657208741e-06
7	PreTest, EntryTest, ExitTest, Antigen	20	0	0	0	0	1.91843937708625e-09	6.0666379845472e-08	-1.16987665120039e-07	1.20824543874211e-07	1.91843937708625e-09	6.0666379845472e-08	-1.16987665120039e-07	1.20824543874211e-07	4.78789619841042e-08	1.51406571874384e-06	-2.91968984675382e-06	3.01544777072203e-06
7	PreTest, EntryTest, ExitTest, Antigen	21	0	0	0	0	0	0	0	0	0	0	0	0	0	0	0	0
8	PreTest, EntryTest, ExitTest, PCR 1D	0	1349.77077117499	29.4867735909704	1291.97669493669	1407.5648474133	3517.96218569995	54.280137449293	3411.57311629934	3624.35125510056	4867.73295687494	66.6487994752236	4737.10130990351	4998.36460384638	0.264125646709069	0.00301179078932935	0.258222536761984	0.270028756656155
8	PreTest, EntryTest, ExitTest, PCR 1D	1	1294.11679680609	28.6746654752312	1237.91445247464	1350.31914113755	3515.40612876511	54.2214272961629	3409.13213126463	3621.68012626559	4809.5229255712	66.412389649345	4679.35464185849	4939.69120928392	0.238074904767803	0.00292750740686265	0.232336990250352	0.243812819285254
8	PreTest, EntryTest, ExitTest, PCR 1D	2	412.108304737271	16.4343465708299	379.896985458444	444.319624016097	1197.37845954411	32.1185525097379	1134.42609662502	1260.3308224632	1609.48676428138	40.7472063040116	1529.62223992552	1689.35128863724	0.0771185859947312	0.00188887962986748	0.0734163819201909	0.0808207900692715
8	PreTest, EntryTest, ExitTest, PCR 1D	3	74.7781600843028	6.63914081025742	61.7654440961982	87.7908760724073	264.997941891441	14.9296805582356	235.735767997299	294.260115785582	339.776101975743	18.253288775985	303.999655974813	375.552547976674	0.0169357046851363	0.000877666421977492	0.0152154784980604	0.0186559308722122
8	PreTest, EntryTest, ExitTest, PCR 1D	4	10.2307379658223	2.27487228282161	5.77198829149191	14.6894876401526	43.9477055051589	6.28859600332487	31.6220573386422	56.2733536716756	54.1784434709812	7.59429100523015	39.2936331007301	69.0632538412323	0.00371822145477673	0.000413422685469486	0.00290791299125653	0.00452852991829692
8	PreTest, EntryTest, ExitTest, PCR 1D	5	1.41982260893851	0.826409909669615	-0.199940814013939	3.03958603189095	7.72655534377495	2.37544180322089	3.07068940946202	12.3824212780879	9.14637795271346	2.80434885664189	3.64985419369534	14.6429017117316	0.00311485175008505	0.000388126347017194	0.00235412410993135	0.00387557939023875
8	PreTest, EntryTest, ExitTest, PCR 1D	6	0.202190990554671	0.303822138716919	-0.393300401330491	0.797682382439832	1.58461739508413	1.00548004127135	-0.386123485807727	3.55535827597598	1.7868083856388	1.16382772206816	-0.494293949614787	4.06791072089238	0.00628382634169409	0.000521987113106345	0.00526073160000566	0.00730692108338253
8	PreTest, EntryTest, ExitTest, PCR 1D	7	0.0308334429515702	0.118369506937519	-0.201170790645967	0.262837676549108	0.376830029731726	0.388624576727728	-0.384874140654621	1.13853420011807	0.407663472683296	0.446554895042064	-0.467584121599151	1.28291106696574	0.012946581187505	0.000774276523929885	0.0114289992006024	0.0144641631744076
8	PreTest, EntryTest, ExitTest, PCR 1D	8	0.00786024402620152	0.0612227075888344	-0.112136262847914	0.127856750900317	0.104571589736847	0.18241883176703	-0.252969320526531	0.462112500000225	0.112431833763049	0.218721527862869	-0.316262360848174	0.541126028374271	0.0213701946573988	0.000982890191579871	0.0194437298819022	0.0232966594328953
8	PreTest, EntryTest, ExitTest, PCR 1D	9	0.000229758239300147	0.00518571313998751	-0.00993423951507537	0.0103937559936757	0.0290878887063345	0.0710080158682796	-0.110087822395493	0.168263599808162	0.0293176469456347	0.073887601640719	-0.115502052270175	0.174137346161444	0.0234681467633151	0.0010423027658014	0.0214252333423443	0.0255110601842858
8	PreTest, EntryTest, ExitTest, PCR 1D	10	0.000163943548833447	0.00518435022004734	-0.00999738288245933	0.0103252699801262	0.00888019889385242	0.0456741709553645	-0.080641176178662	0.0984015739663669	0.00904414244268587	0.0498843860824365	-0.0887292542788897	0.106817539164261	0.0161566915765367	0.000889087872774656	0.0144140793458984	0.017899303807175
8	PreTest, EntryTest, ExitTest, PCR 1D	11	0	0	0	0	0.00162387948258807	0.000906938099732611	-0.000153719192887853	0.00340147815806398	0.00162387948258807	0.000906938099732611	-0.000153719192887853	0.00340147815806398	0.00727480730978878	0.000573266908085791	0.00615120416994063	0.00839841044963693
8	PreTest, EntryTest, ExitTest, PCR 1D	12	0	0	0	0	0.000374463906924724	0.000348342231634912	-0.000308286867079704	0.00105721468092915	0.000374463906924724	0.000348342231634912	-0.000308286867079704	0.00105721468092915	0.00236130578785754	0.000335822816347019	0.00170309306781738	0.0030195185078977
8	PreTest, EntryTest, ExitTest, PCR 1D	13	0	0	0	0	7.94316171198611e-05	0.000100389585907226	-0.000117331971258301	0.000276195205498023	7.94316171198611e-05	0.000100389585907226	-0.000117331971258301	0.000276195205498023	0.000616453499017218	0.00016509520859886	0.000292866890163453	0.000940040107870982
8	PreTest, EntryTest, ExitTest, PCR 1D	14	0	0	0	0	1.6968133914458e-05	3.9536702499136e-05	-6.05238029838487e-05	9.44600708127646e-05	1.6968133914458e-05	3.9536702499136e-05	-6.05238029838487e-05	9.44600708127646e-05	0.000149194770302451	8.55190328553169e-05	-1.84225340939702e-05	0.000316812074698872
8	PreTest, EntryTest, ExitTest, PCR 1D	15	0	0	0	0	3.65406386778821e-06	1.29413235404603e-05	-2.1710930271514e-05	2.90190580070904e-05	3.65406386778821e-06	1.29413235404603e-05	-2.1710930271514e-05	2.90190580070904e-05	3.24738748879722e-05	3.84624872353895e-05	-4.29126000933913e-05	0.000107860349869336
8	PreTest, EntryTest, ExitTest, PCR 1D	16	0	0	0	0	5.65934162321137e-07	2.79642161761453e-06	-4.91505220820334e-06	6.04692053284562e-06	5.65934162321137e-07	2.79642161761453e-06	-4.91505220820334e-06	6.04692053284562e-06	6.24772876834497e-06	1.7198051086505e-05	-2.74604513612049e-05	3.99559088978949e-05
8	PreTest, EntryTest, ExitTest, PCR 1D	17	0	0	0	0	1.29772673683246e-07	1.13021177015016e-06	-2.08544239581107e-06	2.34498774317756e-06	1.29772673683246e-07	1.13021177015016e-06	-2.08544239581107e-06	2.34498774317756e-06	1.43248688970905e-06	8.14970765151336e-06	-1.45409401072571e-05	1.74059138866752e-05
8	PreTest, EntryTest, ExitTest, PCR 1D	18	0	0	0	0	1.49868290944397e-08	3.05025097669661e-07	-5.82862362338095e-07	6.12836020526974e-07	1.49868290944397e-08	3.05025097669661e-07	-5.82862362338095e-07	6.12836020526974e-07	1.43783352742004e-07	2.6225011609787e-06	-4.99631892277625e-06	5.28388562826026e-06
8	PreTest, EntryTest, ExitTest, PCR 1D	19	0	0	0	0	6.82624249365083e-09	1.67171746178534e-07	-3.20830380016276e-07	3.34482865003577e-07	6.82624249365083e-09	1.67171746178534e-07	-3.20830380016276e-07	3.34482865003577e-07	9.59952108413433e-08	2.14545013471372e-06	-4.10908705319755e-06	4.30107747488024e-06
8	PreTest, EntryTest, ExitTest, PCR 1D	20	0	0	0	0	1.91843937708625e-09	6.0666379845472e-08	-1.16987665120039e-07	1.20824543874211e-07	1.91843937708625e-09	6.0666379845472e-08	-1.16987665120039e-07	1.20824543874211e-07	4.78789619841042e-08	1.51406571874384e-06	-2.91968984675382e-06	3.01544777072203e-06
8	PreTest, EntryTest, ExitTest, PCR 1D	21	0	0	0	0	0	0	0	0	0	0	0	0	0	0	0	0
9	PreTest, EntryTest, ExitTest, PCR 2D	0	1460.18945071193	31.4195034219361	1398.60722400494	1521.77167741892	3814.81608887705	56.691209185817	3703.70131887285	3925.93085888126	5275.00553958898	70.2018081613593	5137.40999559272	5412.60108358525	0.265709016279262	0.00294206215293538	0.259942574459509	0.271475458099015
9	PreTest, EntryTest, ExitTest, PCR 2D	1	1391.16920127848	30.3990594520162	1331.58704475253	1450.75135780443	3805.92964074538	56.580643798881	3695.03157889957	3916.82770259118	5197.09884202386	69.6867625043799	5060.51278751528	5333.68489653245	0.248458620888791	0.0028992409782684	0.242776108571385	0.254141133206198
9	PreTest, EntryTest, ExitTest, PCR 2D	2	1041.36891174039	24.9086241056605	992.548008493299	1090.18981498749	3528.54265226122	53.7479706029048	3423.19662987952	3633.88867464291	4569.91156400161	65.483030306556	4441.56482460076	4698.25830340246	0.220462153064011	0.00282527737713086	0.214924609404835	0.225999696723188
9	PreTest, EntryTest, ExitTest, PCR 2D	3	265.27088802428	11.7499570788955	242.240972149645	288.300803898915	1091.64190811927	30.4521536682538	1031.9556869295	1151.32812930905	1356.91279614356	36.4087324392865	1285.55168056255	1428.27391172456	0.0676121055628304	0.00173533660461823	0.0642108458177787	0.0710133653078822
9	PreTest, EntryTest, ExitTest, PCR 2D	4	37.7978006700222	4.37204938159717	29.2285838820917	46.3670174579527	185.952529736232	12.5610836686355	161.332805745706	210.572253726758	223.750330406254	14.9026456438354	194.541144944337	252.959515868172	0.0131733119642694	0.00078791632967479	0.0116289959581068	0.014717627970432
9	PreTest, EntryTest, ExitTest, PCR 2D	5	4.48859556617384	1.43972435095488	1.66673583830228	7.31045529404539	24.8873927749156	4.25738062631822	16.5429267473319	33.2318588024994	29.3759883410895	5.01871795775459	19.5393011438905	39.2126755382885	0.00310656545810376	0.000393857125321839	0.00233460549247295	0.00387852542373457
9	PreTest, EntryTest, ExitTest, PCR 2D	6	0.578067469699642	0.518919797965252	-0.439015334312252	1.59515027371154	3.59661431483879	1.62174700946552	0.41799017628637	6.77523845339121	4.17468178453843	1.88529180931443	0.479509838282151	7.86985373079471	0.00332096577297526	0.00041058390344756	0.00251622132221805	0.00412571022373248
9	PreTest, EntryTest, ExitTest, PCR 2D	7	0.0699953448679369	0.176545621531304	-0.276034073333419	0.416024763069293	0.593722045541557	0.638233150703258	-0.657214929836828	1.84465902091994	0.663717390409494	0.725202494994984	-0.757679499780674	2.08511428059966	0.00678409146179637	0.000587312485376966	0.00563295899045751	0.00793522393313522
9	PreTest, EntryTest, ExitTest, PCR 2D	8	0.00742050228646114	0.0478015888399968	-0.0862706118399325	0.101111616412855	0.0988378927192974	0.235084117729927	-0.361926978031359	0.559602763469954	0.106258395005759	0.259843608620373	-0.403035077890173	0.61555186790169	0.0118977021483074	0.000748546862312101	0.0104305502981757	0.0133648539984391
9	PreTest, EntryTest, ExitTest, PCR 2D	9	0.00238024608951448	0.0242487595478761	-0.0451473226243227	0.0499078148033516	0.0305096519308254	0.132216809854681	-0.22863529538435	0.289654599246001	0.0328898980203398	0.148754116298798	-0.258668169925303	0.324447965965983	0.0140647917292394	0.000791429173759859	0.0125135905486701	0.0156159929098088
9	PreTest, EntryTest, ExitTest, PCR 2D	10	0	0	0	0	0.00392343177359585	0.0177357743744628	-0.0308386860003513	0.038685549547543	0.00392343177359585	0.0177357743744628	-0.0308386860003513	0.038685549547543	0.0103778960809409	0.000702467076584448	0.00900106061083538	0.0117547315510464
9	PreTest, EntryTest, ExitTest, PCR 2D	11	0	0	0	0	0.00114958547392265	0.0047416309554074	-0.00814401119867585	0.0104431821465212	0.00114958547392265	0.0047416309554074	-0.00814401119867585	0.0104431821465212	0.00489682413548668	0.000480545602637239	0.00395495475431769	0.00583869351665567
9	PreTest, EntryTest, ExitTest, PCR 2D	12	0	0	0	0	0.00108051403769274	0.0253419465096066	-0.0485897011211362	0.0507507291965217	0.00108051403769274	0.0253419465096066	-0.0485897011211362	0.0507507291965217	0.00167712493238227	0.000274248337679386	0.00113959819053067	0.00221465167423386
9	PreTest, EntryTest, ExitTest, PCR 2D	13	0	0	0	0	7.45014643159287e-05	0.000403094666652242	-0.000715564082322465	0.000864567010954322	7.45014643159287e-05	0.000403094666652242	-0.000715564082322465	0.000864567010954322	0.000457809109902707	0.000142159524621059	0.000179176441645433	0.000736441778159982
9	PreTest, EntryTest, ExitTest, PCR 2D	14	0	0	0	0	1.4392079190971e-05	5.32632583748923e-05	-9.00039072238178e-05	0.00011878806560576	1.4392079190971e-05	5.32632583748923e-05	-9.00039072238178e-05	0.00011878806560576	0.000113315709388862	7.11620808273542e-05	-2.61619690327525e-05	0.000252793387810476
9	PreTest, EntryTest, ExitTest, PCR 2D	15	0	0	0	0	2.78772898794484e-06	1.17828316295534e-05	-2.03066210059798e-05	2.58820789818695e-05	2.78772898794484e-06	1.17828316295534e-05	-2.03066210059798e-05	2.58820789818695e-05	2.46574973203066e-05	3.38131267107931e-05	-4.16162310328479e-05	9.09312256734611e-05
9	PreTest, EntryTest, ExitTest, PCR 2D	16	0	0	0	0	6.10125050593139e-07	3.56419008119785e-06	-6.37568750855464e-06	7.59593760974092e-06	6.10125050593139e-07	3.56419008119785e-06	-6.37568750855464e-06	7.59593760974092e-06	5.67322239717801e-06	1.64449410718141e-05	-2.65588621035777e-05	3.79053068979337e-05
9	PreTest, EntryTest, ExitTest, PCR 2D	17	0	0	0	0	6.32777038114686e-08	5.60933570327689e-07	-1.0361520940308e-06	1.16270750165374e-06	6.32777038114686e-08	5.60933570327689e-07	-1.0361520940308e-06	1.16270750165374e-06	9.07402619217234e-07	6.52351639565008e-06	-1.18786895162569e-05	1.36934947546914e-05
9	PreTest, EntryTest, ExitTest, PCR 2D	18	0	0	0	0	1.0225182065301e-07	2.51915903847438e-06	-4.83529989475677e-06	5.03980353606279e-06	1.0225182065301e-07	2.51915903847438e-06	-4.83529989475677e-06	5.03980353606279e-06	3.32871598455162e-07	3.96673473185089e-06	-7.44192847597259e-06	8.10767167288291e-06
9	PreTest, EntryTest, ExitTest, PCR 2D	19	0	0	0	0	1.17678186826753e-08	2.037474809883e-07	-3.87577244054392e-07	4.11112881419743e-07	1.17678186826753e-08	2.037474809883e-07	-3.87577244054392e-07	4.11112881419743e-07	1.91766477093269e-07	3.02755971612144e-06	-5.74225056650476e-06	6.1257835206913e-06
9	PreTest, EntryTest, ExitTest, PCR 2D	20	0	0	0	0	2.53157323747344e-08	5.65636564593785e-07	-1.08333193422908e-06	1.13396339897855e-06	2.53157323747344e-08	5.65636564593785e-07	-1.08333193422908e-06	1.13396339897855e-06	1.42740033561333e-07	2.60348180444044e-06	-4.96008430314193e-06	5.24556437026459e-06
9	PreTest, EntryTest, ExitTest, PCR 2D	21	0	0	0	0	0	0	0	0	0	0	0	0	0	0	0	0
10	PreTest, EntryTest, ExitTest, DailyTest, PCR 0D	0	1077.50752547889	26.7655180510294	1025.04711009887	1129.96794085891	2803.58542895075	49.0698401878045	2707.40854218265	2899.76231571885	3881.09295442964	61.3140425810043	3760.91743097087	4001.26847788841	0.240198129473613	0.00294004093062727	0.234435649249583	0.245960609697642
10	PreTest, EntryTest, ExitTest, DailyTest, PCR 0D	1	226.76564819152	12.2692057809079	202.718004860941	250.8132915221	598.043067959365	23.2663858965852	552.440951602058	643.645184316672	824.808716150886	29.3048221538161	767.371264729406	882.246167572365	0.0498049642379575	0.00149502151054994	0.0468747220772796	0.0527352063986354
10	PreTest, EntryTest, ExitTest, DailyTest, PCR 0D	2	12.308648160429	2.8663394567675	6.69062282516468	17.9266734956933	35.0146956349625	5.56785449226648	24.1017008301202	45.9276904398048	47.3233437953915	6.89705018660263	33.8051254296504	60.8415621611327	0.0044110531986571	0.00046794368045634	0.00349388358496267	0.00532822281235152
10	PreTest, EntryTest, ExitTest, DailyTest, PCR 0D	3	0.320706265648713	0.46342323317358	-0.587603271371503	1.22901580266893	1.07914455556746	0.979727894713097	-0.841122118070206	2.99941122920513	1.39985082121618	1.2202418536192	-0.991823211877463	3.79152485430982	0.000283191133912076	0.000115542051989016	5.67287120136052e-05	0.000509653555810548
10	PreTest, EntryTest, ExitTest, DailyTest, PCR 0D	4	0.011704045582831	0.101023727657682	-0.186302460626226	0.209710551791888	0.0303774672190585	0.168510928813918	-0.299903953256222	0.360658887694339	0.0420815128018894	0.21649411112573	-0.382246945004541	0.46640997060832	1.38224292385345e-05	2.53993270773445e-05	-3.59602518330607e-05	6.36051103101297e-05
10	PreTest, EntryTest, ExitTest, DailyTest, PCR 0D	5	0	0	0	0	1.67344932350095e-08	2.02640634915507e-07	-3.80441151199385e-07	4.13910137669404e-07	1.67344932350095e-08	2.02640634915507e-07	-3.80441151199385e-07	4.13910137669404e-07	3.32433171975035e-07	3.96143988661498e-06	-7.43198900579033e-06	8.0968553497404e-06
10	PreTest, EntryTest, ExitTest, DailyTest, PCR 0D	6	0	0	0	0	0	0	0	0	0	0	0	0	0	0	0	0
10	PreTest, EntryTest, ExitTest, DailyTest, PCR 0D	7	0	0	0	0	0	0	0	0	0	0	0	0	0	0	0	0
10	PreTest, EntryTest, ExitTest, DailyTest, PCR 0D	8	0	0	0	0	0	0	0	0	0	0	0	0	0	0	0	0
10	PreTest, EntryTest, ExitTest, DailyTest, PCR 0D	9	0	0	0	0	0	0	0	0	0	0	0	0	0	0	0	0
10	PreTest, EntryTest, ExitTest, DailyTest, PCR 0D	10	0	0	0	0	0	0	0	0	0	0	0	0	0	0	0	0
10	PreTest, EntryTest, ExitTest, DailyTest, PCR 0D	11	0	0	0	0	0	0	0	0	0	0	0	0	0	0	0	0
10	PreTest, EntryTest, ExitTest, DailyTest, PCR 0D	12	0	0	0	0	0	0	0	0	0	0	0	0	0	0	0	0
10	PreTest, EntryTest, ExitTest, DailyTest, PCR 0D	13	0	0	0	0	0	0	0	0	0	0	0	0	0	0	0	0
10	PreTest, EntryTest, ExitTest, DailyTest, PCR 0D	14	0	0	0	0	0	0	0	0	0	0	0	0	0	0	0	0
10	PreTest, EntryTest, ExitTest, DailyTest, PCR 0D	15	0	0	0	0	0	0	0	0	0	0	0	0	0	0	0	0
10	PreTest, EntryTest, ExitTest, DailyTest, PCR 0D	16	0	0	0	0	0	0	0	0	0	0	0	0	0	0	0	0
10	PreTest, EntryTest, ExitTest, DailyTest, PCR 0D	17	0	0	0	0	0	0	0	0	0	0	0	0	0	0	0	0
10	PreTest, EntryTest, ExitTest, DailyTest, PCR 0D	18	0	0	0	0	0	0	0	0	0	0	0	0	0	0	0	0
10	PreTest, EntryTest, ExitTest, DailyTest, PCR 0D	19	0	0	0	0	0	0	0	0	0	0	0	0	0	0	0	0
10	PreTest, EntryTest, ExitTest, DailyTest, PCR 0D	20	0	0	0	0	0	0	0	0	0	0	0	0	0	0	0	0
10	PreTest, EntryTest, ExitTest, DailyTest, PCR 0D	21	0	0	0	0	0	0	0	0	0	0	0	0	0	0	0	0
11	PreTest, EntryTest, ExitTest, DailyTest, Antigen	0	1208.79356677019	28.1204915763827	1153.67740328048	1263.9097302599	3148.42244767314	51.0294034946172	3048.40481682369	3248.44007852259	4357.21601444333	63.7155353862864	4232.33356508621	4482.09846380045	0.277579642260142	0.00308627688919616	0.271530539557318	0.283628744962967
11	PreTest, EntryTest, ExitTest, DailyTest, Antigen	1	372.382329950454	15.771728196248	341.469742685808	403.2949172151	983.649248770974	29.0858037669779	926.641073387697	1040.65742415425	1356.03157872143	37.1095484708608	1283.29686371854	1428.76629372431	0.0849666535396614	0.00192052640377986	0.0812024217882528	0.0887308852910699
11	PreTest, EntryTest, ExitTest, DailyTest, Antigen	2	28.66758757253	4.23803286851506	20.3610431502405	36.9741319948196	81.733603422199	8.60965850865481	64.8586727452356	98.6085340991624	110.401190994729	10.5071691705195	89.8071394205108	130.995242568947	0.0106398977379411	0.000704760910313342	0.00925856635372693	0.0120212291221552
11	PreTest, EntryTest, ExitTest, DailyTest, Antigen	3	0.95430832785792	0.779408875087209	-0.573333067313009	2.48194972302885	3.10090316241245	1.67962173048358	-0.19115542933537	6.39296175416027	4.05521149027037	2.06238925598821	0.012928548533484	8.09749443200726	0.000896627731391608	0.000214197562816072	0.000476800508272107	0.00131645495451111
11	PreTest, EntryTest, ExitTest, DailyTest, Antigen	4	0.0294446265489112	0.135618680138184	-0.23636798652193	0.295257239619752	0.089022039176093	0.290930879829077	-0.481202485288899	0.659246563641085	0.118466665725004	0.359237985331931	-0.585639785525581	0.822573116975589	5.82534605684839e-05	5.31162660691981e-05	-4.58544209271444e-05	0.000162361342064112
11	PreTest, EntryTest, ExitTest, DailyTest, Antigen	5	0.000558085280087567	0.0125398346468644	-0.0240199906277667	0.0251361611879418	0.0041503841000498	0.0660046588103862	-0.125218747168307	0.133519515368407	0.00470846938013737	0.0743818374756644	-0.141079932072165	0.150496870832439	2.29116869693063e-06	1.02089901086319e-05	-1.77184519159878e-05	2.23007893098491e-05
11	PreTest, EntryTest, ExitTest, DailyTest, Antigen	6	0	0	0	0	0	0	0	0	0	0	0	0	0	0	0	0
11	PreTest, EntryTest, ExitTest, DailyTest, Antigen	7	0	0	0	0	0	0	0	0	0	0	0	0	0	0	0	0
11	PreTest, EntryTest, ExitTest, DailyTest, Antigen	8	0	0	0	0	0	0	0	0	0	0	0	0	0	0	0	0
11	PreTest, EntryTest, ExitTest, DailyTest, Antigen	9	0	0	0	0	0	0	0	0	0	0	0	0	0	0	0	0
11	PreTest, EntryTest, ExitTest, DailyTest, Antigen	10	0	0	0	0	0	0	0	0	0	0	0	0	0	0	0	0
11	PreTest, EntryTest, ExitTest, DailyTest, Antigen	11	0	0	0	0	0	0	0	0	0	0	0	0	0	0	0	0
11	PreTest, EntryTest, ExitTest, DailyTest, Antigen	12	0	0	0	0	0	0	0	0	0	0	0	0	0	0	0	0
11	PreTest, EntryTest, ExitTest, DailyTest, Antigen	13	0	0	0	0	0	0	0	0	0	0	0	0	0	0	0	0
11	PreTest, EntryTest, ExitTest, DailyTest, Antigen	14	0	0	0	0	0	0	0	0	0	0	0	0	0	0	0	0
11	PreTest, EntryTest, ExitTest, DailyTest, Antigen	15	0	0	0	0	0	0	0	0	0	0	0	0	0	0	0	0
11	PreTest, EntryTest, ExitTest, DailyTest, Antigen	16	0	0	0	0	0	0	0	0	0	0	0	0	0	0	0	0
11	PreTest, EntryTest, ExitTest, DailyTest, Antigen	17	0	0	0	0	0	0	0	0	0	0	0	0	0	0	0	0
11	PreTest, EntryTest, ExitTest, DailyTest, Antigen	18	0	0	0	0	0	0	0	0	0	0	0	0	0	0	0	0
11	PreTest, EntryTest, ExitTest, DailyTest, Antigen	19	0	0	0	0	0	0	0	0	0	0	0	0	0	0	0	0
11	PreTest, EntryTest, ExitTest, DailyTest, Antigen	20	0	0	0	0	0	0	0	0	0	0	0	0	0	0	0	0
11	PreTest, EntryTest, ExitTest, DailyTest, Antigen	21	0	0	0	0	0	0	0	0	0	0	0	0	0	0	0	0
12	PreTest, EntryTest, ExitTest, DailyTest, PCR 1D	0	1349.77077117499	29.4867735909704	1291.97669493669	1407.5648474133	3517.96218569995	54.280137449293	3411.57311629934	3624.35125510056	4867.73295687494	66.6487994752236	4737.10130990351	4998.36460384638	0.264125646709069	0.00301179078932935	0.258222536761984	0.270028756656155
12	PreTest, EntryTest, ExitTest, DailyTest, PCR 1D	1	1294.11679680609	28.6746654752312	1237.91445247464	1350.31914113755	3515.40612876511	54.2214272961629	3409.13213126463	3621.68012626559	4809.5229255712	66.412389649345	4679.35464185849	4939.69120928392	0.238074904767803	0.00292750740686265	0.232336990250352	0.243812819285254
12	PreTest, EntryTest, ExitTest, DailyTest, PCR 1D	2	224.433677562914	12.1247195878867	200.669227170656	248.198127955172	620.849040856749	23.525516077371	574.739029345102	666.959052368397	845.282718419663	29.475100113865	787.511522196488	903.053914642839	0.0404571463810546	0.00135314121772444	0.0378049895943147	0.0431093031677944
12	PreTest, EntryTest, ExitTest, DailyTest, PCR 1D	3	11.5685069430299	2.70767015965806	6.26147343010012	16.8755404559597	36.0288536266413	5.60421978169048	25.044582854528	47.0131243987547	47.5973605696712	6.86572890333247	34.1405319191396	61.0541892202029	0.00235837241269885	0.000331026195229334	0.00170956107004936	0.00300718375534835
12	PreTest, EntryTest, ExitTest, DailyTest, PCR 1D	4	0.307481958725245	0.440054192894368	-0.555024259347715	1.16998817679821	1.11250046873721	0.988231620238639	-0.824433506930525	3.04943444440494	1.41998242746245	1.21195866509367	-0.955456556121145	3.79542141104605	7.23112129604795e-05	5.98034352792076e-05	-4.49035201867675e-05	0.000189525946107726
12	PreTest, EntryTest, ExitTest, DailyTest, PCR 1D	5	0.00873696797895753	0.0739295028015943	-0.136164857512167	0.153638793470082	0.0309764686318054	0.170411494888583	-0.303030061349817	0.364982998613428	0.0397134366107629	0.205406446927236	-0.362883199366621	0.442310072588146	2.0498072528651e-06	9.6752082978225e-06	-1.6913601010867e-05	2.10132155165972e-05
12	PreTest, EntryTest, ExitTest, DailyTest, PCR 1D	6	0	0	0	0	0	0	0	0	0	0	0	0	0	0	0	0
12	PreTest, EntryTest, ExitTest, DailyTest, PCR 1D	7	0	0	0	0	0	0	0	0	0	0	0	0	0	0	0	0
12	PreTest, EntryTest, ExitTest, DailyTest, PCR 1D	8	0	0	0	0	0	0	0	0	0	0	0	0	0	0	0	0
12	PreTest, EntryTest, ExitTest, DailyTest, PCR 1D	9	0	0	0	0	0	0	0	0	0	0	0	0	0	0	0	0
12	PreTest, EntryTest, ExitTest, DailyTest, PCR 1D	10	0	0	0	0	0	0	0	0	0	0	0	0	0	0	0	0
12	PreTest, EntryTest, ExitTest, DailyTest, PCR 1D	11	0	0	0	0	0	0	0	0	0	0	0	0	0	0	0	0
12	PreTest, EntryTest, ExitTest, DailyTest, PCR 1D	12	0	0	0	0	0	0	0	0	0	0	0	0	0	0	0	0
12	PreTest, EntryTest, ExitTest, DailyTest, PCR 1D	13	0	0	0	0	0	0	0	0	0	0	0	0	0	0	0	0
12	PreTest, EntryTest, ExitTest, DailyTest, PCR 1D	14	0	0	0	0	0	0	0	0	0	0	0	0	0	0	0	0
12	PreTest, EntryTest, ExitTest, DailyTest, PCR 1D	15	0	0	0	0	0	0	0	0	0	0	0	0	0	0	0	0
12	PreTest, EntryTest, ExitTest, DailyTest, PCR 1D	16	0	0	0	0	0	0	0	0	0	0	0	0	0	0	0	0
12	PreTest, EntryTest, ExitTest, DailyTest, PCR 1D	17	0	0	0	0	0	0	0	0	0	0	0	0	0	0	0	0
12	PreTest, EntryTest, ExitTest, DailyTest, PCR 1D	18	0	0	0	0	0	0	0	0	0	0	0	0	0	0	0	0
12	PreTest, EntryTest, ExitTest, DailyTest, PCR 1D	19	0	0	0	0	0	0	0	0	0	0	0	0	0	0	0	0
12	PreTest, EntryTest, ExitTest, DailyTest, PCR 1D	20	0	0	0	0	0	0	0	0	0	0	0	0	0	0	0	0
12	PreTest, EntryTest, ExitTest, DailyTest, PCR 1D	21	0	0	0	0	0	0	0	0	0	0	0	0	0	0	0	0
13	PreTest, EntryTest, ExitTest, DailyTest, PCR 2D	0	1460.18945071193	31.4195034219361	1398.60722400494	1521.77167741892	3814.81608887705	56.691209185817	3703.70131887285	3925.93085888126	5275.00553958898	70.2018081613593	5137.40999559272	5412.60108358525	0.265709016279262	0.00294206215293538	0.259942574459509	0.271475458099015
13	PreTest, EntryTest, ExitTest, DailyTest, PCR 2D	1	1391.16920127848	30.3990594520162	1331.58704475253	1450.75135780443	3805.92964074538	56.580643798881	3695.03157889957	3916.82770259118	5197.09884202386	69.6867625043799	5060.51278751528	5333.68489653245	0.248458620888791	0.0028992409782684	0.242776108571385	0.254141133206198
13	PreTest, EntryTest, ExitTest, DailyTest, PCR 2D	2	1041.36891174039	24.9086241056605	992.548008493299	1090.18981498749	3528.54265226122	53.7479706029048	3423.19662987952	3633.88867464291	4569.91156400161	65.483030306556	4441.56482460076	4698.25830340246	0.220462153064011	0.00282527737713086	0.214924609404835	0.225999696723188
13	PreTest, EntryTest, ExitTest, DailyTest, PCR 2D	3	158.000650034388	9.21291663224875	139.943333435181	176.057966633596	616.365240793761	23.0915134454404	571.105874440698	661.624607146824	774.365890828149	27.9029525980059	719.676103736058	829.055677920241	0.037194158534265	0.00130956081147509	0.0346274193437738	0.0397608977247562
13	PreTest, EntryTest, ExitTest, DailyTest, PCR 2D	4	7.7772909949084	2.00889191198515	3.8398628474175	11.7147191423993	33.1559923636799	5.34436884286677	22.681029431661	43.6309552956988	40.9332833585883	6.39184656630928	28.4052640886221	53.4613026285545	0.00205891779365085	0.00031212199261226	0.00144715868813082	0.00267067689917088
13	PreTest, EntryTest, ExitTest, DailyTest, PCR 2D	5	0.237615988495678	0.363332663705575	-0.474516032367249	0.949748009358605	0.971867838425311	0.92774542728909	-0.846513199061305	2.79024887591193	1.20948382692099	1.12347610034643	-0.992529329758012	3.41149698359999	6.08802028596744e-05	5.41783785289203e-05	-4.53094190570095e-05	0.000167069824776358
13	PreTest, EntryTest, ExitTest, DailyTest, PCR 2D	6	0.00623532912283817	0.0601652586023442	-0.111688577737756	0.124159235983433	0.0229773997097795	0.148611142601476	-0.268300439789114	0.314255239208673	0.0292127288326177	0.17969734579476	-0.322994068925113	0.381419526590348	1.42695529544602e-06	8.39360189287284e-06	-1.50245044145848e-05	1.78784150054768e-05
13	PreTest, EntryTest, ExitTest, DailyTest, PCR 2D	7	0	0	0	0	0	0	0	0	0	0	0	0	0	0	0	0
13	PreTest, EntryTest, ExitTest, DailyTest, PCR 2D	8	0	0	0	0	0	0	0	0	0	0	0	0	0	0	0	0
13	PreTest, EntryTest, ExitTest, DailyTest, PCR 2D	9	0	0	0	0	0	0	0	0	0	0	0	0	0	0	0	0
13	PreTest, EntryTest, ExitTest, DailyTest, PCR 2D	10	0	0	0	0	0	0	0	0	0	0	0	0	0	0	0	0
13	PreTest, EntryTest, ExitTest, DailyTest, PCR 2D	11	0	0	0	0	0	0	0	0	0	0	0	0	0	0	0	0
13	PreTest, EntryTest, ExitTest, DailyTest, PCR 2D	12	0	0	0	0	0	0	0	0	0	0	0	0	0	0	0	0
13	PreTest, EntryTest, ExitTest, DailyTest, PCR 2D	13	0	0	0	0	0	0	0	0	0	0	0	0	0	0	0	0
13	PreTest, EntryTest, ExitTest, DailyTest, PCR 2D	14	0	0	0	0	0	0	0	0	0	0	0	0	0	0	0	0
13	PreTest, EntryTest, ExitTest, DailyTest, PCR 2D	15	0	0	0	0	0	0	0	0	0	0	0	0	0	0	0	0
13	PreTest, EntryTest, ExitTest, DailyTest, PCR 2D	16	0	0	0	0	0	0	0	0	0	0	0	0	0	0	0	0
13	PreTest, EntryTest, ExitTest, DailyTest, PCR 2D	17	0	0	0	0	0	0	0	0	0	0	0	0	0	0	0	0
13	PreTest, EntryTest, ExitTest, DailyTest, PCR 2D	18	0	0	0	0	0	0	0	0	0	0	0	0	0	0	0	0
13	PreTest, EntryTest, ExitTest, DailyTest, PCR 2D	19	0	0	0	0	0	0	0	0	0	0	0	0	0	0	0	0
13	PreTest, EntryTest, ExitTest, DailyTest, PCR 2D	20	0	0	0	0	0	0	0	0	0	0	0	0	0	0	0	0
13	PreTest, EntryTest, ExitTest, DailyTest, PCR 2D	21	0	0	0	0	0	0	0	0	0	0	0	0	0	0	0	0
14	PreTest, EntryTest, ExitTest, TestEvery2Days, PCR 0D	0	1077.50752547889	26.7655180510294	1025.04711009887	1129.96794085891	2803.58542895075	49.0698401878045	2707.40854218265	2899.76231571885	3881.09295442964	61.3140425810043	3760.91743097087	4001.26847788841	0.240198129473613	0.00294004093062727	0.234435649249583	0.245960609697642
14	PreTest, EntryTest, ExitTest, TestEvery2Days, PCR 0D	1	226.76564819152	12.2692057809079	202.718004860941	250.8132915221	598.043067959365	23.2663858965852	552.440951602058	643.645184316672	824.808716150886	29.3048221538161	767.371264729406	882.246167572365	0.0498049642379575	0.00149502151054994	0.0468747220772796	0.0527352063986354
14	PreTest, EntryTest, ExitTest, TestEvery2Days, PCR 0D	2	55.9317861721528	6.03858961104663	44.0961505345014	67.7674218098042	153.663422560911	11.5566281636386	131.01243136018	176.314413761643	209.595208733064	14.2988861315947	181.569391915139	237.62102555099	0.0129339099075071	0.000775796287168506	0.0114133491846568	0.0144544706303573
14	PreTest, EntryTest, ExitTest, TestEvery2Days, PCR 0D	3	0.890516910300405	0.744468456182496	-0.568641263817287	2.3496750844181	2.83175402732688	1.61019439059661	-0.324226978242477	5.98773503289623	3.72227093762728	1.98125992583324	-0.16099851700587	7.60554039226043	0.000572125300227795	0.000165983468820118	0.000246797701340364	0.000897452899115225
14	PreTest, EntryTest, ExitTest, TestEvery2Days, PCR 0D	4	0.242269975031364	0.386105751933543	-0.514497298758381	0.999037248821108	0.836923597740386	0.859107569672643	-0.846927238817994	2.52077443429877	1.07919357277175	1.04834395613557	-0.975560581253961	3.13394772679746	9.77326529061661e-05	6.53967074774126e-05	-3.04448937495626e-05	0.000225910199561895
14	PreTest, EntryTest, ExitTest, TestEvery2Days, PCR 0D	5	0.00119810290653217	0.028442665589242	-0.0545495216483821	0.0569457274614464	0.00759026396418595	0.0832979142505301	-0.155673647966853	0.170854175895225	0.00878836687071812	0.0928783142449749	-0.173253129049433	0.190829862790869	4.76737176994244e-06	1.52376401175471e-05	-2.50984028604498e-05	3.46331464003347e-05
14	PreTest, EntryTest, ExitTest, TestEvery2Days, PCR 0D	6	0.000179345652553473	0.00567140750518168	-0.0109366130576026	0.0112953043627096	0.00163068634677384	0.0258571434277793	-0.0490493147716736	0.0523106874652213	0.00181003199932731	0.0305867721047201	-0.0581400413259241	0.0617601053245787	2.4806781798631e-06	1.05973951664817e-05	-1.8290216346441e-05	2.32515727061672e-05
14	PreTest, EntryTest, ExitTest, TestEvery2Days, PCR 0D	7	0	0	0	0	1.223406989218e-05	0.000164857934027068	-0.000310887480800873	0.000335355620585233	1.223406989218e-05	0.000164857934027068	-0.000310887480800873	0.000335355620585233	1.43039226821391e-06	8.13776418570264e-06	-1.45196255357633e-05	1.73804100721911e-05
14	PreTest, EntryTest, ExitTest, TestEvery2Days, PCR 0D	8	0	0	0	0	2.29370179758539e-06	3.95845351183264e-05	-7.52919870343344e-05	7.98793906295052e-05	2.29370179758539e-06	3.95845351183264e-05	-7.52919870343344e-05	7.98793906295052e-05	2.2424070233127e-06	1.03257634601327e-05	-1.79960893585475e-05	2.24809034051729e-05
14	PreTest, EntryTest, ExitTest, TestEvery2Days, PCR 0D	9	0	0	0	0	2.95556696154552e-07	3.8786812865989e-06	-7.30665862557929e-06	7.8977720178884e-06	2.95556696154552e-07	3.8786812865989e-06	-7.30665862557929e-06	7.8977720178884e-06	9.05636486109228e-07	6.5107953214685e-06	-1.1855522343969e-05	1.36667953161875e-05
14	PreTest, EntryTest, ExitTest, TestEvery2Days, PCR 0D	10	0	0	0	0	4.43892464154671e-08	6.38953785662377e-07	-1.20796017348279e-06	1.29673866631373e-06	4.43892464154671e-08	6.38953785662377e-07	-1.20796017348279e-06	1.29673866631373e-06	3.80572795184081e-07	4.24003069953259e-06	-7.92988737589979e-06	8.69103296626795e-06
14	PreTest, EntryTest, ExitTest, TestEvery2Days, PCR 0D	11	0	0	0	0	4.44873185644958e-09	1.02407070863229e-07	-1.96269127035479e-07	2.05166590748378e-07	4.44873185644958e-09	1.02407070863229e-07	-1.96269127035479e-07	2.05166590748378e-07	9.51862115514061e-08	2.12736555859376e-06	-4.07445028329237e-06	4.26482270639518e-06
14	PreTest, EntryTest, ExitTest, TestEvery2Days, PCR 0D	12	0	0	0	0	0	0	0	0	0	0	0	0	0	0	0	0
14	PreTest, EntryTest, ExitTest, TestEvery2Days, PCR 0D	13	0	0	0	0	0	0	0	0	0	0	0	0	0	0	0	0
14	PreTest, EntryTest, ExitTest, TestEvery2Days, PCR 0D	14	0	0	0	0	0	0	0	0	0	0	0	0	0	0	0	0
14	PreTest, EntryTest, ExitTest, TestEvery2Days, PCR 0D	15	0	0	0	0	0	0	0	0	0	0	0	0	0	0	0	0
14	PreTest, EntryTest, ExitTest, TestEvery2Days, PCR 0D	16	0	0	0	0	0	0	0	0	0	0	0	0	0	0	0	0
14	PreTest, EntryTest, ExitTest, TestEvery2Days, PCR 0D	17	0	0	0	0	0	0	0	0	0	0	0	0	0	0	0	0
14	PreTest, EntryTest, ExitTest, TestEvery2Days, PCR 0D	18	0	0	0	0	0	0	0	0	0	0	0	0	0	0	0	0
14	PreTest, EntryTest, ExitTest, TestEvery2Days, PCR 0D	19	0	0	0	0	0	0	0	0	0	0	0	0	0	0	0	0
14	PreTest, EntryTest, ExitTest, TestEvery2Days, PCR 0D	20	0	0	0	0	0	0	0	0	0	0	0	0	0	0	0	0
14	PreTest, EntryTest, ExitTest, TestEvery2Days, PCR 0D	21	0	0	0	0	0	0	0	0	0	0	0	0	0	0	0	0
15	PreTest, EntryTest, ExitTest, TestEvery2Days, Antigen	0	1208.79356677019	28.1204915763827	1153.67740328048	1263.9097302599	3148.42244767314	51.0294034946172	3048.40481682369	3248.44007852259	4357.21601444333	63.7155353862864	4232.33356508621	4482.09846380045	0.277579642260142	0.00308627688919616	0.271530539557318	0.283628744962967
15	PreTest, EntryTest, ExitTest, TestEvery2Days, Antigen	1	372.382329950454	15.771728196248	341.469742685808	403.2949172151	983.649248770974	29.0858037669779	926.641073387697	1040.65742415425	1356.03157872143	37.1095484708608	1283.29686371854	1428.76629372431	0.0849666535396614	0.00192052640377986	0.0812024217882528	0.0887308852910699
15	PreTest, EntryTest, ExitTest, TestEvery2Days, Antigen	2	96.1766881828733	8.14852425229689	80.2055806483714	112.147795717375	266.330587633066	15.3595227554754	236.225923032335	296.435252233798	362.50727581594	19.0286006946506	325.211218454425	399.803333177455	0.0235657738141677	0.00104292798279145	0.0215216349678964	0.0256099126604389
15	PreTest, EntryTest, ExitTest, TestEvery2Days, Antigen	3	1.85123501942745	1.05130641813475	-0.209325560116657	3.91179559897155	5.85297267148222	2.31578348080774	1.31403704909905	10.3919082938654	7.70420769090967	2.80769244680046	2.20113049518077	13.2072848866386	0.00138186348472857	0.00026224902894588	0.000867855387994641	0.00189587158146249
15	PreTest, EntryTest, ExitTest, TestEvery2Days, Antigen	4	0.479352037882633	0.534721251004648	-0.568701614086477	1.52740568985174	1.58309679682826	1.18378944856695	-0.737130522362964	3.90332411601949	2.0624488347109	1.43899754865732	-0.757986360657446	4.88288403007924	0.000221731699106322	0.000100792954343211	2.41775085936281e-05	0.000419285889619016
15	PreTest, EntryTest, ExitTest, TestEvery2Days, Antigen	5	0.00308487509545027	0.0269742234511398	-0.0497846028687837	0.0559543530596842	0.0213055833517294	0.136846030503716	-0.246912636435554	0.289523803139013	0.0243904584471796	0.15678288777634	-0.282904001594446	0.331684918488805	1.31103236670548e-05	2.44802382581648e-05	-3.48709433189483e-05	6.10915906530579e-05
15	PreTest, EntryTest, ExitTest, TestEvery2Days, Antigen	6	0.000740903141580303	0.0119875992631111	-0.0227547914141174	0.024236597697278	0.0103019382675542	0.102539536646761	-0.190675553560097	0.211279430095205	0.0110428414091345	0.109217585283206	-0.203023625745949	0.225109308564218	8.19681864461342e-06	1.9576675980185e-05	-3.01734662765491e-05	4.65671035657759e-05
15	PreTest, EntryTest, ExitTest, TestEvery2Days, Antigen	7	0	0	0	0	2.07147708469591e-05	0.000226890018819891	-0.000423989666040026	0.000465419207733944	2.07147708469591e-05	0.000226890018819891	-0.000423989666040026	0.000465419207733944	6.48046373367474e-06	1.71595628539311e-05	-2.71522794600302e-05	4.01132069273797e-05
15	PreTest, EntryTest, ExitTest, TestEvery2Days, Antigen	8	0	0	0	0	1.02863001765037e-05	0.000185790019383654	-0.000353862137815457	0.000374434738168465	1.02863001765037e-05	0.000185790019383654	-0.000353862137815457	0.000374434738168465	6.15032997023871e-06	1.68287302167022e-05	-2.68339812544977e-05	3.91346411949751e-05
15	PreTest, EntryTest, ExitTest, TestEvery2Days, Antigen	9	0	0	0	0	6.6223686891594e-07	5.60198599932974e-06	-1.03176556897703e-05	1.16421294276022e-05	6.6223686891594e-07	5.60198599932974e-06	-1.03176556897703e-05	1.16421294276022e-05	2.57774962096609e-06	1.07948082339722e-05	-1.85800745176194e-05	2.37355737595516e-05
15	PreTest, EntryTest, ExitTest, TestEvery2Days, Antigen	10	0	0	0	0	9.14189922445766e-08	9.11283637053592e-07	-1.69469693638046e-06	1.87753492086962e-06	9.14189922445766e-08	9.11283637053592e-07	-1.69469693638046e-06	1.87753492086962e-06	8.59304806541637e-07	6.35026180124863e-06	-1.15872083239057e-05	1.33058179369889e-05
15	PreTest, EntryTest, ExitTest, TestEvery2Days, Antigen	11	0	0	0	0	5.56369537613429e-09	1.29069386554409e-07	-2.47412302270508e-07	2.58539693022777e-07	5.56369537613429e-09	1.29069386554409e-07	-2.47412302270508e-07	2.58539693022777e-07	9.49573709343905e-08	2.12229468342813e-06	-4.06474020858475e-06	4.25465495045353e-06
15	PreTest, EntryTest, ExitTest, TestEvery2Days, Antigen	12	0	0	0	0	0	0	0	0	0	0	0	0	0	0	0	0
15	PreTest, EntryTest, ExitTest, TestEvery2Days, Antigen	13	0	0	0	0	0	0	0	0	0	0	0	0	0	0	0	0
15	PreTest, EntryTest, ExitTest, TestEvery2Days, Antigen	14	0	0	0	0	0	0	0	0	0	0	0	0	0	0	0	0
15	PreTest, EntryTest, ExitTest, TestEvery2Days, Antigen	15	0	0	0	0	0	0	0	0	0	0	0	0	0	0	0	0
15	PreTest, EntryTest, ExitTest, TestEvery2Days, Antigen	16	0	0	0	0	0	0	0	0	0	0	0	0	0	0	0	0
15	PreTest, EntryTest, ExitTest, TestEvery2Days, Antigen	17	0	0	0	0	0	0	0	0	0	0	0	0	0	0	0	0
15	PreTest, EntryTest, ExitTest, TestEvery2Days, Antigen	18	0	0	0	0	0	0	0	0	0	0	0	0	0	0	0	0
15	PreTest, EntryTest, ExitTest, TestEvery2Days, Antigen	19	0	0	0	0	0	0	0	0	0	0	0	0	0	0	0	0
15	PreTest, EntryTest, ExitTest, TestEvery2Days, Antigen	20	0	0	0	0	0	0	0	0	0	0	0	0	0	0	0	0
15	PreTest, EntryTest, ExitTest, TestEvery2Days, Antigen	21	0	0	0	0	0	0	0	0	0	0	0	0	0	0	0	0
16	PreTest, EntryTest, ExitTest, TestEvery2Days, PCR 1D	0	1349.77077117499	29.4867735909704	1291.97669493669	1407.5648474133	3517.96218569995	54.280137449293	3411.57311629934	3624.35125510056	4867.73295687494	66.6487994752236	4737.10130990351	4998.36460384638	0.264125646709069	0.00301179078932935	0.258222536761984	0.270028756656155
16	PreTest, EntryTest, ExitTest, TestEvery2Days, PCR 1D	1	1294.11679680609	28.6746654752312	1237.91445247464	1350.31914113755	3515.40612876511	54.2214272961629	3409.13213126463	3621.68012626559	4809.5229255712	66.412389649345	4679.35464185849	4939.69120928392	0.238074904767803	0.00292750740686265	0.232336990250352	0.243812819285254
16	PreTest, EntryTest, ExitTest, TestEvery2Days, PCR 1D	2	224.433677562914	12.1247195878867	200.669227170656	248.198127955172	620.849040856749	23.525516077371	574.739029345102	666.959052368397	845.282718419663	29.475100113865	787.511522196488	903.053914642839	0.0404571463810546	0.00135314121772444	0.0378049895943147	0.0431093031677944
16	PreTest, EntryTest, ExitTest, TestEvery2Days, PCR 1D	3	46.5367412628595	5.1737286171771	36.3962331731924	56.6772493525266	157.976827667992	11.6636711199878	135.116032272816	180.837623063168	204.513568930852	14.1627623447336	176.754554735174	232.272583126529	0.00986264061408626	0.000666172052184834	0.00855694339180398	0.0111683378363685
16	PreTest, EntryTest, ExitTest, TestEvery2Days, PCR 1D	4	0.799475150870733	0.677675703879488	-0.528769228733064	2.12771953047453	2.90637113057551	1.63860285006651	-0.305290455554855	6.11803271670588	3.70584628144624	1.98732679110617	-0.189314229121847	7.60100679201434	0.000191741055684468	9.5761283821547e-05	4.04893939423608e-06	0.0003794331719747
16	PreTest, EntryTest, ExitTest, TestEvery2Days, PCR 1D	5	0.183590742385961	0.305877959597749	-0.415930058425628	0.78311154319755	0.747824176700341	0.79369056941487	-0.807809339352804	2.30345769275349	0.931414919086302	0.950080562581008	-0.930742983572474	2.79357282174508	5.40614320881998e-05	4.88663380021529e-05	-4.17165903960198e-05	0.000149839454572419
16	PreTest, EntryTest, ExitTest, TestEvery2Days, PCR 1D	6	0.00119810278505685	0.028442663887004	-0.054549518433471	0.0569457240035847	0.00619111395430854	0.0752172235302457	-0.141234644164973	0.15361687207359	0.00738921673936539	0.0852243950772957	-0.159650597612134	0.174429031090865	1.66887604932775e-06	8.76760182245438e-06	-1.55156235226828e-05	1.88533756213383e-05
16	PreTest, EntryTest, ExitTest, TestEvery2Days, PCR 1D	7	0	0	0	0	0.00134479513666341	0.0374954569642228	-0.0721463005132132	0.07483589078654	0.00134479513666341	0.0374954569642228	-0.0721463005132132	0.07483589078654	2.71876028265952e-06	1.12665627994916e-05	-1.9363702804344e-05	2.4801223369663e-05
16	PreTest, EntryTest, ExitTest, TestEvery2Days, PCR 1D	8	0	0	0	0	1.38763989555844e-06	1.85541863917667e-05	-3.49785654323043e-05	3.77538452234211e-05	1.38763989555844e-06	1.85541863917667e-05	-3.49785654323043e-05	3.77538452234211e-05	1.42859781746474e-06	8.12759253543188e-06	-1.45014835519817e-05	1.73586791869112e-05
16	PreTest, EntryTest, ExitTest, TestEvery2Days, PCR 1D	9	0	0	0	0	2.86366415401054e-07	5.37939198268017e-06	-1.02572418706521e-05	1.08299747014542e-05	2.86366415401054e-07	5.37939198268017e-06	-1.02572418706521e-05	1.08299747014542e-05	1.14295730675736e-06	7.59849512968991e-06	-1.37500931474349e-05	1.60360077609496e-05
16	PreTest, EntryTest, ExitTest, TestEvery2Days, PCR 1D	10	0	0	0	0	5.50102077332655e-08	8.1909483605521e-07	-1.55041567093495e-06	1.66043608640148e-06	5.50102077332655e-08	8.1909483605521e-07	-1.55041567093495e-06	1.66043608640148e-06	3.8125010391515e-07	4.7543235002198e-06	-8.93722395651566e-06	9.69972416434595e-06
16	PreTest, EntryTest, ExitTest, TestEvery2Days, PCR 1D	11	0	0	0	0	6.88352336190957e-09	1.28038012651025e-07	-2.44070981434099e-07	2.57838028157918e-07	6.88352336190957e-09	1.28038012651025e-07	-2.44070981434099e-07	2.57838028157918e-07	1.42921186967894e-07	2.606763429705e-06	-4.96633513525391e-06	5.2521775091897e-06
16	PreTest, EntryTest, ExitTest, TestEvery2Days, PCR 1D	12	0	0	0	0	0	0	0	0	0	0	0	0	0	0	0	0
16	PreTest, EntryTest, ExitTest, TestEvery2Days, PCR 1D	13	0	0	0	0	0	0	0	0	0	0	0	0	0	0	0	0
16	PreTest, EntryTest, ExitTest, TestEvery2Days, PCR 1D	14	0	0	0	0	0	0	0	0	0	0	0	0	0	0	0	0
16	PreTest, EntryTest, ExitTest, TestEvery2Days, PCR 1D	15	0	0	0	0	0	0	0	0	0	0	0	0	0	0	0	0
16	PreTest, EntryTest, ExitTest, TestEvery2Days, PCR 1D	16	0	0	0	0	0	0	0	0	0	0	0	0	0	0	0	0
16	PreTest, EntryTest, ExitTest, TestEvery2Days, PCR 1D	17	0	0	0	0	0	0	0	0	0	0	0	0	0	0	0	0
16	PreTest, EntryTest, ExitTest, TestEvery2Days, PCR 1D	18	0	0	0	0	0	0	0	0	0	0	0	0	0	0	0	0
16	PreTest, EntryTest, ExitTest, TestEvery2Days, PCR 1D	19	0	0	0	0	0	0	0	0	0	0	0	0	0	0	0	0
16	PreTest, EntryTest, ExitTest, TestEvery2Days, PCR 1D	20	0	0	0	0	0	0	0	0	0	0	0	0	0	0	0	0
16	PreTest, EntryTest, ExitTest, TestEvery2Days, PCR 1D	21	0	0	0	0	0	0	0	0	0	0	0	0	0	0	0	0
17	PreTest, EntryTest, ExitTest, TestEvery2Days, PCR 2D	0	1460.18945071193	31.4195034219361	1398.60722400494	1521.77167741892	3814.81608887705	56.691209185817	3703.70131887285	3925.93085888126	5275.00553958898	70.2018081613593	5137.40999559272	5412.60108358525	0.265709016279262	0.00294206215293538	0.259942574459509	0.271475458099015
17	PreTest, EntryTest, ExitTest, TestEvery2Days, PCR 2D	1	1391.16920127848	30.3990594520162	1331.58704475253	1450.75135780443	3805.92964074538	56.580643798881	3695.03157889957	3916.82770259118	5197.09884202386	69.6867625043799	5060.51278751528	5333.68489653245	0.248458620888791	0.0028992409782684	0.242776108571385	0.254141133206198
17	PreTest, EntryTest, ExitTest, TestEvery2Days, PCR 2D	2	1041.36891174039	24.9086241056605	992.548008493299	1090.18981498749	3528.54265226122	53.7479706029048	3423.19662987952	3633.88867464291	4569.91156400161	65.483030306556	4441.56482460076	4698.25830340246	0.220462153064011	0.00282527737713086	0.214924609404835	0.225999696723188
17	PreTest, EntryTest, ExitTest, TestEvery2Days, PCR 2D	3	158.000650034388	9.21291663224875	139.943333435181	176.057966633596	616.365240793761	23.0915134454404	571.105874440698	661.624607146824	774.365890828149	27.9029525980059	719.676103736058	829.055677920241	0.037194158534265	0.00130956081147509	0.0346274193437738	0.0397608977247562
17	PreTest, EntryTest, ExitTest, TestEvery2Days, PCR 2D	4	24.7753231309257	3.45356301184994	18.0063396276998	31.5443066341515	118.108760049054	9.75831869768881	98.9824554015838	137.235064696524	142.88408317998	11.5724479090065	120.202085278327	165.566081081632	0.00793301732621193	0.000601456895497926	0.006754161811036	0.00911187284138786
17	PreTest, EntryTest, ExitTest, TestEvery2Days, PCR 2D	5	0.540116121818563	0.525236801254873	-0.489348008640988	1.56958025227811	2.34306876282893	1.40424763062952	-0.409256593204927	5.09539411886279	2.88318488464749	1.67281518019235	-0.395532868529516	6.1619026378245	0.000153693929864608	8.48842191411474e-05	-1.26791396520406e-05	0.000320066999381257
17	PreTest, EntryTest, ExitTest, TestEvery2Days, PCR 2D	6	0.104803584874066	0.237529754663292	-0.360754734265987	0.570361904014119	0.515641200440612	0.683212254875461	-0.823454819115292	1.85473721999652	0.620444785314678	0.813091852907912	-0.97321524638483	2.21410481701419	4.34688968931464e-05	4.73919672007564e-05	-4.94193588203361e-05	0.000136357152606629
17	PreTest, EntryTest, ExitTest, TestEvery2Days, PCR 2D	7	0.00137619243086148	0.0265307339856713	-0.0506240461810542	0.0533764310427771	0.00912711768237647	0.0937311505098766	-0.174585937316982	0.192840172681735	0.0105033101132379	0.104642794904642	-0.194596567899861	0.215603188126337	1.81092330621688e-06	9.36597321975866e-06	-1.65463842045101e-05	2.01682308169439e-05
17	PreTest, EntryTest, ExitTest, TestEvery2Days, PCR 2D	8	0.00114212172057839	0.0256329831291315	-0.0490985252125194	0.0513827686536762	0.00260679171260807	0.0447567898621161	-0.0851165164171394	0.0903300998423555	0.00374891343318645	0.0594383668111164	-0.112750285516602	0.120248112382975	3.19383815039543e-06	1.19245694613618e-05	-2.01783179938736e-05	2.65659942946645e-05
17	PreTest, EntryTest, ExitTest, TestEvery2Days, PCR 2D	9	0	0	0	0	1.21980177651896e-07	2.07064890926008e-06	-3.93649168449786e-06	4.18045203980166e-06	1.21980177651896e-07	2.07064890926008e-06	-3.93649168449786e-06	4.18045203980166e-06	4.29075685666735e-07	4.50478265467959e-06	-8.40029831750525e-06	9.25844968883872e-06
17	PreTest, EntryTest, ExitTest, TestEvery2Days, PCR 2D	10	0	0	0	0	0.000554251805164249	0.0175235640713434	-0.0337919337746688	0.0349004373849973	0.000554251805164249	0.0175235640713434	-0.0337919337746688	0.0349004373849973	6.18858572082625e-07	5.39513746719577e-06	-9.95561086362107e-06	1.11933280077863e-05
17	PreTest, EntryTest, ExitTest, TestEvery2Days, PCR 2D	11	0	0	0	0	5.29258863455888e-09	9.71462368996002e-08	-1.85114035688658e-07	1.95699212957775e-07	5.29258863455888e-09	9.71462368996002e-08	-1.85114035688658e-07	1.95699212957775e-07	1.42149621893336e-07	2.59269480724005e-06	-4.93953220029716e-06	5.22383144408383e-06
17	PreTest, EntryTest, ExitTest, TestEvery2Days, PCR 2D	12	0	0	0	0	0	0	0	0	0	0	0	0	0	0	0	0
17	PreTest, EntryTest, ExitTest, TestEvery2Days, PCR 2D	13	0	0	0	0	0	0	0	0	0	0	0	0	0	0	0	0
17	PreTest, EntryTest, ExitTest, TestEvery2Days, PCR 2D	14	0	0	0	0	0	0	0	0	0	0	0	0	0	0	0	0
17	PreTest, EntryTest, ExitTest, TestEvery2Days, PCR 2D	15	0	0	0	0	0	0	0	0	0	0	0	0	0	0	0	0
17	PreTest, EntryTest, ExitTest, TestEvery2Days, PCR 2D	16	0	0	0	0	0	0	0	0	0	0	0	0	0	0	0	0
17	PreTest, EntryTest, ExitTest, TestEvery2Days, PCR 2D	17	0	0	0	0	0	0	0	0	0	0	0	0	0	0	0	0
17	PreTest, EntryTest, ExitTest, TestEvery2Days, PCR 2D	18	0	0	0	0	0	0	0	0	0	0	0	0	0	0	0	0
17	PreTest, EntryTest, ExitTest, TestEvery2Days, PCR 2D	19	0	0	0	0	0	0	0	0	0	0	0	0	0	0	0	0
17	PreTest, EntryTest, ExitTest, TestEvery2Days, PCR 2D	20	0	0	0	0	0	0	0	0	0	0	0	0	0	0	0	0
17	PreTest, EntryTest, ExitTest, TestEvery2Days, PCR 2D	21	0	0	0	0	0	0	0	0	0	0	0	0	0	0	0	0
18	PreTest, EntryTest, ExitTest, TestEvery3Days, PCR 0D	0	1077.50752547889	26.7655180510294	1025.04711009887	1129.96794085891	2803.58542895075	49.0698401878045	2707.40854218265	2899.76231571885	3881.09295442964	61.3140425810043	3760.91743097087	4001.26847788841	0.240198129473613	0.00294004093062727	0.234435649249583	0.245960609697642
18	PreTest, EntryTest, ExitTest, TestEvery3Days, PCR 0D	1	226.76564819152	12.2692057809079	202.718004860941	250.8132915221	598.043067959365	23.2663858965852	552.440951602058	643.645184316672	824.808716150886	29.3048221538161	767.371264729406	882.246167572365	0.0498049642379575	0.00149502151054994	0.0468747220772796	0.0527352063986354
18	PreTest, EntryTest, ExitTest, TestEvery3Days, PCR 0D	2	55.9317861721528	6.03858961104663	44.0961505345014	67.7674218098042	153.663422560911	11.5566281636386	131.01243136018	176.314413761643	209.595208733064	14.2988861315947	181.569391915139	237.62102555099	0.0129339099075071	0.000775796287168506	0.0114133491846568	0.0144544706303573
18	PreTest, EntryTest, ExitTest, TestEvery3Days, PCR 0D	3	9.71806192807519	2.45977577525926	4.89690140856704	14.5392224475833	30.9411842972888	5.32030705848128	20.5133824626655	41.3689861319121	40.659246225364	6.546652519062	27.8278072880024	53.4906851627255	0.00252119215245616	0.000342422671352753	0.00185004371660477	0.00319234058830756
18	PreTest, EntryTest, ExitTest, TestEvery3Days, PCR 0D	4	0.0765084147746946	0.221727990497707	-0.358078446600811	0.5110952761502	0.320477238882303	0.524161525717692	-0.706879351524373	1.34783382928898	0.396985653656997	0.630658906960131	-0.839105803984858	1.63307711129885	8.71082369811754e-05	6.49635755042337e-05	-4.02203710071226e-05	0.000214436844969473
18	PreTest, EntryTest, ExitTest, TestEvery3Days, PCR 0D	5	0.026332930938896	0.119870975097748	-0.20861418025269	0.261280042130482	0.112320438173105	0.289082557473715	-0.454281374475376	0.678922250821586	0.138653369112001	0.346442976607242	-0.540374865038192	0.817681603262194	4.31870253891987e-05	4.28966320977083e-05	-4.08903735223096e-05	0.000127264424300707
18	PreTest, EntryTest, ExitTest, TestEvery3Days, PCR 0D	6	0.00362385646050065	0.0377214286009185	-0.0703101435972995	0.0775578565183008	0.0303019640207644	0.128512826587992	-0.2215831760917	0.282187104133229	0.033925820481265	0.149146509283284	-0.258401337713971	0.326252978676501	7.08573987291763e-05	5.84107344327271e-05	-4.36276407589688e-05	0.000185342438217321
18	PreTest, EntryTest, ExitTest, TestEvery3Days, PCR 0D	7	0.000306045902590488	0.00967802120747969	-0.0186628756640697	0.0192749674692507	0.00172604189597299	0.0364219480629653	-0.0696609763074389	0.0731130600993849	0.00203208779856348	0.0459722790904452	-0.088073579218709	0.092137754815836	4.60848600525364e-05	4.73632226825227e-05	-4.67470564052082e-05	0.000138916776510281
18	PreTest, EntryTest, ExitTest, TestEvery3Days, PCR 0D	8	0	0	0	0	0.000122850588828054	0.00103188613949749	-0.00189964624458702	0.00214534742224313	0.000122850588828054	0.00103188613949749	-0.00189964624458702	0.00214534742224313	6.51096146771461e-05	5.62294982972825e-05	-4.51002019855277e-05	0.00017531943133982
18	PreTest, EntryTest, ExitTest, TestEvery3Days, PCR 0D	9	0	0	0	0	2.02853373113666e-05	0.000119916055196804	-0.00021475013087437	0.000255320805497103	2.02853373113666e-05	0.000119916055196804	-0.00021475013087437	0.000255320805497103	5.19164713197276e-05	4.84815095922296e-05	-4.31072874810423e-05	0.000146940230120498
18	PreTest, EntryTest, ExitTest, TestEvery3Days, PCR 0D	10	0	0	0	0	2.60577353158241e-06	1.80709632122423e-05	-3.28133143644126e-05	3.80248614275774e-05	2.60577353158241e-06	1.80709632122423e-05	-3.28133143644126e-05	3.80248614275774e-05	1.56293430616554e-05	2.74788708713632e-05	-3.82292438462165e-05	6.94879299695273e-05
18	PreTest, EntryTest, ExitTest, TestEvery3Days, PCR 0D	11	0	0	0	0	4.2913135988067e-07	2.50793559657437e-06	-4.48642240940509e-06	5.34468512916643e-06	4.2913135988067e-07	2.50793559657437e-06	-4.48642240940509e-06	5.34468512916643e-06	3.86145746077879e-06	1.40215419599523e-05	-2.36207647807277e-05	3.13436797022852e-05
18	PreTest, EntryTest, ExitTest, TestEvery3Days, PCR 0D	12	0	0	0	0	5.56480592983804e-08	6.00506816552037e-07	-1.12134530114361e-06	1.23264141974037e-06	5.56480592983804e-08	6.00506816552037e-07	-1.12134530114361e-06	1.23264141974037e-06	7.15658397333849e-07	5.80226757093685e-06	-1.06567860417024e-05	1.20881028363701e-05
18	PreTest, EntryTest, ExitTest, TestEvery3Days, PCR 0D	13	0	0	0	0	6.67973468735048e-09	1.24628822060262e-07	-2.37592756550763e-07	2.50952225925464e-07	6.67973468735048e-09	1.24628822060262e-07	-2.37592756550763e-07	2.50952225925464e-07	1.43255076303073e-07	2.6128485192007e-06	-4.97792802133029e-06	5.26443817393644e-06
18	PreTest, EntryTest, ExitTest, TestEvery3Days, PCR 0D	14	0	0	0	0	0	0	0	0	0	0	0	0	0	0	0	0
18	PreTest, EntryTest, ExitTest, TestEvery3Days, PCR 0D	15	0	0	0	0	0	0	0	0	0	0	0	0	0	0	0	0
18	PreTest, EntryTest, ExitTest, TestEvery3Days, PCR 0D	16	0	0	0	0	0	0	0	0	0	0	0	0	0	0	0	0
18	PreTest, EntryTest, ExitTest, TestEvery3Days, PCR 0D	17	0	0	0	0	0	0	0	0	0	0	0	0	0	0	0	0
18	PreTest, EntryTest, ExitTest, TestEvery3Days, PCR 0D	18	0	0	0	0	0	0	0	0	0	0	0	0	0	0	0	0
18	PreTest, EntryTest, ExitTest, TestEvery3Days, PCR 0D	19	0	0	0	0	0	0	0	0	0	0	0	0	0	0	0	0
18	PreTest, EntryTest, ExitTest, TestEvery3Days, PCR 0D	20	0	0	0	0	0	0	0	0	0	0	0	0	0	0	0	0
18	PreTest, EntryTest, ExitTest, TestEvery3Days, PCR 0D	21	0	0	0	0	0	0	0	0	0	0	0	0	0	0	0	0
19	PreTest, EntryTest, ExitTest, TestEvery3Days, Antigen	0	1208.79356677019	28.1204915763827	1153.67740328048	1263.9097302599	3148.42244767314	51.0294034946172	3048.40481682369	3248.44007852259	4357.21601444333	63.7155353862864	4232.33356508621	4482.09846380045	0.277579642260142	0.00308627688919616	0.271530539557318	0.283628744962967
19	PreTest, EntryTest, ExitTest, TestEvery3Days, Antigen	1	372.382329950454	15.771728196248	341.469742685808	403.2949172151	983.649248770974	29.0858037669779	926.641073387697	1040.65742415425	1356.03157872143	37.1095484708608	1283.29686371854	1428.76629372431	0.0849666535396614	0.00192052640377986	0.0812024217882528	0.0887308852910699
19	PreTest, EntryTest, ExitTest, TestEvery3Days, Antigen	2	96.1766881828733	8.14852425229689	80.2055806483714	112.147795717375	266.330587633066	15.3595227554754	236.225923032335	296.435252233798	362.50727581594	19.0286006946506	325.211218454425	399.803333177455	0.0235657738141677	0.00104292798279145	0.0215216349678964	0.0256099126604389
19	PreTest, EntryTest, ExitTest, TestEvery3Days, Antigen	3	15.2057642843994	3.04039847142366	9.24658328040905	21.1649452883898	47.8338299568983	6.75447103221704	34.5950667337529	61.0725931800437	63.0395942412977	8.38101455540574	46.6128057127025	79.466382769893	0.00425234853905884	0.000464270712457635	0.00334237794264188	0.0051623191354758
19	PreTest, EntryTest, ExitTest, TestEvery3Days, Antigen	4	0.148630679477098	0.301332816430043	-0.441981640725786	0.739242999679982	0.563074515864655	0.694239273770824	-0.797634460726161	1.92378349245547	0.711705195341753	0.825441328328164	-0.906159808181448	2.32957019886495	0.000192302613787289	9.65797602795168e-05	3.0062836394363e-06	0.000381598943935142
19	PreTest, EntryTest, ExitTest, TestEvery3Days, Antigen	5	0.0438323564461738	0.168071039707373	-0.285586881380278	0.373251594272626	0.191002271555081	0.407060613660852	-0.60683653122019	0.988841074330351	0.234834628001255	0.488873781496522	-0.723357983731929	1.19302723973444	8.36393755199272e-05	6.56487795810663e-05	-4.50322324589627e-05	0.000212310983498817
19	PreTest, EntryTest, ExitTest, TestEvery3Days, Antigen	6	0.0126422563571443	0.0820775199363803	-0.148229682718161	0.17351419543245	0.0751188115605239	0.237730685975955	-0.390833332952348	0.541070956073396	0.0877610679176681	0.278675429454874	-0.458442773813885	0.633964909649221	0.000146751032135856	8.15612356255643e-05	-1.31089896902498e-05	0.000306611053961962
19	PreTest, EntryTest, ExitTest, TestEvery3Days, Antigen	7	0	0	0	0	0.000769120039335302	0.00252688712516624	-0.00418357872599052	0.00572181880466112	0.000769120039335302	0.00252688712516624	-0.00418357872599052	0.00572181880466112	0.000122483377828	7.67797454306088e-05	-2.80049232159929e-05	0.000272971678871994
19	PreTest, EntryTest, ExitTest, TestEvery3Days, Antigen	8	0	0	0	0	0.000252202018647526	0.00107374553983047	-0.0018523392394202	0.00235674327671526	0.000252202018647526	0.00107374553983047	-0.0018523392394202	0.00235674327671526	0.000167209396802563	8.75288592578246e-05	-4.34716734277289e-06	0.0003387659609479
19	PreTest, EntryTest, ExitTest, TestEvery3Days, Antigen	9	0	0	0	0	6.87119488957522e-05	0.000419619837035423	-0.000753742931693678	0.000891166829485182	6.87119488957522e-05	0.000419619837035423	-0.000753742931693678	0.000891166829485182	0.000118027195806404	7.75554616049696e-05	-3.39815089393369e-05	0.000270035900552144
19	PreTest, EntryTest, ExitTest, TestEvery3Days, Antigen	10	0	0	0	0	6.37096839390457e-06	2.52448301410001e-05	-4.31088986824555e-05	5.58508354702647e-05	6.37096839390457e-06	2.52448301410001e-05	-4.31088986824555e-05	5.58508354702647e-05	3.4905614053086e-05	4.23234056567586e-05	-4.80482610341608e-05	0.000117859489140333
19	PreTest, EntryTest, ExitTest, TestEvery3Days, Antigen	11	0	0	0	0	1.63001958262524e-06	1.68361718770967e-05	-3.13688772964843e-05	3.46289164617348e-05	1.63001958262524e-06	1.68361718770967e-05	-3.13688772964843e-05	3.46289164617348e-05	7.6727715936528e-06	1.85354895278196e-05	-2.86567878808735e-05	4.40023310681792e-05
19	PreTest, EntryTest, ExitTest, TestEvery3Days, Antigen	12	0	0	0	0	1.32362799584796e-07	9.98192243568855e-07	-1.82409399781016e-06	2.08881959697975e-06	1.32362799584796e-07	9.98192243568855e-07	-1.82409399781016e-06	2.08881959697975e-06	1.62037176324902e-06	8.64145457796076e-06	-1.53168792095541e-05	1.85576227360521e-05
19	PreTest, EntryTest, ExitTest, TestEvery3Days, Antigen	13	0	0	0	0	1.90191614121545e-08	2.94774469589379e-07	-5.58738798983028e-07	5.96777121807337e-07	1.90191614121545e-08	2.94774469589379e-07	-5.58738798983028e-07	5.96777121807337e-07	2.8685839626853e-07	3.69406958274624e-06	-6.9535179859141e-06	7.52723477845116e-06
19	PreTest, EntryTest, ExitTest, TestEvery3Days, Antigen	14	0	0	0	0	0	0	0	0	0	0	0	0	0	0	0	0
19	PreTest, EntryTest, ExitTest, TestEvery3Days, Antigen	15	0	0	0	0	0	0	0	0	0	0	0	0	0	0	0	0
19	PreTest, EntryTest, ExitTest, TestEvery3Days, Antigen	16	0	0	0	0	0	0	0	0	0	0	0	0	0	0	0	0
19	PreTest, EntryTest, ExitTest, TestEvery3Days, Antigen	17	0	0	0	0	0	0	0	0	0	0	0	0	0	0	0	0
19	PreTest, EntryTest, ExitTest, TestEvery3Days, Antigen	18	0	0	0	0	0	0	0	0	0	0	0	0	0	0	0	0
19	PreTest, EntryTest, ExitTest, TestEvery3Days, Antigen	19	0	0	0	0	0	0	0	0	0	0	0	0	0	0	0	0
19	PreTest, EntryTest, ExitTest, TestEvery3Days, Antigen	20	0	0	0	0	0	0	0	0	0	0	0	0	0	0	0	0
19	PreTest, EntryTest, ExitTest, TestEvery3Days, Antigen	21	0	0	0	0	0	0	0	0	0	0	0	0	0	0	0	0
20	PreTest, EntryTest, ExitTest, TestEvery3Days, PCR 1D	0	1349.77077117499	29.4867735909704	1291.97669493669	1407.5648474133	3517.96218569995	54.280137449293	3411.57311629934	3624.35125510056	4867.73295687494	66.6487994752236	4737.10130990351	4998.36460384638	0.264125646709069	0.00301179078932935	0.258222536761984	0.270028756656155
20	PreTest, EntryTest, ExitTest, TestEvery3Days, PCR 1D	1	1294.11679680609	28.6746654752312	1237.91445247464	1350.31914113755	3515.40612876511	54.2214272961629	3409.13213126463	3621.68012626559	4809.5229255712	66.412389649345	4679.35464185849	4939.69120928392	0.238074904767803	0.00292750740686265	0.232336990250352	0.243812819285254
20	PreTest, EntryTest, ExitTest, TestEvery3Days, PCR 1D	2	224.433677562914	12.1247195878867	200.669227170656	248.198127955172	620.849040856749	23.525516077371	574.739029345102	666.959052368397	845.282718419663	29.475100113865	787.511522196488	903.053914642839	0.0404571463810546	0.00135314121772444	0.0378049895943147	0.0431093031677944
20	PreTest, EntryTest, ExitTest, TestEvery3Days, PCR 1D	3	46.5367412628595	5.1737286171771	36.3962331731924	56.6772493525266	157.976827667992	11.6636711199878	135.116032272816	180.837623063168	204.513568930852	14.1627623447336	176.754554735174	232.272583126529	0.00986264061408626	0.000666172052184834	0.00855694339180398	0.0111683378363685
20	PreTest, EntryTest, ExitTest, TestEvery3Days, PCR 1D	4	6.67120013857737	1.82035835134778	3.10329776993572	10.239102507219	27.7407352427765	4.97782780746147	17.984192740152	37.497277745401	34.4119353813539	6.01556713558929	22.6214237955989	46.2024469671089	0.00183531442337092	0.000297294732015059	0.0012526167486214	0.00241801209812044
20	PreTest, EntryTest, ExitTest, TestEvery3Days, PCR 1D	5	0.0624089183785114	0.186062313058224	-0.302273215215607	0.42709105197263	0.295641209619092	0.525224467998633	-0.733798747658228	1.32508116689641	0.358050127997604	0.620267894305361	-0.857674944840905	1.57377520083611	3.52299056889655e-05	4.2054558691016e-05	-4.7197029345426e-05	0.000117656840723357
20	PreTest, EntryTest, ExitTest, TestEvery3Days, PCR 1D	6	0.0164061010231819	0.0917188039792635	-0.163362754776174	0.196174956822538	0.0730100548555801	0.244769284522731	-0.406737742808973	0.552757852520133	0.089416155878762	0.290422249492307	-0.479811453126159	0.658643764883683	4.19410704259473e-05	4.28969465213126e-05	-4.21369447558254e-05	0.00012601908560772
20	PreTest, EntryTest, ExitTest, TestEvery3Days, PCR 1D	7	0.00192130958614462	0.0313891005772894	-0.0596013275453425	0.0634439467176318	0.0138257793427482	0.104316766039083	-0.190635082093854	0.21828664077935	0.0157470889288929	0.117834350327185	-0.21520823771239	0.246702415570176	7.98215127744356e-05	6.20531250454725e-05	-4.18026123146906e-05	0.000201445637863562
20	PreTest, EntryTest, ExitTest, TestEvery3Days, PCR 1D	8	0.000306045862098716	0.00967801992701743	-0.0186628731948554	0.0192749649190529	0.00119319220672967	0.0350954533395334	-0.0675938963387559	0.0699802807522152	0.00149923806882838	0.0447712443395053	-0.086252400836602	0.0892508769742587	4.4365818989781e-05	4.65457705860472e-05	-4.68638913588715e-05	0.000135595529338434
20	PreTest, EntryTest, ExitTest, TestEvery3Days, PCR 1D	9	0	0	0	0	1.67531801056022e-05	0.000116870718962867	-0.000212313429061617	0.000245819789272821	1.67531801056022e-05	0.000116870718962867	-0.000212313429061617	0.000245819789272821	3.91343678105509e-05	4.2089508786e-05	-4.33610694100092e-05	0.000121629805031111
20	PreTest, EntryTest, ExitTest, TestEvery3Days, PCR 1D	10	0	0	0	0	2.6536702513051e-06	1.41255088862364e-05	-2.50323271657183e-05	3.03396676683285e-05	2.6536702513051e-06	1.41255088862364e-05	-2.50323271657183e-05	3.03396676683285e-05	1.74527625917813e-05	2.90212217552598e-05	-3.94288320485278e-05	7.43343572320905e-05
20	PreTest, EntryTest, ExitTest, TestEvery3Days, PCR 1D	11	0	0	0	0	2.65682647566306e-07	2.27078565843468e-06	-4.18505724296566e-06	4.71642253809827e-06	2.65682647566306e-07	2.27078565843468e-06	-4.18505724296566e-06	4.71642253809827e-06	2.76317114230909e-06	1.13445301833766e-05	-1.9472108017109e-05	2.49984503017272e-05
20	PreTest, EntryTest, ExitTest, TestEvery3Days, PCR 1D	12	0	0	0	0	3.41009322805595e-08	3.67720394774583e-07	-6.86631041477622e-07	7.54832906038741e-07	3.41009322805595e-08	3.67720394774583e-07	-6.86631041477622e-07	7.54832906038741e-07	5.25200677336157e-07	4.98249733035094e-06	-9.24049409015168e-06	1.0290895444824e-05
20	PreTest, EntryTest, ExitTest, TestEvery3Days, PCR 1D	13	0	0	0	0	4.97514175667102e-09	1.11229628693735e-07	-2.1303493048305e-07	2.22985213996392e-07	4.97514175667102e-09	1.11229628693735e-07	-2.1303493048305e-07	2.22985213996392e-07	9.54608739453717e-08	2.13350182401189e-06	-4.08620270111794e-06	4.27712444900868e-06
20	PreTest, EntryTest, ExitTest, TestEvery3Days, PCR 1D	14	0	0	0	0	0	0	0	0	0	0	0	0	0	0	0	0
20	PreTest, EntryTest, ExitTest, TestEvery3Days, PCR 1D	15	0	0	0	0	0	0	0	0	0	0	0	0	0	0	0	0
20	PreTest, EntryTest, ExitTest, TestEvery3Days, PCR 1D	16	0	0	0	0	0	0	0	0	0	0	0	0	0	0	0	0
20	PreTest, EntryTest, ExitTest, TestEvery3Days, PCR 1D	17	0	0	0	0	0	0	0	0	0	0	0	0	0	0	0	0
20	PreTest, EntryTest, ExitTest, TestEvery3Days, PCR 1D	18	0	0	0	0	0	0	0	0	0	0	0	0	0	0	0	0
20	PreTest, EntryTest, ExitTest, TestEvery3Days, PCR 1D	19	0	0	0	0	0	0	0	0	0	0	0	0	0	0	0	0
20	PreTest, EntryTest, ExitTest, TestEvery3Days, PCR 1D	20	0	0	0	0	0	0	0	0	0	0	0	0	0	0	0	0
20	PreTest, EntryTest, ExitTest, TestEvery3Days, PCR 1D	21	0	0	0	0	0	0	0	0	0	0	0	0	0	0	0	0
21	PreTest, EntryTest, ExitTest, TestEvery3Days, PCR 2D	0	1460.18945071193	31.4195034219361	1398.60722400494	1521.77167741892	3814.81608887705	56.691209185817	3703.70131887285	3925.93085888126	5275.00553958898	70.2018081613593	5137.40999559272	5412.60108358525	0.265709016279262	0.00294206215293538	0.259942574459509	0.271475458099015
21	PreTest, EntryTest, ExitTest, TestEvery3Days, PCR 2D	1	1391.16920127848	30.3990594520162	1331.58704475253	1450.75135780443	3805.92964074538	56.580643798881	3695.03157889957	3916.82770259118	5197.09884202386	69.6867625043799	5060.51278751528	5333.68489653245	0.248458620888791	0.0028992409782684	0.242776108571385	0.254141133206198
21	PreTest, EntryTest, ExitTest, TestEvery3Days, PCR 2D	2	1041.36891174039	24.9086241056605	992.548008493299	1090.18981498749	3528.54265226122	53.7479706029048	3423.19662987952	3633.88867464291	4569.91156400161	65.483030306556	4441.56482460076	4698.25830340246	0.220462153064011	0.00282527737713086	0.214924609404835	0.225999696723188
21	PreTest, EntryTest, ExitTest, TestEvery3Days, PCR 2D	3	158.000650034388	9.21291663224875	139.943333435181	176.057966633596	616.365240793761	23.0915134454404	571.105874440698	661.624607146824	774.365890828149	27.9029525980059	719.676103736058	829.055677920241	0.037194158534265	0.00130956081147509	0.0346274193437738	0.0397608977247562
21	PreTest, EntryTest, ExitTest, TestEvery3Days, PCR 2D	4	24.7753231309257	3.45356301184994	18.0063396276998	31.5443066341515	118.108760049054	9.75831869768881	98.9824554015838	137.235064696524	142.88408317998	11.5724479090065	120.202085278327	165.566081081632	0.00793301732621193	0.000601456895497926	0.006754161811036	0.00911187284138786
21	PreTest, EntryTest, ExitTest, TestEvery3Days, PCR 2D	5	3.06198205821943	1.18582611990265	0.737762863210226	5.38620125322863	16.5288896411584	3.49749795017267	9.67379365881996	23.3839856234968	19.5908716993778	4.10723683633031	11.5406875001704	27.6410558985852	0.00143216105313374	0.000254887301526275	0.000932581942142242	0.00193174016412524
21	PreTest, EntryTest, ExitTest, TestEvery3Days, PCR 2D	6	0.0527751133173822	0.166621453503447	-0.273802935549373	0.379353162184137	0.23104574896735	0.457215436831148	-0.6650965072217	1.1271880051564	0.283820862284732	0.54033907880033	-0.775243732163915	1.34288545673338	3.20866454292564e-05	3.92786889404623e-05	-4.48995848940498e-05	0.000109072875752562
21	PreTest, EntryTest, ExitTest, TestEvery3Days, PCR 2D	7	0.00643347426472922	0.0478306820656856	-0.0873146625840146	0.100181611113473	0.0541076503255273	0.21433451977037	-0.365988008424397	0.474203309075452	0.0605411245902565	0.239930725558819	-0.409723097505028	0.530805346685541	4.15251150169725e-05	4.54133074033719e-05	-4.74849674936364e-05	0.000130535197527581
21	PreTest, EntryTest, ExitTest, TestEvery3Days, PCR 2D	8	0.00278209967052572	0.0316628909846223	-0.0592771666593339	0.0648413660003853	0.0120900111863699	0.104949828473644	-0.193611652621972	0.217791674994711	0.0148721108568956	0.126292077166937	-0.232660360390301	0.262404582104092	7.40373428996089e-05	5.98001627122043e-05	-4.31709760163114e-05	0.000191245661815529
21	PreTest, EntryTest, ExitTest, TestEvery3Days, PCR 2D	9	0	0	0	0	4.40818527102405e-06	1.3166951043819e-05	-2.13990387748611e-05	3.02154093169092e-05	4.40818527102405e-06	1.3166951043819e-05	-2.13990387748611e-05	3.02154093169092e-05	2.27858589094091e-05	3.24008033062475e-05	-4.07197155708359e-05	8.62914333896542e-05
21	PreTest, EntryTest, ExitTest, TestEvery3Days, PCR 2D	10	0	0	0	0	2.27286973664421e-06	2.21654262408378e-05	-4.11713656953978e-05	4.57171051686862e-05	2.27286973664421e-06	2.21654262408378e-05	-4.11713656953978e-05	4.57171051686862e-05	1.01519181013724e-05	2.27641462368808e-05	-3.44658085229139e-05	5.47696447256587e-05
21	PreTest, EntryTest, ExitTest, TestEvery3Days, PCR 2D	11	0	0	0	0	3.89930882331938e-07	3.41896029975159e-06	-6.31123130518118e-06	7.09109306984505e-06	3.89930882331938e-07	3.41896029975159e-06	-6.31123130518118e-06	7.09109306984505e-06	2.91003004078783e-06	1.162104770637e-05	-1.98672234636974e-05	2.56872835452731e-05
21	PreTest, EntryTest, ExitTest, TestEvery3Days, PCR 2D	12	0	0	0	0	1.46469686319431e-08	1.81158952670064e-07	-3.40424578601382e-07	3.69718515865269e-07	1.46469686319431e-08	1.81158952670064e-07	-3.40424578601382e-07	3.69718515865269e-07	3.34485682565172e-07	3.98590570204122e-06	-7.47788949343563e-06	8.14686085856597e-06
21	PreTest, EntryTest, ExitTest, TestEvery3Days, PCR 2D	13	0	0	0	0	0	0	0	0	0	0	0	0	0	0	0	0
21	PreTest, EntryTest, ExitTest, TestEvery3Days, PCR 2D	14	0	0	0	0	1.20239678509109e-08	3.30261157081059e-07	-6.35287900027965e-07	6.59335835729786e-07	1.20239678509109e-08	3.30261157081059e-07	-6.35287900027965e-07	6.59335835729786e-07	9.56483480387865e-08	2.13769508767299e-06	-4.09423402380028e-06	4.28553071987786e-06
21	PreTest, EntryTest, ExitTest, TestEvery3Days, PCR 2D	15	0	0	0	0	0	0	0	0	0	0	0	0	0	0	0	0
21	PreTest, EntryTest, ExitTest, TestEvery3Days, PCR 2D	16	0	0	0	0	0	0	0	0	0	0	0	0	0	0	0	0
21	PreTest, EntryTest, ExitTest, TestEvery3Days, PCR 2D	17	0	0	0	0	0	0	0	0	0	0	0	0	0	0	0	0
21	PreTest, EntryTest, ExitTest, TestEvery3Days, PCR 2D	18	0	0	0	0	0	0	0	0	0	0	0	0	0	0	0	0
21	PreTest, EntryTest, ExitTest, TestEvery3Days, PCR 2D	19	0	0	0	0	0	0	0	0	0	0	0	0	0	0	0	0
21	PreTest, EntryTest, ExitTest, TestEvery3Days, PCR 2D	20	0	0	0	0	0	0	0	0	0	0	0	0	0	0	0	0
21	PreTest, EntryTest, ExitTest, TestEvery3Days, PCR 2D	21	0	0	0	0	0	0	0	0	0	0	0	0	0	0	0	0
