# Supplementary material for: Border Control for Infectious Respiratory Disease Pandemics: A Modelling Study for H1N1 and Four Strains of SARS-CoV-2
Source: Viruses. 2023 Apr 16;15(4):978. doi: 10.3390/v15040978 (PMC10144227; doi:10.3390/v15040978)
Supplement: Supplementary file 1 [file viruses-15-00978-s001.zip › Table S1.5 - Outcomes for Omicron (Vac).csv]

StrategyNo	StrategyDescription	QDays	TR_Sympt_Mean	TR_Sympt_SD	TR_Sympt_2_5th_Percentile	TR_Sympt_97_5th_Percentile	TR_NoSympt_Mean	TR_NoSympt_SD	TR_NoSympt_2_5th_Percentile	TR_NoSympt_97_5th_Percentile	TR_Total_Mean	TR_Total_SD	TR_Total_2_5th_Percentile	TR_Total_97_5th_Percentile	Missed_Proportion_Mean	Missed_Proportion_SD	Missed_Proportion_2_5th_Percentile	Missed_Proportion_97_5th_Percentile
1	Quarantine Only	0	1485.7848112338	22.9253958697672	1440.85103532906	1530.71858713855	5722.56339277899	53.1454488410819	5618.39831305047	5826.72847250751	7208.34820401279	61.3003647277453	7088.19948914641	7328.49691887917	0.942730538732033	0.00161593830240374	0.939563299659321	0.945897777804744
1	Quarantine Only	1	1050.54573327093	19.4682008384118	1012.38805962764	1088.70340691422	4356.04293405336	45.8535140771226	4266.1700464622	4445.91582164452	5406.5886673243	52.7112518685349	5303.27461366197	5509.90272098662	0.799760763053345	0.00276188101572935	0.794347476262516	0.805174049844175
1	Quarantine Only	2	615.54436731097	14.4987184354973	587.126879177395	643.961855444544	2989.22303981309	37.155884162712	2916.39750685418	3062.04857277201	3604.76740712406	42.8902800810485	3520.70245816521	3688.83235608292	0.656882256825855	0.00328548342599763	0.6504427093109	0.663321804340811
1	Quarantine Only	3	254.444243692069	8.44152895617948	237.898846937957	270.98964044618	1625.68728553631	26.775516453113	1573.20727328821	1678.16729778441	1880.13152922838	30.7752160722047	1819.81210572686	1940.4509527299	0.519554139225573	0.0035125473048365	0.512669546508093	0.526438731943053
1	Quarantine Only	4	69.0561539198308	4.22656336946287	60.7720897156835	77.340218123978	584.420597963051	15.6281962559673	553.789333301356	615.051862624747	653.476751882882	17.7673864533381	618.652674434339	688.300829331425	0.408498506293511	0.00342844971989231	0.401778744842522	0.4152182677445
1	Quarantine Only	5	14.5729844199607	1.82110258870656	11.0036233460958	18.1423454938255	157.242678085223	7.26757395863649	142.998233126295	171.48712304415	171.815662505183	8.14203698813172	155.857270008445	187.774055001921	0.332424992464127	0.00325650210935067	0.3260422483298	0.338807736598455
1	Quarantine Only	6	2.81951107837258	0.767918635089741	1.31439055359669	4.32463160314847	36.4568196886046	3.33631128363001	29.9176495726898	42.9959898045195	39.2763307669772	3.70804345202834	32.0085656010017	46.5440959329528	0.270641126648919	0.00310645902752994	0.264552466954961	0.276729786342878
1	Quarantine Only	7	0.538479161331926	0.334959766964939	-0.118041981919353	1.19500030458321	7.85158602348021	1.50415423706915	4.90344371882468	10.7997283281357	8.39006518481213	1.66862351487075	5.11956309566546	11.6605672739588	0.212443695894868	0.00281390664426413	0.20692843887211	0.217958952917626
1	Quarantine Only	8	0.11036833527785	0.154668308969274	-0.192781550301928	0.413518220857627	1.63573781609503	0.654805020509331	0.352319975896742	2.91915565629332	1.74610615137288	0.73207710814592	0.311235019406877	3.18097728333888	0.155041769914149	0.00243030819129318	0.150278365859214	0.159805173969083
1	Quarantine Only	9	0.0235418948304258	0.0744532963087126	-0.122386565934651	0.169470355595502	0.350144700839523	0.308103182889882	-0.253737537624647	0.954026939303693	0.373686595669949	0.344582286305843	-0.301694685489503	1.0490678768294	0.0987230285603903	0.00197634464244389	0.0948493930612003	0.10259666405958
1	Quarantine Only	10	0.00459594659613634	0.0319370021791197	-0.0580005776749384	0.067192470867211	0.0742889114110172	0.144668224517687	-0.20926080864365	0.357838631465684	0.0788848580071535	0.15976624020384	-0.234256972792373	0.39202668880668	0.0498146463653919	0.00144936588475667	0.0469738892312688	0.0526554034995149
1	Quarantine Only	11	0.00120079132282731	0.016001000187955	-0.0301611690455645	0.0325627516912192	0.0169907675989224	0.0735124221807448	-0.127093579875337	0.161075115073182	0.0181915589217498	0.0818571448243646	-0.142248444934005	0.178631562777504	0.0189570009130251	0.000914162357017912	0.01716524269327	0.0207487591327802
1	Quarantine Only	12	0.000311837492260865	0.00509581463149614	-0.00967595918547156	0.0102996341699933	0.00456581286489998	0.0407987867569808	-0.0753998091787824	0.0845314349085824	0.00487765035716085	0.0447182226298487	-0.0827700659973426	0.0925253667116643	0.00563885754611655	0.000503803564688733	0.00465140255932664	0.00662631253290647
1	Quarantine Only	13	0.000145657558084549	0.00336608562695929	-0.00645187027075567	0.00674318538692476	0.00167867757720041	0.0263525391874406	-0.0499722992301832	0.053329654384584	0.00182433513528496	0.0286930369448849	-0.0544140172766895	0.0580626875472594	0.001403411525144	0.000250327092069198	0.000912770424688375	0.00189405262559963
1	Quarantine Only	14	0	0	0	0	0.00047833265679473	0.0139143259272802	-0.0267937461606746	0.027750411474264	0.00047833265679473	0.0139143259272802	-0.0267937461606746	0.027750411474264	0.000319658952104276	0.000120372501122862	8.3728849903467e-05	0.000555589054305085
1	Quarantine Only	15	0	0	0	0	6.10695207808587e-05	0.00175153039478808	-0.00337193005300377	0.00349406909456549	6.10695207808587e-05	0.00175153039478808	-0.00337193005300377	0.00349406909456549	6.82846693870248e-05	5.56404839487139e-05	-4.07706791524544e-05	0.000177340017926504
1	Quarantine Only	16	0	0	0	0	5.89864782212041e-06	0.000155704724441465	-0.00029928261208315	0.000311079907727391	5.89864782212041e-06	0.000155704724441465	-0.00029928261208315	0.000311079907727391	1.57375758899315e-05	2.66147149623683e-05	-3.64272654363103e-05	6.79024172161734e-05
1	Quarantine Only	17	0	0	0	0	6.27529670153294e-07	1.34634576410317e-05	-2.57608473062688e-05	2.70159066465754e-05	6.27529670153294e-07	1.34634576410317e-05	-2.57608473062688e-05	2.70159066465754e-05	3.10218882016922e-06	1.17718458288531e-05	-1.99706290043828e-05	2.61750066447212e-05
1	Quarantine Only	18	0	0	0	0	9.64427030576875e-08	1.49112408460627e-06	-2.82616050277061e-06	3.01904590888598e-06	9.64427030576875e-08	1.49112408460627e-06	-2.82616050277061e-06	3.01904590888598e-06	8.11602609539873e-07	6.17487507162173e-06	-1.12911525308387e-05	1.29143577499185e-05
1	Quarantine Only	19	0	0	0	0	2.5267655304696e-08	4.49209654943284e-07	-8.5518326838414e-07	9.05718578993532e-07	2.5267655304696e-08	4.49209654943284e-07	-8.5518326838414e-07	9.05718578993532e-07	3.34199024813402e-07	3.982494421802e-06	-7.47149004191851e-06	8.13988809154532e-06
1	Quarantine Only	20	0	0	0	0	8.74170113170237e-09	1.95318397140119e-07	-3.74082357262931e-07	3.91565759526336e-07	8.74170113170237e-09	1.95318397140119e-07	-3.74082357262931e-07	3.91565759526336e-07	1.42740033561333e-07	2.60348180444044e-06	-4.96008430314193e-06	5.24556437026459e-06
1	Quarantine Only	21	0	0	0	0	3.43366369840424e-09	8.38017398951703e-08	-1.60817746496129e-07	1.67685073892938e-07	3.43366369840424e-09	8.38017398951703e-08	-1.60817746496129e-07	1.67685073892938e-07	9.48610715772284e-08	2.12009794524896e-06	-4.06053090111073e-06	4.25025304426519e-06
2	PreTest, EntryTest, PCR 0D	0	613.754128462959	15.9075528913377	582.575324795937	644.932932129981	1937.05923365283	31.6843974177086	1874.95781471412	1999.16065259154	2550.81336211579	37.8941764238425	2476.54077632506	2625.08594790652	0.286835974818403	0.00320159407351287	0.280560850434317	0.293111099202488
2	PreTest, EntryTest, PCR 0D	1	596.342273676109	15.6148460688351	565.737175381192	626.947371971026	1936.4702188837	31.6830557332413	1874.37142964654	1998.56900812085	2532.81249255981	37.8271978966753	2458.67118468232	2606.95380043729	0.245586869296815	0.00301469458957484	0.239678067901249	0.251495670692382
2	PreTest, EntryTest, PCR 0D	2	445.859827953255	12.6518671534254	421.062168332541	470.657487573968	1858.24335391925	30.9506970357714	1797.57998772914	1918.90672010936	2304.1031818725	36.2226452042836	2233.10679727211	2375.0995664729	0.205057419771134	0.00281520134722229	0.199539625130579	0.21057521441169
2	PreTest, EntryTest, PCR 0D	3	206.138991166395	7.52288007180344	191.394146225661	220.88383610713	1228.05622631571	24.1868592970958	1180.6499820934	1275.46247053801	1434.1952174821	27.6407684041774	1380.01931140991	1488.37112355429	0.148601124717776	0.00247828257000932	0.143743690880558	0.153458558554994
2	PreTest, EntryTest, PCR 0D	4	57.9709690124427	3.8738181577159	50.3782854233195	65.5636526015658	471.61808878796	13.9312454353901	444.312847734596	498.923329841325	529.589057800403	15.900628799431	498.423825353518	560.754290247288	0.103095211385435	0.00214344628781083	0.0988940566613262	0.107296366109545
2	PreTest, EntryTest, PCR 0D	5	12.3213268634556	1.6513654871364	9.0846505086683	15.558003218243	129.846059850011	6.68390084478885	116.745614194224	142.946505505797	142.167386713466	7.48644724278926	127.493950117599	156.840823309333	0.0864470006760204	0.00197335737296511	0.0825792202250088	0.090314781127032
2	PreTest, EntryTest, PCR 0D	6	2.37343823553723	0.712929880578909	0.976095669602568	3.77078080147189	30.3219325079366	3.04001409444542	24.3635048828235	36.2803601330496	32.6953707434738	3.39871620090524	26.0338869896995	39.3568544972481	0.0824114932932201	0.00193686230546872	0.0786152431745014	0.0862077434119388
2	PreTest, EntryTest, PCR 0D	7	0.450537010904195	0.310548765659926	-0.15813856978926	1.05921259159765	6.53054963911532	1.33377703580253	3.91634664894237	9.14475262928828	6.98108665001952	1.48001957054546	4.08024829175043	9.88192500828861	0.0813536761069684	0.00191532851413427	0.0775996322192652	0.0851077199946715
2	PreTest, EntryTest, PCR 0D	8	0.0885838613441245	0.141427577986567	-0.188614191509547	0.365781914197796	1.34826882477036	0.588579824655031	0.194652368446504	2.50188528109423	1.43685268611449	0.66030526170247	0.142654373177649	2.73105099905133	0.0777930541877779	0.00186191683355574	0.0741436971940087	0.0814424111815472
2	PreTest, EntryTest, PCR 0D	9	0.0177792614386979	0.0645140367443834	-0.108668250580294	0.144226773457689	0.287392642876405	0.276577533941887	-0.254699323649694	0.829484609402504	0.305171904315103	0.307784923805979	-0.298086546344615	0.908430354974821	0.0624171449332694	0.00164791292390998	0.0591872356024058	0.0656470542641329
2	PreTest, EntryTest, PCR 0D	10	0.00379229406251183	0.0310327877877614	-0.0570319700015006	0.0646165581265243	0.0609174143247362	0.13146031245171	-0.196744798080616	0.318579626730088	0.0647097083872481	0.145695668884247	-0.220853802625875	0.350273219400371	0.0362345771327787	0.00128521900279568	0.0337155478872992	0.0387536063782582
2	PreTest, EntryTest, PCR 0D	11	0.000930369103238243	0.0154363472736465	-0.0293248715531089	0.0311856097595854	0.0138464324814244	0.0682684254381986	-0.119959681377445	0.147652546340294	0.0147768015846626	0.075833439261602	-0.133856739368077	0.163410342537403	0.014800804618806	0.000805995528028285	0.0132210533838706	0.0163805558537415
2	PreTest, EntryTest, PCR 0D	12	0.000311837492260865	0.00509581463149614	-0.00967595918547156	0.0102996341699933	0.00431364328776052	0.0407362349691829	-0.075529377251838	0.084156663827359	0.00462548078002138	0.0446621503014821	-0.0829123338108836	0.0921632953709263	0.00454124570417326	0.00045687807496059	0.00364576467725051	0.00543672673109602
2	PreTest, EntryTest, PCR 0D	13	0.000145657558084549	0.00336608562695929	-0.00645187027075567	0.00674318538692476	0.00164133233059395	0.0263515429093592	-0.05000769177175	0.0532903564329379	0.0017869898886785	0.0286921895435619	-0.0544497016167028	0.0580236813940598	0.00114428256232137	0.000226676155373693	0.000699997297788932	0.00158856782685381
2	PreTest, EntryTest, PCR 0D	14	0	0	0	0	0.000472312857601758	0.0139142364378456	-0.0267995905605756	0.0277442162757791	0.000472312857601758	0.0139142364378456	-0.0267995905605756	0.0277442162757791	0.000260598618734906	0.00010957546909661	4.58306993055514e-05	0.000475366538164261
2	PreTest, EntryTest, PCR 0D	15	0	0	0	0	5.99644162749731e-05	0.00175147403802023	-0.00337292469824469	0.00349285353079463	5.99644162749731e-05	0.00175147403802023	-0.00337292469824469	0.00349285353079463	5.45059511083368e-05	4.93787440890589e-05	-4.22763873062187e-05	0.000151288289522892
2	PreTest, EntryTest, PCR 0D	16	0	0	0	0	5.65926994234966e-06	0.000155667357908318	-0.000299448751557953	0.000310767291442653	5.65926994234966e-06	0.000155667357908318	-0.000299448751557953	0.000310767291442653	1.24949296784646e-05	2.37349499478489e-05	-3.40255722193193e-05	5.90154315762485e-05
2	PreTest, EntryTest, PCR 0D	17	0	0	0	0	5.65668552040864e-07	1.34287837029231e-05	-2.57547475056883e-05	2.68860846097701e-05	5.65668552040864e-07	1.34287837029231e-05	-2.57547475056883e-05	2.68860846097701e-05	2.05396097523986e-06	9.69482703454107e-06	-1.69479000124606e-05	2.10558219629403e-05
2	PreTest, EntryTest, PCR 0D	18	0	0	0	0	7.86601011416327e-08	1.43144659345221e-06	-2.72697522202469e-06	2.88429542430796e-06	7.86601011416327e-08	1.43144659345221e-06	-2.72697522202469e-06	2.88429542430796e-06	5.74214717788809e-07	5.2130456352712e-06	-9.64335472734274e-06	1.07917841629204e-05
2	PreTest, EntryTest, PCR 0D	19	0	0	0	0	1.89869576722664e-08	4.11097526104325e-07	-7.86764193492211e-07	8.24738108836743e-07	1.89869576722664e-08	4.11097526104325e-07	-7.86764193492211e-07	8.24738108836743e-07	2.38608889000896e-07	3.36772589075149e-06	-6.36213385687202e-06	6.83935163487381e-06
2	PreTest, EntryTest, PCR 0D	20	0	0	0	0	6.30075373102602e-09	1.79504435755243e-07	-3.4552794034925e-07	3.58129447811302e-07	6.30075373102602e-09	1.79504435755243e-07	-3.4552794034925e-07	3.58129447811302e-07	9.52476323455271e-08	2.12876618408023e-06	-4.07713408845172e-06	4.26762935314278e-06
2	PreTest, EntryTest, PCR 0D	21	0	0	0	0	2.46931963228318e-09	7.8086743089843e-08	-1.50580696823809e-07	1.55519336088376e-07	2.46931963228318e-09	7.8086743089843e-08	-1.50580696823809e-07	1.55519336088376e-07	4.7368670361423e-08	1.49792888075808e-06	-2.88857193592441e-06	2.98330927664726e-06
3	PreTest, EntryTest, Antigen	0	682.71177593753	16.693394667501	649.992722389228	715.430829485832	2156.8825731119	32.344475096857	2093.48740192206	2220.27774430174	2839.59434904943	38.9212903832861	2763.30861989819	2915.88007820067	0.327999614044697	0.00330032068527374	0.321530985501561	0.334468242587834
3	PreTest, EntryTest, Antigen	1	660.001086351511	16.3056498596747	628.042012626549	691.960160076474	2156.20177190788	32.3395877029	2092.81618001019	2219.58736380556	2816.20285825939	38.8178900315518	2740.11979379755	2892.28592272123	0.280752304730044	0.00307189434778705	0.274731391808381	0.286773217651707
3	PreTest, EntryTest, Antigen	2	486.098729831675	13.1986823204242	460.229312483643	511.968147179706	2053.84145960165	31.5803557605159	1991.94396231104	2115.73895689227	2539.94018943333	37.1062715335578	2467.21189722756	2612.6684816391	0.231112240644872	0.00286364854814824	0.225499489490502	0.236724991799243
3	PreTest, EntryTest, Antigen	3	221.710267839571	7.84204145192027	206.339866593807	237.080669085335	1330.86574925845	24.7468233151996	1282.36197556066	1379.36952295624	1552.57601709802	28.3223460410654	1497.06421885753	1608.08781533851	0.164724800894207	0.00252756200615777	0.159770779362138	0.169678822426277
3	PreTest, EntryTest, Antigen	4	62.0108589536981	4.01448985067437	54.1424588463764	69.8792590610199	506.89571781104	14.5685508646501	478.341358116326	535.450077505754	568.906576764738	16.6044996109612	536.361757527254	601.451396002222	0.11421935592389	0.002212300368376	0.109883247201873	0.118555464645907
3	PreTest, EntryTest, Antigen	5	13.1793168002363	1.74344373516961	9.76216707930382	16.5964665211687	139.276956902223	6.96475828380706	125.626030665961	152.927883138485	152.456273702459	7.81669521439907	137.135551082237	167.776996322681	0.0961006836589677	0.00204416677202098	0.0920941167858066	0.100107250532129
3	PreTest, EntryTest, Antigen	6	2.53967657449772	0.744642014035669	1.08017822698781	3.99917492200763	32.5319952183835	3.16596019714897	26.3267132319715	38.7372772047955	35.0716717928812	3.53555110166054	28.1419916336265	42.0013519521358	0.0917372774890718	0.00201251704296806	0.0877927440848544	0.0956818108932891
3	PreTest, EntryTest, Antigen	7	0.482118577918868	0.321988986211985	-0.148979835056623	1.11321699089436	7.01537722022566	1.39545479247243	4.2802858269797	9.75046861347162	7.49749579814453	1.5477977041006	4.46381229810735	10.5311792981817	0.0905488825749956	0.00199520668299855	0.0866382774763184	0.0944594876736727
3	PreTest, EntryTest, Antigen	8	0.0958506521937644	0.145379517348132	-0.189093201808575	0.380794506196104	1.45702294191775	0.620932791431417	0.239994670712172	2.67405121312333	1.55287359411151	0.693700520449031	0.193220574031413	2.91252661419161	0.0862182758233235	0.00194937456204314	0.0823975016817189	0.090039049964928
3	PreTest, EntryTest, Antigen	9	0.019086520419023	0.0651833144904062	-0.108672775982173	0.146845816820219	0.310723120200682	0.288823021180356	-0.255370001312816	0.87681624171418	0.329809640619705	0.320098521292504	-0.297583461113603	0.957202742353013	0.0684106228185505	0.00171318874427504	0.0650527728797715	0.0717684727573296
3	PreTest, EntryTest, Antigen	10	0.00416290312748444	0.0314827911979963	-0.0575433676205884	0.0658691738755573	0.0662642353120404	0.138547421036272	-0.205288709919052	0.337817180543133	0.0704271384395249	0.153136595911084	-0.2297205895462	0.37057486642525	0.0392691233083511	0.00134366615022903	0.0366355376539022	0.0419027089628
3	PreTest, EntryTest, Antigen	11	0.001060544311199	0.015700404375645	-0.0297122482650652	0.0318333368874632	0.0150275380156355	0.0702723358631734	-0.122706240276184	0.152761316307455	0.0160880823268345	0.0782700699799579	-0.137321254833883	0.169497419487552	0.0159272746727122	0.000848731389029637	0.0142637611502141	0.0175907881952103
3	PreTest, EntryTest, Antigen	12	0.000311837492260865	0.00509581463149614	-0.00967595918547156	0.0102996341699933	0.00437463813179445	0.0407423366606209	-0.0754803417230225	0.0842296179866114	0.00468647562405532	0.0446676249841555	-0.0828620693448894	0.0922350205930001	0.0048702880276378	0.00046895649162873	0.00395113330404549	0.00578944275123011
3	PreTest, EntryTest, Antigen	13	0.000145657558084549	0.00336608562695929	-0.00645187027075567	0.00674318538692476	0.00164977616312212	0.0263520624669739	-0.0500002662721468	0.053299818598391	0.00179543372120667	0.0286926832186757	-0.0544422253873978	0.0580330928298111	0.00122530431987607	0.000236339601603587	0.000762078700733042	0.0016885299390191
3	PreTest, EntryTest, Antigen	14	0	0	0	0	0.000473508517294883	0.0139144138080981	-0.0267987425465773	0.0277457595811671	0.000473508517294883	0.0139144138080981	-0.0267987425465773	0.0277457595811671	0.000279041038697651	0.000113642742197022	5.63012639914884e-05	0.000501780813403813
3	PreTest, EntryTest, Antigen	15	0	0	0	0	6.0138612210102e-05	0.00175153839218216	-0.00337287663646693	0.00349315386088713	6.0138612210102e-05	0.00175153839218216	-0.00337287663646693	0.00349315386088713	5.87001057001674e-05	5.15297646377472e-05	-4.22982329898171e-05	0.000159698444390152
3	PreTest, EntryTest, Antigen	16	0	0	0	0	5.68485352308457e-06	0.000155689894082002	-0.00029946733887764	0.000310837045923809	5.68485352308457e-06	0.000155689894082002	-0.00029946733887764	0.000310837045923809	1.34491659163587e-05	2.43553037249735e-05	-3.42872293845892e-05	6.11855612173067e-05
3	PreTest, EntryTest, Antigen	17	0	0	0	0	5.69073121574558e-07	1.34286882224019e-05	-2.57511557943332e-05	2.68893020374823e-05	5.69073121574558e-07	1.34286882224019e-05	-2.57511557943332e-05	2.68893020374823e-05	2.33975879267649e-06	1.03131311748868e-05	-1.78739783101017e-05	2.25534958954546e-05
3	PreTest, EntryTest, Antigen	18	0	0	0	0	7.81193992645105e-08	1.4313740093214e-06	-2.72737365900543e-06	2.88361245753446e-06	7.81193992645105e-08	1.4313740093214e-06	-2.72737365900543e-06	2.88361245753446e-06	5.26308231250531e-07	4.99312437027186e-06	-9.26021553448231e-06	1.03128319969834e-05
3	PreTest, EntryTest, Antigen	19	0	0	0	0	1.89869576722664e-08	4.11097526104325e-07	-7.86764193492211e-07	8.24738108836743e-07	1.89869576722664e-08	4.11097526104325e-07	-7.86764193492211e-07	8.24738108836743e-07	2.38608889000896e-07	3.36772589075149e-06	-6.36213385687202e-06	6.83935163487381e-06
3	PreTest, EntryTest, Antigen	20	0	0	0	0	6.30075373102602e-09	1.79504435755243e-07	-3.4552794034925e-07	3.58129447811302e-07	6.30075373102602e-09	1.79504435755243e-07	-3.4552794034925e-07	3.58129447811302e-07	9.52476323455271e-08	2.12876618408023e-06	-4.07713408845172e-06	4.26762935314278e-06
3	PreTest, EntryTest, Antigen	21	0	0	0	0	2.46931963228318e-09	7.8086743089843e-08	-1.50580696823809e-07	1.55519336088376e-07	2.46931963228318e-09	7.8086743089843e-08	-1.50580696823809e-07	1.55519336088376e-07	4.7368670361423e-08	1.49792888075808e-06	-2.88857193592441e-06	2.98330927664726e-06
4	PreTest, EntryTest, PCR 1D	0	750.542868125345	17.4597267075669	716.321803778514	784.763932472176	2373.90435157309	33.9971260832853	2307.26998444985	2440.53871869633	3124.44721969844	40.66178530436	3044.75012050189	3204.14431889498	0.306563975125608	0.00311442846544893	0.300459695333328	0.312668254917888
4	PreTest, EntryTest, PCR 1D	1	702.128082027735	16.5074877101641	669.773406115813	734.482757939657	2370.92020060046	33.9434264288121	2304.39108479998	2437.44931640093	3073.04828262819	40.164632695747	2994.32560254453	3151.77096271185	0.272069373441276	0.00301443958732605	0.266161071850117	0.277977675032435
4	PreTest, EntryTest, PCR 1D	2	493.555288815367	13.200423173488	467.68245939533	519.428118235403	2152.35773432037	32.1289158156694	2089.38505932166	2215.33040931909	2645.91302313574	37.4864410338833	2572.43959870933	2719.38644756215	0.230289825442658	0.00289785652454861	0.224610026654543	0.235969624230774
4	PreTest, EntryTest, PCR 1D	3	218.694101194326	7.74763328857005	203.508739948728	233.879462439923	1333.82830737965	24.6660949150016	1285.48276134625	1382.17385341305	1552.52240857398	28.1971852793659	1497.25592542642	1607.78889172153	0.168822269280389	0.00258062265972075	0.163764248867337	0.173880289693442
4	PreTest, EntryTest, PCR 1D	4	60.5968710851604	3.95517604757409	52.8447260319152	68.3490161384056	499.841702867718	14.3977789363288	471.622056152513	528.061349582922	560.438573952878	16.4019200569791	528.290810641199	592.586337264557	0.12181520417016	0.00228218599763666	0.117342119614793	0.126288288725528
4	PreTest, EntryTest, PCR 1D	5	12.8450011085376	1.70797862245224	9.49736300853122	16.192639208544	136.441100677689	6.84604166700699	123.022859010355	149.859342345023	149.286101786226	7.66984260893323	134.253210272717	164.318993299736	0.104901624155873	0.00212896499658827	0.10072885276256	0.109074395549186
4	PreTest, EntryTest, PCR 1D	6	2.47652237993006	0.732687208194194	1.04045545186944	3.91258930799068	31.7792518435998	3.12678119968584	25.6507606922155	37.9077429949841	34.2557742235299	3.49032476503231	27.4147376840665	41.0968107629932	0.100810433758516	0.00209752484264424	0.096699285066933	0.104921582450098
4	PreTest, EntryTest, PCR 1D	7	0.47126877953628	0.318153452294553	-0.152311986961044	1.0948495460336	6.83577231555491	1.37127141456692	4.14808034300374	9.52346428810608	7.30704109509119	1.51943651593435	4.32894552385986	10.2851366663225	0.0992338555856805	0.00207981536301337	0.0951574174741743	0.103310293697187
4	PreTest, EntryTest, PCR 1D	8	0.0939694853363234	0.144894448187036	-0.190023633110267	0.377962603782914	1.41918343431656	0.61259192894592	0.218503253582559	2.61986361505056	1.51315291965288	0.685487885448261	0.169596664174293	2.85670917513148	0.0924377112565231	0.00199441988218597	0.0885286482874386	0.0963467742256076
4	PreTest, EntryTest, PCR 1D	9	0.0189173693843185	0.0651093132997332	-0.108696884683158	0.146531623451795	0.304300787196682	0.28520770909466	-0.254706322628851	0.863307897022215	0.323218156581	0.316677502411576	-0.297469748145688	0.943906061307689	0.0708659628831037	0.00173906983291129	0.0674573860105976	0.0742745397556098
4	PreTest, EntryTest, PCR 1D	10	0.00416290312748444	0.0314827911979963	-0.0575433676205884	0.0658691738755573	0.0646503451902338	0.135380680752348	-0.200695789084367	0.329996479464835	0.0688132483177183	0.150315218944925	-0.225804580814334	0.363431077449771	0.0396110936505846	0.00133259460244828	0.036999208229786	0.0422229790713832
4	PreTest, EntryTest, PCR 1D	11	0.001060544311199	0.015700404375645	-0.0297122482650652	0.0318333368874632	0.0147799222887128	0.0701295619351786	-0.122674019104237	0.152233863681663	0.0158404665999118	0.0781444073211753	-0.137322571749592	0.169003504949415	0.0158221781595106	0.00084144011663719	0.0141729555309017	0.0174714007881195
4	PreTest, EntryTest, PCR 1D	12	0.000311837492260865	0.00509581463149614	-0.00967595918547156	0.0102996341699933	0.00434240737143798	0.0407376562934407	-0.0755033989637057	0.0841882137065817	0.00465424486369884	0.0446633574660332	-0.0828859357697261	0.0921944254971238	0.00479954507749548	0.00046580200554717	0.00388657314662302	0.00571251700836793
4	PreTest, EntryTest, PCR 1D	13	0.000145657558084549	0.00336608562695929	-0.00645187027075567	0.00674318538692476	0.00164549931470158	0.0263514420156821	-0.0500033270360354	0.0532943256654386	0.00179115687278613	0.0286920868899986	-0.0544453334316111	0.0580276471771834	0.00120229085928235	0.000231862839185226	0.000747839694479308	0.00165674202408539
4	PreTest, EntryTest, PCR 1D	14	0	0	0	0	0.000472932408195339	0.0139142179974618	-0.0267989348668298	0.0277447996832205	0.000472932408195339	0.0139142179974618	-0.0267989348668298	0.0277447996832205	0.000273516164413241	0.000112409443774144	5.31936546159195e-05	0.000493838674210563
4	PreTest, EntryTest, PCR 1D	15	0	0	0	0	6.00600559561191e-05	0.00175147116907729	-0.00337282343543537	0.00349294354734761	6.00600559561191e-05	0.00175147116907729	-0.00337282343543537	0.00349294354734761	5.74142010441633e-05	5.08318706758039e-05	-4.22162654804123e-05	0.000157044667568739
4	PreTest, EntryTest, PCR 1D	16	0	0	0	0	5.67355149424663e-06	0.000155666933174958	-0.000299433637528671	0.000310780740517165	5.67355149424663e-06	0.000155666933174958	-0.000299433637528671	0.000310780740517165	1.30677859589763e-05	2.41891484554085e-05	-3.43429450136245e-05	6.0478516931577e-05
4	PreTest, EntryTest, PCR 1D	17	0	0	0	0	5.68011937384625e-07	1.34287563379885e-05	-2.57523504850729e-05	2.68883743598422e-05	5.68011937384625e-07	1.34287563379885e-05	-2.57523504850729e-05	2.68883743598422e-05	2.19671172951685e-06	1.00091225497337e-05	-1.74211684679612e-05	2.18145919269949e-05
4	PreTest, EntryTest, PCR 1D	18	0	0	0	0	7.86601011416327e-08	1.43144659345221e-06	-2.72697522202469e-06	2.88429542430796e-06	7.86601011416327e-08	1.43144659345221e-06	-2.72697522202469e-06	2.88429542430796e-06	5.74214717788809e-07	5.2130456352712e-06	-9.64335472734274e-06	1.07917841629204e-05
4	PreTest, EntryTest, PCR 1D	19	0	0	0	0	1.89869576722664e-08	4.11097526104325e-07	-7.86764193492211e-07	8.24738108836743e-07	1.89869576722664e-08	4.11097526104325e-07	-7.86764193492211e-07	8.24738108836743e-07	2.38608889000896e-07	3.36772589075149e-06	-6.36213385687202e-06	6.83935163487381e-06
4	PreTest, EntryTest, PCR 1D	20	0	0	0	0	6.30075373102602e-09	1.79504435755243e-07	-3.4552794034925e-07	3.58129447811302e-07	6.30075373102602e-09	1.79504435755243e-07	-3.4552794034925e-07	3.58129447811302e-07	9.52476323455271e-08	2.12876618408023e-06	-4.07713408845172e-06	4.26762935314278e-06
4	PreTest, EntryTest, PCR 1D	21	0	0	0	0	2.46931963228318e-09	7.8086743089843e-08	-1.50580696823809e-07	1.55519336088376e-07	2.46931963228318e-09	7.8086743089843e-08	-1.50580696823809e-07	1.55519336088376e-07	4.7368670361423e-08	1.49792888075808e-06	-2.88857193592441e-06	2.98330927664726e-06
5	PreTest, EntryTest, PCR 2D	0	805.852802087825	18.5675765570012	769.460352036102	842.245252139547	2552.97885571239	35.9400208680957	2482.53641481092	2623.42129661386	3358.83165780021	42.9403449813738	3274.66858163672	3442.99473396371	0.302665569076643	0.00308828524612507	0.296612529994238	0.308718608159048
5	PreTest, EntryTest, PCR 2D	1	747.979223312643	17.3863113612711	713.902053044551	782.056393580734	2543.30889765119	35.8192887727405	2473.10309165661	2613.51470364576	3291.28812096383	42.2821642994333	3208.41507893694	3374.16116299072	0.277935649169363	0.00305328615069401	0.271951208314002	0.283920090024723
5	PreTest, EntryTest, PCR 2D	2	523.544726096448	13.8598283721234	496.379462487086	550.70998970581	2286.33960633688	33.3628741860897	2220.94837293215	2351.73083974162	2809.88433243333	39.1703744815445	2733.1103984495	2886.65826641716	0.240738403110744	0.00297520290143481	0.234907005423932	0.246569800797556
5	PreTest, EntryTest, PCR 2D	3	232.156025947882	8.289194958066	215.909203830072	248.402848065691	1415.65882468068	25.1817311051554	1366.30263171458	1465.01501764678	1647.81485062856	29.1338755741204	1590.71245450329	1704.91724675384	0.179299212254831	0.00269392848702811	0.174019112420256	0.184579312089406
5	PreTest, EntryTest, PCR 2D	4	64.385108461359	4.12017704771168	56.3095614478441	72.4606554748739	531.093946382496	15.05657002577	501.583069131987	560.604823633005	595.479054843855	17.1283863985539	561.907417502689	629.050692185021	0.130656531849141	0.00233738838927183	0.126075250606168	0.135237813092114
5	PreTest, EntryTest, PCR 2D	5	13.6668699573558	1.75166906912153	10.2335985818776	17.100141332834	145.110682585762	7.08709904046289	131.219968466455	159.001396705069	158.777552543118	7.90449017236607	143.28475180528	174.270353280955	0.112967950278408	0.00217532940272891	0.10870430464906	0.117231595907757
5	PreTest, EntryTest, PCR 2D	6	2.64305369606599	0.743171405757069	1.18643774078213	4.09966965134984	33.8318531632475	3.26846587963322	27.4256600391663	40.2380462873286	36.4749068593134	3.62906288513778	29.3619436044434	43.5878701141835	0.108556027472941	0.00211991143741905	0.1044010010556	0.112711053890283
5	PreTest, EntryTest, PCR 2D	7	0.504369608204394	0.324738505393259	-0.132117862366395	1.14085707877518	7.30418920434263	1.44892190280319	4.46430227484838	10.1440761338369	7.80855881254702	1.60694955685245	4.65893768111621	10.9581799439778	0.106549088402582	0.00209287877045827	0.102447046012484	0.11065113079268
5	PreTest, EntryTest, PCR 2D	8	0.102177586664394	0.149279374260391	-0.190409986885972	0.394765160214759	1.51956332879718	0.626798998455442	0.291037291824514	2.74808936576985	1.62174091546157	0.700889570231638	0.247997357807562	2.99548447311558	0.0986214557820584	0.00200618793503006	0.0946893274293995	0.102553584134717
5	PreTest, EntryTest, PCR 2D	9	0.0209263844807339	0.0671756888965007	-0.110737965756407	0.152590734717875	0.326478857031579	0.298980655332128	-0.259523227419393	0.912480941482551	0.347405241512313	0.331598838963524	-0.302528482856194	0.99733896588082	0.0752504397867588	0.00177671887443576	0.0717680707928647	0.0787328087806528
5	PreTest, EntryTest, PCR 2D	10	0.00423215487895441	0.0314575998734796	-0.0574247408730655	0.0658890506309743	0.0690057204815285	0.139749002693288	-0.204902324797316	0.342913765760373	0.0732378753604829	0.154246799735578	-0.22908585212125	0.375561602842216	0.0420437023288967	0.00138074122341094	0.0393374495310113	0.0447499551267822
5	PreTest, EntryTest, PCR 2D	11	0.00110882676674014	0.0157409871707927	-0.0297435080880135	0.0319611616214938	0.0154736160800865	0.0688684839169018	-0.119508612397041	0.150455844557214	0.0165824428468267	0.0768580599847271	-0.134059354723238	0.167224240416892	0.0167937390491345	0.000872783857780663	0.0150830826878844	0.0185043954103846
5	PreTest, EntryTest, PCR 2D	12	0.000219872936173692	0.00418931124383428	-0.0079911771017415	0.00843092297408888	0.00382114108126248	0.0357595259269163	-0.0662675297354935	0.0739098118980185	0.00404101401743618	0.0386295509694961	-0.0716729058827762	0.0797549339176485	0.00510219399182129	0.000480365296590654	0.0041606780105036	0.00604370997313897
5	PreTest, EntryTest, PCR 2D	13	5.36930019973762e-05	0.00169792180723679	-0.00327423374018673	0.00338161974418148	0.00123372500851448	0.0226195276931071	-0.0431005492699754	0.0455679992870044	0.00128741801051186	0.0235253839626727	-0.0448223345563267	0.0473971705773504	0.0012808854327165	0.000241472482862825	0.000807599366305364	0.00175417149912764
5	PreTest, EntryTest, PCR 2D	14	0	0	0	0	0.000476096113059811	0.0139143645917191	-0.0267960584867097	0.0277482507128293	0.000476096113059811	0.0139143645917191	-0.0267960584867097	0.0277482507128293	0.000290855948947403	0.000115177976329817	6.5107115340962e-05	0.000516604782553844
5	PreTest, EntryTest, PCR 2D	15	0	0	0	0	6.07500917652241e-05	0.00175153670743126	-0.00337226185480004	0.00349376203833049	6.07500917652241e-05	0.00175153670743126	-0.00337226185480004	0.00349376203833049	6.16539190469327e-05	5.37124707302486e-05	-4.36225235843545e-05	0.00016693036167822
5	PreTest, EntryTest, PCR 2D	16	0	0	0	0	5.85120005747022e-06	0.000155705731112546	-0.000299332032923119	0.00031103443303806	5.85120005747022e-06	0.000155705731112546	-0.000299332032923119	0.00031103443303806	1.42109568516271e-05	2.51210829488291e-05	-3.50263657280779e-05	6.34482794313321e-05
5	PreTest, EntryTest, PCR 2D	17	0	0	0	0	6.20772792383188e-07	1.34634922305845e-05	-2.57676719795624e-05	2.70092175643287e-05	6.20772792383188e-07	1.34634922305845e-05	-2.57676719795624e-05	2.70092175643287e-05	2.76756583087095e-06	1.11593058825672e-05	-1.91046736989607e-05	2.46398053607026e-05
5	PreTest, EntryTest, PCR 2D	18	0	0	0	0	9.59020011805653e-08	1.49106086051834e-06	-2.82657728543538e-06	3.01838128779651e-06	9.59020011805653e-08	1.49106086051834e-06	-2.82657728543538e-06	3.01838128779651e-06	7.63696123001596e-07	5.99226968176554e-06	-1.09811524532589e-05	1.25085446992621e-05
5	PreTest, EntryTest, PCR 2D	19	0	0	0	0	2.5267655304696e-08	4.49209654943284e-07	-8.5518326838414e-07	9.05718578993532e-07	2.5267655304696e-08	4.49209654943284e-07	-8.5518326838414e-07	9.05718578993532e-07	3.34199024813402e-07	3.982494421802e-06	-7.47149004191851e-06	8.13988809154532e-06
5	PreTest, EntryTest, PCR 2D	20	0	0	0	0	8.74170113170237e-09	1.95318397140119e-07	-3.74082357262931e-07	3.91565759526336e-07	8.74170113170237e-09	1.95318397140119e-07	-3.74082357262931e-07	3.91565759526336e-07	1.42740033561333e-07	2.60348180444044e-06	-4.96008430314193e-06	5.24556437026459e-06
5	PreTest, EntryTest, PCR 2D	21	0	0	0	0	3.43366369840424e-09	8.38017398951703e-08	-1.60817746496129e-07	1.67685073892938e-07	3.43366369840424e-09	8.38017398951703e-08	-1.60817746496129e-07	1.67685073892938e-07	9.48610715772284e-08	2.12009794524896e-06	-4.06053090111073e-06	4.25025304426519e-06
6	PreTest, EntryTest, ExitTest, PCR 0D	0	613.754128462959	15.9075528913377	582.575324795937	644.932932129981	1937.05923365283	31.6843974177086	1874.95781471412	1999.16065259154	2550.81336211579	37.8941764238425	2476.54077632506	2625.08594790652	0.286835974818403	0.00320159407351287	0.280560850434317	0.293111099202488
6	PreTest, EntryTest, ExitTest, PCR 0D	1	271.81694796401	10.5416441654767	251.155325399676	292.478570528344	865.45010280912	20.5598501029893	825.152796607261	905.747409010979	1137.26705077313	25.1589746075527	1087.95546054233	1186.57864100393	0.121513655859643	0.00228174661253637	0.117041432499072	0.125985879220214
6	PreTest, EntryTest, ExitTest, PCR 0D	2	67.6009830995713	5.24916952330607	57.3126108338914	77.8893553652512	227.259243863049	10.9136083963474	205.868571406208	248.64991631989	294.86022696262	12.9279015218215	269.52153997985	320.19891394539	0.0371032565122963	0.0012641040064293	0.0346256126596949	0.0395809003648978
6	PreTest, EntryTest, ExitTest, PCR 0D	3	11.7820476814009	2.05393486616602	7.75633534371546	15.8077600190863	47.7823775201086	5.17911569246734	37.6313107628726	57.9334442773446	59.5644252015095	6.09419975408911	47.6197936834948	71.5090567195241	0.00985893043995937	0.00067173065464829	0.00854233835684873	0.01117552252307
6	PreTest, EntryTest, ExitTest, PCR 0D	4	1.97728034606083	0.821589725240992	0.366964484588489	3.58759620753318	12.136749093315	2.26897399839747	7.68956005645601	16.5839381301741	14.1140294393759	2.61583414577089	8.98699451366493	19.2410643650868	0.00521913427825112	0.000493659284385247	0.00425156208085604	0.00618670647564621
6	PreTest, EntryTest, ExitTest, PCR 0D	5	0.327823911933443	0.317080740608161	-0.293654339658553	0.949302163525439	3.53266198950015	1.03165747867042	1.51061333130612	5.55471064769419	3.8604859014336	1.15367942405571	1.59927423028441	6.12169757258278	0.00797145181452117	0.000592747947004813	0.00680966583839173	0.0091332377906506
6	PreTest, EntryTest, ExitTest, PCR 0D	6	0.0532502064131672	0.118383022870767	-0.178780518413536	0.285280931239871	1.01960887439024	0.408053484877717	0.21982404402991	1.81939370475056	1.0728590808034	0.45639557076454	0.178323762104903	1.9673943995019	0.0156488955613588	0.00086467470441438	0.0139541331407067	0.017343657982011
6	PreTest, EntryTest, ExitTest, PCR 0D	7	0.0123219190881429	0.0591653838880308	-0.103642233332397	0.128286071508683	0.311408762902555	0.20050712258985	-0.0815851973735504	0.70440272317866	0.323730681990698	0.223794908530612	-0.114907338729302	0.762368702710698	0.02771602160123	0.00113262458602214	0.0254960774126266	0.0299359657898334
6	PreTest, EntryTest, ExitTest, PCR 0D	8	0.00090693128043404	0.0153293467740125	-0.0291385883966305	0.0309524509574986	0.0840727758412294	0.0784791413194428	-0.0697463411448786	0.237891892827337	0.0849797071216634	0.0830204119427251	-0.0777403002860777	0.247699714529404	0.0395458423429892	0.0013347250029984	0.0369297813371123	0.0421619033488661
6	PreTest, EntryTest, ExitTest, PCR 0D	9	0.00063872551069249	0.0157207178515766	-0.0301738814783977	0.0314513324997827	0.0244154426419194	0.0451402472956577	-0.0640594420575697	0.112890327341409	0.0250541681526119	0.0510016991036435	-0.0749091620905293	0.125017498395753	0.0396819816536868	0.00135069488175706	0.0370346196854429	0.0423293436219306
6	PreTest, EntryTest, ExitTest, PCR 0D	10	0	0	0	0	0.00535110210585526	0.00529567873243641	-0.00502842820972011	0.0157306324214306	0.00535110210585526	0.00529567873243641	-0.00502842820972011	0.0157306324214306	0.0255709060479514	0.00109193795548115	0.0234307076552083	0.0277111044406944
6	PreTest, EntryTest, ExitTest, PCR 0D	11	3.59243955743017e-05	0.00113602913579666	-0.00219069271058715	0.00226254150173575	0.00167649702032537	0.0111229177073493	-0.0201244216860793	0.02347741572673	0.00171242141589967	0.0122341027149971	-0.0222664199054946	0.025691262737294	0.0109959726487185	0.000709421156918159	0.00960550718115893	0.0123864381162781
6	PreTest, EntryTest, ExitTest, PCR 0D	12	6.1991403722756e-05	0.0019603403111495	-0.00378027560613027	0.00390425841357578	0.000647855587619222	0.0119770298554575	-0.0228271229290775	0.0241228341043159	0.000709846991341978	0.0139363913288189	-0.026605480013143	0.0280251739958269	0.00346907302659564	0.000398597481706574	0.00268782196245075	0.00425032409074052
6	PreTest, EntryTest, ExitTest, PCR 0D	13	0	0	0	0	5.53229995770296e-05	0.000140174444675979	-0.00021941891198789	0.000330064911141949	5.53229995770296e-05	0.000140174444675979	-0.00021941891198789	0.000330064911141949	0.000884782177222887	0.000205725275114842	0.000481560637997797	0.00128800371644798
6	PreTest, EntryTest, ExitTest, PCR 0D	14	0	0	0	0	1.27361055455372e-05	5.91322336115067e-05	-0.000103163072333016	0.00012863528342409	1.27361055455372e-05	5.91322336115067e-05	-0.000103163072333016	0.00012863528342409	0.000204871338162038	9.78255252200688e-05	1.31333087307028e-05	0.000396609367593373
6	PreTest, EntryTest, ExitTest, PCR 0D	15	0	0	0	0	1.85540614725548e-06	6.91580178974153e-06	-1.16995653606379e-05	1.54103776551489e-05	1.85540614725548e-06	6.91580178974153e-06	-1.16995653606379e-05	1.54103776551489e-05	4.2295569279367e-05	4.44580300827944e-05	-4.484216968291e-05	0.000129433308241644
6	PreTest, EntryTest, ExitTest, PCR 0D	16	0	0	0	0	5.36494609935834e-06	0.000155583655041895	-0.000299579017782757	0.000310308909981473	5.36494609935834e-06	0.000155583655041895	-0.000299579017782757	0.000310308909981473	9.8704058713682e-06	2.09107093794522e-05	-3.11145845123582e-05	5.08553962550946e-05
6	PreTest, EntryTest, ExitTest, PCR 0D	17	0	0	0	0	3.48744010513058e-08	2.4290302026921e-07	-4.41215518676346e-07	5.10964320778957e-07	3.48744010513058e-08	2.4290302026921e-07	-4.41215518676346e-07	5.10964320778957e-07	1.43289697921134e-06	8.15201295537498e-06	-1.45450484133236e-05	1.74108423717463e-05
6	PreTest, EntryTest, ExitTest, PCR 0D	18	0	0	0	0	3.71896731865364e-08	8.7251774722621e-07	-1.67294511137683e-06	1.74732445774991e-06	3.71896731865364e-08	8.7251774722621e-07	-1.67294511137683e-06	1.74732445774991e-06	4.31273439839005e-07	4.52793018003552e-06	-8.44346971303061e-06	9.30601659270862e-06
6	PreTest, EntryTest, ExitTest, PCR 0D	19	0	0	0	0	1.5970731329576e-08	3.99999992173717e-07	-7.68029253330909e-07	7.99970715990061e-07	1.5970731329576e-08	3.99999992173717e-07	-7.68029253330909e-07	7.99970715990061e-07	1.91037412857991e-07	3.01607798147475e-06	-5.72047543083252e-06	6.1025502565485e-06
6	PreTest, EntryTest, ExitTest, PCR 0D	20	0	0	0	0	6.62448880078938e-10	2.09484729447719e-08	-4.03965580916739e-08	4.17214558518318e-08	6.62448880078938e-10	2.09484729447719e-08	-4.03965580916739e-08	4.17214558518318e-08	4.78789619841042e-08	1.51406571874384e-06	-2.91968984675382e-06	3.01544777072203e-06
6	PreTest, EntryTest, ExitTest, PCR 0D	21	0	0	0	0	2.46931963228318e-09	7.8086743089843e-08	-1.50580696823809e-07	1.55519336088376e-07	2.46931963228318e-09	7.8086743089843e-08	-1.50580696823809e-07	1.55519336088376e-07	4.7368670361423e-08	1.49792888075808e-06	-2.88857193592441e-06	2.98330927664726e-06
7	PreTest, EntryTest, ExitTest, Antigen	0	682.71177593753	16.693394667501	649.992722389228	715.430829485832	2156.8825731119	32.344475096857	2093.48740192206	2220.27774430174	2839.59434904943	38.9212903832861	2763.30861989819	2915.88007820067	0.327999614044697	0.00330032068527374	0.321530985501561	0.334468242587834
7	PreTest, EntryTest, ExitTest, Antigen	1	360.252904752087	12.5004349906863	335.752052170342	384.753757333832	1146.20103187617	23.8377456908856	1099.47905032204	1192.92301343031	1506.45393662826	29.5733566258987	1448.4901576415	1564.41771561502	0.166357788278347	0.00255634091428086	0.161347360086357	0.171368216470338
7	PreTest, EntryTest, ExitTest, Antigen	2	95.7493570578221	6.23699149427608	83.524853729041	107.973860386603	319.206243491318	12.6348121281946	294.442011720057	343.97047526258	414.95560054914	15.1194717249312	385.321435968275	444.589765130005	0.0542484524715225	0.00150096176720733	0.0513065674077962	0.0571903375352489
7	PreTest, EntryTest, ExitTest, Antigen	3	15.5888166433759	2.39642569855282	10.8918222742123	20.2858110125394	61.7111832571566	5.95495200724685	50.0394773229528	73.3828891913605	77.2999999005325	6.96314565542042	63.6522344159085	90.9477653851565	0.0139118016695261	0.000802232038722589	0.0123394268736298	0.0154841764654223
7	PreTest, EntryTest, ExitTest, Antigen	4	2.43414275580776	0.929143187511516	0.613022108285186	4.25526340333033	14.4238617871537	2.47142341499126	9.5798718937708	19.2678516805365	16.8580045429614	2.8715820793635	11.229703667409	22.4863054185139	0.0071347168444875	0.000573554563235637	0.00601054990054565	0.00825888378842935
7	PreTest, EntryTest, ExitTest, Antigen	5	0.380500083928183	0.347933975636179	-0.301450508318727	1.06245067617509	4.1863674710772	1.10146555705127	2.02749497925672	6.34523996289769	4.56686755500539	1.24462497049326	2.12740261283859	7.00633249717218	0.0117841321259777	0.000724333141626841	0.0103644391683891	0.0132038250835663
7	PreTest, EntryTest, ExitTest, Antigen	6	0.0638806638569201	0.134218684844561	-0.199187958438419	0.326949286152259	1.28251917308239	0.445320667622962	0.409690664541386	2.1553476816234	1.34639983693931	0.498456653488902	0.369424796101063	2.32337487777756	0.0239881451669552	0.00106258211201992	0.0219054842273961	0.0260708061065142
7	PreTest, EntryTest, ExitTest, Antigen	7	0.0137796443715242	0.0616905233936933	-0.107133781480115	0.134693070223163	0.412178117722584	0.217619465187578	-0.0143560340450685	0.838712269490236	0.425957762094108	0.241185990255455	-0.0467667788065844	0.8986823029948	0.0413664160394544	0.0013787156424486	0.0386641333802552	0.0440686986986537
7	PreTest, EntryTest, ExitTest, Antigen	8	0.00090693128043404	0.0153293467740125	-0.0291385883966305	0.0309524509574986	0.11335297510646	0.076029636320854	-0.035665112082414	0.262371062295334	0.114259906386894	0.0807862125624351	-0.044081070235479	0.272600883009267	0.0554889508981283	0.00154912715509161	0.0524526616741487	0.0585252401221079
7	PreTest, EntryTest, ExitTest, Antigen	9	0.00063872551069249	0.0157207178515766	-0.0301738814783977	0.0314513324997827	0.0327233304630575	0.0454699904074001	-0.0563978507354468	0.121844511661562	0.03336205597375	0.0512858020755734	-0.0671581160943739	0.133882228041874	0.0524200030757725	0.00151979873921622	0.0494411975469087	0.0553988086046363
7	PreTest, EntryTest, ExitTest, Antigen	10	0	0	0	0	0.00730581925088574	0.00548486890320884	-0.00344452379940359	0.0180561623011751	0.00730581925088574	0.00548486890320884	-0.00344452379940359	0.0180561623011751	0.0324997574512536	0.00122089134821351	0.0301068104087551	0.0348927044937521
7	PreTest, EntryTest, ExitTest, Antigen	11	3.59243955743017e-05	0.00113602913579666	-0.00219069271058715	0.00226254150173575	0.00210647235986362	0.0111293484800878	-0.0197070506611085	0.0239199953808357	0.00214239675543792	0.0122400921293396	-0.0218481838180677	0.0261329773289436	0.0136718660156321	0.000799642686682688	0.0121045663497341	0.0152391656815302
7	PreTest, EntryTest, ExitTest, Antigen	12	6.1991403722756e-05	0.0019603403111495	-0.00378027560613027	0.00390425841357578	0.000740019382580149	0.0119775423568382	-0.0227359636368228	0.0242160024019831	0.000802010786302905	0.0139366457893275	-0.026513814960779	0.0281178365333848	0.00426925774126457	0.000436798498821072	0.00341313268357527	0.00512538279895387
7	PreTest, EntryTest, ExitTest, Antigen	13	0	0	0	0	7.39516154319884e-05	0.000154612939857282	-0.000229089746688285	0.000376992977552262	7.39516154319884e-05	0.000154612939857282	-0.000229089746688285	0.000376992977552262	0.00108801233538027	0.000224947387373442	0.000647115456128327	0.00152890921463222
7	PreTest, EntryTest, ExitTest, Antigen	14	0	0	0	0	1.69807878112697e-05	7.19805589707982e-05	-0.000124101107771495	0.000158062683394034	1.69807878112697e-05	7.19805589707982e-05	-0.000124101107771495	0.000158062683394034	0.000248201879446747	0.00010747373626531	3.75533563667384e-05	0.000458850402526755
7	PreTest, EntryTest, ExitTest, Antigen	15	0	0	0	0	2.89579469371896e-06	1.27743317114588e-05	-2.21418954607402e-05	2.79334848481782e-05	2.89579469371896e-06	1.27743317114588e-05	-2.21418954607402e-05	2.79334848481782e-05	5.24571762977304e-05	4.90435948241388e-05	-4.36682695575817e-05	0.000148582622153042
7	PreTest, EntryTest, ExitTest, Antigen	16	0	0	0	0	5.31378559004368e-06	0.000155558638947507	-0.00029958114674707	0.000310208717927157	5.31378559004368e-06	0.000155558638947507	-0.00029958114674707	0.000310208717927157	1.19212248341733e-05	2.29566845997776e-05	-3.30738769813907e-05	5.69163266497374e-05
7	PreTest, EntryTest, ExitTest, Antigen	17	0	0	0	0	1.03905368832627e-07	1.88054573596015e-06	-3.58196427364926e-06	3.78977501131452e-06	1.03905368832627e-07	1.88054573596015e-06	-3.58196427364926e-06	3.78977501131452e-06	2.00419872214767e-06	9.57689691649969e-06	-1.67665192341917e-05	2.07749166784871e-05
7	PreTest, EntryTest, ExitTest, Antigen	18	0	0	0	0	7.54025142196543e-08	1.4289367446708e-06	-2.7253135053351e-06	2.87611853377441e-06	7.54025142196543e-08	1.4289367446708e-06	-2.7253135053351e-06	2.87611853377441e-06	4.78611961098857e-07	4.76466772221553e-06	-8.86013677444358e-06	9.8173606966413e-06
7	PreTest, EntryTest, ExitTest, Antigen	19	0	0	0	0	1.89869576722664e-08	4.11097526104325e-07	-7.86764193492211e-07	8.24738108836743e-07	1.89869576722664e-08	4.11097526104325e-07	-7.86764193492211e-07	8.24738108836743e-07	2.38608889000896e-07	3.36772589075149e-06	-6.36213385687202e-06	6.83935163487381e-06
7	PreTest, EntryTest, ExitTest, Antigen	20	0	0	0	0	6.62448880078938e-10	2.09484729447719e-08	-4.03965580916739e-08	4.17214558518318e-08	6.62448880078938e-10	2.09484729447719e-08	-4.03965580916739e-08	4.17214558518318e-08	4.78789619841042e-08	1.51406571874384e-06	-2.91968984675382e-06	3.01544777072203e-06
7	PreTest, EntryTest, ExitTest, Antigen	21	0	0	0	0	2.46931963228318e-09	7.8086743089843e-08	-1.50580696823809e-07	1.55519336088376e-07	2.46931963228318e-09	7.8086743089843e-08	-1.50580696823809e-07	1.55519336088376e-07	4.7368670361423e-08	1.49792888075808e-06	-2.88857193592441e-06	2.98330927664726e-06
8	PreTest, EntryTest, ExitTest, PCR 1D	0	750.542868125345	17.4597267075669	716.321803778514	784.763932472176	2373.90435157309	33.9971260832853	2307.26998444985	2440.53871869633	3124.44721969844	40.66178530436	3044.75012050189	3204.14431889498	0.306563975125608	0.00311442846544893	0.300459695333328	0.312668254917888
8	PreTest, EntryTest, ExitTest, PCR 1D	1	702.128082027735	16.5074877101641	669.773406115813	734.482757939657	2370.92020060046	33.9434264288121	2304.39108479998	2437.44931640093	3073.04828262819	40.164632695747	2994.32560254453	3151.77096271185	0.272069373441276	0.00301443958732605	0.266161071850117	0.277977675032435
8	PreTest, EntryTest, ExitTest, PCR 1D	2	250.001474121705	9.53656273300255	231.30981116502	268.69313707839	914.023221151857	21.0623115483031	872.741090517183	955.305351786531	1164.02469527356	25.1964293270579	1114.63969379253	1213.4096967546	0.0993326521955573	0.00203308946309858	0.0953477968478841	0.103317507543231
8	PreTest, EntryTest, ExitTest, PCR 1D	3	50.3068628857055	4.13790551954817	42.1965680673911	58.41715770402	227.614098633013	10.8874911880901	206.274615904357	248.95358136167	277.920961518719	12.764163494968	252.903201068581	302.938721968856	0.0252463407668189	0.00110472392770492	0.0230810818685172	0.0274115996651205
8	PreTest, EntryTest, ExitTest, PCR 1D	4	7.13460499396728	1.44701891957673	4.29844791159689	9.97076207633767	38.9119808056876	4.70405724427215	29.6920286069142	48.131933004461	46.0465857996549	5.45859847774856	35.3477327832677	56.7454388160421	0.00626228410755232	0.000554396614029602	0.0051756667440543	0.00734890147105034
8	PreTest, EntryTest, ExitTest, PCR 1D	5	1.01739423758856	0.543356422294583	-0.047584350108822	2.08237282528594	6.59067646100957	1.75635164586966	3.14822723510503	10.0331256869141	7.60807069859813	2.00962283136366	3.66920994912536	11.5469314480709	0.00564251238600409	0.000509288436299224	0.00464430705085761	0.00664071772115057
8	PreTest, EntryTest, ExitTest, PCR 1D	6	0.146267528718237	0.193998810798817	-0.233970140447445	0.526505197883919	1.25610469687976	0.725933462657574	-0.166724889929083	2.67893428368861	1.402372225598	0.809902863715452	-0.185037387284287	2.98978183848028	0.0110051246858571	0.000686341275403464	0.00965989578606629	0.0123503535856479
8	PreTest, EntryTest, ExitTest, PCR 1D	7	0.019951411032758	0.0679962736690205	-0.113321285358522	0.153224107424038	0.263669338390271	0.265172700792987	-0.256069155163984	0.783407831944526	0.283620749423029	0.295323134313698	-0.295212593831818	0.862454092677876	0.0211107573859726	0.00101026521893786	0.0191306375568544	0.0230908772150908
8	PreTest, EntryTest, ExitTest, PCR 1D	8	0.00416515590462815	0.032165343149837	-0.0588789166690523	0.0672092284783086	0.0683032447361222	0.127664645921967	-0.181919461270934	0.318525950743178	0.0724684006407504	0.142265429297175	-0.206371840781713	0.351308642063213	0.0317901717444236	0.00118084851927341	0.0294757086466477	0.0341046348421995
8	PreTest, EntryTest, ExitTest, PCR 1D	9	0.000615568226350817	0.0147140566740511	-0.0282239828547894	0.029455119307491	0.0160535354982135	0.0420745941304562	-0.0664126689974807	0.0985197399939077	0.0166691037245643	0.0471796576136286	-0.0758030251981478	0.109141232647276	0.0323864403846752	0.00117168035749464	0.0300899468839857	0.0346829338853647
8	PreTest, EntryTest, ExitTest, PCR 1D	10	0.000153956040793474	0.00350556881689182	-0.00671695884031449	0.00702487092190143	0.00526867374368561	0.0327227413725503	-0.058867899346513	0.0694052468338842	0.00542262978447908	0.0358814782316517	-0.0649050675495582	0.0757503271185163	0.021213769673148	0.000999921341647859	0.0192539238435182	0.0231736155027778
8	PreTest, EntryTest, ExitTest, PCR 1D	11	0	0	0	0	0.00082391426859244	0.000656081044051376	-0.000462004577748258	0.00210983311493314	0.00082391426859244	0.000656081044051376	-0.000462004577748258	0.00210983311493314	0.00923247800910446	0.000639835817184911	0.00797839980742204	0.0104865562107869
8	PreTest, EntryTest, ExitTest, PCR 1D	12	0	0	0	0	0.000195268285585925	0.000260501833121004	-0.000315315307331242	0.000705851878503092	0.000195268285585925	0.000260501833121004	-0.000315315307331242	0.000705851878503092	0.00295429499614126	0.000370220267019251	0.00222866327278353	0.00367992671949899
8	PreTest, EntryTest, ExitTest, PCR 1D	13	0	0	0	0	3.82125434955551e-05	4.79494422228345e-05	-5.57683632612005e-05	0.000132193450252311	3.82125434955551e-05	4.79494422228345e-05	-5.57683632612005e-05	0.000132193450252311	0.000767221599522724	0.00019011416621034	0.000394597833750458	0.00113984536529499
8	PreTest, EntryTest, ExitTest, PCR 1D	14	0	0	0	0	7.41731832287169e-06	1.45207959335024e-05	-2.1043441706793e-05	3.58780783525364e-05	7.41731832287169e-06	1.45207959335024e-05	-2.1043441706793e-05	3.58780783525364e-05	0.000180077133704492	9.56325891672371e-05	-7.36274106329283e-06	0.000367517008472277
8	PreTest, EntryTest, ExitTest, PCR 1D	15	0	0	0	0	1.92454348059234e-06	1.11592877066897e-05	-1.99476604245194e-05	2.37967473857041e-05	1.92454348059234e-06	1.11592877066897e-05	-1.99476604245194e-05	2.37967473857041e-05	3.93430016896347e-05	4.22717022549741e-05	-4.35095347301145e-05	0.000122195538109384
8	PreTest, EntryTest, ExitTest, PCR 1D	16	0	0	0	0	2.29272762180782e-07	9.2466852918794e-07	-1.58307755502758e-06	2.04162307938914e-06	2.29272762180782e-07	9.2466852918794e-07	-1.58307755502758e-06	2.04162307938914e-06	8.06016957614841e-06	1.93488217237741e-05	-2.98635210024488e-05	4.59838601547456e-05
8	PreTest, EntryTest, ExitTest, PCR 1D	17	0	0	0	0	5.26849660835706e-07	1.34093390272412e-05	-2.5755454832557e-05	2.68091541542284e-05	5.26849660835706e-07	1.34093390272412e-05	-2.5755454832557e-05	2.68091541542284e-05	1.71843636727691e-06	8.89713605639201e-06	-1.57199503032514e-05	1.91568230378052e-05
8	PreTest, EntryTest, ExitTest, PCR 1D	18	0	0	0	0	2.99887177894255e-09	6.33675371078965e-08	-1.21201500952535e-07	1.2719924451042e-07	2.99887177894255e-09	6.33675371078965e-08	-1.21201500952535e-07	1.2719924451042e-07	1.43993569128607e-07	2.62632236536151e-06	-5.00359826697996e-06	5.29158540523717e-06
8	PreTest, EntryTest, ExitTest, PCR 1D	19	0	0	0	0	1.48250215752407e-08	3.98398477966215e-07	-7.6603599523854e-07	7.95686038389021e-07	1.48250215752407e-08	3.98398477966215e-07	-7.6603599523854e-07	7.95686038389021e-07	1.43363881202766e-07	2.61488886530969e-06	-4.98181829480423e-06	5.26854605720976e-06
8	PreTest, EntryTest, ExitTest, PCR 1D	20	0	0	0	0	6.30075373102602e-09	1.79504435755243e-07	-3.4552794034925e-07	3.58129447811302e-07	6.30075373102602e-09	1.79504435755243e-07	-3.4552794034925e-07	3.58129447811302e-07	9.52476323455271e-08	2.12876618408023e-06	-4.07713408845172e-06	4.26762935314278e-06
8	PreTest, EntryTest, ExitTest, PCR 1D	21	0	0	0	0	0	0	0	0	0	0	0	0	0	0	0	0
9	PreTest, EntryTest, ExitTest, PCR 2D	0	805.852802087825	18.5675765570012	769.460352036102	842.245252139547	2552.97885571239	35.9400208680957	2482.53641481092	2623.42129661386	3358.83165780021	42.9403449813738	3274.66858163672	3442.99473396371	0.302665569076643	0.00308828524612507	0.296612529994238	0.308718608159048
9	PreTest, EntryTest, ExitTest, PCR 2D	1	747.979223312643	17.3863113612711	713.902053044551	782.056393580734	2543.30889765119	35.8192887727405	2473.10309165661	2613.51470364576	3291.28812096383	42.2821642994333	3208.41507893694	3374.16116299072	0.277935649169363	0.00305328615069401	0.271951208314002	0.283920090024723
9	PreTest, EntryTest, ExitTest, PCR 2D	2	523.544726096448	13.8598283721234	496.379462487086	550.70998970581	2286.33960633688	33.3628741860897	2220.94837293215	2351.73083974162	2809.88433243333	39.1703744815445	2733.1103984495	2886.65826641716	0.240738403110744	0.00297520290143481	0.234907005423932	0.246569800797556
9	PreTest, EntryTest, ExitTest, PCR 2D	3	145.76511390813	6.62807872773558	132.774079601768	158.756148214492	794.634782285609	19.9840761569438	755.465993017999	833.803571553218	940.399896193739	22.777360882334	895.756268864364	985.043523523113	0.0837442048294214	0.00188972684786383	0.0800403402076083	0.0874480694512345
9	PreTest, EntryTest, ExitTest, PCR 2D	4	23.2505796170615	2.56005295566748	18.2328758239532	28.2682834101698	148.804707997446	8.65602062204893	131.83890757823	165.770508416662	172.055287614507	9.85202274260672	152.745323038998	191.365252190016	0.0189378993801008	0.000952799571692492	0.0170704122195835	0.0208053865406181
9	PreTest, EntryTest, ExitTest, PCR 2D	5	2.90481840244971	0.868617665005223	1.20232777903947	4.60730902585995	20.432547297752	3.00438312179292	14.5439563790379	26.3211382164661	23.3373657002017	3.37069681597626	16.7307999408883	29.9439314595152	0.00516481557225515	0.000503274566065936	0.00417839742276592	0.00615123372174438
9	PreTest, EntryTest, ExitTest, PCR 2D	6	0.380347476486064	0.311623693673356	-0.230434963113713	0.991129916085842	2.93964271949844	1.14211231585869	0.701102580415407	5.17818285858147	3.3199901959845	1.29250800484167	0.786674506494829	5.85330588547418	0.00595443893030453	0.000543147516125586	0.00488986979869838	0.00701900806191068
9	PreTest, EntryTest, ExitTest, PCR 2D	7	0.0475592070345541	0.113623105323206	-0.175142079398929	0.270260493468037	0.459397065366157	0.42516989923653	-0.373935937137442	1.29273006786976	0.506956272400711	0.472789679910803	-0.419711500224463	1.43362404502589	0.0116547040019656	0.000762892877834475	0.01015943396141	0.0131499740425212
9	PreTest, EntryTest, ExitTest, PCR 2D	8	0.00519032490401977	0.0287981751987104	-0.0512540984854526	0.0616347482934922	0.074937915204114	0.160725387018599	-0.24008384335234	0.389959673760568	0.0801282401081337	0.173892712707699	-0.260701476798956	0.420957957015223	0.0189826249950827	0.000920015497689186	0.0171793946196119	0.0207858553705535
9	PreTest, EntryTest, ExitTest, PCR 2D	9	0.0016489151852821	0.0195261541404631	-0.0366223469300255	0.0399201773005897	0.0191114795304852	0.0787571305487963	-0.135252496345156	0.173475455406126	0.0207603947157673	0.0882517163831854	-0.152212969395276	0.193733758826811	0.0209340336234449	0.000926922483992911	0.0191172655548188	0.022750801692071
9	PreTest, EntryTest, ExitTest, PCR 2D	10	6.19914442145282e-05	0.00196034159161177	-0.00378027807534454	0.00390426096377359	0.0027003445832018	0.0204374501582758	-0.0373570577270189	0.0427577468934225	0.00276233602741633	0.0222636252149802	-0.0408743693939449	0.0463990414487776	0.0146604068784927	0.000840954478886889	0.0130121360998744	0.016308677657111
9	PreTest, EntryTest, ExitTest, PCR 2D	11	0.000427343044086718	0.0135137736154378	-0.0260596532421713	0.0269143393303448	0.000722010714666079	0.00488868543897318	-0.00885981274572135	0.0103038341750535	0.0011493537587528	0.0181528012831126	-0.0344301367561479	0.0367288442736535	0.00674638890547229	0.000560115128957418	0.00564856325271575	0.00784421455822883
9	PreTest, EntryTest, ExitTest, PCR 2D	12	0	0	0	0	0.000567355516041626	0.0133402465370754	-0.0255795276966261	0.0267142387287094	0.000567355516041626	0.0133402465370754	-0.0255795276966261	0.0267142387287094	0.00225959193532057	0.000322004630394778	0.0016284628597468	0.00289072101089434
9	PreTest, EntryTest, ExitTest, PCR 2D	13	0	0	0	0	3.34350385295394e-05	0.000140448214635681	-0.000241843462156396	0.000308713539215474	3.34350385295394e-05	0.000140448214635681	-0.000241843462156396	0.000308713539215474	0.000605989168938646	0.000166692200659915	0.000279272455645212	0.000932705882232079
9	PreTest, EntryTest, ExitTest, PCR 2D	14	0	0	0	0	6.81771003427873e-06	1.9694877562227e-05	-3.17842499876862e-05	4.54196700562437e-05	6.81771003427873e-06	1.9694877562227e-05	-3.17842499876862e-05	4.54196700562437e-05	0.00014836076518885	8.21000952233461e-05	-1.25554214489087e-05	0.000309276951826608
9	PreTest, EntryTest, ExitTest, PCR 2D	15	0	0	0	0	1.3369938053739e-06	5.54884065548897e-06	-9.53873387938447e-06	1.22127214901323e-05	1.3369938053739e-06	5.54884065548897e-06	-9.53873387938447e-06	1.22127214901323e-05	3.1141492175789e-05	3.7886103099156e-05	-4.31152698985568e-05	0.000105398254250135
9	PreTest, EntryTest, ExitTest, PCR 2D	16	0	0	0	0	3.49356881841158e-07	2.41701970863485e-06	-4.38800174708315e-06	5.08671551076547e-06	3.49356881841158e-07	2.41701970863485e-06	-4.38800174708315e-06	5.08671551076547e-06	8.10518621370805e-06	1.90283423719266e-05	-2.91903648352682e-05	4.54007372626843e-05
9	PreTest, EntryTest, ExitTest, PCR 2D	17	0	0	0	0	4.62207397156489e-08	4.02362911305923e-07	-7.4241056644396e-07	8.34852045875257e-07	4.62207397156489e-08	4.02362911305923e-07	-7.4241056644396e-07	8.34852045875257e-07	1.47838263920188e-06	8.26976490866883e-06	-1.4730356581789e-05	1.76871218601928e-05
9	PreTest, EntryTest, ExitTest, PCR 2D	18	0	0	0	0	3.72888246443903e-08	8.74452913025935e-07	-1.67663888488644e-06	1.75121653417522e-06	3.72888246443903e-08	8.74452913025935e-07	-1.67663888488644e-06	1.75121653417522e-06	3.82752813983242e-07	4.26445898325737e-06	-7.97558679320119e-06	8.74109242116768e-06
9	PreTest, EntryTest, ExitTest, PCR 2D	19	0	0	0	0	2.16907815291866e-08	4.3878933255666e-07	-8.38336310281868e-07	8.81717873340241e-07	2.16907815291866e-08	4.3878933255666e-07	-8.38336310281868e-07	8.81717873340241e-07	2.38529814073797e-07	3.36661413720785e-06	-6.36003389485359e-06	6.83709352300118e-06
9	PreTest, EntryTest, ExitTest, PCR 2D	20	0	0	0	0	3.10339628075528e-09	7.99613999914937e-08	-1.53620947702572e-07	1.59827740264083e-07	3.10339628075528e-09	7.99613999914937e-08	-1.53620947702572e-07	1.59827740264083e-07	9.53713631999097e-08	2.13151843713527e-06	-4.08240477358522e-06	4.27314749998503e-06
9	PreTest, EntryTest, ExitTest, PCR 2D	21	0	0	0	0	0	0	0	0	0	0	0	0	0	0	0	0
10	PreTest, EntryTest, ExitTest, DailyTest, PCR 0D	0	613.754128462959	15.9075528913377	582.575324795937	644.932932129981	1937.05923365283	31.6843974177086	1874.95781471412	1999.16065259154	2550.81336211579	37.8941764238425	2476.54077632506	2625.08594790652	0.286835974818403	0.00320159407351287	0.280560850434317	0.293111099202488
10	PreTest, EntryTest, ExitTest, DailyTest, PCR 0D	1	161.86873519517	7.87813856546145	146.427583606866	177.309886783475	516.299955078741	16.7277116793794	483.513640187158	549.086269970325	678.168690273912	19.9590637289749	639.048925365121	717.288455182703	0.0765420153281514	0.00185240994488346	0.0729112918361798	0.080172738820123
10	PreTest, EntryTest, ExitTest, DailyTest, PCR 0D	2	13.0624755658692	2.26358466579111	8.62584962091864	17.4991015108198	43.7715104291856	4.95046542942857	34.0685981875056	53.4744226708656	56.8339859950549	5.8696492148772	45.3294735338955	68.3384984562142	0.0104418104678689	0.000659359335304907	0.00914946617067126	0.0117341547650665
10	PreTest, EntryTest, ExitTest, DailyTest, PCR 0D	3	0.49225462882878	0.425503829290032	-0.341732876579683	1.32624213423724	1.82928200951784	0.947710626873693	-0.0282308191545955	3.68679483819028	2.32153663834662	1.12659031254862	0.113419625751321	4.52965365094192	0.00102824965698882	0.000216141036370346	0.000604613225702941	0.0014518860882747
10	PreTest, EntryTest, ExitTest, DailyTest, PCR 0D	4	0.018304122302473	0.0837299791878344	-0.145806636905682	0.182414881510628	0.0614117440861393	0.182844969091472	-0.296964395333145	0.419787883505424	0.0797158663886123	0.217920064091308	-0.347407459230352	0.506839192007576	7.49820147465026e-05	6.03273827691762e-05	-4.32596554810827e-05	0.000193223684974088
10	PreTest, EntryTest, ExitTest, DailyTest, PCR 0D	5	0.000410606295540865	0.00591428265264369	-0.0111813877036408	0.0120026002947225	0.00311130477342539	0.0401704918968433	-0.0756228593443875	0.0818454688912383	0.00352191106896625	0.0454274427142374	-0.0855158766509389	0.0925596987888714	3.96112154767206e-06	1.38508883490923e-05	-2.31866196165488e-05	3.11088627118929e-05
10	PreTest, EntryTest, ExitTest, DailyTest, PCR 0D	6	0	0	0	0	5.78965020133055e-09	9.74739580982697e-08	-1.85259307671278e-07	1.96838608073939e-07	5.78965020133055e-09	9.74739580982697e-08	-1.85259307671278e-07	1.96838608073939e-07	1.9061339012297e-07	3.0093419113784e-06	-5.70769675617869e-06	6.08892353642463e-06
10	PreTest, EntryTest, ExitTest, DailyTest, PCR 0D	7	0	0	0	0	1.04512024146955e-09	3.30496039178895e-08	-6.37321034375939e-08	6.5822343920533e-08	1.04512024146955e-09	3.30496039178895e-08	-6.37321034375939e-08	6.5822343920533e-08	4.78697941598851e-08	1.51377580668663e-06	-2.91913078694592e-06	3.01487037526569e-06
10	PreTest, EntryTest, ExitTest, DailyTest, PCR 0D	8	0	0	0	0	0	0	0	0	0	0	0	0	0	0	0	0
10	PreTest, EntryTest, ExitTest, DailyTest, PCR 0D	9	0	0	0	0	0	0	0	0	0	0	0	0	0	0	0	0
10	PreTest, EntryTest, ExitTest, DailyTest, PCR 0D	10	0	0	0	0	0	0	0	0	0	0	0	0	0	0	0	0
10	PreTest, EntryTest, ExitTest, DailyTest, PCR 0D	11	0	0	0	0	0	0	0	0	0	0	0	0	0	0	0	0
10	PreTest, EntryTest, ExitTest, DailyTest, PCR 0D	12	0	0	0	0	0	0	0	0	0	0	0	0	0	0	0	0
10	PreTest, EntryTest, ExitTest, DailyTest, PCR 0D	13	0	0	0	0	0	0	0	0	0	0	0	0	0	0	0	0
10	PreTest, EntryTest, ExitTest, DailyTest, PCR 0D	14	0	0	0	0	0	0	0	0	0	0	0	0	0	0	0	0
10	PreTest, EntryTest, ExitTest, DailyTest, PCR 0D	15	0	0	0	0	0	0	0	0	0	0	0	0	0	0	0	0
10	PreTest, EntryTest, ExitTest, DailyTest, PCR 0D	16	0	0	0	0	0	0	0	0	0	0	0	0	0	0	0	0
10	PreTest, EntryTest, ExitTest, DailyTest, PCR 0D	17	0	0	0	0	0	0	0	0	0	0	0	0	0	0	0	0
10	PreTest, EntryTest, ExitTest, DailyTest, PCR 0D	18	0	0	0	0	0	0	0	0	0	0	0	0	0	0	0	0
10	PreTest, EntryTest, ExitTest, DailyTest, PCR 0D	19	0	0	0	0	0	0	0	0	0	0	0	0	0	0	0	0
10	PreTest, EntryTest, ExitTest, DailyTest, PCR 0D	20	0	0	0	0	0	0	0	0	0	0	0	0	0	0	0	0
10	PreTest, EntryTest, ExitTest, DailyTest, PCR 0D	21	0	0	0	0	0	0	0	0	0	0	0	0	0	0	0	0
11	PreTest, EntryTest, ExitTest, DailyTest, Antigen	0	682.71177593753	16.693394667501	649.992722389228	715.430829485832	2156.8825731119	32.344475096857	2093.48740192206	2220.27774430174	2839.59434904943	38.9212903832861	2763.30861989819	2915.88007820067	0.327999614044697	0.00330032068527374	0.321530985501561	0.334468242587834
11	PreTest, EntryTest, ExitTest, DailyTest, Antigen	1	250.316699105725	10.1566810109669	230.40960432423	270.22379388722	797.808141927007	20.4099912612302	757.804559054996	837.811724799018	1048.12484103273	25.1914504745086	998.749598102695	1097.50008396277	0.122238697772826	0.00226713079852195	0.117795121407723	0.126682274137929
11	PreTest, EntryTest, ExitTest, DailyTest, Antigen	2	28.6927709170043	3.4475105313725	21.9356502755142	35.4498915584944	95.663101328153	7.09661779800131	81.7537304440704	109.572472212236	124.355872245157	8.6801648247648	107.342749188618	141.368995301696	0.0228498706111467	0.00102929896394744	0.0208324446418098	0.0248672965804837
11	PreTest, EntryTest, ExitTest, DailyTest, Antigen	3	1.39703449486178	0.707050822347362	0.0112148830609464	2.78285410666261	5.041143339375	1.65648362333794	1.79443543763264	8.28785124111737	6.43817783423678	1.92909617900199	2.65714932339288	10.2192063450807	0.00291875383339028	0.000376136462785927	0.00218152636632986	0.0036559813004507
11	PreTest, EntryTest, ExitTest, DailyTest, Antigen	4	0.0617358467146128	0.157709916688447	-0.247375589994744	0.37084728342397	0.214134146374958	0.333574936448923	-0.439672729064931	0.867941021814847	0.27586999308957	0.403087206957639	-0.514180932547402	1.06592091872654	0.000274787866889143	0.000116880360852588	4.57023596180716e-05	0.000503873374160215
11	PreTest, EntryTest, ExitTest, DailyTest, Antigen	5	0.00134640716745506	0.0161095039849561	-0.0302282206430589	0.0329210349779691	0.0121642824836138	0.0822311447725231	-0.149008761270532	0.173337326237759	0.0135106896510688	0.0931089156767476	-0.168982785075356	0.196004164377494	1.87376696583203e-05	3.04810567649101e-05	-4.10052016009035e-05	7.84805409175441e-05
11	PreTest, EntryTest, ExitTest, DailyTest, Antigen	6	0	0	0	0	3.31204985603471e-08	2.44194739683269e-07	-4.4550119121886e-07	5.11742188339555e-07	3.31204985603471e-08	2.44194739683269e-07	-4.4550119121886e-07	5.11742188339555e-07	1.14403880813672e-06	7.61151548799453e-06	-1.37745315483326e-05	1.6062609164606e-05
11	PreTest, EntryTest, ExitTest, DailyTest, Antigen	7	0	0	0	0	0.000710534678626977	0.0224690497264151	-0.0433288027851467	0.0447498721424006	0.000710534678626977	0.0224690497264151	-0.0433288027851467	0.0447498721424006	9.57039366742871e-08	2.13897055865102e-06	-4.09667835828171e-06	4.28808623163029e-06
11	PreTest, EntryTest, ExitTest, DailyTest, Antigen	8	0	0	0	0	0	0	0	0	0	0	0	0	0	0	0	0
11	PreTest, EntryTest, ExitTest, DailyTest, Antigen	9	0	0	0	0	0	0	0	0	0	0	0	0	0	0	0	0
11	PreTest, EntryTest, ExitTest, DailyTest, Antigen	10	0	0	0	0	0	0	0	0	0	0	0	0	0	0	0	0
11	PreTest, EntryTest, ExitTest, DailyTest, Antigen	11	0	0	0	0	0	0	0	0	0	0	0	0	0	0	0	0
11	PreTest, EntryTest, ExitTest, DailyTest, Antigen	12	0	0	0	0	0	0	0	0	0	0	0	0	0	0	0	0
11	PreTest, EntryTest, ExitTest, DailyTest, Antigen	13	0	0	0	0	0	0	0	0	0	0	0	0	0	0	0	0
11	PreTest, EntryTest, ExitTest, DailyTest, Antigen	14	0	0	0	0	0	0	0	0	0	0	0	0	0	0	0	0
11	PreTest, EntryTest, ExitTest, DailyTest, Antigen	15	0	0	0	0	0	0	0	0	0	0	0	0	0	0	0	0
11	PreTest, EntryTest, ExitTest, DailyTest, Antigen	16	0	0	0	0	0	0	0	0	0	0	0	0	0	0	0	0
11	PreTest, EntryTest, ExitTest, DailyTest, Antigen	17	0	0	0	0	0	0	0	0	0	0	0	0	0	0	0	0
11	PreTest, EntryTest, ExitTest, DailyTest, Antigen	18	0	0	0	0	0	0	0	0	0	0	0	0	0	0	0	0
11	PreTest, EntryTest, ExitTest, DailyTest, Antigen	19	0	0	0	0	0	0	0	0	0	0	0	0	0	0	0	0
11	PreTest, EntryTest, ExitTest, DailyTest, Antigen	20	0	0	0	0	0	0	0	0	0	0	0	0	0	0	0	0
11	PreTest, EntryTest, ExitTest, DailyTest, Antigen	21	0	0	0	0	0	0	0	0	0	0	0	0	0	0	0	0
12	PreTest, EntryTest, ExitTest, DailyTest, PCR 1D	0	750.542868125345	17.4597267075669	716.321803778514	784.763932472176	2373.90435157309	33.9971260832853	2307.26998444985	2440.53871869633	3124.44721969844	40.66178530436	3044.75012050189	3204.14431889498	0.306563975125608	0.00311442846544893	0.300459695333328	0.312668254917888
12	PreTest, EntryTest, ExitTest, DailyTest, PCR 1D	1	702.128082027735	16.5074877101641	669.773406115813	734.482757939657	2370.92020060046	33.9434264288121	2304.39108479998	2437.44931640093	3073.04828262819	40.164632695747	2994.32560254453	3151.77096271185	0.272069373441276	0.00301443958732605	0.266161071850117	0.277977675032435
12	PreTest, EntryTest, ExitTest, DailyTest, PCR 1D	2	154.914555483117	7.58452529876815	140.048885897531	169.780225068702	529.808951029278	16.8024501028801	496.876148827633	562.741753230923	684.723506512394	19.9033158282712	645.713007488983	723.734005535806	0.0584941570124372	0.00160817180756376	0.0553421402696123	0.0616461737552622
12	PreTest, EntryTest, ExitTest, DailyTest, PCR 1D	3	11.6558960356203	2.05634738187577	7.62545516714379	15.6863369040968	44.3585171673761	4.97069661072553	34.6159518103541	54.1010825243982	56.0144132029964	5.83854880554074	44.5708575441365	67.4579688618563	0.00511359003199318	0.00050293613020262	0.00412783521679604	0.00609934484719031
12	PreTest, EntryTest, ExitTest, DailyTest, PCR 1D	4	0.440366653739354	0.387383807655516	-0.318905609265457	1.19963891674416	1.8400644233835	0.95043058405581	-0.0227795213658917	3.70290836813288	2.28043107712285	1.12453178287481	0.0763487826882279	4.48451337155747	0.000233072234246519	0.000102373587449307	3.24200028458774e-05	0.000433724465647161
12	PreTest, EntryTest, ExitTest, DailyTest, PCR 1D	5	0.013792246898437	0.069555522718214	-0.122536577629263	0.150121071426137	0.0600985969757573	0.180347690973026	-0.293382877331374	0.413580071282889	0.0738908438741943	0.211328110211635	-0.340312252140609	0.488093939888998	8.00976935276454e-06	1.96513128317844e-05	-3.05068037975329e-05	4.6526342503062e-05
12	PreTest, EntryTest, ExitTest, DailyTest, PCR 1D	6	0.000410606133573776	0.00591428058733759	-0.0111813838176079	0.0120025960847554	0.00308348434547694	0.0398134002512623	-0.0749507801469972	0.0811177488379511	0.00349409047905072	0.0450715793184715	-0.0848462049851534	0.0918343859432548	3.34917086055628e-07	3.99102874777132e-06	-7.48749925957616e-06	8.15733343168742e-06
12	PreTest, EntryTest, ExitTest, DailyTest, PCR 1D	7	0	0	0	0	0	0	0	0	0	0	0	0	0	0	0	0
12	PreTest, EntryTest, ExitTest, DailyTest, PCR 1D	8	0	0	0	0	0	0	0	0	0	0	0	0	0	0	0	0
12	PreTest, EntryTest, ExitTest, DailyTest, PCR 1D	9	0	0	0	0	0	0	0	0	0	0	0	0	0	0	0	0
12	PreTest, EntryTest, ExitTest, DailyTest, PCR 1D	10	0	0	0	0	0	0	0	0	0	0	0	0	0	0	0	0
12	PreTest, EntryTest, ExitTest, DailyTest, PCR 1D	11	0	0	0	0	0	0	0	0	0	0	0	0	0	0	0	0
12	PreTest, EntryTest, ExitTest, DailyTest, PCR 1D	12	0	0	0	0	0	0	0	0	0	0	0	0	0	0	0	0
12	PreTest, EntryTest, ExitTest, DailyTest, PCR 1D	13	0	0	0	0	0	0	0	0	0	0	0	0	0	0	0	0
12	PreTest, EntryTest, ExitTest, DailyTest, PCR 1D	14	0	0	0	0	0	0	0	0	0	0	0	0	0	0	0	0
12	PreTest, EntryTest, ExitTest, DailyTest, PCR 1D	15	0	0	0	0	0	0	0	0	0	0	0	0	0	0	0	0
12	PreTest, EntryTest, ExitTest, DailyTest, PCR 1D	16	0	0	0	0	0	0	0	0	0	0	0	0	0	0	0	0
12	PreTest, EntryTest, ExitTest, DailyTest, PCR 1D	17	0	0	0	0	0	0	0	0	0	0	0	0	0	0	0	0
12	PreTest, EntryTest, ExitTest, DailyTest, PCR 1D	18	0	0	0	0	0	0	0	0	0	0	0	0	0	0	0	0
12	PreTest, EntryTest, ExitTest, DailyTest, PCR 1D	19	0	0	0	0	0	0	0	0	0	0	0	0	0	0	0	0
12	PreTest, EntryTest, ExitTest, DailyTest, PCR 1D	20	0	0	0	0	0	0	0	0	0	0	0	0	0	0	0	0
12	PreTest, EntryTest, ExitTest, DailyTest, PCR 1D	21	0	0	0	0	0	0	0	0	0	0	0	0	0	0	0	0
13	PreTest, EntryTest, ExitTest, DailyTest, PCR 2D	0	805.852802087825	18.5675765570012	769.460352036102	842.245252139547	2552.97885571239	35.9400208680957	2482.53641481092	2623.42129661386	3358.83165780021	42.9403449813738	3274.66858163672	3442.99473396371	0.302665569076643	0.00308828524612507	0.296612529994238	0.308718608159048
13	PreTest, EntryTest, ExitTest, DailyTest, PCR 2D	1	747.979223312643	17.3863113612711	713.902053044551	782.056393580734	2543.30889765119	35.8192887727405	2473.10309165661	2613.51470364576	3291.28812096383	42.2821642994333	3208.41507893694	3374.16116299072	0.277935649169363	0.00305328615069401	0.271951208314002	0.283920090024723
13	PreTest, EntryTest, ExitTest, DailyTest, PCR 2D	2	523.544726096448	13.8598283721234	496.379462487086	550.70998970581	2286.33960633688	33.3628741860897	2220.94837293215	2351.73083974162	2809.88433243333	39.1703744815445	2733.1103984495	2886.65826641716	0.240738403110744	0.00297520290143481	0.234907005423932	0.246569800797556
13	PreTest, EntryTest, ExitTest, DailyTest, PCR 2D	3	98.9852027395603	5.51387688057941	88.1780040536246	109.792401425496	510.844001664055	16.2398584321392	479.013879137062	542.674124191048	609.829204403615	18.7455568650083	573.087912948199	646.570495859032	0.0517589156383825	0.00154096444343371	0.0487386253292524	0.0547792059475126
13	PreTest, EntryTest, ExitTest, DailyTest, PCR 2D	4	7.06630028272649	1.45991878731519	4.20485945958872	9.92774110586426	38.9028159327551	4.5713070354629	29.9430541432478	47.8625777222623	45.9691162154815	5.18646929100774	35.8036364051064	56.1345960258567	0.00420485709250603	0.000456365429080258	0.00331038085150872	0.00509933333350334
13	PreTest, EntryTest, ExitTest, DailyTest, PCR 2D	5	0.303945604337077	0.318332129280104	-0.319985369051928	0.927876577726081	1.58233174098736	0.884797715331033	-0.151871781061461	3.31653526303619	1.88627734532444	1.02995578419865	-0.132435991704923	3.9049906823538	0.000177669817389176	9.16981278601474e-05	-2.05851321671347e-06	0.000357398147995065
13	PreTest, EntryTest, ExitTest, DailyTest, PCR 2D	6	0.00915041913090549	0.0512107690888626	-0.0912226882832652	0.109523526545076	0.0594358295870142	0.169379754732162	-0.272548489688024	0.391420148862053	0.0685862487179197	0.193150442807036	-0.309988619183871	0.447161116619711	6.38503041079228e-06	1.70585685284673e-05	-2.70497639050036e-05	3.98198247265881e-05
13	PreTest, EntryTest, ExitTest, DailyTest, PCR 2D	7	9.28854319757587e-05	0.00293729526492032	-0.00566421328726806	0.00584998415121958	0.00168963028203259	0.0313614769851293	-0.0597788646088209	0.0631581251728861	0.00178251571400835	0.0329775907305117	-0.0628535621177945	0.0664185935458112	1.43218786640796e-07	2.61223017981745e-06	-4.9767523658014e-06	5.26318993908299e-06
13	PreTest, EntryTest, ExitTest, DailyTest, PCR 2D	8	0	0	0	0	0	0	0	0	0	0	0	0	0	0	0	0
13	PreTest, EntryTest, ExitTest, DailyTest, PCR 2D	9	0	0	0	0	7.61068863051843e-10	2.40671106347859e-08	-4.64104679811286e-08	4.79326057072322e-08	7.61068863051843e-10	2.40671106347859e-08	-4.64104679811286e-08	4.79326057072322e-08	4.76712589979501e-08	1.50749757361319e-06	-2.90702398528389e-06	3.00236650327979e-06
13	PreTest, EntryTest, ExitTest, DailyTest, PCR 2D	10	0	0	0	0	0	0	0	0	0	0	0	0	0	0	0	0
13	PreTest, EntryTest, ExitTest, DailyTest, PCR 2D	11	0	0	0	0	0	0	0	0	0	0	0	0	0	0	0	0
13	PreTest, EntryTest, ExitTest, DailyTest, PCR 2D	12	0	0	0	0	0	0	0	0	0	0	0	0	0	0	0	0
13	PreTest, EntryTest, ExitTest, DailyTest, PCR 2D	13	0	0	0	0	0	0	0	0	0	0	0	0	0	0	0	0
13	PreTest, EntryTest, ExitTest, DailyTest, PCR 2D	14	0	0	0	0	0	0	0	0	0	0	0	0	0	0	0	0
13	PreTest, EntryTest, ExitTest, DailyTest, PCR 2D	15	0	0	0	0	0	0	0	0	0	0	0	0	0	0	0	0
13	PreTest, EntryTest, ExitTest, DailyTest, PCR 2D	16	0	0	0	0	0	0	0	0	0	0	0	0	0	0	0	0
13	PreTest, EntryTest, ExitTest, DailyTest, PCR 2D	17	0	0	0	0	0	0	0	0	0	0	0	0	0	0	0	0
13	PreTest, EntryTest, ExitTest, DailyTest, PCR 2D	18	0	0	0	0	0	0	0	0	0	0	0	0	0	0	0	0
13	PreTest, EntryTest, ExitTest, DailyTest, PCR 2D	19	0	0	0	0	0	0	0	0	0	0	0	0	0	0	0	0
13	PreTest, EntryTest, ExitTest, DailyTest, PCR 2D	20	0	0	0	0	0	0	0	0	0	0	0	0	0	0	0	0
13	PreTest, EntryTest, ExitTest, DailyTest, PCR 2D	21	0	0	0	0	0	0	0	0	0	0	0	0	0	0	0	0
14	PreTest, EntryTest, ExitTest, TestEvery2Days, PCR 0D	0	613.754128462959	15.9075528913377	582.575324795937	644.932932129981	1937.05923365283	31.6843974177086	1874.95781471412	1999.16065259154	2550.81336211579	37.8941764238425	2476.54077632506	2625.08594790652	0.286835974818403	0.00320159407351287	0.280560850434317	0.293111099202488
14	PreTest, EntryTest, ExitTest, TestEvery2Days, PCR 0D	1	161.86873519517	7.87813856546145	146.427583606866	177.309886783475	516.299955078741	16.7277116793794	483.513640187158	549.086269970325	678.168690273912	19.9590637289749	639.048925365121	717.288455182703	0.0765420153281514	0.00185240994488346	0.0729112918361798	0.080172738820123
14	PreTest, EntryTest, ExitTest, TestEvery2Days, PCR 0D	2	46.2709102635107	4.27145224170343	37.898863869772	54.6429566572495	152.779052694457	9.09877378710945	134.945456071722	170.612649317191	199.049962957967	10.6286531647339	178.217802755089	219.882123160846	0.0237703986017369	0.00101703029857799	0.0217770192165241	0.0257637779869498
14	PreTest, EntryTest, ExitTest, TestEvery2Days, PCR 0D	3	1.08845730711828	0.637545350152402	-0.161131579180431	2.33804619341699	3.98330171620173	1.40364580747663	1.23215593354755	6.73444749885592	5.07175902332001	1.67869088060153	1.78152489734101	8.36199314929901	0.00173930747416652	0.000290969766500115	0.00116900673182629	0.00230960821650674
14	PreTest, EntryTest, ExitTest, TestEvery2Days, PCR 0D	4	0.306482399235325	0.330753333409521	-0.341794134247336	0.954758932717986	1.18899414386039	0.796435229351736	-0.372018905669009	2.7500071933898	1.49547654309572	0.941457268681543	-0.349779703520104	3.34073278971154	0.000322906442189211	0.000127943589315172	7.21370071314739e-05	0.000573675877246948
14	PreTest, EntryTest, ExitTest, TestEvery2Days, PCR 0D	5	0.00301661838164415	0.0305831082085615	-0.0569262737071363	0.0629595104704246	0.0201048114874758	0.102539379870717	-0.18087237305913	0.221081996034082	0.0231214298691199	0.113578522585365	-0.199492474398196	0.245735334136436	2.36500534078876e-05	3.345893814637e-05	-4.19294653589975e-05	8.92295721747728e-05
14	PreTest, EntryTest, ExitTest, TestEvery2Days, PCR 0D	6	0.00116410246312454	0.0145817757267207	-0.0274161779612479	0.029744382887497	0.00924939612077101	0.0693188888130656	-0.126615625952838	0.14511441819438	0.0104134985838955	0.0768060833130915	-0.140126424709764	0.160953421877555	1.45389934278995e-05	2.50485604220049e-05	-3.45561849992302e-05	6.36341718550292e-05
14	PreTest, EntryTest, ExitTest, TestEvery2Days, PCR 0D	7	0	0	0	0	2.88829282232768e-05	0.000199192393014342	-0.000361534162084833	0.000419300018531387	2.88829282232768e-05	0.000199192393014342	-0.000361534162084833	0.000419300018531387	1.05344476550167e-05	2.2982090852996e-05	-3.45104504168554e-05	5.55793457268888e-05
14	PreTest, EntryTest, ExitTest, TestEvery2Days, PCR 0D	8	0	0	0	0	7.58010992675779e-06	4.82972952048967e-05	-8.70825886748398e-05	0.000102242808528355	7.58010992675779e-06	4.82972952048967e-05	-8.70825886748398e-05	0.000102242808528355	1.18685260252151e-05	2.35028396047344e-05	-3.41970396000644e-05	5.79340916504945e-05
14	PreTest, EntryTest, ExitTest, TestEvery2Days, PCR 0D	9	0	0	0	0	1.10696763547965e-06	1.70583337116597e-05	-3.23273664393735e-05	3.45413017103328e-05	1.10696763547965e-06	1.70583337116597e-05	-3.23273664393735e-05	3.45413017103328e-05	5.81484907310242e-06	1.6453739598633e-05	-2.64344805402182e-05	3.8064178686423e-05
14	PreTest, EntryTest, ExitTest, TestEvery2Days, PCR 0D	10	0	0	0	0	1.06550190986558e-07	9.95774057423366e-07	-1.84516696156324e-06	2.05826734353636e-06	1.06550190986558e-07	9.95774057423366e-07	-1.84516696156324e-06	2.05826734353636e-06	1.95233521665341e-06	9.44704125119889e-06	-1.65638656356964e-05	2.04685360690032e-05
14	PreTest, EntryTest, ExitTest, TestEvery2Days, PCR 0D	11	0	0	0	0	1.6528507514915e-08	2.34025781491571e-07	-4.42162024208563e-07	4.75219039238393e-07	1.6528507514915e-08	2.34025781491571e-07	-4.42162024208563e-07	4.75219039238393e-07	4.30486931614783e-07	4.51960929443679e-06	-8.42794728548133e-06	9.28892114871089e-06
14	PreTest, EntryTest, ExitTest, TestEvery2Days, PCR 0D	12	0	0	0	0	1.94617682533284e-09	4.36032162607593e-08	-8.35161270457553e-08	8.7408480696421e-08	1.94617682533284e-09	4.36032162607593e-08	-8.35161270457553e-08	8.7408480696421e-08	9.49235789052723e-08	2.12151429943424e-06	-4.06324444798584e-06	4.25309160579638e-06
14	PreTest, EntryTest, ExitTest, TestEvery2Days, PCR 0D	13	0	0	0	0	0	0	0	0	0	0	0	0	0	0	0	0
14	PreTest, EntryTest, ExitTest, TestEvery2Days, PCR 0D	14	0	0	0	0	0	0	0	0	0	0	0	0	0	0	0	0
14	PreTest, EntryTest, ExitTest, TestEvery2Days, PCR 0D	15	0	0	0	0	0	0	0	0	0	0	0	0	0	0	0	0
14	PreTest, EntryTest, ExitTest, TestEvery2Days, PCR 0D	16	0	0	0	0	0	0	0	0	0	0	0	0	0	0	0	0
14	PreTest, EntryTest, ExitTest, TestEvery2Days, PCR 0D	17	0	0	0	0	0	0	0	0	0	0	0	0	0	0	0	0
14	PreTest, EntryTest, ExitTest, TestEvery2Days, PCR 0D	18	0	0	0	0	0	0	0	0	0	0	0	0	0	0	0	0
14	PreTest, EntryTest, ExitTest, TestEvery2Days, PCR 0D	19	0	0	0	0	0	0	0	0	0	0	0	0	0	0	0	0
14	PreTest, EntryTest, ExitTest, TestEvery2Days, PCR 0D	20	0	0	0	0	0	0	0	0	0	0	0	0	0	0	0	0
14	PreTest, EntryTest, ExitTest, TestEvery2Days, PCR 0D	21	0	0	0	0	0	0	0	0	0	0	0	0	0	0	0	0
15	PreTest, EntryTest, ExitTest, TestEvery2Days, Antigen	0	682.71177593753	16.693394667501	649.992722389228	715.430829485832	2156.8825731119	32.344475096857	2093.48740192206	2220.27774430174	2839.59434904943	38.9212903832861	2763.30861989819	2915.88007820067	0.327999614044697	0.00330032068527374	0.321530985501561	0.334468242587834
15	PreTest, EntryTest, ExitTest, TestEvery2Days, Antigen	1	250.316699105725	10.1566810109669	230.40960432423	270.22379388722	797.808141927007	20.4099912612302	757.804559054996	837.811724799018	1048.12484103273	25.1914504745086	998.749598102695	1097.50008396277	0.122238697772826	0.00226713079852195	0.117795121407723	0.126682274137929
15	PreTest, EntryTest, ExitTest, TestEvery2Days, Antigen	2	77.006358663354	5.59501318408984	66.0401328225379	87.97258450417	253.808061217699	11.2444203305021	231.768997369915	275.847125065483	330.814419881053	13.5770696599827	304.203363347486	357.425476414619	0.0414888955538408	0.00134438346093149	0.0388539039704151	0.0441238871372666
15	PreTest, EntryTest, ExitTest, TestEvery2Days, Antigen	3	2.27647360920452	0.872286232779783	0.566792592956148	3.9861546254529	8.24054488418664	2.13822466827552	4.04962453436662	12.4314652340067	10.5170184933912	2.4595526038588	5.69629538982792	15.3377415969544	0.00396819078609688	0.000437072676155541	0.00311152834083202	0.00482485323136174
15	PreTest, EntryTest, ExitTest, TestEvery2Days, Antigen	4	0.599070365355358	0.474106483608197	-0.330178342516708	1.52831907322742	2.34172341369195	1.13529524177712	0.116544739808804	4.5669020875751	2.94079377904731	1.33907443728761	0.316207881963591	5.56537967613103	0.000725575877116473	0.000190066079233928	0.000353046361817975	0.00109810539241497
15	PreTest, EntryTest, ExitTest, TestEvery2Days, Antigen	5	0.00784537400156477	0.0478398587817292	-0.0859207492106246	0.101611497213754	0.0492349104536644	0.154697983953638	-0.253973138095466	0.352442959002795	0.0570802844552292	0.175549438524991	-0.286996615053753	0.401157183964211	6.50796164088732e-05	5.55498313281471e-05	-4.3798052994295e-05	0.000173957285812041
15	PreTest, EntryTest, ExitTest, TestEvery2Days, Antigen	6	0.00311747719946946	0.0340188160641565	-0.0635594022862772	0.0697943566852161	0.0182805942261588	0.0965320474257148	-0.170922218728242	0.20748340718056	0.0213980714256282	0.112576916463939	-0.199252684843692	0.242048827694948	3.76119415929995e-05	4.27795672774658e-05	-4.62360102708335e-05	0.000121459893456833
15	PreTest, EntryTest, ExitTest, TestEvery2Days, Antigen	7	0	0	0	0	0.00085727174583088	0.0226386967650997	-0.0435145739137645	0.0452291174054263	0.00085727174583088	0.0226386967650997	-0.0435145739137645	0.0452291174054263	3.27566915903673e-05	3.86177985994769e-05	-4.29341936646074e-05	0.000108447576845342
15	PreTest, EntryTest, ExitTest, TestEvery2Days, Antigen	8	0	0	0	0	2.78632004861313e-05	0.000246891891282692	-0.000456044906427945	0.000511771307400208	2.78632004861313e-05	0.000246891891282692	-0.000456044906427945	0.000511771307400208	3.5523238131599e-05	4.13669137043643e-05	-4.55559127289551e-05	0.000116602388992153
15	PreTest, EntryTest, ExitTest, TestEvery2Days, Antigen	9	0	0	0	0	2.2231452986861e-06	9.43235758946932e-06	-1.62642755766738e-05	2.0710566174046e-05	2.2231452986861e-06	9.43235758946932e-06	-1.62642755766738e-05	2.0710566174046e-05	1.71212048677626e-05	2.85530274293722e-05	-3.8842728893807e-05	7.30851386293322e-05
15	PreTest, EntryTest, ExitTest, TestEvery2Days, Antigen	10	0	0	0	0	2.72583296616268e-07	1.1416269363702e-06	-1.96500549866932e-06	2.51017209190185e-06	2.72583296616268e-07	1.1416269363702e-06	-1.96500549866932e-06	2.51017209190185e-06	6.05788239930049e-06	1.6732642293962e-05	-2.6738096496865e-05	3.8853861295466e-05
15	PreTest, EntryTest, ExitTest, TestEvery2Days, Antigen	11	0	0	0	0	8.31943835174258e-08	1.76208886196233e-06	-3.37049978592873e-06	3.53688855296359e-06	8.31943835174258e-08	1.76208886196233e-06	-3.37049978592873e-06	3.53688855296359e-06	1.09699474362434e-06	7.15336586136538e-06	-1.29236023446518e-05	1.51175918319005e-05
15	PreTest, EntryTest, ExitTest, TestEvery2Days, Antigen	12	0	0	0	0	7.74620961853376e-09	2.44956656276707e-07	-4.72368836683812e-07	4.8786125592088e-07	7.74620961853376e-09	2.44956656276707e-07	-4.72368836683812e-07	4.8786125592088e-07	4.77326968973747e-08	1.50944041058157e-06	-2.91077050784249e-06	3.00623590163724e-06
15	PreTest, EntryTest, ExitTest, TestEvery2Days, Antigen	13	0	0	0	0	1.18914315647807e-09	3.76040083847271e-08	-7.2514713277587e-08	7.48929995905431e-08	1.18914315647807e-09	3.76040083847271e-08	-7.2514713277587e-08	7.48929995905431e-08	4.77326968973747e-08	1.50944041058157e-06	-2.91077050784249e-06	3.00623590163724e-06
15	PreTest, EntryTest, ExitTest, TestEvery2Days, Antigen	14	0	0	0	0	0	0	0	0	0	0	0	0	0	0	0	0
15	PreTest, EntryTest, ExitTest, TestEvery2Days, Antigen	15	0	0	0	0	0	0	0	0	0	0	0	0	0	0	0	0
15	PreTest, EntryTest, ExitTest, TestEvery2Days, Antigen	16	0	0	0	0	0	0	0	0	0	0	0	0	0	0	0	0
15	PreTest, EntryTest, ExitTest, TestEvery2Days, Antigen	17	0	0	0	0	0	0	0	0	0	0	0	0	0	0	0	0
15	PreTest, EntryTest, ExitTest, TestEvery2Days, Antigen	18	0	0	0	0	0	0	0	0	0	0	0	0	0	0	0	0
15	PreTest, EntryTest, ExitTest, TestEvery2Days, Antigen	19	0	0	0	0	0	0	0	0	0	0	0	0	0	0	0	0
15	PreTest, EntryTest, ExitTest, TestEvery2Days, Antigen	20	0	0	0	0	0	0	0	0	0	0	0	0	0	0	0	0
15	PreTest, EntryTest, ExitTest, TestEvery2Days, Antigen	21	0	0	0	0	0	0	0	0	0	0	0	0	0	0	0	0
16	PreTest, EntryTest, ExitTest, TestEvery2Days, PCR 1D	0	750.542868125345	17.4597267075669	716.321803778514	784.763932472176	2373.90435157309	33.9971260832853	2307.26998444985	2440.53871869633	3124.44721969844	40.66178530436	3044.75012050189	3204.14431889498	0.306563975125608	0.00311442846544893	0.300459695333328	0.312668254917888
16	PreTest, EntryTest, ExitTest, TestEvery2Days, PCR 1D	1	702.128082027735	16.5074877101641	669.773406115813	734.482757939657	2370.92020060046	33.9434264288121	2304.39108479998	2437.44931640093	3073.04828262819	40.164632695747	2994.32560254453	3151.77096271185	0.272069373441276	0.00301443958732605	0.266161071850117	0.277977675032435
16	PreTest, EntryTest, ExitTest, TestEvery2Days, PCR 1D	2	154.914555483117	7.58452529876815	140.048885897531	169.780225068702	529.808951029278	16.8024501028801	496.876148827633	562.741753230923	684.723506512394	19.9033158282712	645.713007488983	723.734005535806	0.0584941570124372	0.00160817180756376	0.0553421402696123	0.0616461737552622
16	PreTest, EntryTest, ExitTest, TestEvery2Days, PCR 1D	3	35.5607230919485	3.43444197113036	28.829216828533	42.292229355364	154.175270399151	9.16850629869618	136.204998053706	172.145542744595	189.735993491099	10.5898532584319	168.979881104573	210.492105877626	0.0164470520554142	0.000893264092270631	0.0146962544345638	0.0181978496762647
16	PreTest, EntryTest, ExitTest, TestEvery2Days, PCR 1D	4	0.918656588609373	0.561191341427373	-0.181278440588279	2.01859161780702	3.97557969835235	1.41343346627057	1.20525010446202	6.74590929224267	4.89423628696172	1.6675250587007	1.62588717190834	8.1625854020151	0.000500894704276712	0.00015469041744751	0.000197701486079592	0.000804087922473832
16	PreTest, EntryTest, ExitTest, TestEvery2Days, PCR 1D	5	0.206757358587302	0.249864834972088	-0.28297771795799	0.696492435132594	1.015643986679	0.725483072841115	-0.406302836089586	2.43759080944758	1.2224013452663	0.837575773385657	-0.419247170569587	2.86404986110219	0.000140521116714655	8.10127879066387e-05	-1.82639475823565e-05	0.000299306181011667
16	PreTest, EntryTest, ExitTest, TestEvery2Days, PCR 1D	6	0.00296276705014243	0.030532686281873	-0.0568812980623286	0.0628068321626135	0.016214759682899	0.0926782766419373	-0.165434662535298	0.197864181901096	0.0191775267330414	0.104366095983237	-0.185380021394103	0.223735074860186	9.39122602597946e-06	2.05780311993169e-05	-3.09417151246816e-05	4.97241671766405e-05
16	PreTest, EntryTest, ExitTest, TestEvery2Days, PCR 1D	7	0.000916577110003383	0.0134578243856644	-0.0254607586858988	0.0272939129059056	0.00848541052927594	0.069937658849946	-0.128592400816618	0.14556322187517	0.00940198763927932	0.0758561986227802	-0.13927616166137	0.158080136939929	1.53997985841368e-05	2.59739545550934e-05	-3.55091523438461e-05	6.63087495121198e-05
16	PreTest, EntryTest, ExitTest, TestEvery2Days, PCR 1D	8	0	0	0	0	3.74589178801904e-06	2.78222489445969e-05	-5.07857161433909e-05	5.8277499719429e-05	3.74589178801904e-06	2.78222489445969e-05	-5.07857161433909e-05	5.8277499719429e-05	9.34229208416779e-06	2.10942592805609e-05	-3.20024561057316e-05	5.06870402740672e-05
16	PreTest, EntryTest, ExitTest, TestEvery2Days, PCR 1D	9	0	0	0	0	1.01007866110316e-06	6.34898365255173e-06	-1.14339292978982e-05	1.34540866201045e-05	1.01007866110316e-06	6.34898365255173e-06	-1.14339292978982e-05	1.34540866201045e-05	6.53133571104754e-06	1.79883193545191e-05	-2.87257702238099e-05	4.1788441645905e-05
16	PreTest, EntryTest, ExitTest, TestEvery2Days, PCR 1D	10	0	0	0	0	1.22679287407864e-07	1.67677045301833e-06	-3.16379080050807e-06	3.40914937532379e-06	1.22679287407864e-07	1.67677045301833e-06	-3.16379080050807e-06	3.40914937532379e-06	1.76222818143493e-06	9.2460492253119e-06	-1.63600283001764e-05	1.98844846630463e-05
16	PreTest, EntryTest, ExitTest, TestEvery2Days, PCR 1D	11	0	0	0	0	8.98734159219073e-09	1.09155983147113e-07	-2.04958385376151e-07	2.22933068560533e-07	8.98734159219073e-09	1.09155983147113e-07	-2.04958385376151e-07	2.22933068560533e-07	3.81895651409217e-07	4.25483958618357e-06	-7.95758993751057e-06	8.72138124032901e-06
16	PreTest, EntryTest, ExitTest, TestEvery2Days, PCR 1D	12	0	0	0	0	1.04136986812257e-09	3.2931006699365e-08	-6.35034032626329e-08	6.5586142998878e-08	1.04136986812257e-09	3.2931006699365e-08	-6.35034032626329e-08	6.5586142998878e-08	4.72500472500473e-08	1.49417768860725e-06	-2.88133822242016e-06	2.97583831692025e-06
16	PreTest, EntryTest, ExitTest, TestEvery2Days, PCR 1D	13	0	0	0	0	0	0	0	0	0	0	0	0	0	0	0	0
16	PreTest, EntryTest, ExitTest, TestEvery2Days, PCR 1D	14	0	0	0	0	0	0	0	0	0	0	0	0	0	0	0	0
16	PreTest, EntryTest, ExitTest, TestEvery2Days, PCR 1D	15	0	0	0	0	0	0	0	0	0	0	0	0	0	0	0	0
16	PreTest, EntryTest, ExitTest, TestEvery2Days, PCR 1D	16	0	0	0	0	0	0	0	0	0	0	0	0	0	0	0	0
16	PreTest, EntryTest, ExitTest, TestEvery2Days, PCR 1D	17	0	0	0	0	0	0	0	0	0	0	0	0	0	0	0	0
16	PreTest, EntryTest, ExitTest, TestEvery2Days, PCR 1D	18	0	0	0	0	0	0	0	0	0	0	0	0	0	0	0	0
16	PreTest, EntryTest, ExitTest, TestEvery2Days, PCR 1D	19	0	0	0	0	0	0	0	0	0	0	0	0	0	0	0	0
16	PreTest, EntryTest, ExitTest, TestEvery2Days, PCR 1D	20	0	0	0	0	0	0	0	0	0	0	0	0	0	0	0	0
16	PreTest, EntryTest, ExitTest, TestEvery2Days, PCR 1D	21	0	0	0	0	0	0	0	0	0	0	0	0	0	0	0	0
17	PreTest, EntryTest, ExitTest, TestEvery2Days, PCR 2D	0	805.852802087825	18.5675765570012	769.460352036102	842.245252139547	2552.97885571239	35.9400208680957	2482.53641481092	2623.42129661386	3358.83165780021	42.9403449813738	3274.66858163672	3442.99473396371	0.302665569076643	0.00308828524612507	0.296612529994238	0.308718608159048
17	PreTest, EntryTest, ExitTest, TestEvery2Days, PCR 2D	1	747.979223312643	17.3863113612711	713.902053044551	782.056393580734	2543.30889765119	35.8192887727405	2473.10309165661	2613.51470364576	3291.28812096383	42.2821642994333	3208.41507893694	3374.16116299072	0.277935649169363	0.00305328615069401	0.271951208314002	0.283920090024723
17	PreTest, EntryTest, ExitTest, TestEvery2Days, PCR 2D	2	523.544726096448	13.8598283721234	496.379462487086	550.70998970581	2286.33960633688	33.3628741860897	2220.94837293215	2351.73083974162	2809.88433243333	39.1703744815445	2733.1103984495	2886.65826641716	0.240738403110744	0.00297520290143481	0.234907005423932	0.246569800797556
17	PreTest, EntryTest, ExitTest, TestEvery2Days, PCR 2D	3	98.9852027395603	5.51387688057941	88.1780040536246	109.792401425496	510.844001664055	16.2398584321392	479.013879137062	542.674124191048	609.829204403615	18.7455568650083	573.087912948199	646.570495859032	0.0517589156383825	0.00154096444343371	0.0487386253292524	0.0547792059475126
17	PreTest, EntryTest, ExitTest, TestEvery2Days, PCR 2D	4	17.1577419178845	2.18430109520695	12.8765117712789	21.4389720644901	107.106740517003	7.31585175478168	92.7676710776309	121.445809956375	124.264482434887	8.27659786571043	108.042350618095	140.48661425168	0.0127096944691758	0.000779200597279406	0.0111824612985081	0.0142369276398434
17	PreTest, EntryTest, ExitTest, TestEvery2Days, PCR 2D	5	0.550336724703499	0.413411339734347	-0.25994950117582	1.36062295058282	3.06800925434257	1.22853603032282	0.660078634909834	5.47593987377531	3.61834597904607	1.41378473418552	0.847327900042452	6.38936405804969	0.000364260439428214	0.000132175047353316	0.000105197346615714	0.000623323532240714
17	PreTest, EntryTest, ExitTest, TestEvery2Days, PCR 2D	6	0.102870566246463	0.170400503547944	-0.231114420707509	0.436855553200434	0.661326363890171	0.54528820682442	-0.407438521485692	1.73009124926603	0.764196930136634	0.629154311754267	-0.468945520901729	1.997339381175	0.000112467409148878	7.2445044334143e-05	-2.95248777460426e-05	0.000254459696043798
17	PreTest, EntryTest, ExitTest, TestEvery2Days, PCR 2D	7	0.00197766723461704	0.0259873907213595	-0.0489576185792476	0.0529129530484817	0.0120235615923588	0.0770632502799287	-0.139020408956301	0.163067532141019	0.0140012288269758	0.0875040013493104	-0.157506613817673	0.185509071471624	8.7729437610329e-06	2.05928894761228e-05	-3.15891196121678e-05	4.91350071342336e-05
17	PreTest, EntryTest, ExitTest, TestEvery2Days, PCR 2D	8	0.000401302780052103	0.00619550583396954	-0.0117418886545282	0.0125444942146324	0.00497501025539008	0.0488586194061128	-0.0907878837805911	0.100737904291371	0.00537631303544218	0.0526345073832022	-0.0977873214356341	0.108539947506518	1.23928477137088e-05	2.37618025467264e-05	-3.41802852778748e-05	5.89659807052925e-05
17	PreTest, EntryTest, ExitTest, TestEvery2Days, PCR 2D	9	0	0	0	0	7.06883573126064e-07	9.735096234065e-06	-1.83739050456413e-05	1.97876721918935e-05	7.06883573126064e-07	9.735096234065e-06	-1.83739050456413e-05	1.97876721918935e-05	3.95716564956611e-06	1.36621310961209e-05	-2.28206112988309e-05	3.07349425979631e-05
17	PreTest, EntryTest, ExitTest, TestEvery2Days, PCR 2D	10	0	0	0	0	0.000240176945996599	0.00759040826734661	-0.0146370232580028	0.015117377149996	0.000240176945996599	0.00759040826734661	-0.0146370232580028	0.015117377149996	2.66758338215134e-06	1.09580316033142e-05	-1.88101585603444e-05	2.41453253246471e-05
17	PreTest, EntryTest, ExitTest, TestEvery2Days, PCR 2D	11	0	0	0	0	8.33150200104496e-09	1.06104905215815e-07	-1.99634112221953e-07	2.16297116224043e-07	8.33150200104496e-09	1.06104905215815e-07	-1.99634112221953e-07	2.16297116224043e-07	3.32668420339999e-07	3.9642058823528e-06	-7.43717510907148e-06	8.10251194975148e-06
17	PreTest, EntryTest, ExitTest, TestEvery2Days, PCR 2D	12	0	0	0	0	3.38161395634081e-09	8.19656680135463e-08	-1.5727109535021e-07	1.64034323262891e-07	3.38161395634081e-09	8.19656680135463e-08	-1.5727109535021e-07	1.64034323262891e-07	9.48677213017015e-08	2.12024544681613e-06	-4.06081335445792e-06	4.25054879706132e-06
17	PreTest, EntryTest, ExitTest, TestEvery2Days, PCR 2D	13	0	0	0	0	0	0	0	0	0	0	0	0	0	0	0	0
17	PreTest, EntryTest, ExitTest, TestEvery2Days, PCR 2D	14	0	0	0	0	0	0	0	0	0	0	0	0	0	0	0	0
17	PreTest, EntryTest, ExitTest, TestEvery2Days, PCR 2D	15	0	0	0	0	0	0	0	0	0	0	0	0	0	0	0	0
17	PreTest, EntryTest, ExitTest, TestEvery2Days, PCR 2D	16	0	0	0	0	0	0	0	0	0	0	0	0	0	0	0	0
17	PreTest, EntryTest, ExitTest, TestEvery2Days, PCR 2D	17	0	0	0	0	0	0	0	0	0	0	0	0	0	0	0	0
17	PreTest, EntryTest, ExitTest, TestEvery2Days, PCR 2D	18	0	0	0	0	0	0	0	0	0	0	0	0	0	0	0	0
17	PreTest, EntryTest, ExitTest, TestEvery2Days, PCR 2D	19	0	0	0	0	0	0	0	0	0	0	0	0	0	0	0	0
17	PreTest, EntryTest, ExitTest, TestEvery2Days, PCR 2D	20	0	0	0	0	0	0	0	0	0	0	0	0	0	0	0	0
17	PreTest, EntryTest, ExitTest, TestEvery2Days, PCR 2D	21	0	0	0	0	0	0	0	0	0	0	0	0	0	0	0	0
18	PreTest, EntryTest, ExitTest, TestEvery3Days, PCR 0D	0	613.754128462959	15.9075528913377	582.575324795937	644.932932129981	1937.05923365283	31.6843974177086	1874.95781471412	1999.16065259154	2550.81336211579	37.8941764238425	2476.54077632506	2625.08594790652	0.286835974818403	0.00320159407351287	0.280560850434317	0.293111099202488
18	PreTest, EntryTest, ExitTest, TestEvery3Days, PCR 0D	1	161.86873519517	7.87813856546145	146.427583606866	177.309886783475	516.299955078741	16.7277116793794	483.513640187158	549.086269970325	678.168690273912	19.9590637289749	639.048925365121	717.288455182703	0.0765420153281514	0.00185240994488346	0.0729112918361798	0.080172738820123
18	PreTest, EntryTest, ExitTest, TestEvery3Days, PCR 0D	2	46.2709102635107	4.27145224170343	37.898863869772	54.6429566572495	152.779052694457	9.09877378710945	134.945456071722	170.612649317191	199.049962957967	10.6286531647339	178.217802755089	219.882123160846	0.0237703986017369	0.00101703029857799	0.0217770192165241	0.0257637779869498
18	PreTest, EntryTest, ExitTest, TestEvery3Days, PCR 0D	3	8.45782031204215	1.7524508962729	5.02301655534727	11.892624068737	32.4296532310791	4.27694375529688	24.0468434706973	40.812462991461	40.8874735431213	5.07343839868963	30.9435342816896	50.831412804553	0.00522564044461497	0.0005078533479718	0.00423024788259024	0.0062210330066397
18	PreTest, EntryTest, ExitTest, TestEvery3Days, PCR 0D	4	0.106381784835195	0.197522752130596	-0.280762809340774	0.493526379011163	0.473707665382274	0.485050144801449	-0.476990618428567	1.42440594919311	0.580089450217468	0.565559222914158	-0.528406626694281	1.68858552712922	0.000312380756293533	0.000122634441711732	7.20172505385384e-05	0.000552744262048527
18	PreTest, EntryTest, ExitTest, TestEvery3Days, PCR 0D	5	0.0371112715458964	0.113600658854542	-0.185546019809007	0.2597685629008	0.164852805120346	0.276784550856541	-0.377644914558474	0.707350524799166	0.201964076666242	0.330603221285049	-0.446018237052455	0.849946390384939	0.000142179486064506	7.91312418628194e-05	-1.29177479866199e-05	0.000297276720115632
18	PreTest, EntryTest, ExitTest, TestEvery3Days, PCR 0D	6	0.00629022823712814	0.0444682009892716	-0.0808674457018441	0.0934479021761004	0.0432813261650607	0.127623412351732	-0.206860562044334	0.293423214374455	0.0495715544021888	0.146312106202504	-0.237200173754719	0.336343282559096	0.000218952632409271	0.00010140712774877	2.0194662021681e-05	0.000417710602796861
18	PreTest, EntryTest, ExitTest, TestEvery3Days, PCR 0D	7	0.000122973671793911	0.00388876895102763	-0.00749901347222024	0.00774496081580806	0.00116699446301222	0.0196981410060997	-0.0374413619089432	0.0397753508349677	0.00128996813480613	0.0235566321580459	-0.0448810308949638	0.0474609671645761	0.000167262866954205	9.09877732844978e-05	-1.1073168683411e-05	0.00034559890259182
18	PreTest, EntryTest, ExitTest, TestEvery3Days, PCR 0D	8	0.000130071392153958	0.00294432004601095	-0.0056407958980275	0.00590093868233542	0.00106425296763346	0.0209573187298073	-0.0400120917427889	0.0421405976780558	0.00119432435978742	0.0239006301322813	-0.0456509106994839	0.0480395594190587	0.000213828550550188	9.97875727883164e-05	1.82449078850876e-05	0.000409412193215288
18	PreTest, EntryTest, ExitTest, TestEvery3Days, PCR 0D	9	9.19646370707175e-05	0.00290817717334223	-0.00560806262268005	0.00579199189682148	0.000746889462587298	0.0227114496331969	-0.0437675518184787	0.0452613307436533	0.000838854099658015	0.0256196056564375	-0.0493755729869595	0.0510532811862755	0.000159101436213059	8.75648468346454e-05	-1.25256635828457e-05	0.000330728536008964
18	PreTest, EntryTest, ExitTest, TestEvery3Days, PCR 0D	10	0	0	0	0	4.13292881757889e-06	1.57362057746677e-05	-2.67100345007698e-05	3.49758921359275e-05	4.13292881757889e-06	1.57362057746677e-05	-2.67100345007698e-05	3.49758921359275e-05	5.12512586248167e-05	5.0635334138054e-05	-4.79939962857692e-05	0.000150496513535403
18	PreTest, EntryTest, ExitTest, TestEvery3Days, PCR 0D	11	0	0	0	0	5.70235916678608e-07	1.93194170701734e-06	-3.21636982907538e-06	4.3568416624326e-06	5.70235916678608e-07	1.93194170701734e-06	-3.21636982907538e-06	4.3568416624326e-06	1.29207944133674e-05	2.4669560975723e-05	-3.54315450990497e-05	6.12731339257844e-05
18	PreTest, EntryTest, ExitTest, TestEvery3Days, PCR 0D	12	0	0	0	0	8.26843992906062e-08	3.91854666054799e-07	-6.85350746176799e-07	8.50719544758012e-07	8.26843992906062e-08	3.91854666054799e-07	-6.85350746176799e-07	8.50719544758012e-07	2.76567672102445e-06	1.11516044932584e-05	-1.90914680857621e-05	2.4622821527811e-05
18	PreTest, EntryTest, ExitTest, TestEvery3Days, PCR 0D	13	0	0	0	0	1.32315906829555e-08	1.83434914842698e-07	-3.46300842408732e-07	3.72764023774643e-07	1.32315906829555e-08	1.83434914842698e-07	-3.46300842408732e-07	3.72764023774643e-07	4.76724894472912e-07	4.7457765615825e-06	-8.82499716622879e-06	9.77844695517461e-06
18	PreTest, EntryTest, ExitTest, TestEvery3Days, PCR 0D	14	0	0	0	0	1.21880417025224e-09	3.85419719970872e-08	-7.43234609440387e-08	7.67610692845432e-08	1.21880417025224e-09	3.85419719970872e-08	-7.43234609440387e-08	7.67610692845432e-08	4.79409367659044e-08	1.51602553342364e-06	-2.92346910874444e-06	3.01935098227625e-06
18	PreTest, EntryTest, ExitTest, TestEvery3Days, PCR 0D	15	0	0	0	0	0	0	0	0	0	0	0	0	0	0	0	0
18	PreTest, EntryTest, ExitTest, TestEvery3Days, PCR 0D	16	0	0	0	0	0	0	0	0	0	0	0	0	0	0	0	0
18	PreTest, EntryTest, ExitTest, TestEvery3Days, PCR 0D	17	0	0	0	0	0	0	0	0	0	0	0	0	0	0	0	0
18	PreTest, EntryTest, ExitTest, TestEvery3Days, PCR 0D	18	0	0	0	0	0	0	0	0	0	0	0	0	0	0	0	0
18	PreTest, EntryTest, ExitTest, TestEvery3Days, PCR 0D	19	0	0	0	0	0	0	0	0	0	0	0	0	0	0	0	0
18	PreTest, EntryTest, ExitTest, TestEvery3Days, PCR 0D	20	0	0	0	0	0	0	0	0	0	0	0	0	0	0	0	0
18	PreTest, EntryTest, ExitTest, TestEvery3Days, PCR 0D	21	0	0	0	0	0	0	0	0	0	0	0	0	0	0	0	0
19	PreTest, EntryTest, ExitTest, TestEvery3Days, Antigen	0	682.71177593753	16.693394667501	649.992722389228	715.430829485832	2156.8825731119	32.344475096857	2093.48740192206	2220.27774430174	2839.59434904943	38.9212903832861	2763.30861989819	2915.88007820067	0.327999614044697	0.00330032068527374	0.321530985501561	0.334468242587834
19	PreTest, EntryTest, ExitTest, TestEvery3Days, Antigen	1	250.316699105725	10.1566810109669	230.40960432423	270.22379388722	797.808141927007	20.4099912612302	757.804559054996	837.811724799018	1048.12484103273	25.1914504745086	998.749598102695	1097.50008396277	0.122238697772826	0.00226713079852195	0.117795121407723	0.126682274137929
19	PreTest, EntryTest, ExitTest, TestEvery3Days, Antigen	2	77.006358663354	5.59501318408984	66.0401328225379	87.97258450417	253.808061217699	11.2444203305021	231.768997369915	275.847125065483	330.814419881053	13.5770696599827	304.203363347486	357.425476414619	0.0414888955538408	0.00134438346093149	0.0388539039704151	0.0441238871372666
19	PreTest, EntryTest, ExitTest, TestEvery3Days, Antigen	3	13.1099707971725	2.17949676369466	8.83815714033092	17.381784454014	49.5253103965134	5.37744789291539	38.9855125263992	60.0651082666276	62.6352811936859	6.30201014194654	50.2833413154706	74.9872210719011	0.00891364607734417	0.000666593885200766	0.00760712206235067	0.0102201700923377
19	PreTest, EntryTest, ExitTest, TestEvery3Days, Antigen	4	0.191935310146746	0.264870213884464	-0.327210309066804	0.711080929360295	0.850338758774985	0.644829012950947	-0.413526106608871	2.11420362415884	1.04227406892173	0.748222050480173	-0.424241150019408	2.50878928786287	0.000674367244534813	0.000186196814441487	0.000309421488229498	0.00103931300084013
19	PreTest, EntryTest, ExitTest, TestEvery3Days, Antigen	5	0.055605260454129	0.13784068135413	-0.214562474999967	0.325772995908225	0.287780565757879	0.370269395095918	-0.437947448630119	1.01350858014588	0.343385826212008	0.427357239121752	-0.494234362466627	1.18100601489064	0.000303510213576956	0.000124624954367829	5.92453030160109e-05	0.000547775124137902
19	PreTest, EntryTest, ExitTest, TestEvery3Days, Antigen	6	0.0148814772464851	0.0677015365889212	-0.1178135344678	0.147576488960771	0.0993954799646693	0.195484828250724	-0.28375478340675	0.482545743336088	0.114276957211154	0.2223212990323	-0.321472788892153	0.550026703314462	0.000488052436219002	0.000150148870703512	0.000193760649640119	0.000782344222797885
19	PreTest, EntryTest, ExitTest, TestEvery3Days, Antigen	7	0	0	0	0	0.00248178055244226	0.0288212014932047	-0.0540077743742389	0.0589713354791234	0.00248178055244226	0.0288212014932047	-0.0540077743742389	0.0589713354791234	0.000466429343459177	0.000147755595256657	0.00017682837675613	0.000756030310162224
19	PreTest, EntryTest, ExitTest, TestEvery3Days, Antigen	8	0	0	0	0	0.000391931781657442	0.00112437628990418	-0.00181184574655476	0.00259570930986964	0.000391931781657442	0.00112437628990418	-0.00181184574655476	0.00259570930986964	0.000562963531424308	0.000158359746949498	0.000252578427403291	0.000873348635445325
19	PreTest, EntryTest, ExitTest, TestEvery3Days, Antigen	9	0	0	0	0	0.000140514327661293	0.00168652106365288	-0.00316506695709835	0.00344609561242094	0.000140514327661293	0.00168652106365288	-0.00316506695709835	0.00344609561242094	0.000393969253306556	0.000139670371423075	0.000120215325317329	0.000667723181295782
19	PreTest, EntryTest, ExitTest, TestEvery3Days, Antigen	10	0	0	0	0	1.72866509166336e-05	0.000116643957220623	-0.000211335505235787	0.000245908807069054	1.72866509166336e-05	0.000116643957220623	-0.000211335505235787	0.000245908807069054	0.000131650858108826	8.12104695760334e-05	-2.75216622601991e-05	0.000290823378477852
19	PreTest, EntryTest, ExitTest, TestEvery3Days, Antigen	11	0	0	0	0	2.33429240815811e-06	1.76244129983446e-05	-3.22095570685974e-05	3.68781418849136e-05	2.33429240815811e-06	1.76244129983446e-05	-3.22095570685974e-05	3.68781418849136e-05	3.02701667710506e-05	3.75487450463596e-05	-4.33253735198142e-05	0.000103865707061915
19	PreTest, EntryTest, ExitTest, TestEvery3Days, Antigen	12	0	0	0	0	3.15052911841507e-07	2.77811203874067e-06	-5.13004668409021e-06	5.76015250777323e-06	3.15052911841507e-07	2.77811203874067e-06	-5.13004668409021e-06	5.76015250777323e-06	6.48282529533424e-06	1.70278979144067e-05	-2.6891854616903e-05	3.98575052075714e-05
19	PreTest, EntryTest, ExitTest, TestEvery3Days, Antigen	13	0	0	0	0	3.73682794812767e-08	4.70588174887302e-07	-8.84984543297835e-07	9.59721102260388e-07	3.73682794812767e-08	4.70588174887302e-07	-8.84984543297835e-07	9.59721102260388e-07	9.04721789902208e-07	6.50429350641662e-06	-1.18436934826744e-05	1.36531370624788e-05
19	PreTest, EntryTest, ExitTest, TestEvery3Days, Antigen	14	0	0	0	0	7.7735226058811e-09	1.22738931016284e-07	-2.32794782186036e-07	2.48341827397798e-07	7.7735226058811e-09	1.22738931016284e-07	-2.32794782186036e-07	2.48341827397798e-07	2.38052098905216e-07	3.35983407598163e-06	-6.34722269001878e-06	6.82332688782921e-06
19	PreTest, EntryTest, ExitTest, TestEvery3Days, Antigen	15	0	0	0	0	5.33975514169799e-10	1.68857883953608e-08	-3.25621697407374e-08	3.3630120769077e-08	5.33975514169799e-10	1.68857883953608e-08	-3.25621697407374e-08	3.3630120769077e-08	4.74991687645466e-08	1.50205560260693e-06	-2.89652981234505e-06	2.99152814987414e-06
19	PreTest, EntryTest, ExitTest, TestEvery3Days, Antigen	16	0	0	0	0	0	0	0	0	0	0	0	0	0	0	0	0
19	PreTest, EntryTest, ExitTest, TestEvery3Days, Antigen	17	0	0	0	0	0	0	0	0	0	0	0	0	0	0	0	0
19	PreTest, EntryTest, ExitTest, TestEvery3Days, Antigen	18	0	0	0	0	0	0	0	0	0	0	0	0	0	0	0	0
19	PreTest, EntryTest, ExitTest, TestEvery3Days, Antigen	19	0	0	0	0	0	0	0	0	0	0	0	0	0	0	0	0
19	PreTest, EntryTest, ExitTest, TestEvery3Days, Antigen	20	0	0	0	0	0	0	0	0	0	0	0	0	0	0	0	0
19	PreTest, EntryTest, ExitTest, TestEvery3Days, Antigen	21	0	0	0	0	0	0	0	0	0	0	0	0	0	0	0	0
20	PreTest, EntryTest, ExitTest, TestEvery3Days, PCR 1D	0	750.542868125345	17.4597267075669	716.321803778514	784.763932472176	2373.90435157309	33.9971260832853	2307.26998444985	2440.53871869633	3124.44721969844	40.66178530436	3044.75012050189	3204.14431889498	0.306563975125608	0.00311442846544893	0.300459695333328	0.312668254917888
20	PreTest, EntryTest, ExitTest, TestEvery3Days, PCR 1D	1	702.128082027735	16.5074877101641	669.773406115813	734.482757939657	2370.92020060046	33.9434264288121	2304.39108479998	2437.44931640093	3073.04828262819	40.164632695747	2994.32560254453	3151.77096271185	0.272069373441276	0.00301443958732605	0.266161071850117	0.277977675032435
20	PreTest, EntryTest, ExitTest, TestEvery3Days, PCR 1D	2	154.914555483117	7.58452529876815	140.048885897531	169.780225068702	529.808951029278	16.8024501028801	496.876148827633	562.741753230923	684.723506512394	19.9033158282712	645.713007488983	723.734005535806	0.0584941570124372	0.00160817180756376	0.0553421402696123	0.0616461737552622
20	PreTest, EntryTest, ExitTest, TestEvery3Days, PCR 1D	3	35.5607230919485	3.43444197113036	28.829216828533	42.292229355364	154.175270399151	9.16850629869618	136.204998053706	172.145542744595	189.735993491099	10.5898532584319	168.979881104573	210.492105877626	0.0164470520554142	0.000893264092270631	0.0146962544345638	0.0181978496762647
20	PreTest, EntryTest, ExitTest, TestEvery3Days, PCR 1D	4	5.29092066623365	1.24711297207364	2.84657924096931	7.73526209149799	27.8967898696227	4.02172277737094	20.0142132259756	35.7793665132697	33.1877105358563	4.64049156072246	24.0923470768403	42.2830739948724	0.00331512826454029	0.000416566859974932	0.00249865721898942	0.00413159931009115
20	PreTest, EntryTest, ExitTest, TestEvery3Days, PCR 1D	5	0.0806400194790832	0.165842422168369	-0.244411127970919	0.405691166929086	0.407912644770954	0.468154233174964	-0.509669652251976	1.32549494179388	0.488552664250037	0.540507320190168	-0.570841683322692	1.54794701182277	0.000106434109585869	7.1908055551149e-05	-3.45056792943832e-05	0.000247373898466121
20	PreTest, EntryTest, ExitTest, TestEvery3Days, PCR 1D	6	0.0217257437447248	0.0833052565764955	-0.141552559145206	0.185004046634656	0.114067499747205	0.240539415763708	-0.357389755149662	0.585524754644072	0.13579324349193	0.277935370740809	-0.408960083160055	0.680546570143915	0.000128907096709523	7.87311375905089e-05	-2.54059329678741e-05	0.000283220126386921
20	PreTest, EntryTest, ExitTest, TestEvery3Days, PCR 1D	7	0.00395791815728829	0.0366851423613924	-0.0679449608710407	0.0758607971856173	0.0212415935819211	0.0985252014841519	-0.171867801327017	0.214350988490859	0.0251995117392094	0.113735101937832	-0.197721288058942	0.248120311537361	0.000243654051568854	0.000107309718350892	3.33270036011069e-05	0.000453981099536602
20	PreTest, EntryTest, ExitTest, TestEvery3Days, PCR 1D	8	0.000122973631302139	0.00388876767056536	-0.00749901100300597	0.00774495826561025	0.000685935255525356	0.0192500813693424	-0.0370442242283857	0.0384160947394365	0.000808908886827495	0.0231383818039815	-0.0445423194489763	0.0461601372226313	0.000163506385003446	8.80795207290407e-05	-9.12947562547333e-06	0.000336142245632366
20	PreTest, EntryTest, ExitTest, TestEvery3Days, PCR 1D	9	7.54756400543314e-05	0.00238674930430722	-0.00460255299638782	0.00475350427649648	0.000426751949899884	0.0128922171552543	-0.0248419936743986	0.0256954975741983	0.000502227589954216	0.0152789466674116	-0.0294445078781725	0.0304489630580809	0.000127270088051491	7.65821898891878e-05	-2.2831004131317e-05	0.000277371180234299
20	PreTest, EntryTest, ExitTest, TestEvery3Days, PCR 1D	10	9.19645965789453e-05	0.00290817589287996	-0.00560806015346578	0.00579198934662367	0.000715152663556236	0.0224818624373099	-0.0433492977135712	0.0447796030406836	0.000807117260135181	0.0253900377463051	-0.0489573567226228	0.0505715912428932	5.45384118527391e-05	5.01080187673168e-05	-4.36733049312019e-05	0.00015275012863668
20	PreTest, EntryTest, ExitTest, TestEvery3Days, PCR 1D	11	0	0	0	0	5.25227508425665e-07	2.99053259469803e-06	-5.33621637718248e-06	6.38667139403381e-06	5.25227508425665e-07	2.99053259469803e-06	-5.33621637718248e-06	6.38667139403381e-06	1.01065875850101e-05	2.24235731759155e-05	-3.38436158397842e-05	5.40567910098044e-05
20	PreTest, EntryTest, ExitTest, TestEvery3Days, PCR 1D	12	0	0	0	0	5.68121717535055e-08	3.22193821596781e-07	-5.74687718576185e-07	6.88312062083196e-07	5.68121717535055e-08	3.22193821596781e-07	-5.74687718576185e-07	6.88312062083196e-07	2.00371112567188e-06	9.8106123585257e-06	-1.72250890970385e-05	2.12325113483823e-05
20	PreTest, EntryTest, ExitTest, TestEvery3Days, PCR 1D	13	0	0	0	0	5.23064791223608e-09	6.2940680482907e-08	-1.18133085834262e-07	1.28594381658734e-07	5.23064791223608e-09	6.2940680482907e-08	-1.18133085834262e-07	1.28594381658734e-07	3.34243551799882e-07	3.9830048272074e-06	-7.47244590952661e-06	8.14093301312638e-06
20	PreTest, EntryTest, ExitTest, TestEvery3Days, PCR 1D	14	0	0	0	0	1.21880417025224e-09	3.85419719970872e-08	-7.43234609440387e-08	7.67610692845432e-08	1.21880417025224e-09	3.85419719970872e-08	-7.43234609440387e-08	7.67610692845432e-08	4.79409367659044e-08	1.51602553342364e-06	-2.92346910874444e-06	3.01935098227625e-06
20	PreTest, EntryTest, ExitTest, TestEvery3Days, PCR 1D	15	0	0	0	0	0	0	0	0	0	0	0	0	0	0	0	0
20	PreTest, EntryTest, ExitTest, TestEvery3Days, PCR 1D	16	0	0	0	0	0	0	0	0	0	0	0	0	0	0	0	0
20	PreTest, EntryTest, ExitTest, TestEvery3Days, PCR 1D	17	0	0	0	0	0	0	0	0	0	0	0	0	0	0	0	0
20	PreTest, EntryTest, ExitTest, TestEvery3Days, PCR 1D	18	0	0	0	0	0	0	0	0	0	0	0	0	0	0	0	0
20	PreTest, EntryTest, ExitTest, TestEvery3Days, PCR 1D	19	0	0	0	0	0	0	0	0	0	0	0	0	0	0	0	0
20	PreTest, EntryTest, ExitTest, TestEvery3Days, PCR 1D	20	0	0	0	0	0	0	0	0	0	0	0	0	0	0	0	0
20	PreTest, EntryTest, ExitTest, TestEvery3Days, PCR 1D	21	0	0	0	0	0	0	0	0	0	0	0	0	0	0	0	0
21	PreTest, EntryTest, ExitTest, TestEvery3Days, PCR 2D	0	805.852802087825	18.5675765570012	769.460352036102	842.245252139547	2552.97885571239	35.9400208680957	2482.53641481092	2623.42129661386	3358.83165780021	42.9403449813738	3274.66858163672	3442.99473396371	0.302665569076643	0.00308828524612507	0.296612529994238	0.308718608159048
21	PreTest, EntryTest, ExitTest, TestEvery3Days, PCR 2D	1	747.979223312643	17.3863113612711	713.902053044551	782.056393580734	2543.30889765119	35.8192887727405	2473.10309165661	2613.51470364576	3291.28812096383	42.2821642994333	3208.41507893694	3374.16116299072	0.277935649169363	0.00305328615069401	0.271951208314002	0.283920090024723
21	PreTest, EntryTest, ExitTest, TestEvery3Days, PCR 2D	2	523.544726096448	13.8598283721234	496.379462487086	550.70998970581	2286.33960633688	33.3628741860897	2220.94837293215	2351.73083974162	2809.88433243333	39.1703744815445	2733.1103984495	2886.65826641716	0.240738403110744	0.00297520290143481	0.234907005423932	0.246569800797556
21	PreTest, EntryTest, ExitTest, TestEvery3Days, PCR 2D	3	98.9852027395603	5.51387688057941	88.1780040536246	109.792401425496	510.844001664055	16.2398584321392	479.013879137062	542.674124191048	609.829204403615	18.7455568650083	573.087912948199	646.570495859032	0.0517589156383825	0.00154096444343371	0.0487386253292524	0.0547792059475126
21	PreTest, EntryTest, ExitTest, TestEvery3Days, PCR 2D	4	17.1577419178845	2.18430109520695	12.8765117712789	21.4389720644901	107.106740517003	7.31585175478168	92.7676710776309	121.445809956375	124.264482434887	8.27659786571043	108.042350618095	140.48661425168	0.0127096944691758	0.000779200597279406	0.0111824612985081	0.0142369276398434
21	PreTest, EntryTest, ExitTest, TestEvery3Days, PCR 2D	5	2.21802172541283	0.754983540343048	0.738253986340453	3.6977894644852	15.3226207284921	2.60188285910769	10.2229303246411	20.4223111323432	17.540642453905	2.91708563813812	11.8231546031542	23.2581303046557	0.00250829878072559	0.000341532280486657	0.00183889551097174	0.00317770205047943
21	PreTest, EntryTest, ExitTest, TestEvery3Days, PCR 2D	6	0.0521019559143158	0.125682370662931	-0.194235490585028	0.29843940241366	0.310843102841977	0.398045989375489	-0.469327036333982	1.09101324201793	0.362945058756293	0.455978350221274	-0.530772507677404	1.25666262518999	9.62501896781183e-05	6.65150227151048e-05	-3.41192548434872e-05	0.000226619634199724
21	PreTest, EntryTest, ExitTest, TestEvery3Days, PCR 2D	7	0.00680506764958154	0.0355846661829008	-0.062940878068904	0.0765510133680671	0.0682644473957434	0.175670651330669	-0.276050029212367	0.412578924003854	0.0750695150453249	0.1919641114451	-0.301180143387071	0.451319173477721	0.000132594691806544	8.12776565272092e-05	-2.67095149867864e-05	0.000291898898599874
21	PreTest, EntryTest, ExitTest, TestEvery3Days, PCR 2D	8	0.00168317297422715	0.0164178100685908	-0.0304957347602109	0.0338620807086652	0.0140332559799489	0.0811396637803377	-0.145000485029513	0.173066996989411	0.0157164289541761	0.0902763178630505	-0.161225154057403	0.192658011965755	0.000226160875331112	0.000103063712218006	2.41559993838209e-05	0.000428165751278403
21	PreTest, EntryTest, ExitTest, TestEvery3Days, PCR 2D	9	0	0	0	0	9.31635950599099e-06	3.10392301691728e-05	-5.15205316255876e-05	7.01532506375696e-05	9.31635950599099e-06	3.10392301691728e-05	-5.15205316255876e-05	7.01532506375696e-05	8.94317659979727e-05	6.59864159490271e-05	-3.99016092621204e-05	0.000218765141258066
21	PreTest, EntryTest, ExitTest, TestEvery3Days, PCR 2D	10	0	0	0	0	3.46692915898221e-06	1.40463679586397e-05	-2.40639520399516e-05	3.09978103579161e-05	3.46692915898221e-06	1.40463679586397e-05	-2.40639520399516e-05	3.09978103579161e-05	3.8128041016105e-05	4.30022255457939e-05	-4.61563210536509e-05	0.000122412403085861
21	PreTest, EntryTest, ExitTest, TestEvery3Days, PCR 2D	11	0	0	0	0	7.86020663084532e-07	3.56780227644606e-06	-6.20687179874975e-06	7.77891312491882e-06	7.86020663084532e-07	3.56780227644606e-06	-6.20687179874975e-06	7.77891312491882e-06	1.29629130135538e-05	2.51510293205935e-05	-3.63331044548095e-05	6.22589304819172e-05
21	PreTest, EntryTest, ExitTest, TestEvery3Days, PCR 2D	12	0	0	0	0	3.62807136961596e-08	2.22719527959189e-07	-4.00249561103852e-07	4.72810988496171e-07	3.62807136961596e-08	2.22719527959189e-07	-4.00249561103852e-07	4.72810988496171e-07	1.62283376684263e-06	9.16627229314527e-06	-1.63430599277221e-05	1.95887274614074e-05
21	PreTest, EntryTest, ExitTest, TestEvery3Days, PCR 2D	13	0	0	0	0	4.44854735940842e-09	5.79130762535553e-08	-1.0906108209756e-07	1.17958176816377e-07	4.44854735940842e-09	5.79130762535553e-08	-1.0906108209756e-07	1.17958176816377e-07	2.85666230020638e-07	3.6787503410728e-06	-6.92468443848204e-06	7.49601689852332e-06
21	PreTest, EntryTest, ExitTest, TestEvery3Days, PCR 2D	14	0	0	0	0	7.4241987019597e-09	1.31055060438183e-07	-2.4944371975688e-07	2.64292117160799e-07	7.4241987019597e-09	1.31055060438183e-07	-2.4944371975688e-07	2.64292117160799e-07	2.38790143533222e-07	3.37024412270003e-06	-6.36688833695883e-06	6.84446862402528e-06
21	PreTest, EntryTest, ExitTest, TestEvery3Days, PCR 2D	15	0	0	0	0	0	0	0	0	0	0	0	0	0	0	0	0
21	PreTest, EntryTest, ExitTest, TestEvery3Days, PCR 2D	16	0	0	0	0	0	0	0	0	0	0	0	0	0	0	0	0
21	PreTest, EntryTest, ExitTest, TestEvery3Days, PCR 2D	17	0	0	0	0	0	0	0	0	0	0	0	0	0	0	0	0
21	PreTest, EntryTest, ExitTest, TestEvery3Days, PCR 2D	18	0	0	0	0	0	0	0	0	0	0	0	0	0	0	0	0
21	PreTest, EntryTest, ExitTest, TestEvery3Days, PCR 2D	19	0	0	0	0	0	0	0	0	0	0	0	0	0	0	0	0
21	PreTest, EntryTest, ExitTest, TestEvery3Days, PCR 2D	20	0	0	0	0	0	0	0	0	0	0	0	0	0	0	0	0
21	PreTest, EntryTest, ExitTest, TestEvery3Days, PCR 2D	21	0	0	0	0	0	0	0	0	0	0	0	0	0	0	0	0
