# Supplementary material for: Border Control for Infectious Respiratory Disease Pandemics: A Modelling Study for H1N1 and Four Strains of SARS-CoV-2
Source: Viruses. 2023 Apr 16;15(4):978. doi: 10.3390/v15040978 (PMC10144227; doi:10.3390/v15040978)
Supplement: Supplementary file 1 [file viruses-15-00978-s001.zip › Table S1.6 - Outcomes for Influenza A H1N1.csv]

StrategyNo	StrategyDescription	QDays	TR_Sympt_Mean	TR_Sympt_SD	TR_Sympt_2_5th_Percentile	TR_Sympt_97_5th_Percentile	TR_NoSympt_Mean	TR_NoSympt_SD	TR_NoSympt_2_5th_Percentile	TR_NoSympt_97_5th_Percentile	TR_Total_Mean	TR_Total_SD	TR_Total_2_5th_Percentile	TR_Total_97_5th_Percentile	Missed_Proportion_Mean	Missed_Proportion_SD	Missed_Proportion_2_5th_Percentile	Missed_Proportion_97_5th_Percentile
1	Quarantine Only	0	33420.964928655	3925.5350558737	25726.9162191425	41115.0136381674	42364.9078534946	9088.11860281135	24552.1953919843	60177.6203150048	75785.8727821496	9967.50409135927	56249.5647630854	95322.1808012137	0.940855713624088	0.00213112970427425	0.93667869940371	0.945032727844465
1	Quarantine Only	1	21683.6283529971	2570.62780013861	16645.1978647254	26722.0588412688	31631.5745225605	6658.20067908011	18581.5011915635	44681.6478535575	53315.2028755576	7290.06292590048	39026.6795407927	67603.7262103226	0.687896458459308	0.00430674564046132	0.679455237004004	0.696337679914612
1	Quarantine Only	2	11530.1238215832	1402.46886268875	8781.28485071328	14278.9627924532	22632.0342646682	4461.18452031894	13888.1126048431	31375.9559244933	34162.1580862514	4887.44097636898	24582.7737725682	43741.5423999346	0.46203045534023	0.00481272959872796	0.452597505326723	0.471463405353737
1	Quarantine Only	3	4945.0873821716	622.258238551039	3725.46123461156	6164.71352973164	15805.5210229013	2899.39028249252	10122.716069216	21488.3259765867	20750.6084050729	3134.81781892525	14606.3654799794	26894.8513301664	0.296969823674368	0.00435004467343934	0.288443736114426	0.305495911234309
1	Quarantine Only	4	1789.01876670933	244.566278467407	1309.66886091322	2268.36867250545	10749.1636430793	1901.98998523741	7021.26327201394	14477.0640141446	12538.1824097886	2013.20410284036	8592.30236822151	16484.0624513557	0.189859237137672	0.00366254311452101	0.182680652633211	0.197037821642133
1	Quarantine Only	5	597.95417356137	93.4316891638822	414.828062800161	781.080284322579	7460.25140956743	1326.56467909539	4860.18463854047	10060.3181805944	8058.2055831288	1370.144232823	5372.72288679573	10743.6882794619	0.128740534449159	0.00305173926855365	0.122759125482794	0.134721943415524
1	Quarantine Only	6	192.439772342706	38.4172032038962	117.14205406307	267.737490622343	5044.15765833265	926.1334977968	3228.93600265093	6859.37931401438	5236.59743067536	942.679720648359	3388.94517820458	7084.24968314614	0.0878217033034006	0.0025449729384511	0.0828335563440365	0.0928098502627648
1	Quarantine Only	7	65.0032611973825	18.793967932206	28.1670840502588	101.839438344506	3425.09477747568	654.932434718067	2141.42720542827	4708.76234952309	3490.09803867306	661.098695477336	2194.34459553748	4785.85148180864	0.0613725317411723	0.00214820132974674	0.0571620571348687	0.0655830063474759
1	Quarantine Only	8	22.0552516781062	9.90816690411812	2.63524454603465	41.4752588101777	2286.50613546281	461.196191191208	1382.56160072805	3190.45067019758	2308.56138714092	463.240355012953	1400.61029131553	3216.51248296631	0.0425434934942772	0.00184760143262044	0.0389221946863412	0.0461647923022133
1	Quarantine Only	9	7.68510157341126	5.78511233728071	-3.65371860765894	19.0239217544815	1517.60747373584	324.873124621864	880.856149476982	2154.35879799469	1525.29257530925	325.577807482636	887.160072643281	2163.42507797521	0.0294798826830699	0.00152089550054253	0.0264989275020066	0.0324608378641333
1	Quarantine Only	10	2.88436240825249	3.53646622489225	-4.04711139253632	9.81583620904129	1004.68166835652	230.042175093121	553.799005174001	1455.56433153904	1007.56603076477	230.315806255941	556.147050503127	1458.98501102641	0.0204545174128254	0.00129283585058197	0.0179205591456848	0.0229884756799661
1	Quarantine Only	11	1.1124449226761	2.14339137343856	-3.08860216926348	5.31349201461568	661.812974422935	165.833363458882	336.779582043526	986.846366802345	662.925419345611	165.952180173964	337.659146204642	988.191692486581	0.0141526167809654	0.00106601412211314	0.0120632291016237	0.0162420044603072
1	Quarantine Only	12	0.437890058823585	1.35791443672041	-2.22362223714842	3.09940235479559	435.168514986584	116.091703033988	207.628777039968	662.7082529332	435.606405045408	116.13732367922	207.977250634137	663.235559456679	0.00981645307265127	0.00089461843755838	0.00806300093503684	0.0115699052102657
1	Quarantine Only	13	0.200908929315586	0.913300875775993	-1.58916078720536	1.99097864583653	285.927170455575	83.4740020812346	122.318126376355	449.536214534794	286.12807938489	83.535409428285	122.398676905452	449.857481864329	0.00681672815031368	0.000746898670948104	0.00535280675525539	0.00828064954537196
1	Quarantine Only	14	0.0854995567230688	0.580725116719569	-1.05272167204729	1.22372078549342	187.398539182537	60.6193491813163	68.5846147871574	306.212463577917	187.48403873926	60.6738513525163	68.5632900883286	306.404787390192	0.0047322120448208	0.000627582730125907	0.00350214989377402	0.00596227419586758
1	Quarantine Only	15	0.0350690088426847	0.342094510148456	-0.63543623104829	0.705574248733659	123.123404156325	44.9053396087959	35.1089385230852	211.137869789565	123.158473165168	44.8999736251553	35.1545248598635	211.162421470472	0.00330226162321629	0.00052728617918953	0.00226878071200481	0.00433574253442777
1	Quarantine Only	16	0.0140081977391284	0.204718569050427	-0.387240197599708	0.415256593077965	80.7928364148625	33.2085762451837	15.7040269743025	145.881645855422	80.8068446126016	33.1998323837492	15.7351731404533	145.87851608475	0.00230959909964295	0.000444349834198956	0.001438673424613	0.00318052477467291
1	Quarantine Only	17	0.00694827544061661	0.155852689395353	-0.298522995774275	0.312419546655508	53.0331437102918	24.5871926243491	4.84224616656744	101.224041254016	53.0400919857324	24.5861326375507	4.85127201613292	101.228911955332	0.00162290229507645	0.000363841728513548	0.000909772507189898	0.00233603208296301
1	Quarantine Only	18	0.00297129059727034	0.0939604587761636	-0.18119120860401	0.187133789798551	35.0174680024136	18.3639448349857	-0.9758638741583	71.0107998789856	35.0204392930109	18.3632353495421	-0.971501992091682	71.0123805781135	0.00114936190801813	0.000307269307638195	0.000547114065047269	0.00175160975098899
1	Quarantine Only	19	0.00276406439977157	0.0874073910266434	-0.16855442201245	0.174082550811993	23.0098891902657	13.6530886192974	-3.75016450355719	49.7699428840887	23.0126532546655	13.653120612496	-3.74746314582665	49.7727696551577	0.000814830595325628	0.000258333782897272	0.000308496380846974	0.00132116480980428
1	Quarantine Only	20	0	0	0	0	15.2735741007322	10.4362183310586	-5.18141382814257	35.728562029607	15.2735741007322	10.4362183310586	-5.18141382814257	35.728562029607	0.000584607985142897	0.000223560181529906	0.000146430029344281	0.00102278594094151
1	Quarantine Only	21	0	0	0	0	10.0883398446943	8.0447512052353	-5.67937251756693	25.8560522069555	10.0883398446943	8.0447512052353	-5.67937251756693	25.8560522069555	0.000418701027302585	0.000191321337905456	4.371120500789e-05	0.000793690849597279
2	PreTest, EntryTest, PCR 0D	0	24304.1593789663	2853.07116128856	18712.1399028407	29896.1788550919	33688.8021679097	7010.38299303003	19948.4515015709	47429.1528342486	57992.961546876	7678.6441684127	42942.8189767871	73043.1041169649	0.724130553589301	0.00411414034876668	0.716066838505718	0.732194268672884
2	PreTest, EntryTest, PCR 0D	1	17717.3737288783	2091.54024394001	13617.9548507559	21816.7926070007	25897.44828317	5455.6106984698	15204.4513141692	36590.4452521708	43614.8220120483	5969.80203309479	31914.0100271825	55315.6339969141	0.562678072873854	0.00468302192906506	0.553499349892886	0.571856795854821
2	PreTest, EntryTest, PCR 0D	2	10043.0486489238	1222.91418848413	7646.13683949495	12439.9604583527	18710.1724327538	3744.10683287049	11371.7230403277	26048.62182518	28753.2210816777	4109.61168355611	20698.3821819077	36808.0599814476	0.387654997934416	0.00471028790963476	0.378422833631532	0.3968871622373
2	PreTest, EntryTest, PCR 0D	3	4431.90003917192	559.997392895543	3334.30514909666	5529.49492924719	13084.7644626957	2434.24971682078	8313.63501772693	17855.8939076644	17516.6645018676	2642.89576066049	12336.588810973	22696.7401927621	0.24971444398905	0.00420689933097672	0.241468921300336	0.257959966677765
2	PreTest, EntryTest, PCR 0D	4	1624.63454057192	223.656309798492	1186.26817336687	2063.00090777696	8900.40672528459	1590.2982118556	5783.42223004762	12017.3912205216	10525.0412658565	1692.05847498529	7208.60665488534	13841.4758768277	0.158806123757229	0.00345418118819982	0.152035928628357	0.165576318886101
2	PreTest, EntryTest, PCR 0D	5	545.912469933099	87.5397684625675	374.334523746467	717.490416119731	6209.92598342865	1108.50741366098	4037.25145265314	8382.60051420417	6755.83845336175	1149.18643707807	4503.43303668874	9008.24387003477	0.107650866379276	0.00285069551859038	0.102063503162838	0.113238229595713
2	PreTest, EntryTest, PCR 0D	6	176.132676145064	36.5929580154954	104.410478434694	247.854873855435	4217.51690994518	776.717690527655	2695.15023651097	5739.88358337938	4393.64958609024	792.501038473332	2840.34755068251	5946.95162149797	0.0735312951926529	0.00241156036798561	0.0688046368714011	0.0782579535139047
2	PreTest, EntryTest, PCR 0D	7	59.6773611580109	18.0897198931618	24.2215101674137	95.1332121486081	2882.20653226589	551.881283321348	1800.51921695605	3963.89384757573	2941.8838934239	557.520889404553	1849.14295019097	4034.62483665682	0.0516481888445821	0.00199685545139254	0.0477343521598527	0.0555620255293115
2	PreTest, EntryTest, PCR 0D	8	20.2572246681192	9.53838416245353	1.56199170971027	38.9524576265281	1934.1786159965	391.641308053505	1166.56165221163	2701.79557978137	1954.43584066462	393.551529080895	1183.07484366606	2725.79683766317	0.0359648317419704	0.00169044474419967	0.0326515600433391	0.0392781034406018
2	PreTest, EntryTest, PCR 0D	9	7.09839381567738	5.4983837299109	-3.67843829494798	17.8752259263027	1289.83453428091	277.500684521073	745.933192619601	1833.73587594221	1296.93292809658	278.194016526723	751.672655704206	1842.19320048896	0.0250321301621895	0.00139203185584003	0.022303747724743	0.0277605125996359
2	PreTest, EntryTest, PCR 0D	10	2.61360049530578	3.35991749098003	-3.97183778701507	9.19903877762663	858.283673827857	197.629142731515	470.930554074088	1245.63679358163	860.897274323163	197.917561206896	472.978854357647	1248.81569428868	0.0174554846123245	0.00118984191285598	0.0151233944631268	0.0197875747615222
2	PreTest, EntryTest, PCR 0D	11	1.0098072252702	2.03756172045297	-2.98381374681762	5.00342819735802	567.770611055263	143.319939626602	286.863529387122	848.677692723403	568.780418280533	143.455900733793	287.606852842298	849.953983718767	0.0121272257983676	0.00098675249099656	0.0101931909160143	0.0140612606807208
2	PreTest, EntryTest, PCR 0D	12	0.411605691092247	1.32834556927747	-2.19195162469159	3.01516300687609	375.04719251973	101.143502141139	176.805928323097	573.288456716363	375.458798210823	101.199923440121	177.106948268186	573.810648153459	0.00845121091577878	0.000836189164080916	0.00681228015418019	0.0100901416773774
2	PreTest, EntryTest, PCR 0D	13	0.188959727435299	0.889457873914703	-1.55437770543752	1.93229716030812	247.233720064778	72.865348318935	104.417637359666	390.049802769891	247.422679792214	72.9237579976959	104.49211411673	390.353245467697	0.00588846080127309	0.000692999428175724	0.00453018192204867	0.00724673968049751
2	PreTest, EntryTest, PCR 0D	14	0.0816993613358033	0.568701806616074	-1.0329561796317	1.19635490230331	162.538545934535	52.9413272236462	58.7735445761884	266.303547292881	162.620245295871	52.9909053111882	58.7580708859419	266.4824197058	0.00410073762427759	0.000576896459682906	0.00297002056329909	0.00523145468525609
2	PreTest, EntryTest, PCR 0D	15	0.0314760396529181	0.323025753722161	-0.601654437642517	0.664606516948353	106.946338659677	39.4639283696195	29.5970390552224	184.295638264131	106.97781469933	39.4567713378449	29.6425428771535	184.313086521506	0.00286542978239316	0.00048849451093767	0.00190798054095532	0.00382287902383099
2	PreTest, EntryTest, PCR 0D	16	0.0106224547468605	0.174695273861683	-0.331780282022037	0.353025191515758	70.5180382653196	29.2438038410367	13.2001827368877	127.835893793752	70.5286607200665	29.235056657449	13.2279496714664	127.829371768667	0.00201347416070569	0.000405126767026819	0.00121942569733313	0.00280752262407826
2	PreTest, EntryTest, PCR 0D	17	0.0037697586458475	0.119210235499901	-0.229882302933959	0.237421820225654	46.3037315614949	21.762174138653	3.6498702497351	88.9575928732547	46.3075013201408	21.7600898566188	3.65772520116783	88.9572774391137	0.00141546362450661	0.000335667176103515	0.000757555959343718	0.0020733712896695
2	PreTest, EntryTest, PCR 0D	18	0	0	0	0	30.6366542322911	16.4312313084372	-1.5685591322458	62.841867596828	30.6366542322911	16.4312313084372	-1.5685591322458	62.841867596828	0.00100467726157485	0.000289136120744926	0.000437970464914797	0.00157138405823491
2	PreTest, EntryTest, PCR 0D	19	0	0	0	0	20.2183331676444	12.2672648441307	-3.82550592685185	44.2621722621407	20.2183331676444	12.2672648441307	-3.82550592685185	44.2621722621407	0.000715102298798259	0.000242304390140341	0.000240185694123191	0.00119001890347333
2	PreTest, EntryTest, PCR 0D	20	0	0	0	0	13.3774311498009	9.41941225129507	-5.08461686273742	31.8394791623392	13.3774311498009	9.41941225129507	-5.08461686273742	31.8394791623392	0.00051096800095597	0.000208425424961691	0.000102454168031057	0.000919481833880884
2	PreTest, EntryTest, PCR 0D	21	0	0	0	0	8.88234752496076	7.32078022461475	-5.46638171528414	23.2310767652057	8.88234752496076	7.32078022461475	-5.46638171528414	23.2310767652057	0.000367668036577936	0.00017958685082233	1.56778089661682e-05	0.000719658264189703
3	PreTest, EntryTest, Antigen	0	30289.4470439882	3549.88567068854	23331.6711294387	37247.2229585378	40239.5902678663	8484.67697768167	23609.6233916102	56869.5571441224	70529.0373118545	9299.23316497258	52302.5403085083	88755.5343152008	0.877967150352546	0.00300469749526968	0.872077943261817	0.883856357443274
3	PreTest, EntryTest, Antigen	1	20736.4357215918	2450.97639227966	15932.5219927237	25540.34945046	30589.995891412	6413.12890800126	18020.2632317295	43159.7285510944	51326.4316130038	7018.25764647638	37570.6466259101	65082.2166000975	0.662438227218309	0.00435132445880304	0.653909631279055	0.670966823157563
3	PreTest, EntryTest, Antigen	2	11274.7013154402	1370.58495002763	8588.35481338605	13961.0478174944	21993.1309211605	4342.68329595769	13481.4716610834	30504.7901812375	33267.8322366007	4758.5582295276	23941.0581067266	42594.6063664748	0.449733692604181	0.00479304619576656	0.440339322060479	0.459128063147884
3	PreTest, EntryTest, Antigen	3	4870.96266999795	612.725928692759	3670.01984976014	6071.90549023576	15363.0825761318	2824.01039504204	9828.02220184936	20898.1429504141	20234.0452461297	3054.59010518989	14247.0486399575	26221.0418523019	0.289399601770297	0.00432423699220965	0.280924097265566	0.297875106275028
3	PreTest, EntryTest, Antigen	4	1767.15742296579	241.849926857018	1293.13156632604	2241.18327960555	10444.1366243482	1851.4563567973	6815.28216502551	14072.9910836709	12211.294047314	1961.35404043927	8367.04012805305	16055.547966575	0.184797399593919	0.00363443816373491	0.177673900792998	0.191920898394839
3	PreTest, EntryTest, Antigen	5	591.365149512271	93.0755235451065	408.937123363862	773.793175660679	7252.96647507489	1291.25100723413	4722.11450089599	9783.8184492538	7844.33162458716	1334.72640918998	5228.2678625748	10460.3953865995	0.125263972473898	0.00299757557731404	0.119388724342363	0.131139220605434
3	PreTest, EntryTest, Antigen	6	190.43797132157	38.298477395744	115.372955625912	265.502987017229	4906.67473627646	901.838705387065	3139.07087371782	6674.27859883511	5097.11270759804	918.419746875044	3297.01000372295	6897.21541147312	0.0854494081048754	0.00252451547276597	0.0805013577782541	0.0903974584314967
3	PreTest, EntryTest, Antigen	7	64.3309973671654	18.7160597337583	27.6475202889992	101.014474445332	3335.36769968344	638.948710034579	2083.02822801567	4587.70717135122	3399.69869705061	645.039913603615	2135.42046638752	4663.9769277137	0.0597623283775983	0.00210954225077025	0.0556276255660886	0.063897031189108
3	PreTest, EntryTest, Antigen	8	21.8207925926202	9.86300332257508	2.489306080373	41.1522791048673	2228.59642865037	450.787954339057	1345.05203814582	3112.14081915492	2250.41722124299	452.770745715487	1362.98655964064	3137.84788284535	0.0414577857857484	0.00180939024955729	0.0379113808966161	0.0450041906748807
3	PreTest, EntryTest, Antigen	9	7.60412989741828	5.73259953249157	-3.63176518626519	18.8400249811017	1480.36558329622	318.076366324385	856.935905300428	2103.79526129202	1487.96971319364	318.77276868563	863.175086569808	2112.76433981748	0.028748033714986	0.00149558598748751	0.0258166851795104	0.0316793822504615
3	PreTest, EntryTest, Antigen	10	2.85085087280691	3.49726240973789	-4.00378345027935	9.70548519589317	980.69169131203	225.076547698762	539.541657822456	1421.8417248016	983.542542184837	225.333288813123	541.889296111116	1425.19578825856	0.0199609174547831	0.00127618025609327	0.0174596041528402	0.0224622307567259
3	PreTest, EntryTest, Antigen	11	1.10132034280633	2.12412257374292	-3.0619599017298	5.26460058734245	646.813000968131	162.448686605399	328.413575221549	965.212426714713	647.914321310937	162.572833454707	329.271567739712	966.557074882163	0.0138289668387398	0.00106056077891628	0.0117502677120639	0.0159076659654157
3	PreTest, EntryTest, Antigen	12	0.434968658201642	1.35570683234112	-2.22221673318696	3.09215404959024	425.651975976061	113.933073405693	202.343152100903	648.96079985122	426.086944634263	113.982509902413	202.681225225533	649.492664042993	0.00959962872997946	0.000889971240263474	0.00785528509906305	0.0113439723608959
3	PreTest, EntryTest, Antigen	13	0.200908929315586	0.913300875775993	-1.58916078720536	1.99097864583653	279.807587646572	81.992001966119	119.103263792978	440.511911500165	280.008496575887	82.0564411084457	119.177872003334	440.839121148441	0.00666915197673102	0.000741846927406631	0.00521513199901403	0.00812317195444802
3	PreTest, EntryTest, Antigen	14	0.0854995567230688	0.580725116719569	-1.05272167204729	1.22372078549342	183.521524733132	59.5741083309301	66.756272404509	300.286777061755	183.607024289855	59.6285040865806	66.735156280157	300.478892299553	0.00463313544928895	0.000623152468696527	0.00341175661064376	0.00585451428793415
3	PreTest, EntryTest, Antigen	15	0.0350690088426847	0.342094510148456	-0.63543623104829	0.705574248733659	120.636761325531	44.2249795312993	33.9558014441841	207.317721206877	120.671830334373	44.2189315491302	34.0027244980782	207.340936170669	0.00323472707109132	0.000525593462025607	0.00220456388552113	0.00426489025666151
3	PreTest, EntryTest, Antigen	16	0.0140081977391284	0.204718569050427	-0.387240197599708	0.415256593077965	79.2033489953373	32.6700722924274	15.1700073021796	143.236690688495	79.2173571930764	32.661336252572	15.2011381380354	143.233576248117	0.00226392075397444	0.000441685764975502	0.00139821665462246	0.00312962485332643
3	PreTest, EntryTest, Antigen	17	0.00694827544061661	0.155852689395353	-0.298522995774275	0.312419546655508	51.9714079510659	24.2429360512886	4.45525329054031	99.4875626115915	51.9783562265065	24.2417431696555	4.46453961398179	99.4921728390312	0.0015901186837252	0.000361474107632064	0.000881629432766351	0.00229860793468404
3	PreTest, EntryTest, Antigen	18	0.00297129059727034	0.0939604587761636	-0.18119120860401	0.187133789798551	34.2977890891256	18.0659168762257	-1.11140798827667	69.706986166528	34.3007603797229	18.0653141741399	-1.10725540159127	69.7087761610371	0.00112621170407207	0.000305959141238894	0.000526531787243839	0.0017258916209003
3	PreTest, EntryTest, Antigen	19	0.00276406439977157	0.0874073910266434	-0.16855442201245	0.174082550811993	22.5650800323571	13.4330561798673	-3.76371008018285	48.893870144897	22.5678440967568	13.4331803147351	-3.76118932012388	48.8968775136376	0.000799568841676787	0.000256437471029444	0.000296951398459077	0.0013021862848945
3	PreTest, EntryTest, Antigen	20	0	0	0	0	14.9589328139149	10.236371767194	-5.1043558497853	35.0222214776152	14.9589328139149	10.236371767194	-5.1043558497853	35.0222214776152	0.000572991589663532	0.000221404350810697	0.000139039062074566	0.0010069441172525
3	PreTest, EntryTest, Antigen	21	0	0	0	0	9.87076061620722	7.87072093594086	-5.55585241823686	25.2973736506513	9.87076061620722	7.87072093594086	-5.55585241823686	25.2973736506513	0.000410207464228334	0.000189523832429115	3.87407526672681e-05	0.0007816741757894
4	PreTest, EntryTest, PCR 1D	0	27806.5804837657	3257.69072470354	21421.5066633468	34191.6543041846	35319.4708954034	7569.7058104928	20482.8475068375	50156.0942839693	63126.0513791691	8298.5258977329	46860.9406196126	79391.1621387256	0.783906154312719	0.00376847825541488	0.776519936932106	0.791292371693332
4	PreTest, EntryTest, PCR 1D	1	19249.2702612943	2276.90108255192	14786.5441394925	23711.996383096	26861.1817484733	5736.12619906953	15618.374398297	38103.9890986496	46110.4520097676	6281.73210419749	33798.2570855405	58422.6469339947	0.593344329696074	0.00461018876513331	0.584308359716413	0.602380299675736
4	PreTest, EntryTest, PCR 1D	2	10510.1440156444	1278.69387791963	8003.90401492198	13016.3840163669	19320.9866137069	3871.47015072866	11732.9051182787	26909.0681091351	29831.1306293514	4252.54615143006	21496.1401725484	38166.1210861543	0.401968169081455	0.0047668141263859	0.392625213393739	0.411311124769172
4	PreTest, EntryTest, PCR 1D	3	4551.44302192306	574.421791818067	3425.57630995965	5677.30973388647	13526.0206129421	2508.14835827715	8610.04983071893	18441.9913951654	18077.4636348652	2722.53397520975	12741.2970434541	23413.6302262763	0.25780778673071	0.00426771653410665	0.249443062323861	0.266172511137559
4	PreTest, EntryTest, PCR 1D	4	1653.53818420643	226.930529711112	1208.75434597265	2098.32202244021	9215.01211686832	1639.64605288206	6001.30585321948	12428.7183805172	10868.5503010748	1742.44208290783	7453.36381857541	14283.7367835741	0.16410376174785	0.00349650950652772	0.157250603115056	0.170956920380644
4	PreTest, EntryTest, PCR 1D	5	553.327923841344	88.4413808167247	379.982817440563	726.673030242124	6430.2541666369	1144.16462063474	4187.69151019281	8672.81682308099	6983.58209047824	1185.23591862272	4660.51968997772	9306.64449097877	0.111352655709609	0.00290141069837199	0.1056658907408	0.117039420678418
4	PreTest, EntryTest, PCR 1D	6	178.179359374699	36.888466374419	105.877965280838	250.480753468561	4362.86501306959	799.766144180623	2795.32337047557	5930.40665566361	4541.04437244429	815.569720597601	2942.52772007299	6139.56102481559	0.0760455383880621	0.00244911804464068	0.0712452670205664	0.0808458097555579
4	PreTest, EntryTest, PCR 1D	7	60.2575716571038	18.1109022626576	24.760203222295	95.7549400919127	2976.67579002932	567.312768852711	1864.742763078	4088.60881698063	3036.93336168642	572.996215826499	1913.86077866648	4160.00594470636	0.0533463225463114	0.00204564186237824	0.04933686449605	0.0573557805965727
4	PreTest, EntryTest, PCR 1D	8	20.4184002461381	9.57417508573048	1.65301707810637	39.1837834141699	1994.62001478873	402.976958247078	1204.78517662446	2784.45485295301	2015.03841503487	404.908747042965	1221.41727083066	2808.65955923908	0.0370962299119082	0.00173235566995145	0.0337008127988034	0.0404916470250131
4	PreTest, EntryTest, PCR 1D	9	7.14194646375609	5.50941214591974	-3.6565013422466	17.9403942697588	1328.45160405653	285.10569379815	769.644444212161	1887.25876390091	1335.59355052029	285.787744635537	775.449571034639	1895.73753000594	0.0257890055021242	0.0014170327165801	0.0230116213776272	0.0285663896266212
4	PreTest, EntryTest, PCR 1D	10	2.63722504781397	3.38442203584542	-3.99624214244306	9.270692238071	882.575641036101	202.924697242148	484.843234441491	1280.30804763071	885.212866083915	203.205909490457	486.929283482619	1283.49644868521	0.0179549426916654	0.00120751617304999	0.0155882109924874	0.0203216743908434
4	PreTest, EntryTest, PCR 1D	11	1.02851878382792	2.05659602180123	-3.0024094189025	5.05944698655833	582.859451109555	146.74596759162	295.23735462998	870.481547589131	583.887969893383	146.875087712108	296.012797977651	871.763141809115	0.01245439640436	0.000999997171032226	0.0104944019491368	0.0144143908595831
4	PreTest, EntryTest, PCR 1D	12	0.414515023876148	1.3306272112846	-2.19351431024167	3.02254435799397	384.411606250187	103.237260270276	182.066576120446	586.756636379928	384.826121274063	103.28836407602	182.380927685065	587.271314863062	0.00866630002145197	0.000850675353060175	0.00699897632945403	0.0103336237134499
4	PreTest, EntryTest, PCR 1D	13	0.188959727435299	0.889457873914703	-1.55437770543752	1.93229716030812	252.888261085176	74.284270110559	107.29109166848	398.485430501871	253.077220812611	74.338450402705	107.373858023309	398.780583601913	0.00602542189784074	0.000705084506592473	0.00464345626491949	0.00740738753076199
4	PreTest, EntryTest, PCR 1D	14	0.0816993613358033	0.568701806616074	-1.0329561796317	1.19635490230331	166.024302348111	53.8888409261751	60.4021741328074	271.646430563414	166.106001709446	53.9385953526266	60.3863548182983	271.825648600595	0.00419056074416366	0.000585722293739051	0.00304254504843511	0.0053385764398922
4	PreTest, EntryTest, PCR 1D	15	0.0314760396529181	0.323025753722161	-0.601654437642517	0.664606516948353	109.168046713862	40.1073824604057	30.5575770914667	187.778516336257	109.199522753515	40.1007296120627	30.6020927138718	187.796952793158	0.00292657062795973	0.000494285825559259	0.00195777040986358	0.00389537084605588
4	PreTest, EntryTest, PCR 1D	16	0.0106224547468605	0.174695273861683	-0.331780282022037	0.353025191515758	71.9449154455219	29.7117555431238	13.7098745809992	130.179956310045	71.9555379002688	29.7030265954981	13.7376057730925	130.173470027445	0.00205566824027866	0.000410569177279858	0.00125095265281014	0.00286038382774718
4	PreTest, EntryTest, PCR 1D	17	0.0037697586458475	0.119210235499901	-0.229882302933959	0.237421820225654	47.1621905985036	22.0088294016048	4.02488497135831	90.299496225649	47.1659603571495	22.0070834845444	4.03207672744252	90.2998439868565	0.00144308695531902	0.000338292859581959	0.000780032950538382	0.00210614096009966
4	PreTest, EntryTest, PCR 1D	18	0	0	0	0	31.1593200726111	16.5818883327806	-1.34118105963885	63.659821204861	31.1593200726111	16.5818883327806	-1.34118105963885	63.659821204861	0.00102303345494643	0.000289549631020589	0.000455516178146073	0.00159055073174678
4	PreTest, EntryTest, PCR 1D	19	0	0	0	0	20.5426315026722	12.3884286865042	-3.73868872287608	44.8239517282205	20.5426315026722	12.3884286865042	-3.73868872287608	44.8239517282205	0.000727479186849707	0.000243553147708468	0.000250115017341109	0.0012048433563583
4	PreTest, EntryTest, PCR 1D	20	0	0	0	0	13.5924297350488	9.50913250456297	-5.04546997389459	32.2303294439923	13.5924297350488	9.50913250456297	-5.04546997389459	32.2303294439923	0.00052005383159605	0.000209288520798991	0.000109848330830029	0.000930259332362072
4	PreTest, EntryTest, PCR 1D	21	0	0	0	0	9.00600515601767	7.34181599477782	-5.38395419374686	23.3959645057822	9.00600515601767	7.34181599477782	-5.38395419374686	23.3959645057822	0.000373815468921983	0.000180572408148986	1.98935489499712e-05	0.000727737388893995
5	PreTest, EntryTest, PCR 2D	0	29769.9954157289	3484.93765135354	22939.517619076	36600.4732123819	36787.9711609301	7965.66808402419	21175.2617162427	52400.6806056175	66557.966576659	8728.31323337059	49450.4726392527	83665.4605140654	0.825292078462906	0.00348632382690093	0.81845888376218	0.832125273163632
5	PreTest, EntryTest, PCR 2D	1	20300.8040795103	2403.60470822531	15589.7388513887	25011.8693076319	27984.5455652824	5998.93925798422	16226.6246196333	39742.4665109315	48285.3496447928	6569.52611493073	35409.0784595285	61161.620830057	0.620952009633073	0.00452148665479008	0.612089895789685	0.629814123476462
5	PreTest, EntryTest, PCR 2D	2	11041.748730346	1344.71581830913	8406.10572646009	13677.3917342319	20169.1033457108	4049.36512649474	12232.3476977811	28105.8589936404	31210.8520760568	4450.01438901106	22488.8238735951	39932.8802785184	0.420429248254623	0.00472623718860651	0.411165823364955	0.429692673144292
5	PreTest, EntryTest, PCR 2D	3	4780.2508048087	601.744794284073	3600.83100801191	5959.67060160548	14146.5624291853	2622.00694278255	9007.42882133148	19285.6960370391	18926.813233994	2845.96608699559	13348.7197034826	24504.9067645053	0.269909819692988	0.00420884555060474	0.261660482413802	0.278159156972173
5	PreTest, EntryTest, PCR 2D	4	1736.0330677725	237.734877445291	1270.07270797973	2201.99342756527	9632.98678467087	1709.84901909979	6281.68270723529	12984.2908621065	11369.0198524434	1817.54970709909	7806.62242652915	14931.4172783576	0.171672016113978	0.00347639939949012	0.164858273290977	0.178485758936978
5	PreTest, EntryTest, PCR 2D	5	580.99786105024	91.4245645563518	401.80571451979	760.190007580689	6722.35628033904	1195.21460700451	4379.73565061021	9064.97691006787	7303.35414138928	1237.90082879516	4877.06851695076	9729.63976582779	0.116465964313227	0.00291468409058786	0.110753183495675	0.122178745130779
5	PreTest, EntryTest, PCR 2D	6	186.92908971506	37.7545785485595	112.930115759884	260.928063670237	4557.81868057192	835.616574546206	2920.01019446135	6195.62716668248	4744.74777028698	851.790967957785	3075.23747308972	6414.25806748423	0.0794688673041123	0.00245017840231771	0.0746665176355696	0.084271216972655
5	PreTest, EntryTest, PCR 2D	7	63.1112001814839	18.3951090603948	27.0567864231101	99.1656139398576	3107.69707045174	594.663320922341	1942.15696144395	4273.23717945953	3170.80827063322	600.757205289863	1993.32414826509	4348.29239300136	0.0557032613318097	0.00206289187368619	0.0516599932593848	0.0597465294042347
5	PreTest, EntryTest, PCR 2D	8	21.3977245419165	9.72733804814388	2.33214196755446	40.4633071162785	2080.86811342106	420.799610683027	1256.10087648232	2905.63535035979	2102.26583796297	422.811281228452	1273.55572675521	2930.97594917074	0.0387105056607908	0.00175539161777081	0.03526993808996	0.0421510732316216
5	PreTest, EntryTest, PCR 2D	9	7.4639852285791	5.71366452970866	-3.73479724964988	18.6627677068081	1383.59936845653	296.758684477563	801.952346880504	1965.24639003255	1391.06335368511	297.484151362222	807.994417015153	1974.13229035506	0.0268669290770128	0.00145160961378681	0.0240217742339906	0.0297120839200349
5	PreTest, EntryTest, PCR 2D	10	2.77870260413126	3.45329638662199	-3.98975831364784	9.54716352191035	918.06111318079	210.820480137253	504.852972111774	1331.26925424981	920.839815784921	211.075870551907	507.131109503183	1334.54852206666	0.0186828895916771	0.0012364207980354	0.0162595048275277	0.0211062743558265
5	PreTest, EntryTest, PCR 2D	11	1.06608848799408	2.1138060820281	-3.076971432781	5.20914840876916	605.381786811633	152.091045365592	307.283337895073	903.480235728193	606.447875299627	152.199921269333	308.136029611735	904.759720987519	0.0129397447375095	0.00102244105336613	0.0109357602729119	0.0149437292021071
5	PreTest, EntryTest, PCR 2D	12	0.406397597129968	1.32073239378874	-2.18223789469596	2.9950330889559	398.880615648352	106.863380323733	189.428390213836	608.332841082867	399.287013245482	106.901825139019	189.759435973004	608.814590517959	0.00899282811119598	0.000856617793292587	0.00731385723634251	0.0106717989860495
5	PreTest, EntryTest, PCR 2D	13	0.181574256813939	0.87455746186412	-1.53255836843974	1.89570688206761	262.248646436734	76.9849563524258	111.358131985979	413.139160887488	262.430220693548	77.0387617785379	111.434247607613	413.426193779482	0.00624837966980337	0.000711735135750135	0.0048533788037331	0.00764338053587363
5	PreTest, EntryTest, PCR 2D	14	0.0854995567230688	0.580725116719569	-1.05272167204729	1.22372078549342	171.967288350584	55.9556091136454	62.2942944878393	281.640282213329	172.052787907307	56.0081901259715	62.2767352604032	281.828840554212	0.00433992250873551	0.000596176983532111	0.00317141562101257	0.00550842939645844
5	PreTest, EntryTest, PCR 2D	15	0.0350690088426847	0.342094510148456	-0.63543623104829	0.705574248733659	113.128977947362	41.7187958755904	31.3601380312046	194.897817863519	113.164046956204	41.7128151994367	31.4069291653085	194.9211647471	0.00303209662531109	0.000502868818871455	0.00204647374032303	0.00401771951029914
5	PreTest, EntryTest, PCR 2D	16	0.0140081977391284	0.204718569050427	-0.387240197599708	0.415256593077965	74.2968709330947	30.9475317962469	13.6397086124507	134.954033253739	74.3108791308338	30.9395951632648	13.6692726108348	134.952485650833	0.00212231800129152	0.0004251581294401	0.00128900806758892	0.00295562793499412
5	PreTest, EntryTest, PCR 2D	17	0.00694827544061661	0.155852689395353	-0.298522995774275	0.312419546655508	48.7289312336036	23.1039398937227	3.44520904190721	94.0126534253	48.7358795090442	23.1029338173311	3.45412922707522	94.0176297910132	0.0014898408026521	0.00035042250345564	0.000803012695879045	0.00217666890942515
5	PreTest, EntryTest, PCR 2D	18	0.00297129059727034	0.0939604587761636	-0.18119120860401	0.187133789798551	32.163908489	17.1865073212411	-1.52164586063249	65.8494628386325	32.1668797795973	17.1854254896947	-1.51655418020439	65.8503137393989	0.00105404829539986	0.000291251733330623	0.00048319489807184	0.00162490169272788
5	PreTest, EntryTest, PCR 2D	19	0.00276406439977157	0.0874073910266434	-0.16855442201245	0.174082550811993	21.1578455582265	12.7770492688851	-3.88517100878827	46.2008621252413	21.1606096226263	12.7765852310466	-3.88149743022504	46.2027166754776	0.000748365076936142	0.00024435540785991	0.000269428477530718	0.00122730167634157
5	PreTest, EntryTest, PCR 2D	20	0	0	0	0	14.0622282020583	9.74585644405825	-5.03965042829589	33.1641068324124	14.0622282020583	9.74585644405825	-5.03965042829589	33.1641068324124	0.000537465687730425	0.000212737797920785	0.000120499603805686	0.000954431771655164
5	PreTest, EntryTest, PCR 2D	21	0	0	0	0	9.27822668111674	7.50561118116876	-5.43277123397402	23.9892245962075	9.27822668111674	7.50561118116876	-5.43277123397402	23.9892245962075	0.000385156112504359	0.000181609993918034	2.92005244250121e-05	0.000741111700583707
6	PreTest, EntryTest, ExitTest, PCR 0D	0	24304.1593789663	2853.07116128856	18712.1399028407	29896.1788550919	33688.8021679097	7010.38299303003	19948.4515015709	47429.1528342486	57992.961546876	7678.6441684127	42942.8189767871	73043.1041169649	0.724130553589301	0.00411414034876668	0.716066838505718	0.732194268672884
6	PreTest, EntryTest, ExitTest, PCR 0D	1	12179.4339475722	1454.00709054226	9329.58005010936	15029.287845035	20586.8157292303	4156.35906545201	12440.3519609444	28733.2794975162	32766.2496768025	4539.09982045769	23869.6140287054	41662.8853248996	0.42630165892142	0.00470564189494028	0.417078600807337	0.435524717035503
6	PreTest, EntryTest, ExitTest, PCR 0D	2	4904.36064640801	608.401654827418	3711.89340294627	6096.82788986975	13933.0235335328	2555.81883598544	8923.61861500134	18942.4284520642	18837.3841799408	2755.91800636715	13435.7848874612	24238.9834724204	0.259033763372643	0.00423539831034809	0.250732382684361	0.267335144060925
6	PreTest, EntryTest, ExitTest, PCR 0D	3	1643.27715785688	218.547421174722	1214.92421235442	2071.63010335933	9752.46397210387	1693.27004290505	6433.65468800997	13071.2732561978	11395.7411299607	1780.22858680013	7906.49309983248	14884.989160089	0.166501534589026	0.00355729712123269	0.15952923223141	0.173473836946642
6	PreTest, EntryTest, ExitTest, PCR 0D	4	529.580981146803	82.5274476687354	367.827183716082	691.334778577525	6804.27055361434	1175.87068526434	4499.56401049622	9108.97709673245	7333.85153476114	1211.65458374474	4959.00855062144	9708.69451890084	0.113034095409358	0.00299309612784372	0.107167626998784	0.118900563819932
6	PreTest, EntryTest, ExitTest, PCR 0D	5	167.975722537856	35.7353250868055	97.9344853677176	238.016959707995	4882.39133218572	864.569141075489	3187.83581567776	6576.94684869368	5050.36705472358	878.716566273799	3328.08258482693	6772.65152462022	0.0817965018014063	0.00248545581140948	0.0769250084110437	0.0866679951917688
6	PreTest, EntryTest, ExitTest, PCR 0D	6	52.0545925657643	16.0576765839179	20.5815464612853	83.5276386702433	3373.37128013543	618.167226297505	2161.76351659232	4584.97904367854	3425.4258727012	622.688634881277	2204.95614833389	4645.8955970685	0.0580944019636383	0.00215002598100548	0.0538803510408675	0.062308452886409
6	PreTest, EntryTest, ExitTest, PCR 0D	7	17.3038460525959	8.95433942868121	-0.246659227619311	34.8543513328111	2337.40425330733	452.170397149736	1451.15027489385	3223.65823172082	2354.70809935993	453.688341656863	1465.47894971248	3243.93724900738	0.0418096034822298	0.00179725817750697	0.0382869774543162	0.0453322295101435
6	PreTest, EntryTest, ExitTest, PCR 0D	8	5.76928259490157	5.0038863681668	-4.03833468670536	15.5768998765085	1581.16854949642	322.002279611695	950.044081457498	2212.29301753534	1586.93783209132	322.707091631757	954.43193249308	2219.44373168957	0.0295178608845965	0.00155898572253222	0.0264622488684334	0.0325734729007596
6	PreTest, EntryTest, ExitTest, PCR 0D	9	1.99922357924078	2.90441897831607	-3.69343761825872	7.69188477674028	1065.03201172928	230.693432760085	612.872883519516	1517.19113993905	1067.03123530852	230.827088438936	614.610141968209	1519.45232864884	0.0208064024730937	0.00128316024101638	0.0182914084007016	0.0233213965454858
6	PreTest, EntryTest, ExitTest, PCR 0D	10	0.795478029401302	1.91350030359587	-2.95498256564661	4.54593862444921	713.071502750193	167.919763359736	383.94876656511	1042.19423893528	713.866980779594	167.989611545233	384.607342150938	1043.12661940825	0.0146163892028717	0.0010999873139273	0.0124604140675742	0.0167723643381692
6	PreTest, EntryTest, ExitTest, PCR 0D	11	0.275809358003935	1.04452305891169	-1.77145583746297	2.32307455347084	473.835780076758	120.359643380116	237.930879051731	709.740681101786	474.111589434762	120.397884273071	238.131736259544	710.091442609981	0.0102141992277377	0.000912199552873125	0.00842628810410634	0.012002110351369
6	PreTest, EntryTest, ExitTest, PCR 0D	12	0.0923320993844922	0.655286601782436	-1.19202964010908	1.37669383887807	313.991635080872	85.0839433754498	147.22710606499	480.756164096753	314.083967180256	85.0899180954097	147.307727713253	480.860206647259	0.00714737807356088	0.000770282900120256	0.00563762358932518	0.00865713255779658
6	PreTest, EntryTest, ExitTest, PCR 0D	13	0.0424892515726307	0.398523515406811	-0.738616838624719	0.82359534176998	208.504174817114	61.0587928997982	88.8289407335097	328.179408900719	208.546664068687	61.0662966468052	88.8567226409486	328.236605496425	0.00502202207128549	0.000636561772065443	0.00377436099803722	0.00626968314453375
6	PreTest, EntryTest, ExitTest, PCR 0D	14	0.0295506251238606	0.368027148457901	-0.691782585853626	0.750883836101347	137.466136495273	44.9467661083998	49.3704749228096	225.561798067737	137.495687120397	44.9969059375008	49.3017514828955	225.689622757899	0.00350899983269001	0.000537126221454704	0.00245623243863879	0.00456176722674123
6	PreTest, EntryTest, ExitTest, PCR 0D	15	0.0137930738390692	0.202094597417979	-0.382312337100169	0.409898484778307	90.3021960463751	33.2552246724471	25.1219556883789	155.482436404371	90.3159891202142	33.2519316224291	25.1422031402532	155.489775100175	0.00245273773136905	0.000457890654194675	0.00155527204914748	0.00335020341359061
6	PreTest, EntryTest, ExitTest, PCR 0D	16	0.00212687868366945	0.0672578094725623	-0.129698427882553	0.133952185249892	59.5691396750126	24.7811650370495	10.9980562023955	108.14022314763	59.5712665536963	24.7795771595444	11.0032953209893	108.139237786403	0.00172426359629096	0.000378819174173262	0.000981778014911371	0.00246674917767056
6	PreTest, EntryTest, ExitTest, PCR 0D	17	0.0037697586458475	0.119210235499901	-0.229882302933959	0.237421820225654	39.5704774597943	18.6051736707472	3.10433706512982	76.0366178544587	39.5742472184401	18.602183313743	3.11396792350381	76.0345265133764	0.00122791638705844	0.000317579579659536	0.000605460410925752	0.00185037236319113
6	PreTest, EntryTest, ExitTest, PCR 0D	18	0	0	0	0	25.9158938827702	13.6384187087439	-0.815406786367905	52.6471945519083	25.9158938827702	13.6384187087439	-0.815406786367905	52.6471945519083	0.000868746849741498	0.000267619408172284	0.000344212809723821	0.00139328088975917
6	PreTest, EntryTest, ExitTest, PCR 0D	19	0	0	0	0	17.2253998226146	10.265544848658	-2.89506808075514	37.3458677259844	17.2253998226146	10.265544848658	-2.89506808075514	37.3458677259844	0.00062134120943872	0.000222156480602992	0.000185914507456856	0.00105676791142058
6	PreTest, EntryTest, ExitTest, PCR 0D	20	0	0	0	0	11.2831479938795	7.96501549138229	-4.32828236922976	26.8945783569888	11.2831479938795	7.96501549138229	-4.32828236922976	26.8945783569888	0.000442238924206044	0.000191682320398678	6.6541576224636e-05	0.000817936272187453
6	PreTest, EntryTest, ExitTest, PCR 0D	21	0	0	0	0	7.46270618669824	5.95375608936882	-4.20665574846466	19.1320681218611	7.46270618669824	5.95375608936882	-4.20665574846466	19.1320681218611	0.000319733917959325	0.000166824238358293	-7.24158922292914e-06	0.000646709425141578
7	PreTest, EntryTest, ExitTest, Antigen	0	30289.4470439882	3549.88567068854	23331.6711294387	37247.2229585378	40239.5902678663	8484.67697768167	23609.6233916102	56869.5571441224	70529.0373118545	9299.23316497258	52302.5403085083	88755.5343152008	0.877967150352546	0.00300469749526968	0.872077943261817	0.883856357443274
7	PreTest, EntryTest, ExitTest, Antigen	1	19169.0039220066	2262.92467738089	14733.6715543401	23604.3362896732	29624.3009143201	6119.60458039727	17629.8759367414	41618.7258918987	48793.3048363267	6685.32857374007	35690.0608317962	61896.5488408573	0.631329349149486	0.00447593607184898	0.622556514448662	0.64010218385031
7	PreTest, EntryTest, ExitTest, Antigen	2	9677.83755582836	1181.00971848957	7363.0585075888	11992.6166040679	21075.1078998346	4051.36983095094	13134.4230311708	29015.7927684985	30752.945455663	4416.942568848	22095.7380207209	39410.152890605	0.417921751732307	0.00471242299511447	0.408685402661883	0.427158100802731
7	PreTest, EntryTest, ExitTest, Antigen	3	3900.99888018399	494.083137327322	2932.59593102244	4869.40182934554	14756.0533952902	2650.13082648817	9561.79697537344	19950.309815207	18657.0522754742	2838.41572164535	13093.7574610493	24220.3470898991	0.268664963618205	0.00427906828914257	0.260277989771485	0.277051937464924
7	PreTest, EntryTest, ExitTest, Antigen	4	1372.98773682957	192.558577375106	995.572925174362	1750.40254848478	10120.0400904922	1769.77059073251	6651.28973265648	13588.7904483279	11493.0278273218	1855.0671219085	7857.09626838111	15128.9593862624	0.17491929984751	0.00354907038798565	0.167963121887058	0.181875477807961
7	PreTest, EntryTest, ExitTest, Antigen	5	452.779991787615	74.8288114187368	306.11552140689	599.444462168339	7077.75494202705	1252.30735551747	4623.23252521281	9532.2773588413	7530.53493381467	1285.18514666284	5011.57204635551	10049.4978212738	0.120726884261912	0.00295245234041317	0.114940077674703	0.126513690849122
7	PreTest, EntryTest, ExitTest, Antigen	6	144.965972677328	31.9504094145755	82.3431702247599	207.588775129896	4807.39397780478	883.324295005046	3076.07835959489	6538.70959601467	4952.35995048211	896.176301508614	3195.85439952522	6708.86550143899	0.0832398350151811	0.00250233076730026	0.0783352667112726	0.0881444033190896
7	PreTest, EntryTest, ExitTest, Antigen	7	48.0216175449738	15.9052101608251	16.8474056297565	79.195829460191	3274.76387159594	627.453102990343	2044.95578973487	4504.57195345701	3322.78548914092	632.472605785185	2083.13918180195	4562.43179647988	0.0585215791396841	0.00208279275868327	0.0544393053326649	0.0626038529467033
7	PreTest, EntryTest, ExitTest, Antigen	8	16.4160668511845	8.43135522763892	-0.109389394987776	32.9415230973568	2192.03754358096	443.68158367217	1322.4216395835	3061.65344757841	2208.45361043214	445.020419636498	1336.21358794461	3080.69363291968	0.0407476022784461	0.00180181761022485	0.0372160397624054	0.0442791647944868
7	PreTest, EntryTest, ExitTest, Antigen	9	5.68159365493364	4.85253738429469	-3.82937961828395	15.1925669281512	1456.31304557462	312.725648954234	843.37077362432	2069.25531752491	1461.99463922955	313.295761564599	847.934946562937	2076.05433189616	0.028289404718503	0.00148033423678925	0.0253879496143961	0.0311908598226099
7	PreTest, EntryTest, ExitTest, Antigen	10	2.11570539230596	3.0334084345081	-3.82977513932991	8.06118592394184	965.86516377499	221.310136599909	532.097296039169	1399.63303151081	967.980869167296	221.434334209987	533.969574115722	1401.99216421887	0.0196731411928894	0.00126876627492212	0.017186359294042	0.0221599230917367
7	PreTest, EntryTest, ExitTest, Antigen	11	0.851147070761836	1.83564947321867	-2.74672589674675	4.44902003827043	637.58018416947	160.398191997452	323.199727854465	951.960640484475	638.431331240232	160.542358203671	323.768309161038	953.094353319427	0.013644141017008	0.00106190366208311	0.0115628098393251	0.0157254721946909
7	PreTest, EntryTest, ExitTest, Antigen	12	0.329546707004473	1.17113455501123	-1.96587702081754	2.62497043482648	419.384680811662	112.058831539211	199.749370994809	639.019990628515	419.714227518666	112.117245745768	199.964425856961	639.464029180372	0.00947001526720449	0.000885752206109447	0.00773394094322997	0.011206089591179
7	PreTest, EntryTest, ExitTest, Antigen	13	0.176638400495611	0.868192290688569	-1.52501848925398	1.87829529024521	276.004083000073	80.843977546191	117.549887009538	434.458278990607	276.180721400568	80.9267629784359	117.564265962834	434.797176838303	0.0065870435765839	0.00074064438097637	0.00513538058987021	0.00803870656329758
7	PreTest, EntryTest, ExitTest, Antigen	14	0.0795428799177057	0.565782659031671	-1.02939113178437	1.18847689161978	181.118509545447	58.8424224543097	65.7873615350001	296.449657555894	181.198052425365	58.9013612744392	65.751384327464	296.644720523266	0.00457881292839308	0.000622832960168702	0.00335806032646242	0.00579956553032373
7	PreTest, EntryTest, ExitTest, Antigen	15	0.0250351788095791	0.286932773111265	-0.5373530564885	0.587423414107658	119.043570460603	43.533938284194	33.7170514235831	204.370089497624	119.068605639413	43.5267528837805	33.7561699872032	204.381041291623	0.00319771101129004	0.000524753676989623	0.00216919380439038	0.0042262282181897
7	PreTest, EntryTest, ExitTest, Antigen	16	0.0140081977391284	0.204718569050427	-0.387240197599708	0.415256593077965	78.1242321294674	32.1181194563757	15.172717994971	141.075746263964	78.1382403272066	32.1097044965111	15.2032195140447	141.073261140368	0.00223835601716301	0.000439712262270911	0.00137651998311202	0.00310019205121399
7	PreTest, EntryTest, ExitTest, Antigen	17	0.00317851679476911	0.100513526525684	-0.193827995195571	0.200185028785109	51.2361879236983	23.8307418870235	4.52793382513216	97.9444420222644	51.2393664404931	23.8312457198509	4.53012482958531	97.9486080514008	0.00157087863824267	0.000358113436143039	0.000868976303402314	0.00227278097308303
7	PreTest, EntryTest, ExitTest, Antigen	18	0.00297129059727034	0.0939604587761636	-0.18119120860401	0.187133789798551	33.8438043412359	17.8129808692317	-1.06963816245815	68.75724684493	33.8467756318332	17.812445413841	-1.06561737929513	68.7591686429616	0.00111374934006665	0.000305026798938423	0.000515896814147339	0.00171160186598596
7	PreTest, EntryTest, ExitTest, Antigen	19	0.00276406439977157	0.0874073910266434	-0.16855442201245	0.174082550811993	22.2374997390414	13.2557794116443	-3.7438279077814	48.2188273858641	22.2402638034411	13.2559735804527	-3.74144441424608	48.2219720211284	0.000789759535700603	0.000256172850731019	0.000287660748267806	0.0012918583231334
7	PreTest, EntryTest, ExitTest, Antigen	20	0	0	0	0	14.7782086421762	10.1009449516878	-5.0196434631318	34.5760607474842	14.7782086421762	10.1009449516878	-5.0196434631318	34.5760607474842	0.000567700493194394	0.00022028375957887	0.000135944324419809	0.000999456661968978
7	PreTest, EntryTest, ExitTest, Antigen	21	0	0	0	0	9.78220866143049	7.78381440388186	-5.47406757017795	25.0384848930389	9.78220866143049	7.78381440388186	-5.47406757017795	25.0384848930389	0.000406836854565429	0.000189198965959737	3.60068812843444e-05	0.000777666827846513
8	PreTest, EntryTest, ExitTest, PCR 1D	0	27806.5804837657	3257.69072470354	21421.5066633468	34191.6543041846	35319.4708954034	7569.7058104928	20482.8475068375	50156.0942839693	63126.0513791691	8298.5258977329	46860.9406196126	79391.1621387256	0.783906154312719	0.00376847825541488	0.776519936932106	0.791292371693332
8	PreTest, EntryTest, ExitTest, PCR 1D	1	19249.2702612943	2276.90108255192	14786.5441394925	23711.996383096	26861.1817484733	5736.12619906953	15618.374398297	38103.9890986496	46110.4520097676	6281.73210419749	33798.2570855405	58422.6469339947	0.593344329696074	0.00461018876513331	0.584308359716413	0.602380299675736
8	PreTest, EntryTest, ExitTest, PCR 1D	2	7819.64334043392	955.114418456823	5947.61908025855	9691.6676006093	15450.4452626737	3045.74875848932	9480.7776960346	21420.1128293127	23270.0886031076	3338.71504921362	16726.2071066489	29813.9700995663	0.314449467461029	0.00444545574555142	0.305736374199748	0.32316256072231
8	PreTest, EntryTest, ExitTest, PCR 1D	3	2650.91367188547	344.05347392865	1976.56886298532	3325.25848078563	10252.8253516891	1836.63889046578	6653.01312637621	13852.6375770021	12903.7390235746	1969.01732924004	9044.46505826414	16763.0129888851	0.185683048054857	0.00374896637794573	0.178335073954083	0.193031022155631
8	PreTest, EntryTest, ExitTest, PCR 1D	4	767.884286272403	112.962042620935	546.478682735371	989.289889809435	6859.94824599013	1199.34850483427	4509.22517651495	9210.6713154653	7627.83253226253	1245.91757951206	5185.8340764189	10069.8309881062	0.11648271491546	0.00296513915418367	0.11067104217326	0.12229438765766
8	PreTest, EntryTest, ExitTest, PCR 1D	5	220.584802224107	41.1860357058516	139.860172240638	301.309432207576	4811.32488165286	854.117906090896	3137.2537857147	6485.39597759101	5031.90968387696	870.124722356353	3326.46522805851	6737.35413969542	0.0811034513545448	0.0025664678113344	0.0760731744443294	0.0861337282647603
8	PreTest, EntryTest, ExitTest, PCR 1D	6	64.5394234546872	19.1213091971565	27.0616574282605	102.017189481114	3292.35640835858	606.388572256601	2103.83480673565	4480.87800998152	3356.89583181327	612.571214953402	2156.2562505046	4557.53541312194	0.0567736147077782	0.00210038986284787	0.0526568505765964	0.06089037883896
8	PreTest, EntryTest, ExitTest, PCR 1D	7	20.0668599424752	9.77438705473212	0.909061315200262	39.2246585697502	2276.46274324827	433.767393567316	1426.27865185633	3126.64683464021	2296.52960319074	435.668895315676	1442.61856837202	3150.44063800947	0.0407448146004759	0.00182769123967067	0.0371625397707214	0.0443270894302304
8	PreTest, EntryTest, ExitTest, PCR 1D	8	6.48320329372136	5.27387888963069	-3.85359932995479	16.8200059173975	1542.01536489211	316.995068770561	920.705030101807	2163.32569968241	1548.49856818583	317.456616640283	926.283599570874	2170.71353680078	0.0287801405229085	0.00154370341577423	0.025754481827991	0.031805799217826
8	PreTest, EntryTest, ExitTest, PCR 1D	9	2.2004574827326	2.98258315884977	-3.64540550861295	8.04632047407815	1035.38238251665	225.044296467665	594.295561440031	1476.46920359328	1037.58283999939	225.383800043162	595.83059191479	1479.33508808398	0.0202356353860766	0.00130291867541776	0.0176819147822578	0.0227893559898954
8	PreTest, EntryTest, ExitTest, PCR 1D	10	0.781958292799448	1.79742078937525	-2.74098645437604	4.30490303997494	696.069382773866	161.196148647814	380.12493142415	1012.01383412358	696.851341066666	161.192135283741	380.914755910534	1012.7879262228	0.0142789626497089	0.00107998160381808	0.0121621987062254	0.0163957265931923
8	PreTest, EntryTest, ExitTest, PCR 1D	11	0.320191491376568	1.17464438201609	-1.98211149737497	2.6224944801281	463.260658893434	120.432891906869	227.212190755972	699.309127030897	463.580850384811	120.46422146571	227.470976312019	699.690724457603	0.00998548016431396	0.000898325868967781	0.00822476146113711	0.0117461988674908
8	PreTest, EntryTest, ExitTest, PCR 1D	12	0.126043416602649	0.728413653382724	-1.30164734402749	1.55373417723279	307.446712485865	83.0669151277862	144.635558835404	470.257866136326	307.572755902468	83.0683231646331	144.758842499787	470.386669305149	0.00700536475404631	0.000770390047569854	0.0054954002608094	0.00851532924728322
8	PreTest, EntryTest, ExitTest, PCR 1D	13	0.046848001798059	0.464436335310886	-0.863447215411278	0.957143219007396	203.206701720239	59.7296314863117	86.1366240070683	320.27677943341	203.253549722037	59.751423314913	86.1407600248077	320.366339419267	0.00489954818791495	0.000632301216753303	0.00366023780307848	0.00613885857275143
8	PreTest, EntryTest, ExitTest, PCR 1D	14	0.021811359119499	0.295321480306456	-0.557018742281155	0.600641460520153	134.617808351803	43.5914190695502	49.1786269754843	220.056989728121	134.639619710922	43.6014638649213	49.1807505356764	220.098488886168	0.00344212528759503	0.000529362745443552	0.00240457430652567	0.00447967626866439
8	PreTest, EntryTest, ExitTest, PCR 1D	15	0.00743049731178677	0.168031855146931	-0.321911938776197	0.336772933399771	89.1824070732366	33.4407852946811	23.6384678956616	154.726346250812	89.1898375705483	33.4437635241488	23.6400610632166	154.73961407788	0.00242129229850835	0.000451906587102491	0.00153555538778746	0.00330702920922923
8	PreTest, EntryTest, ExitTest, PCR 1D	16	0.00422508095036339	0.094430564487773	-0.180858825445672	0.189308987346398	58.6794601158365	24.2121987248864	11.2235506150592	106.135369616614	58.6836851967869	24.207347840422	11.2372834295598	106.130086964014	0.00170246496538436	0.00037156403020303	0.000974199466186422	0.0024307304645823
8	PreTest, EntryTest, ExitTest, PCR 1D	17	0	0	0	0	38.4632544355767	18.0016749375341	3.17997155800981	73.7465373131436	38.4632544355767	18.0016749375341	3.17997155800981	73.7465373131436	0.00119736493089008	0.000310205154944863	0.000589362827198145	0.00180536703458201
8	PreTest, EntryTest, ExitTest, PCR 1D	18	0	0	0	0	25.7523969713688	13.7042365874827	-1.10790674009726	52.6127006828348	25.7523969713688	13.7042365874827	-1.10790674009726	52.6127006828348	0.000861748213907928	0.000267903867554882	0.000336656633500359	0.0013868397943155
8	PreTest, EntryTest, ExitTest, PCR 1D	19	0	0	0	0	16.7739389170405	10.0785012021842	-2.97992343924052	36.5278012733214	16.7739389170405	10.0785012021842	-2.97992343924052	36.5278012733214	0.000610811807677337	0.000221856310613432	0.00017597343887501	0.00104565017647966
8	PreTest, EntryTest, ExitTest, PCR 1D	20	0	0	0	0	11.2336139529711	7.78899914255349	-4.03282436643377	26.5000522723759	11.2336139529711	7.78899914255349	-4.03282436643377	26.5000522723759	0.000440756514764505	0.000188706117690477	7.08925240911692e-05	0.000810620505437841
8	PreTest, EntryTest, ExitTest, PCR 1D	21	0	0	0	0	7.34937373438663	6.08674306771324	-4.58064267833133	19.2793901471046	7.34937373438663	6.08674306771324	-4.58064267833133	19.2793901471046	0.000314796854647507	0.000163704222673741	-6.0634217930258e-06	0.00063565713108804
9	PreTest, EntryTest, ExitTest, PCR 2D	0	29769.9954157289	3484.93765135354	22939.517619076	36600.4732123819	36787.9711609301	7965.66808402419	21175.2617162427	52400.6806056175	66557.966576659	8728.31323337059	49450.4726392527	83665.4605140654	0.825292078462906	0.00348632382690093	0.81845888376218	0.832125273163632
9	PreTest, EntryTest, ExitTest, PCR 2D	1	20300.8040795103	2403.60470822531	15589.7388513887	25011.8693076319	27984.5455652824	5998.93925798422	16226.6246196333	39742.4665109315	48285.3496447928	6569.52611493073	35409.0784595285	61161.620830057	0.620952009633073	0.00452148665479008	0.612089895789685	0.629814123476462
9	PreTest, EntryTest, ExitTest, PCR 2D	2	11041.748730346	1344.71581830913	8406.10572646009	13677.3917342319	20169.1033457108	4049.36512649474	12232.3476977811	28105.8589936404	31210.8520760568	4450.01438901106	22488.8238735951	39932.8802785184	0.420429248254623	0.00472623718860651	0.411165823364955	0.429692673144292
9	PreTest, EntryTest, ExitTest, PCR 2D	3	3871.59416987362	491.803992336848	2907.6583448934	4835.52999485384	11405.3438261236	2120.97472987106	7248.23335557636	15562.4542966709	15276.9379959972	2304.67777218608	10759.7695625125	19794.106429482	0.217617109568088	0.00396891999123728	0.209838026385263	0.225396192750913
9	PreTest, EntryTest, ExitTest, PCR 2D	4	1176.25802252408	166.924160300107	849.086668335871	1503.42937671229	7310.38944824066	1294.74447429596	4772.69027862059	9848.08861786074	8486.64747076475	1368.91187492126	5803.58019591908	11169.7147456104	0.128373151038758	0.0031136767298952	0.122270344648163	0.134475957429352
9	PreTest, EntryTest, ExitTest, PCR 2D	5	331.085967082053	57.4376799174444	218.508114443862	443.663819720244	4906.77906629562	872.583448674328	3196.51550689394	6617.0426256973	5237.86503337768	897.846924283424	3478.08506178216	6997.64500497319	0.0838098355662997	0.00243050010587976	0.0790460553587754	0.088573615773824
9	PreTest, EntryTest, ExitTest, PCR 2D	6	93.1408865373	24.0300119563631	46.0420631028282	140.239709971772	3271.2184885602	599.764432037965	2095.68020176578	4446.75677535461	3364.3593750975	607.8203827772	2173.03142485418	4555.68732534081	0.0566299374441319	0.00213704865739832	0.0524413220756312	0.0608185528126325
9	PreTest, EntryTest, ExitTest, PCR 2D	7	27.9333906661099	11.4638023575047	5.46433804540072	50.402443286819	2229.69965796823	430.015857290893	1386.86857767808	3072.53073825838	2257.63304863434	432.392337265364	1410.14406759422	3105.12202967445	0.0399143656175021	0.00176651125747663	0.0364520035528478	0.0433767276821563
9	PreTest, EntryTest, ExitTest, PCR 2D	8	8.98251340503877	6.35355039290848	-3.47044536506185	21.4354721751394	1506.06690861397	307.68034267021	903.01343698036	2109.12038024758	1515.04942201901	308.747401397998	909.904515278934	2120.19432875909	0.0281062986722651	0.00154363200652919	0.0250807799394679	0.0311318174050623
9	PreTest, EntryTest, ExitTest, PCR 2D	9	2.9350753731704	3.60495772439441	-4.13064176664264	10.0007925129834	1011.9261206185	218.962569769279	582.759483870714	1441.09275736629	1014.86119599167	219.090367299585	585.444076084484	1444.27831589886	0.0197708244090166	0.00125586963839191	0.0173093199177685	0.0222323289002648
9	PreTest, EntryTest, ExitTest, PCR 2D	10	1.08736424910094	2.13265361423136	-3.09263683479252	5.26736533299441	678.520953480055	158.819589980667	367.234557117948	989.807349842162	679.608317729156	158.93706974912	368.09166102088	991.124974437432	0.0139154743377231	0.00109028292870012	0.0117785197974709	0.0160524288779754
9	PreTest, EntryTest, ExitTest, PCR 2D	11	0.382195080825831	1.23956325524335	-2.04734889945113	2.8117390611028	452.491989651453	116.494058793314	224.163634416559	680.820344886348	452.874184732279	116.495011869044	224.543961468952	681.204407995606	0.00976124493833848	0.000895816749193921	0.00800544410991839	0.0115170457667586
9	PreTest, EntryTest, ExitTest, PCR 2D	12	0.145449324206544	0.766849221217924	-1.35757514938059	1.64847379779368	301.695230817789	82.5489872475411	139.899215812609	463.49124582297	301.840680141996	82.5873400551918	139.96949363382	463.711866650172	0.00687288136489229	0.00076093953584726	0.00538143987463166	0.00836432285515291
9	PreTest, EntryTest, ExitTest, PCR 2D	13	0.057567940713241	0.459545352418513	-0.843140950027044	0.958276831453526	200.741233098033	60.4997169660981	82.1617878444805	319.320678351585	200.798801038746	60.5107117985213	82.1978059136442	319.399796163848	0.00483550894025543	0.000644343098441274	0.00357259646731054	0.00609842141320033
9	PreTest, EntryTest, ExitTest, PCR 2D	14	0.0192252932389969	0.253621685189408	-0.477873209732243	0.516323796210237	132.29493000608	43.7063260374844	46.6305309726106	217.959329039549	132.314155299319	43.6921535049107	46.6775344296938	217.950776168944	0.0033812139172382	0.000530966092130424	0.00234052037666257	0.00442190745781383
9	PreTest, EntryTest, ExitTest, PCR 2D	15	0.0104835249506367	0.1667545243005	-0.316355342678343	0.337322392579616	87.5509388377048	32.7686678761231	23.3243498005035	151.777527874906	87.5614223626554	32.7621707839299	23.3475676261529	151.775277099158	0.00237983099070906	0.000453610748010606	0.00149075392460827	0.00326890805680985
9	PreTest, EntryTest, ExitTest, PCR 2D	16	0.00242038895315086	0.076539419154673	-0.147596872590008	0.15243765049631	57.955532106993	24.541560334533	9.85407385130833	106.056990362678	57.9579524959461	24.5392810397718	9.86096165799336	106.054943333899	0.00168113149173608	0.000387533267375625	0.000921566287679859	0.00244069669579231
9	PreTest, EntryTest, ExitTest, PCR 2D	17	0.00317851679476911	0.100513526525684	-0.193827995195571	0.200185028785109	38.1879001599336	18.4744723135714	1.97793442533361	74.3978658945335	38.1910786767283	18.4748118073793	1.98044753426488	74.4017098191918	0.00118967176866955	0.000318599049740475	0.000565217631178222	0.00181412590616088
9	PreTest, EntryTest, ExitTest, PCR 2D	18	0	0	0	0	25.3360818756866	13.9066785629575	-1.92100810771018	52.5931718590833	25.3360818756866	13.9066785629575	-1.92100810771018	52.5931718590833	0.000847560213402426	0.000265550315027476	0.000327081595948573	0.00136803883085628
9	PreTest, EntryTest, ExitTest, PCR 2D	19	0.00276406439977157	0.0874073910266434	-0.16855442201245	0.174082550811993	16.7021330126859	10.398816440294	-3.67954721029031	37.0838132356621	16.7048970770856	10.3989226295565	-3.67699127684509	37.0867854310164	0.000603874870451635	0.000221147598872581	0.000170425576661375	0.00103732416424189
9	PreTest, EntryTest, ExitTest, PCR 2D	20	0	0	0	0	11.1150298872303	7.75798861434314	-4.09062779688228	26.3206875713428	11.1150298872303	7.75798861434314	-4.09062779688228	26.3206875713428	0.000436528557214491	0.000191661287277103	6.08724341513689e-05	0.000812184680277614
9	PreTest, EntryTest, ExitTest, PCR 2D	21	0	0	0	0	7.32897033063248	6.00495426174464	-4.44074002238701	19.098680683652	7.32897033063248	6.00495426174464	-4.44074002238701	19.098680683652	0.000314299687161972	0.000165017099581405	-9.13382801758265e-06	0.000637733202341526
10	PreTest, EntryTest, ExitTest, DailyTest, PCR 0D	0	24304.1593789663	2853.07116128856	18712.1399028407	29896.1788550919	33688.8021679097	7010.38299303003	19948.4515015709	47429.1528342486	57992.961546876	7678.6441684127	42942.8189767871	73043.1041169649	0.724130553589301	0.00411414034876668	0.716066838505718	0.732194268672884
10	PreTest, EntryTest, ExitTest, DailyTest, PCR 0D	1	9331.13243539918	1113.5476830837	7148.57897655513	11513.6858942432	17031.683495536	3376.39769651212	10413.9440103722	23649.4229806997	26362.8159309352	3674.59769169627	19160.6044552105	33565.0274066598	0.344608878374431	0.00450422633225448	0.335780594763212	0.35343716198565
10	PreTest, EntryTest, ExitTest, DailyTest, PCR 0D	2	2547.81997453678	325.361356102744	1910.1117165754	3185.52823249815	9232.26922730499	1639.23217031525	6019.3741734871	12445.1642811229	11780.0892018418	1744.84282977036	8360.19725549185	15199.9811481917	0.163640318928052	0.00352308371911369	0.15673507483859	0.170545563017515
10	PreTest, EntryTest, ExitTest, DailyTest, PCR 0D	3	536.399686516887	84.133284634266	371.498448633725	701.300924400048	5093.71786607949	864.734848352503	3398.83756330858	6788.59816885039	5630.11755259637	894.762751486954	3876.38255968194	7383.8525455108	0.0832087826116445	0.00258101209200511	0.0781499989113144	0.0882675663119745
10	PreTest, EntryTest, ExitTest, DailyTest, PCR 0D	4	109.092448795981	26.4874776843666	57.176992534623	161.00790505734	2716.69517317012	468.799399729458	1797.84834970038	3635.54199663985	2825.7876219661	475.086118617657	1894.61882947549	3756.95641445671	0.0439787356717001	0.00191463175404304	0.0402260574337758	0.0477314139096245
10	PreTest, EntryTest, ExitTest, DailyTest, PCR 0D	5	22.3542315998445	10.768752530542	1.24747663998214	43.4609865597069	1486.89616772943	271.253419460624	955.239465586609	2018.55286987225	1509.25039932928	273.419199002537	973.348769284304	2045.15202937425	0.0246637518711627	0.00143279264780299	0.0218554782814689	0.0274720254608566
10	PreTest, EntryTest, ExitTest, DailyTest, PCR 0D	6	4.63765183374025	4.69449412573395	-4.56355665269828	13.8388603201788	753.688427232328	150.312845435334	459.075250179073	1048.30160428558	758.326079066068	150.939157598669	462.485330172676	1054.16682795946	0.0129688040188868	0.00106191854831732	0.0108874436641849	0.0150501643735888
10	PreTest, EntryTest, ExitTest, DailyTest, PCR 0D	7	0.952608703597712	2.00128376806152	-2.96990748180287	4.87512488899829	387.343636805186	86.6716419623697	217.467218558942	557.220055051431	388.296245508784	86.817245109199	218.134445094754	558.458045922814	0.00695845056774041	0.000782620253989856	0.00542451486992029	0.00849238626556052
10	PreTest, EntryTest, ExitTest, DailyTest, PCR 0D	8	0.211974864488903	0.97916679358736	-1.70719205094232	2.13114177992013	187.513107075575	47.2662208249897	94.8713142585956	280.154899892555	187.725081940064	47.3265512496845	94.9650414906826	280.485122389446	0.00353193815337175	0.000559625372967831	0.0024350724223548	0.0046288038843887
10	PreTest, EntryTest, ExitTest, DailyTest, PCR 0D	9	0.025214082013047	0.329848029470083	-0.621288055748315	0.671716219774409	91.4174496846024	27.2878400199456	37.933283245509	144.901616123696	91.4426637666154	27.3094135717632	37.9162131659595	144.969114367271	0.00180748972315105	0.000395862148639167	0.00103159991181829	0.00258337953448382
10	PreTest, EntryTest, ExitTest, DailyTest, PCR 0D	10	0.0091386947677816	0.210396666596346	-0.403238771761057	0.421516161296621	43.0151452339734	16.3189589891008	11.0299856153358	75.0003048526109	43.0242839287412	16.3306030487386	11.0163019532135	75.0322659042688	0.000896233545579079	0.00027946327142681	0.000348485533582532	0.00144398155757563
10	PreTest, EntryTest, ExitTest, DailyTest, PCR 0D	11	0.00344060133843625	0.108801367500824	-0.209810078963179	0.216691281640051	20.3982397101188	10.258478928048	0.291621011144681	40.504858409093	20.4016803114573	10.2628879222453	0.286419983856433	40.5169406390581	0.000446567751601472	0.000192008777043497	7.02305485962177e-05	0.000822904954606725
10	PreTest, EntryTest, ExitTest, DailyTest, PCR 0D	12	0	0	0	0	9.74958376748374	6.50722899629183	-3.00458506524824	22.5037526002157	9.74958376748374	6.50722899629183	-3.00458506524824	22.5037526002157	0.000227168302631921	0.000140898561957234	-4.89928788042572e-05	0.0005033294840681
10	PreTest, EntryTest, ExitTest, DailyTest, PCR 0D	13	0	0	0	0	4.32316889733842	4.02198728920974	-3.55992618951267	12.2062639841895	4.32316889733842	4.02198728920974	-3.55992618951267	12.2062639841895	0.000107272886999232	9.34457154408237e-05	-7.58807152647826e-05	0.000290426489263246
10	PreTest, EntryTest, ExitTest, DailyTest, PCR 0D	14	0	0	0	0	1.93615071983673	2.48110725595576	-2.92681950183657	6.79912094151002	1.93615071983673	2.48110725595576	-2.92681950183657	6.79912094151002	5.11048079978319e-05	6.24427790152204e-05	-7.1283038872e-05	0.000173492654867664
10	PreTest, EntryTest, ExitTest, DailyTest, PCR 0D	15	0	0	0	0	0.873265544217472	1.69564718301402	-2.45020293449	4.19673402292495	0.873265544217472	1.69564718301402	-2.45020293449	4.19673402292495	2.48654213894156e-05	4.49150140545921e-05	-6.31680061575849e-05	0.000112898848936416
10	PreTest, EntryTest, ExitTest, DailyTest, PCR 0D	16	0	0	0	0	0.388511914761707	1.13585754874286	-1.83776888077429	2.61479271029771	0.388511914761707	1.13585754874286	-1.83776888077429	2.61479271029771	1.17760998633663e-05	3.18747059602281e-05	-5.06983238186808e-05	7.42505235454133e-05
10	PreTest, EntryTest, ExitTest, DailyTest, PCR 0D	17	0	0	0	0	0.161803442650113	0.696564969389636	-1.20346389735357	1.5270707826538	0.161803442650113	0.696564969389636	-1.20346389735357	1.5270707826538	5.36091591490143e-06	2.1897777710283e-05	-3.75587283972532e-05	4.82805602270561e-05
10	PreTest, EntryTest, ExitTest, DailyTest, PCR 0D	18	0	0	0	0	0.0487492720244769	0.348894533666517	-0.635084013961897	0.732582558010851	0.0487492720244769	0.348894533666517	-0.635084013961897	0.732582558010851	1.99589087541329e-06	1.35954892035154e-05	-2.46512679634769e-05	2.86430497143034e-05
10	PreTest, EntryTest, ExitTest, DailyTest, PCR 0D	19	0	0	0	0	0.0190527611336347	0.185833040658396	-0.345179998556822	0.383285520824091	0.0190527611336347	0.185833040658396	-0.345179998556822	0.383285520824091	9.5827290691092e-07	9.09165595064778e-06	-1.68613727563587e-05	1.87779185701806e-05
10	PreTest, EntryTest, ExitTest, DailyTest, PCR 0D	20	0	0	0	0	0.00372826390900517	0.0697765488218232	-0.133033771781768	0.140490299599779	0.00372826390900517	0.0697765488218232	-0.133033771781768	0.140490299599779	2.59503658830588e-07	4.73348881018796e-06	-9.01813440913782e-06	9.53714172679899e-06
10	PreTest, EntryTest, ExitTest, DailyTest, PCR 0D	21	0	0	0	0	0.00125231139533687	0.0396015634904807	-0.0763667530460053	0.078871375836679	0.00125231139533687	0.0396015634904807	-0.0763667530460053	0.078871375836679	8.71763577717723e-08	2.75675848676522e-06	-5.31607027628805e-06	5.4904229918316e-06
11	PreTest, EntryTest, ExitTest, DailyTest, Antigen	0	30289.4470439882	3549.88567068854	23331.6711294387	37247.2229585378	40239.5902678663	8484.67697768167	23609.6233916102	56869.5571441224	70529.0373118545	9299.23316497258	52302.5403085083	88755.5343152008	0.877967150352546	0.00300469749526968	0.872077943261817	0.883856357443274
11	PreTest, EntryTest, ExitTest, DailyTest, Antigen	1	18116.4038694814	2141.2269483243	13919.5990507658	22313.208688197	28884.037404614	5907.94324502461	17304.4686443658	40463.6061648622	47000.4412740954	6450.34075622493	34357.7733918945	59643.1091562962	0.609151600249469	0.00454088406648429	0.600251467479159	0.618051733019778
11	PreTest, EntryTest, ExitTest, DailyTest, Antigen	2	8468.45458603738	1034.16302674416	6441.49505361884	10495.4141184559	20052.4973349834	3783.4630860442	12636.9096863367	27468.08498363	28520.9519210208	4110.41160577551	20464.5451737008	36577.3586683408	0.388979663089026	0.00468452311527537	0.379797997783087	0.398161328394966
11	PreTest, EntryTest, ExitTest, DailyTest, Antigen	3	3094.88313552724	395.889502143892	2318.93971132521	3870.82655972926	13750.6105966266	2422.67326356639	9002.17100003652	18499.0501932168	16845.4937321539	2577.95466652845	11792.7025857581	21898.2848785496	0.243787340099414	0.00415284072003145	0.235647772288152	0.251926907910675
11	PreTest, EntryTest, ExitTest, DailyTest, Antigen	4	993.676772287211	143.841848651625	711.746748930026	1275.6067956444	9245.659559642	1595.87003255887	6117.75429582661	12373.5648234574	10239.3363319292	1658.26690997636	6989.13318837556	13489.5394754829	0.156563273556085	0.00340239468117188	0.149894579980989	0.163231967131182
11	PreTest, EntryTest, ExitTest, DailyTest, Antigen	5	302.837985387072	54.8348109542406	195.36175591676	410.314214857383	6328.33694107507	1112.94541196809	4146.96393361762	8509.70994853252	6631.17492646214	1135.54817058738	4405.50051211087	8856.84934081341	0.106705619458403	0.0028127832269107	0.101192564333658	0.112218674583148
11	PreTest, EntryTest, ExitTest, DailyTest, Antigen	6	90.3753883805519	23.2622037779758	44.7814689757194	135.969307785384	4182.26130077581	766.802130348979	2679.32912529181	5685.19347625981	4272.63668915636	774.848978816188	2753.93269067663	5791.34068763609	0.0720355865293328	0.00233267606719104	0.0674635414376384	0.0766076316210272
11	PreTest, EntryTest, ExitTest, DailyTest, Antigen	7	28.2409039477966	12.0433864189768	4.63586656660196	51.8459413289912	2767.84001155399	530.596116954958	1727.87162232228	3807.80840078571	2796.08091550179	533.786869594302	1749.85865109696	3842.30317990662	0.0493865113862285	0.00194763864015229	0.04556913965153	0.053203883120927
11	PreTest, EntryTest, ExitTest, DailyTest, Antigen	8	9.10974458890341	6.24307428861317	-3.12668101677841	21.3461701945852	1793.58321808617	363.838551786307	1080.45965658501	2506.70677958733	1802.69296267507	364.650563299424	1087.9778586082	2517.40806674194	0.0333601203940588	0.00166246122425913	0.0301016963945109	0.0366185443936067
11	PreTest, EntryTest, ExitTest, DailyTest, Antigen	9	2.86315543950436	3.42067372944475	-3.84136507020735	9.56767594921607	1151.1303493903	248.366708988807	664.331599772242	1637.92909900836	1153.99350482981	248.596541048956	666.744284373854	1641.24272528576	0.0224029882310957	0.00132817631487401	0.0197997626539427	0.0250062138082488
11	PreTest, EntryTest, ExitTest, DailyTest, Antigen	10	1.01373452848019	2.04641682018871	-2.99724243908969	5.02471149605006	735.705306120581	169.366611507154	403.746747566558	1067.6638646746	736.719040649061	169.443436607162	404.609904899024	1068.8281763991	0.0150295551942856	0.00109911351237239	0.0128752927100357	0.0171838176785355
11	PreTest, EntryTest, ExitTest, DailyTest, Antigen	11	0.377391898790844	1.23512133077543	-2.04344590952899	2.79822970711068	467.979439677868	118.853133733209	235.027297560778	700.931581794957	468.356831576659	118.91914058522	235.275316029627	701.43834712369	0.0100541532028848	0.000906193988938849	0.00827801298456463	0.0118302934212049
11	PreTest, EntryTest, ExitTest, DailyTest, Antigen	12	0.159539646817526	0.798564408476475	-1.40564659379636	1.72472588743142	295.995421854385	80.2383784934625	138.728200007199	453.262643701572	296.154961501203	80.2590801499721	138.847164407257	453.462758595148	0.00671722886666816	0.000740465547039043	0.00526591639447163	0.00816854133886468
11	PreTest, EntryTest, ExitTest, DailyTest, Antigen	13	0.0724796383186781	0.529417855636523	-0.965179358728907	1.11013863536626	186.820261658334	56.1928650272821	76.6822462048611	296.958277111807	186.892741296653	56.216948498323	76.7075222399396	297.077960353366	0.00448330908649947	0.000607200310929348	0.00329319647707795	0.00567342169592099
11	PreTest, EntryTest, ExitTest, DailyTest, Antigen	14	0.0293893258085697	0.33700355520405	-0.631137642391368	0.689916294008507	117.50136827577	39.6401533902209	39.806667630937	195.196068920603	117.530757601579	39.6540968491671	39.8087277772111	195.252787425946	0.00298967231461444	0.000501684571185962	0.00200637055508995	0.00397297407413892
11	PreTest, EntryTest, ExitTest, DailyTest, Antigen	15	0.00744843440180315	0.13601167352255	-0.259134445702394	0.274031314506	73.7332134328881	28.6986501527316	17.4838591335343	129.982567732242	73.7406618672899	28.6932371629705	17.5019170278677	129.979406706712	0.00199685875332825	0.000417285056309991	0.00117898004296067	0.00281473746369583
11	PreTest, EntryTest, ExitTest, DailyTest, Antigen	16	0.00454726763682031	0.101841001400161	-0.195061095107495	0.204155630381135	46.282940385119	20.4482574511275	6.20435578090908	86.3615249893289	46.2874876527558	20.4442885488104	6.21668209708739	86.3582932084242	0.00134072512501927	0.000343088075448885	0.000668272497139451	0.00201317775289908
11	PreTest, EntryTest, ExitTest, DailyTest, Antigen	17	0	0	0	0	28.9233383045017	14.9472152539422	-0.373203593225	58.2198802022285	28.9233383045017	14.9472152539422	-0.373203593225	58.2198802022285	0.000896794155227224	0.000277445538757929	0.000353000899261683	0.00144058741119276
11	PreTest, EntryTest, ExitTest, DailyTest, Antigen	18	0	0	0	0	18.3274370613714	10.6319878658488	-2.51125915569228	39.1661332784351	18.3274370613714	10.6319878658488	-2.51125915569228	39.1661332784351	0.000611686264067435	0.000225927907684529	0.000168867565005758	0.00105450496312911
11	PreTest, EntryTest, ExitTest, DailyTest, Antigen	19	0	0	0	0	11.5466208675379	7.7989380840713	-3.73929777724181	26.8325395123177	11.5466208675379	7.7989380840713	-3.73929777724181	26.8325395123177	0.00041688785893696	0.000186224045681517	5.18887294011873e-05	0.000781886988472733
11	PreTest, EntryTest, ExitTest, DailyTest, Antigen	20	0	0	0	0	7.20520638576819	5.62061827050308	-3.81120542441786	18.2216181959542	7.20520638576819	5.62061827050308	-3.81120542441786	18.2216181959542	0.000285350219529769	0.000156530574424933	-2.14497063430987e-05	0.000592150145402637
11	PreTest, EntryTest, ExitTest, DailyTest, Antigen	21	0	0	0	0	4.44033442727356	4.09744393204728	-3.59065567953911	12.4713245340862	4.44033442727356	4.09744393204728	-3.59065567953911	12.4713245340862	0.000192750929506356	0.000130250714231443	-6.25404703872725e-05	0.000448042329399984
12	PreTest, EntryTest, ExitTest, DailyTest, PCR 1D	0	27806.5804837657	3257.69072470354	21421.5066633468	34191.6543041846	35319.4708954034	7569.7058104928	20482.8475068375	50156.0942839693	63126.0513791691	8298.5258977329	46860.9406196126	79391.1621387256	0.783906154312719	0.00376847825541488	0.776519936932106	0.791292371693332
12	PreTest, EntryTest, ExitTest, DailyTest, PCR 1D	1	19249.2702612943	2276.90108255192	14786.5441394925	23711.996383096	26861.1817484733	5736.12619906953	15618.374398297	38103.9890986496	46110.4520097676	6281.73210419749	33798.2570855405	58422.6469339947	0.593344329696074	0.00461018876513331	0.584308359716413	0.602380299675736
12	PreTest, EntryTest, ExitTest, DailyTest, PCR 1D	2	6244.50348515671	766.98836954507	4741.20628084838	7747.80068946505	12692.6180447924	2494.55253516873	7803.29507586165	17581.9410137231	18937.1215299491	2730.99619932504	13584.368979272	24289.8740806262	0.256187870595139	0.00416044368093342	0.248033400980509	0.264342340209768
12	PreTest, EntryTest, ExitTest, DailyTest, PCR 1D	3	1522.21212025085	205.901436426904	1118.64530485411	1925.77893564758	6631.99798397301	1186.43288153689	4306.58953616071	8957.40643178532	8154.21010422386	1264.84248801403	5675.11882771635	10633.3013807314	0.117683783571461	0.00312535940892937	0.11155807912996	0.123809488012963
12	PreTest, EntryTest, ExitTest, DailyTest, PCR 1D	4	299.013040296232	52.7962063843051	195.532475782994	402.49360480947	3368.68601967252	600.704682224269	2191.30484251295	4546.06719683209	3667.69905996875	620.158629830368	2452.18814550123	4883.20997443627	0.0561250389966523	0.00208625189548224	0.0520359852815071	0.0602140927117974
12	PreTest, EntryTest, ExitTest, DailyTest, PCR 1D	5	58.3913558792341	18.1956601108707	22.7278620619274	94.0548496965407	1768.03888203909	323.391892119862	1134.19077348416	2401.88699059402	1826.43023791833	328.304867642734	1182.95269733857	2469.90777849809	0.029489887677297	0.00156623037766918	0.0264200761370654	0.0325596992175286
12	PreTest, EntryTest, ExitTest, DailyTest, PCR 1D	6	11.6495106953086	7.14190787361156	-2.34862873697004	25.6476501275873	881.439250247547	177.469128685184	533.599758024587	1229.27874247051	893.088760942855	178.44569996221	543.335189016923	1242.84233286879	0.0151171956888567	0.00109574758381263	0.012969530424584	0.0172648609531295
12	PreTest, EntryTest, ExitTest, DailyTest, PCR 1D	7	2.46923976613848	3.21373237222644	-3.82967568342535	8.7681552157023	446.876517313183	98.2601482643023	254.28662671515	639.466407911215	449.345757079321	98.2786311020121	256.719640119377	641.971874039265	0.00799212092247608	0.000840381955512197	0.00634497228967218	0.00963926955527999
12	PreTest, EntryTest, ExitTest, DailyTest, PCR 1D	8	0.529816332756334	1.48446758928432	-2.37974014224094	3.43937280775361	216.210393080086	54.0681568112375	110.23680573006	322.183980430111	216.740209412842	54.0764154357044	110.750435158862	322.729983666823	0.00404415031615714	0.000596281201077048	0.00287543916204613	0.00521286147026816
12	PreTest, EntryTest, ExitTest, DailyTest, PCR 1D	9	0.185760200846588	0.869882354884813	-1.51920921472764	1.89072961642082	104.279748661886	33.6182358383266	38.3880064187654	170.171490905006	104.465508862732	33.6810375869205	38.4506751923679	170.480342533096	0.00204210625828879	0.000444243763578511	0.00117138848167491	0.00291282403490268
12	PreTest, EntryTest, ExitTest, DailyTest, PCR 1D	10	0.033066108027045	0.35074469538331	-0.654393494924242	0.720525710978332	49.7010430568239	18.9412776471169	12.5761388684748	86.8259472451729	49.7341091648509	18.9218796304787	12.6472250891126	86.8209932405892	0.00102288105766365	0.000295648291013592	0.000443410407277011	0.00160235170805029
12	PreTest, EntryTest, ExitTest, DailyTest, PCR 1D	11	0.0103024843363418	0.189938440119927	-0.361976858298716	0.382581826971399	23.4197527046588	11.8260142272447	0.240764819259134	46.5987405900584	23.4300551889951	11.8185552253604	0.265686947288792	46.5944234307014	0.000506335755908898	0.000211514690793129	9.17669619543647e-05	0.000920904549863431
12	PreTest, EntryTest, ExitTest, DailyTest, PCR 1D	12	0	0	0	0	10.8033209488461	6.93762773646407	-2.79442941462352	24.4010713123156	10.8033209488461	6.93762773646407	-2.79442941462352	24.4010713123156	0.000248145522960029	0.000144434108518298	-3.49453297358355e-05	0.000531236375655894
12	PreTest, EntryTest, ExitTest, DailyTest, PCR 1D	13	0	0	0	0	5.06222839029002	4.44880186959838	-3.65742327412281	13.7818800547028	5.06222839029002	4.44880186959838	-3.65742327412281	13.7818800547028	0.000124191435758271	0.000103912256071672	-7.94765861422054e-05	0.000327859457658747
12	PreTest, EntryTest, ExitTest, DailyTest, PCR 1D	14	0	0	0	0	2.33609877919625	2.89583994664313	-3.33974751622428	8.01194507461677	2.33609877919625	2.89583994664313	-3.33974751622428	8.01194507461677	6.04338467280729e-05	7.04566458048021e-05	-7.76611790493392e-05	0.000198528872505485
12	PreTest, EntryTest, ExitTest, DailyTest, PCR 1D	15	0	0	0	0	1.11737733930315	1.96581805628585	-2.73562605101712	4.97038072962343	1.11737733930315	1.96581805628585	-2.73562605101712	4.97038072962343	3.09475487490779e-05	5.21104062053083e-05	-7.11888474133263e-05	0.000133083944911482
12	PreTest, EntryTest, ExitTest, DailyTest, PCR 1D	16	0	0	0	0	0.519304935664278	1.39433330734181	-2.21358834672566	3.25219821805422	0.519304935664278	1.39433330734181	-2.21358834672566	3.25219821805422	1.51639637245654e-05	3.76073365415828e-05	-5.85464158969369e-05	8.88743433460677e-05
12	PreTest, EntryTest, ExitTest, DailyTest, PCR 1D	17	0	0	0	0	0.238554661783147	0.853187549536172	-1.43369293530775	1.91080225887404	0.238554661783147	0.853187549536172	-1.43369293530775	1.91080225887404	7.54312806760366e-06	2.59467916791007e-05	-4.33125836234337e-05	5.8398839758641e-05
12	PreTest, EntryTest, ExitTest, DailyTest, PCR 1D	18	0	0	0	0	0.0901655222936928	0.512247000631905	-0.913838598944841	1.09416964353223	0.0901655222936928	0.512247000631905	-0.913838598944841	1.09416964353223	3.38641840787104e-06	1.8525414504154e-05	-3.29233940202708e-05	3.96962308360129e-05
12	PreTest, EntryTest, ExitTest, DailyTest, PCR 1D	19	0	0	0	0	0.0514992746244822	0.38008708141803	-0.693471404954857	0.796469954203821	0.0514992746244822	0.38008708141803	-0.693471404954857	0.796469954203821	1.9955134951563e-06	1.41260294711873e-05	-2.56915042683708e-05	2.96825312586834e-05
12	PreTest, EntryTest, ExitTest, DailyTest, PCR 1D	20	0	0	0	0	0.0231387785310886	0.245646558873115	-0.458328476860218	0.504606033922395	0.0231387785310886	0.245646558873115	-0.458328476860218	0.504606033922395	9.52427027217252e-07	9.03576197227117e-06	-1.67576664384342e-05	1.86625204928687e-05
12	PreTest, EntryTest, ExitTest, DailyTest, PCR 1D	21	0	0	0	0	0.0152725147127698	0.200107917751202	-0.376939004079586	0.407484033505126	0.0152725147127698	0.200107917751202	-0.376939004079586	0.407484033505126	6.94729728184721e-07	7.7401320471198e-06	-1.44759290841701e-05	1.58653885405395e-05
13	PreTest, EntryTest, ExitTest, DailyTest, PCR 2D	0	29769.9954157289	3484.93765135354	22939.517619076	36600.4732123819	36787.9711609301	7965.66808402419	21175.2617162427	52400.6806056175	66557.966576659	8728.31323337059	49450.4726392527	83665.4605140654	0.825292078462906	0.00348632382690093	0.81845888376218	0.832125273163632
13	PreTest, EntryTest, ExitTest, DailyTest, PCR 2D	1	20300.8040795103	2403.60470822531	15589.7388513887	25011.8693076319	27984.5455652824	5998.93925798422	16226.6246196333	39742.4665109315	48285.3496447928	6569.52611493073	35409.0784595285	61161.620830057	0.620952009633073	0.00452148665479008	0.612089895789685	0.629814123476462
13	PreTest, EntryTest, ExitTest, DailyTest, PCR 2D	2	11041.748730346	1344.71581830913	8406.10572646009	13677.3917342319	20169.1033457108	4049.36512649474	12232.3476977811	28105.8589936404	31210.8520760568	4450.01438901106	22488.8238735951	39932.8802785184	0.420429248254623	0.00472623718860651	0.411165823364955	0.429692673144292
13	PreTest, EntryTest, ExitTest, DailyTest, PCR 2D	3	3236.70575601916	414.732251716261	2423.83054265529	4049.58096938304	9381.70470873587	1745.64222034656	5960.24595685661	12803.1634606151	12618.410464755	1900.63034246644	8893.1749935208	16343.6459359893	0.179504941665116	0.00366517859725998	0.172321191614487	0.186688691715746
13	PreTest, EntryTest, ExitTest, DailyTest, PCR 2D	4	747.830034687542	113.683102490501	525.01115380616	970.648915568923	4680.46486363059	830.261790816276	3053.15175363069	6307.7779736305	5428.29489831814	879.61357708394	3704.25228723361	7152.33750940266	0.0819154974815525	0.00250130385610334	0.07701294192359	0.0868180530395151
13	PreTest, EntryTest, ExitTest, DailyTest, PCR 2D	5	150.401146174583	33.2976210224332	85.1378089706138	215.664483378552	2356.45400328217	423.359180156919	1526.67001017461	3186.23799638973	2506.85514945676	435.768301267316	1652.74927897282	3360.9610199407	0.0399768149387098	0.00171493914611257	0.0366155342123292	0.0433380956650905
13	PreTest, EntryTest, ExitTest, DailyTest, PCR 2D	6	29.5205908264763	11.8088169076356	6.37530968751056	52.665871965442	1133.13002944594	213.952241956171	713.783635211841	1552.47642368003	1162.65062027241	216.859199836501	737.606588592871	1587.69465195195	0.0194818821205714	0.00128088144173189	0.0169713544947769	0.0219924097463659
13	PreTest, EntryTest, ExitTest, DailyTest, PCR 2D	7	6.10053499347181	5.17771068252378	-4.04777794427479	16.2488479312184	556.997749359217	116.750647534449	328.166480191697	785.829018526737	563.098284352689	117.554178298063	332.692094888485	793.504473816893	0.00991381747803873	0.000897918934771627	0.00815389636588634	0.0116737385901911
13	PreTest, EntryTest, ExitTest, DailyTest, PCR 2D	8	1.26786213771009	2.35483694255727	-3.34761826970215	5.88334254512233	264.208766130094	63.6186366455944	139.516238304729	388.901293955459	265.476628267804	63.7881676076219	140.451819756865	390.501436778743	0.00490919433506032	0.000665949508104888	0.00360393329917474	0.0062144553709459
13	PreTest, EntryTest, ExitTest, DailyTest, PCR 2D	9	0.265665474993174	1.05640296443911	-1.80488433530747	2.33621528529382	124.75727533508	34.5869389141006	56.966875063443	192.547675606717	125.022940810073	34.607231535777	57.1927669999504	192.853114620196	0.00243363557872328	0.000447114045151046	0.00155729205022723	0.00330997910721933
13	PreTest, EntryTest, ExitTest, DailyTest, PCR 2D	10	0.0633563531241683	0.554432831415093	-1.02333199644941	1.15004470269775	58.707261704853	20.7847282300955	17.9691943738657	99.4453290358402	58.7706180579771	20.8081379999881	17.9866675780005	99.5545685379537	0.00120262800939397	0.000324502892098464	0.000566602340880981	0.00183865367790696
13	PreTest, EntryTest, ExitTest, DailyTest, PCR 2D	11	0.0289440695799093	0.346952398871431	-0.651082632208095	0.708970771367913	27.4706214185496	13.0587708178309	1.87543061560108	53.0658122214982	27.4995654881296	13.0595923143877	1.90276455192969	53.0963664243294	0.000592934318852294	0.000231033318421507	0.000140109014746141	0.00104575962295845
13	PreTest, EntryTest, ExitTest, DailyTest, PCR 2D	12	0.0118659443892846	0.218118108577385	-0.415645548422389	0.439377437200958	12.9053937283397	7.76160655478604	-2.30735511904094	28.1181425757204	12.917259672729	7.77075482130883	-2.31341977703631	28.1479391224943	0.000295370601606126	0.000160944776770772	-2.00811608645877e-05	0.000610822364076839
13	PreTest, EntryTest, ExitTest, DailyTest, PCR 2D	13	0	0	0	0	5.9065823747732	5.1696122221502	-4.2258575806412	16.0390223301876	5.9065823747732	5.1696122221502	-4.2258575806412	16.0390223301876	0.000141729395287757	0.000112769250140268	-7.92983349871674e-05	0.000362757125562682
13	PreTest, EntryTest, ExitTest, DailyTest, PCR 2D	14	0	0	0	0	2.6692370422291	3.10795162088847	-3.42234813471231	8.76082221917051	2.6692370422291	3.10795162088847	-3.42234813471231	8.76082221917051	6.93969482058544e-05	7.76035510410283e-05	-8.27060118345611e-05	0.00022149990824627
13	PreTest, EntryTest, ExitTest, DailyTest, PCR 2D	15	0	0	0	0	1.21420452328069	2.09673258328847	-2.89539133996471	5.3238003865261	1.21420452328069	2.09673258328847	-2.89539133996471	5.3238003865261	3.3089518891796e-05	5.44143324467619e-05	-7.35625727038574e-05	0.000139741610487449
13	PreTest, EntryTest, ExitTest, DailyTest, PCR 2D	16	0	0	0	0	0.563855427077324	1.4049394378294	-2.1898258710683	3.31753672522295	0.563855427077324	1.4049394378294	-2.1898258710683	3.31753672522295	1.64483910299786e-05	3.77528968114058e-05	-5.75472867203768e-05	9.0444068780334e-05
13	PreTest, EntryTest, ExitTest, DailyTest, PCR 2D	17	0	0	0	0	0.228098286422515	0.840340762375507	-1.41896960783348	1.87516618067851	0.228098286422515	0.840340762375507	-1.41896960783348	1.87516618067851	7.10279022722438e-06	2.44101778292151e-05	-4.07411583180371e-05	5.49467387724859e-05
13	PreTest, EntryTest, ExitTest, DailyTest, PCR 2D	18	0	0	0	0	0.103289113642741	0.546654977411169	-0.96815464208315	1.17473286936863	0.103289113642741	0.546654977411169	-0.96815464208315	1.17473286936863	3.63199615825044e-06	1.77781989143347e-05	-3.12132737138457e-05	3.84772660303465e-05
13	PreTest, EntryTest, ExitTest, DailyTest, PCR 2D	19	0	0	0	0	0.041937438401302	0.304480530115031	-0.554844400624159	0.638719277426763	0.041937438401302	0.304480530115031	-0.554844400624159	0.638719277426763	1.90271028837024e-06	1.32649112462756e-05	-2.40965157543298e-05	2.79019363310703e-05
13	PreTest, EntryTest, ExitTest, DailyTest, PCR 2D	20	0	0	0	0	0.0191467072132348	0.213749736628531	-0.399802776578686	0.438096191005156	0.0191467072132348	0.213749736628531	-0.399802776578686	0.438096191005156	8.65870345081335e-07	8.61984817099671e-06	-1.60290320700722e-05	1.77607727602349e-05
13	PreTest, EntryTest, ExitTest, DailyTest, PCR 2D	21	0	0	0	0	0.00918731198054519	0.145743925763187	-0.276470782515302	0.294845406476392	0.00918731198054519	0.145743925763187	-0.276470782515302	0.294845406476392	4.31663691570981e-07	6.09254738745974e-06	-1.15097291878501e-05	1.23730565709921e-05
14	PreTest, EntryTest, ExitTest, TestEvery2Days, PCR 0D	0	24304.1593789663	2853.07116128856	18712.1399028407	29896.1788550919	33688.8021679097	7010.38299303003	19948.4515015709	47429.1528342486	57992.961546876	7678.6441684127	42942.8189767871	73043.1041169649	0.724130553589301	0.00411414034876668	0.716066838505718	0.732194268672884
14	PreTest, EntryTest, ExitTest, TestEvery2Days, PCR 0D	1	9331.13243539918	1113.5476830837	7148.57897655513	11513.6858942432	17031.683495536	3376.39769651212	10413.9440103722	23649.4229806997	26362.8159309352	3674.59769169627	19160.6044552105	33565.0274066598	0.344608878374431	0.00450422633225448	0.335780594763212	0.35343716198565
14	PreTest, EntryTest, ExitTest, TestEvery2Days, PCR 0D	2	4061.14840301114	505.037593441559	3071.27471986568	5051.02208615659	11508.6319506179	2119.84884286161	7353.72821860915	15663.5356826267	15569.780353629	2282.72303109032	11095.643212692	20043.9174945661	0.214010294359992	0.00394272352586301	0.2062825562493	0.221738032470683
14	PreTest, EntryTest, ExitTest, TestEvery2Days, PCR 0D	3	716.657274595441	106.594745042135	507.731574312855	925.582974878026	6329.71788433977	1081.76629650085	4209.45594319811	8449.97982548144	7046.37515893522	1123.07255024305	4845.15296045885	9247.59735741159	0.104005654610347	0.00287983413000858	0.0983611797155306	0.109650129505164
14	PreTest, EntryTest, ExitTest, TestEvery2Days, PCR 0D	4	267.362416550749	49.1962403753706	170.937785415023	363.787047686476	4247.13733509893	737.540697640744	2801.55756772308	5692.71710247479	4514.49975164968	755.896143346179	3032.94331069117	5996.05619260819	0.0697213483057372	0.00237188970735658	0.0650724444793184	0.0743702521321561
14	PreTest, EntryTest, ExitTest, TestEvery2Days, PCR 0D	5	44.1883138752104	15.7995945257312	13.2211086047773	75.1555191456436	2409.94214037273	436.012410974122	1555.35781486345	3264.52646588201	2454.13045424794	440.053821445354	1591.62496421504	3316.63594428083	0.040024438239199	0.00178656299880375	0.0365227747615436	0.0435261017168543
14	PreTest, EntryTest, ExitTest, TestEvery2Days, PCR 0D	6	16.0210384192765	8.50825148951291	-0.655134500168849	32.6972113387218	1538.35224670018	291.662753251898	966.693250326456	2110.0112430739	1554.37328511945	292.909506082338	980.27065319807	2128.47591704084	0.0264303227347532	0.00147365953151559	0.0235419500529826	0.0293186954165237
14	PreTest, EntryTest, ExitTest, TestEvery2Days, PCR 0D	7	2.83759455050631	3.56310768540569	-4.14609651288885	9.82128561390148	849.438745754127	175.330503615617	505.790958667518	1193.08653284074	852.276340304633	175.761553956215	507.783694550452	1196.76898605881	0.0152396881379499	0.00113453877086737	0.0130159921470499	0.01746338412885
14	PreTest, EntryTest, ExitTest, TestEvery2Days, PCR 0D	8	1.14279639536617	2.30924047335304	-3.38331493240579	5.66890772313813	517.632250478536	113.289676107975	295.584485306905	739.680015650167	518.775046873902	113.552784105903	296.211590026332	741.338503721472	0.00969602712314217	0.000876252277399073	0.00797857265943999	0.0114134815868444
14	PreTest, EntryTest, ExitTest, TestEvery2Days, PCR 0D	9	0.194723051521545	0.880189566899146	-1.53044849960078	1.91989460264387	272.879350322363	65.7461867518845	144.01682428867	401.741876356057	273.074073373885	65.7725448807726	144.159885407571	401.988261340199	0.00537358090593527	0.000654073636638885	0.00409159657812306	0.00665556523374749
14	PreTest, EntryTest, ExitTest, TestEvery2Days, PCR 0D	10	0.0805628225405879	0.614075491480949	-1.12302514076207	1.28415078584325	160.914080760805	43.8339091104196	74.9996189043829	246.828542617227	160.994643583346	43.8790349226617	74.9917351349289	246.997552031763	0.00332437921966049	0.000533105585025144	0.0022794922730112	0.00436926616630977
14	PreTest, EntryTest, ExitTest, TestEvery2Days, PCR 0D	11	0.0187040873414756	0.269109971432725	-0.508751456666665	0.546159631349616	83.6413137822699	26.6981043652484	31.3130292263831	135.969598338157	83.6600178696114	26.7031986484737	31.3217485186028	135.99828722062	0.00182321218345524	0.000386809352846488	0.00106506585187613	0.00258135851503436
14	PreTest, EntryTest, ExitTest, TestEvery2Days, PCR 0D	12	0.0120345860790108	0.233652884301326	-0.445925067151589	0.469994239309611	49.0258400071743	18.007667326433	13.7308120473655	84.3208679669831	49.0378745932533	18.0146440293575	13.7291722957126	84.346576890794	0.00112861909071604	0.00030139774957823	0.00053787950154271	0.00171935867988937
14	PreTest, EntryTest, ExitTest, TestEvery2Days, PCR 0D	13	0	0	0	0	25.073667417937	12.2533293953177	1.05714180311427	49.0901930327597	25.073667417937	12.2533293953177	1.05714180311427	49.0901930327597	0.000610701577703636	0.000232714064707282	0.000154582010877363	0.00106682114452991
14	PreTest, EntryTest, ExitTest, TestEvery2Days, PCR 0D	14	0	0	0	0	14.2749923933887	8.43800754558207	-2.2635023959522	30.8134871827295	14.2749923933887	8.43800754558207	-2.2635023959522	30.8134871827295	0.000367777235536908	0.000177545410037589	1.97882318632327e-05	0.000715766239210583
14	PreTest, EntryTest, ExitTest, TestEvery2Days, PCR 0D	15	0	0	0	0	7.18705288284722	5.52055890464587	-3.63324257025869	18.0073483359531	7.18705288284722	5.52055890464587	-3.63324257025869	18.0073483359531	0.00019770249018839	0.000130336236865999	-5.77565340689688e-05	0.000453161514445748
14	PreTest, EntryTest, ExitTest, TestEvery2Days, PCR 0D	16	0	0	0	0	4.09202723678466	4.06792019335856	-3.88109634219811	12.0651508157674	4.09202723678466	4.06792019335856	-3.88109634219811	12.0651508157674	0.000120018509674064	0.00010113589322402	-7.8207841045015e-05	0.000318244860393143
14	PreTest, EntryTest, ExitTest, TestEvery2Days, PCR 0D	17	0	0	0	0	2.01064554485506	2.53116345830566	-2.95043483342402	6.97172592313414	2.01064554485506	2.53116345830566	-2.95043483342402	6.97172592313414	6.39169767377619e-05	7.23355027051796e-05	-7.78606085643901e-05	0.000205694562039914
14	PreTest, EntryTest, ExitTest, TestEvery2Days, PCR 0D	18	0	0	0	0	1.11371610217251	1.81830326308139	-2.45015829346701	4.67759049781204	1.11371610217251	1.81830326308139	-2.45015829346701	4.67759049781204	3.85597242979601e-05	5.69629256926899e-05	-7.30876100597121e-05	0.000150207058655632
14	PreTest, EntryTest, ExitTest, TestEvery2Days, PCR 0D	19	0	0	0	0	0.593730278256938	1.28128767699754	-1.91759356865823	3.10505412517211	0.593730278256938	1.28128767699754	-1.91759356865823	3.10505412517211	2.27787966842677e-05	4.41956223510109e-05	-6.38446231237135e-05	0.000109402216492249
14	PreTest, EntryTest, ExitTest, TestEvery2Days, PCR 0D	20	0	0	0	0	0.338926597747015	0.947033877404581	-1.51725980196596	2.19511299745999	0.338926597747015	0.947033877404581	-1.51725980196596	2.19511299745999	1.4034275708362e-05	3.48889141896717e-05	-5.43479961033945e-05	8.24165475201185e-05
14	PreTest, EntryTest, ExitTest, TestEvery2Days, PCR 0D	21	0	0	0	0	0.157103756899274	0.594915711204048	-1.00893103706066	1.32313855085921	0.157103756899274	0.594915711204048	-1.00893103706066	1.32313855085921	7.52721386639176e-06	2.50110097811258e-05	-4.14943653046148e-05	5.65487930373984e-05
15	PreTest, EntryTest, ExitTest, TestEvery2Days, Antigen	0	30289.4470439882	3549.88567068854	23331.6711294387	37247.2229585378	40239.5902678663	8484.67697768167	23609.6233916102	56869.5571441224	70529.0373118545	9299.23316497258	52302.5403085083	88755.5343152008	0.877967150352546	0.00300469749526968	0.872077943261817	0.883856357443274
15	PreTest, EntryTest, ExitTest, TestEvery2Days, Antigen	1	18116.4038694814	2141.2269483243	13919.5990507658	22313.208688197	28884.037404614	5907.94324502461	17304.4686443658	40463.6061648622	47000.4412740954	6450.34075622493	34357.7733918945	59643.1091562962	0.609151600249469	0.00454088406648429	0.600251467479159	0.618051733019778
15	PreTest, EntryTest, ExitTest, TestEvery2Days, Antigen	2	9387.18800210432	1144.7594507507	7143.45947863296	11630.9165255757	20682.0021349805	3964.75157147152	12911.0890548963	28452.9152150647	30069.1901370848	4321.56491716362	21598.9228994441	38539.4573747255	0.408745391258372	0.00467848469850117	0.399575561249309	0.417915221267434
15	PreTest, EntryTest, ExitTest, TestEvery2Days, Antigen	3	3270.15261167028	417.65297973381	2451.55277139201	4088.75245194855	14056.4281085819	2486.26080016458	9183.35694025936	18929.4992769045	17326.5807202522	2648.30052636632	12135.9116885742	22517.2497519302	0.250574253913236	0.00419411789086812	0.242353782847134	0.258794724979337
15	PreTest, EntryTest, ExitTest, TestEvery2Days, Antigen	4	1217.55940517665	172.882376307426	878.709947614092	1556.4088627392	9683.74898703721	1685.6487160108	6379.87750365604	12987.6204704184	10901.3083922139	1762.15861702871	7447.47750283758	14355.1392815901	0.166113538020379	0.00349108894755751	0.159271003683166	0.172956072357591
15	PreTest, EntryTest, ExitTest, TestEvery2Days, Antigen	5	346.892081402896	61.5532675337744	226.247677036698	467.536485769094	6627.51420598954	1169.86380339897	4334.58115132757	8920.44726065152	6974.40628739244	1197.21346312403	4627.86789966933	9320.94467511555	0.112111965529393	0.00288328307115958	0.106460730709921	0.117763200348866
15	PreTest, EntryTest, ExitTest, TestEvery2Days, Antigen	6	118.451575780181	27.7035946070279	64.1525303504062	172.750621209956	4479.26627933377	822.362005840169	2867.43674788704	6091.09581078051	4597.71785511396	832.611458581148	2965.79939629491	6229.63631393301	0.0773656570073623	0.00243027069826048	0.0726023264387718	0.0821289875759528
15	PreTest, EntryTest, ExitTest, TestEvery2Days, Antigen	7	34.3965318238072	13.4386623933696	8.05675353280275	60.7363101148116	2985.45363838695	571.90683651216	1864.51623882312	4106.39103795078	3019.85017021076	575.714671108498	1891.4494148381	4148.25092558341	0.053287808099552	0.00201019664317221	0.0493478226789345	0.0572277935201695
15	PreTest, EntryTest, ExitTest, TestEvery2Days, Antigen	8	12.6284933810198	7.3308507319121	-1.73997405352788	26.9969608155675	1979.61934167201	401.067392390232	1193.52725258715	2765.71143075686	1992.24783505303	402.052080225569	1204.22575781091	2780.26991229514	0.0368049283847396	0.00173080638022923	0.0334125478794903	0.0401973088899889
15	PreTest, EntryTest, ExitTest, TestEvery2Days, Antigen	9	3.63348635271624	3.89734990998124	-4.00531947084699	11.2722921762795	1283.55214814771	275.408994698183	743.750518539273	1823.35377775615	1287.18563450043	275.609805305153	746.990416102329	1827.38085289853	0.0249589288782682	0.00138722165705808	0.0222399744304344	0.0276778833261021
15	PreTest, EntryTest, ExitTest, TestEvery2Days, Antigen	10	1.45218318715495	2.514321263286	-3.47588648888561	6.3802528631955	840.670344846878	192.776284196502	462.828827821734	1218.51186187202	842.122528034033	192.859211427242	464.118473636638	1220.12658243143	0.0171455839299045	0.00119173982279724	0.0148097738772219	0.0194813939825871
15	PreTest, EntryTest, ExitTest, TestEvery2Days, Antigen	11	0.555615389913984	1.52515903131102	-2.43369631145562	3.54492709128359	541.505363974371	136.825255007065	273.327864160524	809.682863788217	542.060979364285	136.93375434662	273.67082084491	810.45113788366	0.0116146070342205	0.000981116940661251	0.00969161783052441	0.0135375962379165
15	PreTest, EntryTest, ExitTest, TestEvery2Days, Antigen	12	0.239753972825634	0.988484589145219	-1.697675821899	2.17718376755026	351.113364677013	94.8858102847125	165.137176518977	537.08955283505	351.353118649839	94.9613616136506	165.228849887084	537.477387412594	0.00794649222219129	0.000816959723257811	0.00634525116460598	0.0095477332797766
15	PreTest, EntryTest, ExitTest, TestEvery2Days, Antigen	13	0.0930402462769333	0.621593366630733	-1.1252827523193	1.31136324487317	224.785568955502	66.9344103795975	93.5941246114913	355.977013299513	224.878609201779	67.0217884982155	93.5159037452769	356.241314658282	0.00538065440074237	0.000668488761508698	0.00407041642818533	0.00669089237329942
15	PreTest, EntryTest, ExitTest, TestEvery2Days, Antigen	14	0.0529165653317575	0.480730792292366	-0.88931578756128	0.995148918224795	145.18395954678	48.5593812183125	50.0075723588875	240.360346734672	145.236876112112	48.6305608206701	49.9209769035983	240.552775320625	0.00367903790565345	0.00056275780267426	0.0025760326124119	0.004782043198895
15	PreTest, EntryTest, ExitTest, TestEvery2Days, Antigen	15	0.0159204047009937	0.232872125783849	-0.440508961835351	0.472349771237338	92.4432149611652	35.0779037645798	23.6905235825888	161.195906339742	92.4591353658662	35.0733669208449	23.7153362010102	161.202934530722	0.0024936708852553	0.000465083492898641	0.00158210723917396	0.00340523453133664
15	PreTest, EntryTest, ExitTest, TestEvery2Days, Antigen	16	0.00852425248016658	0.161715160008018	-0.308437461135549	0.325485966095882	59.4836988220567	25.3139917016227	9.86827508687608	109.099122557237	59.4922230745368	25.3081556503813	9.8882379997895	109.096208149284	0.00171402569230872	0.000387454318904773	0.000954615227255368	0.00247343615736208
15	PreTest, EntryTest, ExitTest, TestEvery2Days, Antigen	17	0	0	0	0	37.9634360030242	18.608086084597	1.49158727721414	74.4352847288344	37.9634360030242	18.608086084597	1.49158727721414	74.4352847288344	0.00117185056410493	0.000312515559202624	0.000559320068067782	0.00178438106014207
15	PreTest, EntryTest, ExitTest, TestEvery2Days, Antigen	18	0	0	0	0	24.7321641257591	13.6953184742498	-2.11066008377053	51.5749883352887	24.7321641257591	13.6953184742498	-2.11066008377053	51.5749883352887	0.000820389985815851	0.00025897980827631	0.000312789561594283	0.00132799041003742
15	PreTest, EntryTest, ExitTest, TestEvery2Days, Antigen	19	0	0	0	0	15.7996158608325	10.1364242471672	-4.06777566361516	35.6670073852802	15.7996158608325	10.1364242471672	-4.06777566361516	35.6670073852802	0.00056699533158636	0.000219384585184303	0.000137001544625125	0.000996989118547595
15	PreTest, EntryTest, ExitTest, TestEvery2Days, Antigen	20	0	0	0	0	10.2110156681805	7.45391677048811	-4.3986612019762	24.8206925383372	10.2110156681805	7.45391677048811	-4.3986612019762	24.8206925383372	0.000398459985162945	0.000185934687571513	3.40279975227795e-05	0.00076289197280311
15	PreTest, EntryTest, ExitTest, TestEvery2Days, Antigen	21	0	0	0	0	6.50492643882342	5.46992470762618	-4.21612598812389	17.2259788657707	6.50492643882342	5.46992470762618	-4.21612598812389	17.2259788657707	0.000277561569779199	0.000157293718801137	-3.07341190710304e-05	0.000585857258629428
16	PreTest, EntryTest, ExitTest, TestEvery2Days, PCR 1D	0	27806.5804837657	3257.69072470354	21421.5066633468	34191.6543041846	35319.4708954034	7569.7058104928	20482.8475068375	50156.0942839693	63126.0513791691	8298.5258977329	46860.9406196126	79391.1621387256	0.783906154312719	0.00376847825541488	0.776519936932106	0.791292371693332
16	PreTest, EntryTest, ExitTest, TestEvery2Days, PCR 1D	1	19249.2702612943	2276.90108255192	14786.5441394925	23711.996383096	26861.1817484733	5736.12619906953	15618.374398297	38103.9890986496	46110.4520097676	6281.73210419749	33798.2570855405	58422.6469339947	0.593344329696074	0.00461018876513331	0.584308359716413	0.602380299675736
16	PreTest, EntryTest, ExitTest, TestEvery2Days, PCR 1D	2	6244.50348515671	766.98836954507	4741.20628084838	7747.80068946505	12692.6180447924	2494.55253516873	7803.29507586165	17581.9410137231	18937.1215299491	2730.99619932504	13584.368979272	24289.8740806262	0.256187870595139	0.00416044368093342	0.248033400980509	0.264342340209768
16	PreTest, EntryTest, ExitTest, TestEvery2Days, PCR 1D	3	2258.24094547327	297.199301506422	1675.73031452068	2840.75157642585	8399.30971709678	1520.09335223019	5419.92674672561	11378.692687468	10657.5506625701	1633.11343203882	7456.64833577396	13858.4529893661	0.153020167352725	0.00345875801284231	0.146241001647554	0.159799333057896
16	PreTest, EntryTest, ExitTest, TestEvery2Days, PCR 1D	4	382.384196567569	64.0823204801299	256.782848426514	507.985544708623	4280.15654829764	751.938321951949	2806.35743727182	5753.95565932346	4662.54074486521	776.450498202635	3140.69776838805	6184.38372134237	0.0714514528154607	0.00237464669690168	0.0667971452895334	0.076105760341388
16	PreTest, EntryTest, ExitTest, TestEvery2Days, PCR 1D	5	129.689399158901	29.0999921362204	72.653414571909	186.725383745893	2908.71625403706	522.93633423753	1883.7610389315	3933.67146914262	3038.40565319596	533.231025344662	1993.27284352042	4083.5384628715	0.0488882251424913	0.00202367385303008	0.0449218243905524	0.0528546258944303
16	PreTest, EntryTest, ExitTest, TestEvery2Days, PCR 1D	6	20.377043738659	9.65256964838854	1.45800722781749	39.2960802495006	1504.67996297034	290.136458556986	936.012504198652	2073.34742174204	1525.057006709	292.087568003591	952.565373421965	2097.54863999604	0.0258565086247096	0.00147348918649413	0.0229684698191812	0.0287445474302381
16	PreTest, EntryTest, ExitTest, TestEvery2Days, PCR 1D	7	7.72942416307354	5.92184325176649	-3.87738861038878	19.3362369365359	988.194931769115	198.908499675469	598.334272405195	1378.05559113303	995.924355932188	199.64299302578	604.624089601659	1387.22462226272	0.0176646293753292	0.00124601509322708	0.0152224397926042	0.0201068189580543
16	PreTest, EntryTest, ExitTest, TestEvery2Days, PCR 1D	8	1.3216350958947	2.4250232859152	-3.4314105444991	6.07468073628849	507.70383999428	112.202017240705	287.787886202498	727.619793786061	509.025475090174	112.311282772948	288.895360855197	729.155589325152	0.00950352363685661	0.000883600394656432	0.00777166686333	0.0112353804103832
16	PreTest, EntryTest, ExitTest, TestEvery2Days, PCR 1D	9	0.541657871451551	1.51947012280799	-2.43650356925211	3.51981931215521	311.425654507984	77.8744417063799	158.791748763479	464.059560252488	311.967312379435	78.020578581257	159.046978360171	464.887646398699	0.00608672432080082	0.000728717414016604	0.00465843818932828	0.00751501045227337
16	PreTest, EntryTest, ExitTest, TestEvery2Days, PCR 1D	10	0.0953165992927951	0.633545661236231	-1.14643289673022	1.33706609531581	159.50246229626	45.3089731418692	70.696874938196	248.308049654323	159.597778895552	45.318700018183	70.7731268599137	248.422430931191	0.00328341076103406	0.00051747054303617	0.00226916849668317	0.00429765302538496
16	PreTest, EntryTest, ExitTest, TestEvery2Days, PCR 1D	11	0.0596601540832954	0.511564745466329	-0.943006747030709	1.0623270551973	95.7904809640092	31.3478712590891	34.3486532961945	157.232308631824	95.8501411180924	31.3500077915524	34.4041258466498	157.296156389535	0.00206895055256982	0.000411346925804168	0.00126271057799365	0.00287519052714599
16	PreTest, EntryTest, ExitTest, TestEvery2Days, PCR 1D	12	0.00544608231720651	0.172220244471402	-0.332105596846741	0.342997761481154	48.5057880799849	18.8315124079201	11.5960237604615	85.4155523995082	48.5112341623021	18.8304019052837	11.6036464279459	85.4188218966582	0.0011118074857681	0.000311427165697774	0.000501410241000466	0.00172220473053574
16	PreTest, EntryTest, ExitTest, TestEvery2Days, PCR 1D	13	0.00843244579094696	0.189236087195717	-0.362470285112659	0.379335176694553	28.1664431333849	13.1960935074956	2.30209985869359	54.0307864080762	28.1748755791759	13.2055808213216	2.2919371693856	54.0578139889661	0.000681578358904451	0.0002418724477916	0.000207508361232915	0.00115564835657599
16	PreTest, EntryTest, ExitTest, TestEvery2Days, PCR 1D	14	0	0	0	0	14.5328007798116	8.60392235562967	-2.33088703722252	31.3964885968458	14.5328007798116	8.60392235562967	-2.33088703722252	31.3964885968458	0.000372164607485668	0.000178236667610619	2.28207389688552e-05	0.00072150847600248
16	PreTest, EntryTest, ExitTest, TestEvery2Days, PCR 1D	15	0	0	0	0	8.47832693536257	6.31164200618311	-3.89249139675631	20.8491452674815	8.47832693536257	6.31164200618311	-3.89249139675631	20.8491452674815	0.000229337695504042	0.000143531442924105	-5.19839326272031e-05	0.000510659323635288
16	PreTest, EntryTest, ExitTest, TestEvery2Days, PCR 1D	16	0	0	0	0	4.16390398705775	4.30289445623406	-4.26976914716101	12.5975771212765	4.16390398705775	4.30289445623406	-4.26976914716101	12.5975771212765	0.000120288537451943	0.000107294561406764	-9.00088029053153e-05	0.000330585877809201
16	PreTest, EntryTest, ExitTest, TestEvery2Days, PCR 1D	17	0	0	0	0	2.36053817259352	2.99543006130275	-3.51050474755987	8.23158109274691	2.36053817259352	2.99543006130275	-3.51050474755987	8.23158109274691	7.32335135806657e-05	8.06399357883825e-05	-8.48207605645641e-05	0.000231287787725895
16	PreTest, EntryTest, ExitTest, TestEvery2Days, PCR 1D	18	0	0	0	0	1.28538052796719	2.1952264767757	-3.01726336651318	5.58802442244757	1.28538052796719	2.1952264767757	-3.01726336651318	5.58802442244757	4.23841941682447e-05	6.15808459682006e-05	-7.83142639294285e-05	0.000163082652265918
16	PreTest, EntryTest, ExitTest, TestEvery2Days, PCR 1D	19	0	0	0	0	0.655580451085402	1.39632833970073	-2.08122309472803	3.39238399689883	0.655580451085402	1.39632833970073	-2.08122309472803	3.39238399689883	2.40102680367103e-05	4.49327769713384e-05	-6.4057974827113e-05	0.000112078510900534
16	PreTest, EntryTest, ExitTest, TestEvery2Days, PCR 1D	20	0	0	0	0	0.340984793224893	1.0391199683904	-1.6956903448203	2.37765993127009	0.340984793224893	1.0391199683904	-1.6956903448203	2.37765993127009	1.38575233330449e-05	3.53422381701348e-05	-5.54132634804193e-05	8.31283101465092e-05
16	PreTest, EntryTest, ExitTest, TestEvery2Days, PCR 1D	21	0	0	0	0	0.195067018970974	0.821426729027491	-1.41492936992291	1.80506340786486	0.195067018970974	0.821426729027491	-1.41492936992291	1.80506340786486	8.47687245341622e-06	2.82106101317155e-05	-4.68159234047462e-05	6.37696683115786e-05
17	PreTest, EntryTest, ExitTest, TestEvery2Days, PCR 2D	0	29769.9954157289	3484.93765135354	22939.517619076	36600.4732123819	36787.9711609301	7965.66808402419	21175.2617162427	52400.6806056175	66557.966576659	8728.31323337059	49450.4726392527	83665.4605140654	0.825292078462906	0.00348632382690093	0.81845888376218	0.832125273163632
17	PreTest, EntryTest, ExitTest, TestEvery2Days, PCR 2D	1	20300.8040795103	2403.60470822531	15589.7388513887	25011.8693076319	27984.5455652824	5998.93925798422	16226.6246196333	39742.4665109315	48285.3496447928	6569.52611493073	35409.0784595285	61161.620830057	0.620952009633073	0.00452148665479008	0.612089895789685	0.629814123476462
17	PreTest, EntryTest, ExitTest, TestEvery2Days, PCR 2D	2	11041.748730346	1344.71581830913	8406.10572646009	13677.3917342319	20169.1033457108	4049.36512649474	12232.3476977811	28105.8589936404	31210.8520760568	4450.01438901106	22488.8238735951	39932.8802785184	0.420429248254623	0.00472623718860651	0.411165823364955	0.429692673144292
17	PreTest, EntryTest, ExitTest, TestEvery2Days, PCR 2D	3	3236.70575601916	414.732251716261	2423.83054265529	4049.58096938304	9381.70470873587	1745.64222034656	5960.24595685661	12803.1634606151	12618.410464755	1900.63034246644	8893.1749935208	16343.6459359893	0.179504941665116	0.00366517859725998	0.172321191614487	0.186688691715746
17	PreTest, EntryTest, ExitTest, TestEvery2Days, PCR 2D	4	1023.92804832142	148.980186336498	731.92688310188	1315.92921354095	5978.19232733137	1066.53100048463	3887.79156638149	8068.59308828124	7002.12037565278	1132.83093978624	4781.77173367176	9222.4690176338	0.105595824428284	0.00281545721969032	0.100077528277691	0.111114120578877
17	PreTest, EntryTest, ExitTest, TestEvery2Days, PCR 2D	5	186.611002383347	38.213073675941	111.713377978503	261.508626788191	2994.73820984222	537.343786290953	1941.54438871195	4047.93203097249	3181.34921222557	552.84499194123	2097.77302802076	4264.92539643038	0.0508415148455388	0.00195246792140462	0.0470146777195857	0.0546683519714918
17	PreTest, EntryTest, ExitTest, TestEvery2Days, PCR 2D	6	59.365370837611	18.0540344857666	23.9794632455084	94.7512784297135	1944.79325757687	360.971202495333	1237.28970068601	2652.29681446772	2004.15862841448	366.582844241027	1285.65625370206	2722.66100312689	0.0335943951346067	0.00169516655475363	0.0302718686872896	0.0369169215819238
17	PreTest, EntryTest, ExitTest, TestEvery2Days, PCR 2D	7	10.3043838147096	6.83476387004369	-3.09175337057599	23.7005209999953	977.111239567323	197.422612976498	590.162918133387	1364.05956100126	987.415623382033	198.643261266823	598.074831299059	1376.75641546501	0.0174432984695281	0.00118837740152095	0.015114078762547	0.0197725181765091
17	PreTest, EntryTest, ExitTest, TestEvery2Days, PCR 2D	8	3.83003738903314	4.07888463716208	-4.16457649980454	11.8246512778708	629.600670264985	136.319826328395	362.41381066133	896.78752986864	633.430707654019	136.764344155449	365.372593109338	901.488822198699	0.0117133450469209	0.000990107668537176	0.00977273401658802	0.0136539560772538
17	PreTest, EntryTest, ExitTest, TestEvery2Days, PCR 2D	9	0.653341947727336	1.65694464057254	-2.59426954779484	3.90095344324951	306.003376204577	73.5781133770635	161.790273985533	450.216478423622	306.656718152305	73.615643102248	162.370057671899	450.943378632711	0.00598250713746284	0.000698991604291607	0.00461248359305129	0.00735253068187439
17	PreTest, EntryTest, ExitTest, TestEvery2Days, PCR 2D	10	0.294045921966095	1.12505984245986	-1.91107136925523	2.49916321318742	190.147659757698	52.2329596003929	87.7710589409274	292.524260574468	190.441705679664	52.2521235647612	88.0275434927316	292.855867866596	0.00389035073624105	0.000576685979520802	0.00276004621638028	0.00502065525610182
17	PreTest, EntryTest, ExitTest, TestEvery2Days, PCR 2D	11	0.0688750892161871	0.547791085127028	-1.00479543763279	1.14254561606516	93.8267543188476	31.5534274392819	31.9820365378551	155.67147209984	93.8956294080638	31.5738370908419	32.0109087100137	155.780350106114	0.00202902459844232	0.00043576893244132	0.00117491749085733	0.00288313170602731
17	PreTest, EntryTest, ExitTest, TestEvery2Days, PCR 2D	12	0.0570382531587354	0.484371318173147	-0.892329530460634	1.0064060367781	56.9472206097271	21.1141191139053	15.5635471464727	98.3308940729815	57.0042588628858	21.1484525582852	15.5532918486468	98.4552258771249	0.00129694998095633	0.000330525926820518	0.000649119164388118	0.00194478079752455
17	PreTest, EntryTest, ExitTest, TestEvery2Days, PCR 2D	13	0.00672730244395448	0.153086114348943	-0.293321481679974	0.306776086567883	27.9784591245936	13.1219688986793	2.25940008318211	53.6975181660051	27.9851864270376	13.1205105747277	2.26898570057118	53.701387153504	0.00067734693942361	0.000241071355424314	0.000204847082791955	0.00114984679605527
17	PreTest, EntryTest, ExitTest, TestEvery2Days, PCR 2D	14	0.00380019538726544	0.120172729774244	-0.231738354970253	0.239338745744784	16.5106737146234	9.21924854608564	-1.55905343570447	34.5804008649512	16.5144739100107	9.21642009113532	-1.54970946861457	34.5786572886359	0.000424344054322636	0.00019547203451019	4.12188666826643e-05	0.000807469241962608
17	PreTest, EntryTest, ExitTest, TestEvery2Days, PCR 2D	15	0	0	0	0	7.945236167467	5.92976398939082	-3.67710125173901	19.567573586673	7.945236167467	5.92976398939082	-3.67710125173901	19.567573586673	0.000216993817660663	0.000138942642525495	-5.53337616893062e-05	0.000489321397010633
17	PreTest, EntryTest, ExitTest, TestEvery2Days, PCR 2D	16	0	0	0	0	4.5896573606294	4.22610791184826	-3.69351414659318	12.872828867852	4.5896573606294	4.22610791184826	-3.69351414659318	12.872828867852	0.000133532762033472	0.000107826908373127	-7.78079783778575e-05	0.000344873502444802
17	PreTest, EntryTest, ExitTest, TestEvery2Days, PCR 2D	17	0	0	0	0	2.17645280563063	2.86533231062553	-3.43959852319542	7.79250413445667	2.17645280563063	2.86533231062553	-3.43959852319542	7.79250413445667	6.81845493113688e-05	7.84944699876281e-05	-8.56646118643823e-05	0.00022203371048712
17	PreTest, EntryTest, ExitTest, TestEvery2Days, PCR 2D	18	0	0	0	0	1.20378342628451	1.99636304890371	-2.70908814956676	5.11665500213578	1.20378342628451	1.99636304890371	-2.70908814956676	5.11665500213578	4.0973444227784e-05	5.75966740833767e-05	-7.19160369756343e-05	0.000153862925431202
17	PreTest, EntryTest, ExitTest, TestEvery2Days, PCR 2D	19	0	0	0	0	0.583255190174376	1.34148298329928	-2.0460514570922	3.21256183744096	0.583255190174376	1.34148298329928	-2.0460514570922	3.21256183744096	2.15778409307503e-05	4.44727401820376e-05	-6.55887298260434e-05	0.000108744411687544
17	PreTest, EntryTest, ExitTest, TestEvery2Days, PCR 2D	20	0	0	0	0	0.345893839696512	0.956054845910001	-1.52797365828709	2.21976133768012	0.345893839696512	0.956054845910001	-1.52797365828709	2.21976133768012	1.35238828224766e-05	3.40169097608971e-05	-5.31492603088817e-05	8.01970259538349e-05
17	PreTest, EntryTest, ExitTest, TestEvery2Days, PCR 2D	21	0	0	0	0	0.181430982740681	0.730300807092913	-1.24995859916143	1.61282056464279	0.181430982740681	0.730300807092913	-1.24995859916143	1.61282056464279	7.53426204538686e-06	2.59042431669538e-05	-4.32380545618426e-05	5.83065786526163e-05
18	PreTest, EntryTest, ExitTest, TestEvery3Days, PCR 0D	0	24304.1593789663	2853.07116128856	18712.1399028407	29896.1788550919	33688.8021679097	7010.38299303003	19948.4515015709	47429.1528342486	57992.961546876	7678.6441684127	42942.8189767871	73043.1041169649	0.724130553589301	0.00411414034876668	0.716066838505718	0.732194268672884
18	PreTest, EntryTest, ExitTest, TestEvery3Days, PCR 0D	1	9331.13243539918	1113.5476830837	7148.57897655513	11513.6858942432	17031.683495536	3376.39769651212	10413.9440103722	23649.4229806997	26362.8159309352	3674.59769169627	19160.6044552105	33565.0274066598	0.344608878374431	0.00450422633225448	0.335780594763212	0.35343716198565
18	PreTest, EntryTest, ExitTest, TestEvery3Days, PCR 0D	2	4061.14840301114	505.037593441559	3071.27471986568	5051.02208615659	11508.6319506179	2119.84884286161	7353.72821860915	15663.5356826267	15569.780353629	2282.72303109032	11095.643212692	20043.9174945661	0.214010294359992	0.00394272352586301	0.2062825562493	0.221738032470683
18	PreTest, EntryTest, ExitTest, TestEvery3Days, PCR 0D	3	1400.45447504569	187.270086633893	1033.40510524326	1767.50384484812	7955.01004790571	1388.42845404864	5233.69027797038	10676.329817841	9355.4645229514	1460.16767251501	6493.53588482198	12217.3931610808	0.136399130568696	0.00323881669243132	0.130051049851531	0.142747211285861
18	PreTest, EntryTest, ExitTest, TestEvery3Days, PCR 0D	4	212.490745604177	40.7974169289452	132.527808423444	292.453682784909	4414.93325689307	760.793745088514	2923.77751651958	5906.08899726656	4627.42400249725	774.42461358987	3109.5517598611	6145.29624513339	0.0719152488709208	0.00243884211576508	0.0671351183240213	0.0766953794178204
18	PreTest, EntryTest, ExitTest, TestEvery3Days, PCR 0D	5	74.8386180336969	21.8855735916693	31.9428937940251	117.734342273369	3055.72753556105	542.007364205488	1993.3931017183	4118.06196940381	3130.56615359475	548.296492389876	2055.90502851059	4205.2272786789	0.050891959386778	0.00198540548922629	0.0470005646278945	0.0547833541456616
18	PreTest, EntryTest, ExitTest, TestEvery3Days, PCR 0D	6	26.7488832731209	11.1425778265278	4.90943073312644	48.5883358131153	2008.71323625592	371.828825941009	1279.92873741154	2737.4977351003	2035.46211952904	374.305162929773	1301.82400018669	2769.1002388714	0.0345515670415511	0.00173125825636254	0.0311583008590806	0.0379448332240217
18	PreTest, EntryTest, ExitTest, TestEvery3Days, PCR 0D	7	4.17791346029639	4.2061463924626	-4.0661334689303	12.4219603895231	1114.40023498131	218.393160333096	686.349640728445	1542.45082923418	1118.57814844161	218.906243829957	689.521910534894	1547.63438634832	0.0199962485788282	0.00124541853287541	0.0175552282543924	0.022437268903264
18	PreTest, EntryTest, ExitTest, TestEvery3Days, PCR 0D	8	1.53219831672841	2.68941142123572	-3.73904806889361	6.80344470235042	698.369232017626	146.730546585742	410.777360709571	985.961103325681	699.901430334354	146.89929145396	411.978819084593	987.824041584115	0.0130791157658351	0.0010060726392711	0.0111072133928637	0.0150510181388064
18	PreTest, EntryTest, ExitTest, TestEvery3Days, PCR 0D	9	0.60666275710827	1.60053152827295	-2.53037903830671	3.74370455252325	444.635053161388	100.312165282508	248.023209207673	641.246897115103	445.241715918496	100.395376224049	248.46677851936	642.016653317632	0.00871371528428871	0.000822022230534031	0.00710255171244201	0.0103248788561354
18	PreTest, EntryTest, ExitTest, TestEvery3Days, PCR 0D	10	0.13663544155617	0.761108338974034	-1.35513690283294	1.62840778594528	240.599896194527	60.2652501467979	122.480005906803	358.719786482251	240.736531636083	60.2764527603239	122.594684225848	358.878379046318	0.00497882774645803	0.000641130269240651	0.00372221241874636	0.00623544307416971
18	PreTest, EntryTest, ExitTest, TestEvery3Days, PCR 0D	11	0.0395508582560098	0.401016919011141	-0.746442303005826	0.825544019517846	146.551187661354	42.0387014947218	64.1553327316993	228.947042591009	146.59073851961	42.0688313735206	64.1358290275095	229.04564801171	0.00318636077712937	0.000526402705843463	0.00215461147367618	0.00421811008058256
18	PreTest, EntryTest, ExitTest, TestEvery3Days, PCR 0D	12	0.0138976312101761	0.220233395594952	-0.417759824155929	0.445555086576282	88.9025607334633	29.0001720956829	32.0622234259247	145.742898041002	88.9164583646735	29.0059273232434	32.0648408111164	145.768075918231	0.00203947143066869	0.000432991770804225	0.00119080755989241	0.00288813530144498
18	PreTest, EntryTest, ExitTest, TestEvery3Days, PCR 0D	13	0.00334996425094006	0.105935171131104	-0.204282971166025	0.210982899667905	46.5534567629153	17.6444254957473	11.9703827912505	81.1365307345801	46.5568067271663	17.6457571675821	11.9711226787053	81.1424907756272	0.00113890425739993	0.000312067963867931	0.000527251048218785	0.00175055746658107
18	PreTest, EntryTest, ExitTest, TestEvery3Days, PCR 0D	14	0.00334996425094006	0.105935171131104	-0.204282971166025	0.210982899667905	27.6183121894506	12.5334139910068	3.05282076707731	52.1838036118239	27.6216621537015	12.5314382126808	3.06004325684726	52.1832810505558	0.00071554854923213	0.000248413354503346	0.000228658374405572	0.00120243872405869
18	PreTest, EntryTest, ExitTest, TestEvery3Days, PCR 0D	15	0	0	0	0	16.3414261687682	8.97814492209149	-1.25573787853108	33.9385902160676	16.3414261687682	8.97814492209149	-1.25573787853108	33.9385902160676	0.000450207518010404	0.000198973863829568	6.02187449044519e-05	0.000840196291116357
18	PreTest, EntryTest, ExitTest, TestEvery3Days, PCR 0D	16	0	0	0	0	8.61779327590524	5.74787612437515	-2.64804392787004	19.8836304796805	8.61779327590524	5.74787612437515	-2.64804392787004	19.8836304796805	0.000255901751437476	0.000150858990421494	-3.97818697886524e-05	0.000551585372663604
18	PreTest, EntryTest, ExitTest, TestEvery3Days, PCR 0D	17	0	0	0	0	5.19382664553403	4.549943875741	-3.72406335091833	14.1117166419864	5.19382664553403	4.549943875741	-3.72406335091833	14.1117166419864	0.000165107057056788	0.000123797932257067	-7.75368901670638e-05	0.00040775100428064
18	PreTest, EntryTest, ExitTest, TestEvery3Days, PCR 0D	18	0	0	0	0	2.94444080758622	3.14614972096094	-3.22201264549722	9.11089426066965	2.94444080758622	3.14614972096094	-3.22201264549722	9.11089426066965	0.000101498708794947	9.5671089438296e-05	-8.60166265041133e-05	0.000289014044094007
18	PreTest, EntryTest, ExitTest, TestEvery3Days, PCR 0D	19	0	0	0	0	1.5466983302642	2.01496688288476	-2.40263676018992	5.49603342071832	1.5466983302642	2.01496688288476	-2.40263676018992	5.49603342071832	5.93943373275907e-05	7.06385993917229e-05	-7.90573174801861e-05	0.000197845992135368
18	PreTest, EntryTest, ExitTest, TestEvery3Days, PCR 0D	20	0	0	0	0	0.886284611327526	1.57020720044215	-2.19132150153908	3.96389072419413	0.886284611327526	1.57020720044215	-2.19132150153908	3.96389072419413	3.59338850374531e-05	5.66953582248383e-05	-7.518901708323e-05	0.000147056787158136
18	PreTest, EntryTest, ExitTest, TestEvery3Days, PCR 0D	21	0	0	0	0	0.504199910139943	1.10830585945373	-1.66807957438937	2.67647939466926	0.504199910139943	1.10830585945373	-1.66807957438937	2.67647939466926	2.27619663962211e-05	4.51446326536873e-05	-6.57215136050061e-05	0.000111245446397448
19	PreTest, EntryTest, ExitTest, TestEvery3Days, Antigen	0	30289.4470439882	3549.88567068854	23331.6711294387	37247.2229585378	40239.5902678663	8484.67697768167	23609.6233916102	56869.5571441224	70529.0373118545	9299.23316497258	52302.5403085083	88755.5343152008	0.877967150352546	0.00300469749526968	0.872077943261817	0.883856357443274
19	PreTest, EntryTest, ExitTest, TestEvery3Days, Antigen	1	18116.4038694814	2141.2269483243	13919.5990507658	22313.208688197	28884.037404614	5907.94324502461	17304.4686443658	40463.6061648622	47000.4412740954	6450.34075622493	34357.7733918945	59643.1091562962	0.609151600249469	0.00454088406648429	0.600251467479159	0.618051733019778
19	PreTest, EntryTest, ExitTest, TestEvery3Days, Antigen	2	9387.18800210432	1144.7594507507	7143.45947863296	11630.9165255757	20682.0021349805	3964.75157147152	12911.0890548963	28452.9152150647	30069.1901370848	4321.56491716362	21598.9228994441	38539.4573747255	0.408745391258372	0.00467848469850117	0.399575561249309	0.417915221267434
19	PreTest, EntryTest, ExitTest, TestEvery3Days, Antigen	3	3831.51862599674	485.188898655484	2880.548384632	4782.48886736149	14497.5992533375	2603.33512809785	9395.06240226567	19600.1361044093	18329.1178793342	2788.8743756511	12862.9241030581	23795.3116556104	0.263916243548588	0.0042337982259703	0.255617999025687	0.27221448807149
19	PreTest, EntryTest, ExitTest, TestEvery3Days, Antigen	4	1126.45053306491	161.500803896046	809.908957428659	1442.99210870116	9683.80775507938	1681.26286468391	6388.53254029891	12979.0829698599	10810.2582881443	1752.21829834405	7375.91042338994	14244.6061528986	0.165099188189406	0.00345026466944551	0.158336669437293	0.17186170694152
19	PreTest, EntryTest, ExitTest, TestEvery3Days, Antigen	5	389.367019803625	66.1735889014157	259.666785556851	519.0672540504	6779.93841007731	1197.65638844911	4432.53188871706	9127.34493143755	7169.30542988093	1225.44315695871	4767.43684224185	9571.17401752001	0.115077464539312	0.00290205301425689	0.109389440631369	0.120765488447256
19	PreTest, EntryTest, ExitTest, TestEvery3Days, Antigen	6	132.369197580977	30.2793960187988	73.0215813841312	191.716813777822	4591.76198967273	844.901988625281	2935.75409196718	6247.76988737828	4724.13118725371	856.811758459526	3044.78014067303	6403.48223383438	0.0794300504180688	0.00245473323003821	0.0746187732871939	0.0842413275489437
19	PreTest, EntryTest, ExitTest, TestEvery3Days, Antigen	7	36.682669115055	13.7258442022958	9.78001447855528	63.5853237515547	3063.60263850236	587.918087295237	1911.2831874037	4215.92208960103	3100.28530761742	591.968203643475	1940.02762847621	4260.54298675863	0.054684271483957	0.00204045817299725	0.0506849734648824	0.0586835695030316
19	PreTest, EntryTest, ExitTest, TestEvery3Days, Antigen	8	13.0715122286166	7.51405075218304	-1.65602724566218	27.7990517028953	2036.80085029469	413.233775452967	1226.86265040687	2846.7390501825	2049.8723625233	414.388480167563	1237.67094139488	2862.07378365173	0.0378583410340476	0.00175917389024163	0.034410360209174	0.0413063218589212
19	PreTest, EntryTest, ExitTest, TestEvery3Days, Antigen	9	4.77645949892526	4.43297487514572	-3.91217125636036	13.4650902542109	1345.3308094817	290.340293302663	776.26383460848	1914.39778435492	1350.10726898062	290.822396981082	780.095370897702	1920.11916706355	0.0261402430751807	0.00143638332193352	0.023324931764191	0.0289555543861705
19	PreTest, EntryTest, ExitTest, TestEvery3Days, Antigen	10	1.51773479570867	2.58269801151232	-3.54435330685548	6.57982289827282	873.682832905958	200.712660808581	480.286017721139	1267.07964809078	875.200567701667	200.818823999247	481.595672663143	1268.80546274019	0.0178166057889833	0.00120543339671253	0.0154539563314267	0.0201792552465399
19	PreTest, EntryTest, ExitTest, TestEvery3Days, Antigen	11	0.650275279986081	1.57769241412355	-2.44200185169608	3.74255241166824	571.711074132408	144.626476546508	288.243180101251	855.178968163564	572.361349412394	144.743281545099	288.664517583999	856.058181240788	0.0122500969643701	0.00101205804046894	0.010266463205051	0.0142337307236892
19	PreTest, EntryTest, ExitTest, TestEvery3Days, Antigen	12	0.273058405660839	1.04719106365578	-1.77943607910449	2.32555289042617	372.257242897404	99.7898580531741	176.669121113183	567.845364681625	372.530301303065	99.8292951638059	176.864882782005	568.195719824124	0.00841808836522086	0.000841348108077847	0.00676904607338828	0.0100671306570534
19	PreTest, EntryTest, ExitTest, TestEvery3Days, Antigen	13	0.111257269180467	0.648684849199992	-1.16016503525152	1.38267957361245	239.537516021921	70.8729129223983	100.62660669402	378.448425349822	239.648773291101	70.9077864120297	100.669511923523	378.62803465868	0.00572995881732817	0.00069751933022431	0.00436282093008852	0.00709709670456782
19	PreTest, EntryTest, ExitTest, TestEvery3Days, Antigen	14	0.0522114757746597	0.455649974924477	-0.840862475077315	0.945285426626634	155.430528074295	51.0663745100059	55.3404340346835	255.520622113907	155.48273955007	51.0914045877791	55.3435865580225	255.621892542117	0.0039384655293	0.000581175831364724	0.00279936089982514	0.00507757015877486
19	PreTest, EntryTest, ExitTest, TestEvery3Days, Antigen	15	0.0208509677687341	0.254945991563811	-0.478843175696336	0.520545111233804	100.816696447307	37.4500752127831	27.4145490302521	174.218843864362	100.837547415076	37.4439052712837	27.4474930833596	174.227601746792	0.00271511952076261	0.00048964010419818	0.00175542491653418	0.00367481412499104
19	PreTest, EntryTest, ExitTest, TestEvery3Days, Antigen	16	0.0079330106290882	0.147661852196924	-0.281484219676883	0.29735024093506	64.6160550071603	26.9595366293472	11.7753632136398	117.456746800681	64.6239880177894	26.9564844875548	11.789278422182	117.458697613397	0.00186023826384883	0.000406447048211189	0.0010636020493549	0.00265687447834276
19	PreTest, EntryTest, ExitTest, TestEvery3Days, Antigen	17	0.00317851679476911	0.100513526525684	-0.193827995195571	0.200185028785109	41.8018540666186	20.0096704698682	2.58289994567691	81.0208081875604	41.8050325834134	20.0110044193048	2.58346392157607	81.0266012452507	0.00128640279178182	0.000327377344476917	0.00064474319660706	0.00192806238695658
19	PreTest, EntryTest, ExitTest, TestEvery3Days, Antigen	18	0.00297129059727034	0.0939604587761636	-0.18119120860401	0.187133789798551	27.3867462633961	14.8579715518945	-1.73487797831702	56.5083705051093	27.3897175539934	14.8577645765965	-1.73150101613583	56.5109361241226	0.000905215539781728	0.000275117638310913	0.000365984968692338	0.00144444611087112
19	PreTest, EntryTest, ExitTest, TestEvery3Days, Antigen	19	0.00276406439977157	0.0874073910266434	-0.16855442201245	0.174082550811993	17.5996061608016	10.7270624221256	-3.42543618656448	38.6246485081677	17.6023702252014	10.7275215335516	-3.42357198055969	38.6283124309624	0.000629469665145776	0.000224694828812577	0.000189067800673126	0.00106987152961843
19	PreTest, EntryTest, ExitTest, TestEvery3Days, Antigen	20	0	0	0	0	11.4935043267539	8.01031987048756	-4.2067226194017	27.1937312729095	11.4935043267539	8.01031987048756	-4.2067226194017	27.1937312729095	0.000446652446090483	0.00018929627396911	7.56317491110273e-05	0.000817673143069939
19	PreTest, EntryTest, ExitTest, TestEvery3Days, Antigen	21	0	0	0	0	7.4632179857016	6.06554347179098	-4.42524721900873	19.3516831904119	7.4632179857016	6.06554347179098	-4.42524721900873	19.3516831904119	0.000315939004576307	0.000161051137047478	2.78775963251268e-07	0.000631599233189364
20	PreTest, EntryTest, ExitTest, TestEvery3Days, PCR 1D	0	27806.5804837657	3257.69072470354	21421.5066633468	34191.6543041846	35319.4708954034	7569.7058104928	20482.8475068375	50156.0942839693	63126.0513791691	8298.5258977329	46860.9406196126	79391.1621387256	0.783906154312719	0.00376847825541488	0.776519936932106	0.791292371693332
20	PreTest, EntryTest, ExitTest, TestEvery3Days, PCR 1D	1	19249.2702612943	2276.90108255192	14786.5441394925	23711.996383096	26861.1817484733	5736.12619906953	15618.374398297	38103.9890986496	46110.4520097676	6281.73210419749	33798.2570855405	58422.6469339947	0.593344329696074	0.00461018876513331	0.584308359716413	0.602380299675736
20	PreTest, EntryTest, ExitTest, TestEvery3Days, PCR 1D	2	6244.50348515671	766.98836954507	4741.20628084838	7747.80068946505	12692.6180447924	2494.55253516873	7803.29507586165	17581.9410137231	18937.1215299491	2730.99619932504	13584.368979272	24289.8740806262	0.256187870595139	0.00416044368093342	0.248033400980509	0.264342340209768
20	PreTest, EntryTest, ExitTest, TestEvery3Days, PCR 1D	3	2258.24094547327	297.199301506422	1675.73031452068	2840.75157642585	8399.30971709678	1520.09335223019	5419.92674672561	11378.692687468	10657.5506625701	1633.11343203882	7456.64833577396	13858.4529893661	0.153020167352725	0.00345875801284231	0.146241001647554	0.159799333057896
20	PreTest, EntryTest, ExitTest, TestEvery3Days, PCR 1D	4	672.083563461313	101.161469694526	473.807082860041	870.360044062585	5563.50983644583	985.60882065068	3631.7165479705	7495.30312492116	6235.59339990714	1027.18609967918	4222.30864453596	8248.87815527833	0.0949200759721318	0.00270010136796097	0.0896278772909284	0.100212274653335
20	PreTest, EntryTest, ExitTest, TestEvery3Days, PCR 1D	5	99.3782351343567	25.083554265025	50.2144687749077	148.542001493806	3003.94774669608	539.59508739537	1946.34137540116	4061.55411799101	3103.32598183044	546.797279934708	2031.60331315841	4175.04865050247	0.0502247684375619	0.0020476940315001	0.0462112881358217	0.0542382487393021
20	PreTest, EntryTest, ExitTest, TestEvery3Days, PCR 1D	6	34.4182453147037	13.1323826263605	8.67877536703709	60.1577152623703	1961.33220012958	371.435371149381	1233.31887267679	2689.34552758236	1995.75044544428	374.783813607516	1261.17417077355	2730.32672011501	0.0337620853067677	0.00164433919350102	0.0305391804875057	0.0369849901260297
20	PreTest, EntryTest, ExitTest, TestEvery3Days, PCR 1D	7	11.8703169288735	7.57458329377569	-2.97586632692681	26.7165001846739	1300.34065248814	255.451115845091	799.656465431765	1801.02483954452	1312.21096941702	256.45485390831	809.559455756729	1814.8624830773	0.0232407157146438	0.00139664527323623	0.0205032909791008	0.0259781404501868
20	PreTest, EntryTest, ExitTest, TestEvery3Days, PCR 1D	8	1.76527561124996	2.74971068744249	-3.62415733613731	7.15470855863724	681.354079776891	145.923307164217	395.344397735026	967.363761818756	683.119355388141	146.044662484056	396.871816919391	969.36689385689	0.012753814807162	0.00105748475093502	0.0106811446953293	0.0148264849189946
20	PreTest, EntryTest, ExitTest, TestEvery3Days, PCR 1D	9	0.724742096552173	1.71651969154488	-2.6396364988758	4.08912069198014	432.254252457601	102.8324063117	230.702736086668	633.805768828533	432.978994554153	102.996595263862	231.105667836984	634.852321271321	0.00846127642001745	0.000882318705669487	0.00673193175690525	0.0101906210831296
20	PreTest, EntryTest, ExitTest, TestEvery3Days, PCR 1D	10	0.324832862984816	1.16015985406562	-1.9490804509838	2.59874617695343	275.746032815877	69.9154393738026	138.711771643224	412.78029398853	276.070865678862	69.9280174919734	139.011951394594	413.12977996313	0.00565997690547007	0.000677920282829891	0.00433125315112348	0.00698870065981665
20	PreTest, EntryTest, ExitTest, TestEvery3Days, PCR 1D	11	0.0623737396516943	0.495809173388984	-0.909412240190714	1.0341597194941	144.08259621914	43.3894108756052	59.0393509029534	229.125841535326	144.144969958791	43.3849105143523	59.1105453506609	229.179394566922	0.0031266648585606	0.000528842730538807	0.00209013310670453	0.00416319661041666
20	PreTest, EntryTest, ExitTest, TestEvery3Days, PCR 1D	12	0.0355638272613279	0.379684084265343	-0.708616977898745	0.779744632421401	87.8250102785304	28.1007037015878	32.7476310234183	142.902389533643	87.8605741057917	28.1173255309598	32.7506160651105	142.970532146473	0.00201385909028565	0.000405855079493637	0.00121838313447812	0.00280933504609318
20	PreTest, EntryTest, ExitTest, TestEvery3Days, PCR 1D	13	0.0101407399723834	0.19089166397408	-0.364006921416814	0.384288401361581	53.4846685817108	20.5187848394475	13.2678502963938	93.7014868670278	53.4948093216832	20.5174121197308	13.2806815670109	93.7089370763554	0.00129346395305602	0.00033230511052218	0.000642145936432553	0.0019447819696795
20	PreTest, EntryTest, ExitTest, TestEvery3Days, PCR 1D	14	0.00258629306287629	0.0817857677538215	-0.157713811734614	0.162886397860366	27.9637757823461	13.0761802659042	2.33446246117397	53.5930891035183	27.966362075409	13.0746733884643	2.3400022340189	53.5927219167991	0.000720099813286162	0.000245482016499879	0.000238955060946398	0.00120124456562592
20	PreTest, EntryTest, ExitTest, TestEvery3Days, PCR 1D	15	0	0	0	0	16.6039229353302	9.27857574376337	-1.58208552244598	34.7899313931064	16.6039229353302	9.27857574376337	-1.58208552244598	34.7899313931064	0.000456104516239309	0.000191826604150679	8.0124372103978e-05	0.00083208466037464
20	PreTest, EntryTest, ExitTest, TestEvery3Days, PCR 1D	16	0.00209820226669395	0.0663509815448092	-0.127949721561132	0.13214612609452	10.0989072881677	6.97825093969913	-3.57846455364265	23.776279129978	10.1010054904343	6.97674461798729	-3.57341396082074	23.7754249416894	0.000296382260862279	0.000160194182728319	-1.7598337285226e-05	0.000610362859009785
20	PreTest, EntryTest, ExitTest, TestEvery3Days, PCR 1D	17	0	0	0	0	5.12006666590185	4.54288064643895	-3.78397940111849	14.0241127329222	5.12006666590185	4.54288064643895	-3.78397940111849	14.0241127329222	0.000163795720295148	0.000119650676596927	-7.07196058348278e-05	0.000398311046425125
20	PreTest, EntryTest, ExitTest, TestEvery3Days, PCR 1D	18	0	0	0	0	3.06282168358066	3.36795151480942	-3.53836328544581	9.66400665260713	3.06282168358066	3.36795151480942	-3.53836328544581	9.66400665260713	0.000105931415324226	9.46400879966204e-05	-7.95631571491499e-05	0.000291425987797602
20	PreTest, EntryTest, ExitTest, TestEvery3Days, PCR 1D	19	0	0	0	0	1.75098824677829	2.49647056245266	-3.14209405562893	6.6440705491855	1.75098824677829	2.49647056245266	-3.14209405562893	6.6440705491855	6.57916195421787e-05	7.49913436196653e-05	-8.11914139523653e-05	0.000212774653036723
20	PreTest, EntryTest, ExitTest, TestEvery3Days, PCR 1D	20	0	0	0	0	0.88423970610182	1.58934116413066	-2.23086897559428	3.99934838779792	0.88423970610182	1.58934116413066	-2.23086897559428	3.99934838779792	3.648800855272e-05	5.6331295763132e-05	-7.39213311430187e-05	0.000146897348248459
20	PreTest, EntryTest, ExitTest, TestEvery3Days, PCR 1D	21	0	0	0	0	0.550781784179245	1.28651238152517	-1.97078248361009	3.07234605196858	0.550781784179245	1.28651238152517	-1.97078248361009	3.07234605196858	2.41825431668253e-05	4.61467064323196e-05	-6.6265001440521e-05	0.000114630087774172
21	PreTest, EntryTest, ExitTest, TestEvery3Days, PCR 2D	0	29769.9954157289	3484.93765135354	22939.517619076	36600.4732123819	36787.9711609301	7965.66808402419	21175.2617162427	52400.6806056175	66557.966576659	8728.31323337059	49450.4726392527	83665.4605140654	0.825292078462906	0.00348632382690093	0.81845888376218	0.832125273163632
21	PreTest, EntryTest, ExitTest, TestEvery3Days, PCR 2D	1	20300.8040795103	2403.60470822531	15589.7388513887	25011.8693076319	27984.5455652824	5998.93925798422	16226.6246196333	39742.4665109315	48285.3496447928	6569.52611493073	35409.0784595285	61161.620830057	0.620952009633073	0.00452148665479008	0.612089895789685	0.629814123476462
21	PreTest, EntryTest, ExitTest, TestEvery3Days, PCR 2D	2	11041.748730346	1344.71581830913	8406.10572646009	13677.3917342319	20169.1033457108	4049.36512649474	12232.3476977811	28105.8589936404	31210.8520760568	4450.01438901106	22488.8238735951	39932.8802785184	0.420429248254623	0.00472623718860651	0.411165823364955	0.429692673144292
21	PreTest, EntryTest, ExitTest, TestEvery3Days, PCR 2D	3	3236.70575601916	414.732251716261	2423.83054265529	4049.58096938304	9381.70470873587	1745.64222034656	5960.24595685661	12803.1634606151	12618.410464755	1900.63034246644	8893.1749935208	16343.6459359893	0.179504941665116	0.00366517859725998	0.172321191614487	0.186688691715746
21	PreTest, EntryTest, ExitTest, TestEvery3Days, PCR 2D	4	1023.92804832142	148.980186336498	731.92688310188	1315.92921354095	5978.19232733137	1066.53100048463	3887.79156638149	8068.59308828124	7002.12037565278	1132.83093978624	4781.77173367176	9222.4690176338	0.105595824428284	0.00281545721969032	0.100077528277691	0.111114120578877
21	PreTest, EntryTest, ExitTest, TestEvery3Days, PCR 2D	5	293.207781595073	52.1530637825068	190.98777658136	395.427786608786	4003.08661428918	715.219249713095	2601.25688485152	5404.91634372685	4296.29439588426	737.714798764593	2850.37339030565	5742.21540146286	0.0685499450454531	0.00221725665747303	0.064204121996806	0.0728957680941002
21	PreTest, EntryTest, ExitTest, TestEvery3Days, PCR 2D	6	47.1711526687089	14.9279755282033	17.9123206334304	76.4299847039874	1954.18642235958	360.565918226402	1247.47722263583	2660.89562208332	2001.35757502828	364.515384828664	1286.9074207641	2715.80772929247	0.0337143298893373	0.00165635989437544	0.0304678644963615	0.0369607952823132
21	PreTest, EntryTest, ExitTest, TestEvery3Days, PCR 2D	7	16.2051084785982	8.41655169594788	-0.291332845459664	32.701549802656	1280.59839246633	248.716979497921	793.113112650404	1768.08367228225	1296.80350094493	250.245984315011	806.321371687506	1787.28563020235	0.0228849974197715	0.00131878891570495	0.0203001711449898	0.0254698236945532
21	PreTest, EntryTest, ExitTest, TestEvery3Days, PCR 2D	8	5.51495540770938	4.9631557799103	-4.2128299209148	15.2427407363336	842.281372787883	174.26714134	500.717775761483	1183.84496981428	847.796328195592	174.937277745904	504.919263813621	1190.67339257756	0.0156799279151595	0.00115942232307008	0.0134074601619422	0.0179523956683769
21	PreTest, EntryTest, ExitTest, TestEvery3Days, PCR 2D	9	0.864815444265256	1.97379739463305	-3.00382744921551	4.73345833774603	422.184011507907	96.9095688796871	232.241256503721	612.126766512094	423.048826952173	96.9484153059766	233.029932952459	613.067720951887	0.00826222197845015	0.000799878180902776	0.00669446074388071	0.00982998321301959
21	PreTest, EntryTest, ExitTest, TestEvery3Days, PCR 2D	10	0.363154193432734	1.24541450879625	-2.07785824380791	2.80416663067338	268.681129297858	68.5412361346891	134.340306473867	403.021952121849	269.044283491291	68.568247319861	134.650518744363	403.438048238218	0.00551390541938715	0.000696466229864867	0.00414883160885201	0.00687897922992229
21	PreTest, EntryTest, ExitTest, TestEvery3Days, PCR 2D	11	0.190384756945673	0.933958228085434	-1.64017337010178	2.02094288399312	171.883134951825	48.8507398206438	76.1356849033635	267.630585000287	172.073519708771	48.9163862934858	76.1974025735389	267.949636844003	0.00371047548011371	0.000577660834645312	0.0025782602442089	0.00484269071601853
21	PreTest, EntryTest, ExitTest, TestEvery3Days, PCR 2D	12	0.0508561191129946	0.4719569589402	-0.874179520409797	0.975891758635787	85.8803334985552	27.7655247384587	31.4599050111761	140.300761985934	85.9311896176682	27.8054455979509	31.4325162456845	140.429862989652	0.00197058625914292	0.000411806253153751	0.00116344600296157	0.00277772651532427
21	PreTest, EntryTest, ExitTest, TestEvery3Days, PCR 2D	13	0.012661214028685	0.2045172117514	-0.38819252100406	0.41351494906143	52.6880537634714	20.2842973666571	12.9308309248235	92.4452766021192	52.7007149775001	20.2752358154387	12.9612527792403	92.4401771757598	0.00127363728774999	0.000324299329779017	0.000638010601383113	0.00190926397411686
21	PreTest, EntryTest, ExitTest, TestEvery3Days, PCR 2D	14	0.00439143723834382	0.138869438748462	-0.267792662708641	0.276575537185329	32.4102575972649	14.3051567054368	4.3721504546088	60.4483647399211	32.4146490345033	14.3037158126488	4.37936604171154	60.449932027295	0.000830631632793263	0.000270549373794528	0.000300354860155988	0.00136090840543054
21	PreTest, EntryTest, ExitTest, TestEvery3Days, PCR 2D	15	0	0	0	0	16.2918740934881	9.31104347793064	-1.95777112325595	34.5415193102322	16.2918740934881	9.31104347793064	-1.95777112325595	34.5415193102322	0.000446392340141589	0.000200761197694368	5.29003926606288e-05	0.00083988428762255
21	PreTest, EntryTest, ExitTest, TestEvery3Days, PCR 2D	16	0	0	0	0	9.74238370947028	6.40712497342065	-2.81558123843419	22.3003486573748	9.74238370947028	6.40712497342065	-2.81558123843419	22.3003486573748	0.000286899077546716	0.000156939850639648	-2.07030297069945e-05	0.000594501184800426
21	PreTest, EntryTest, ExitTest, TestEvery3Days, PCR 2D	17	0	0	0	0	6.03051268747337	5.14804491570417	-4.05965534730681	16.1206807222535	6.03051268747337	5.14804491570417	-4.05965534730681	16.1206807222535	0.000187870443288951	0.000129674302652283	-6.62911899095236e-05	0.000442032076487426
21	PreTest, EntryTest, ExitTest, TestEvery3Days, PCR 2D	18	0	0	0	0	3.03076404341693	3.27354369246031	-3.38538159380527	9.44690968063913	3.03076404341693	3.27354369246031	-3.38538159380527	9.44690968063913	0.00010343270174335	9.18386765290577e-05	-7.65711042536032e-05	0.000283436507740303
21	PreTest, EntryTest, ExitTest, TestEvery3Days, PCR 2D	19	0	0	0	0	1.76653288302659	2.3955557295597	-2.92875634691041	6.4618221129636	1.76653288302659	2.3955557295597	-2.92875634691041	6.4618221129636	6.54138005418887e-05	7.34056195944589e-05	-7.84612138632507e-05	0.000209288814947028
21	PreTest, EntryTest, ExitTest, TestEvery3Days, PCR 2D	20	0	0	0	0	1.16960039309625	1.79071230686587	-2.34019572836085	4.67939651455334	1.16960039309625	1.79071230686587	-2.34019572836085	4.67939651455334	4.63418635091107e-05	6.21799787198918e-05	-7.55308947818772e-05	0.000168214621800099
21	PreTest, EntryTest, ExitTest, TestEvery3Days, PCR 2D	21	0	0	0	0	0.572259694140391	1.23591673940422	-1.85013711509188	2.99465650337266	0.572259694140391	1.23591673940422	-1.85013711509188	2.99465650337266	2.50368600362302e-05	4.58432885293855e-05	-6.48159854813654e-05	0.000114889705553826
