# Supplementary material for: Border Control for Infectious Respiratory Disease Pandemics: A Modelling Study for H1N1 and Four Strains of SARS-CoV-2
Source: Viruses. 2023 Apr 16;15(4):978. doi: 10.3390/v15040978 (PMC10144227; doi:10.3390/v15040978)
Supplement: Supplementary file 1 [file viruses-15-00978-s001.zip › Table S2.1 - Min Quarantine Lengths.csv]

Disease	StrategyNo	StrategyDescription	Threshold	EarliestDay
A_H1N1	1	Quarantine Only	-6	22
A_H1N1	1	Quarantine Only	-5	22
A_H1N1	1	Quarantine Only	-4	22
A_H1N1	1	Quarantine Only	-3	17
A_H1N1	1	Quarantine Only	-2	11
A_H1N1	2	Pre-Test, Entry Test, PCR 0D	-6	22
A_H1N1	2	Pre-Test, Entry Test, PCR 0D	-5	22
A_H1N1	2	Pre-Test, Entry Test, PCR 0D	-4	22
A_H1N1	2	Pre-Test, Entry Test, PCR 0D	-3	16
A_H1N1	2	Pre-Test, Entry Test, PCR 0D	-2	11
A_H1N1	3	Pre-Test, Entry Test, Antigen	-6	22
A_H1N1	3	Pre-Test, Entry Test, Antigen	-5	22
A_H1N1	3	Pre-Test, Entry Test, Antigen	-4	22
A_H1N1	3	Pre-Test, Entry Test, Antigen	-3	17
A_H1N1	3	Pre-Test, Entry Test, Antigen	-2	11
A_H1N1	4	Pre-Test, Entry Test, PCR 1D	-6	22
A_H1N1	4	Pre-Test, Entry Test, PCR 1D	-5	22
A_H1N1	4	Pre-Test, Entry Test, PCR 1D	-4	22
A_H1N1	4	Pre-Test, Entry Test, PCR 1D	-3	16
A_H1N1	4	Pre-Test, Entry Test, PCR 1D	-2	11
A_H1N1	5	Pre-Test, Entry Test, PCR 2D	-6	22
A_H1N1	5	Pre-Test, Entry Test, PCR 2D	-5	22
A_H1N1	5	Pre-Test, Entry Test, PCR 2D	-4	22
A_H1N1	5	Pre-Test, Entry Test, PCR 2D	-3	16
A_H1N1	5	Pre-Test, Entry Test, PCR 2D	-2	11
A_H1N1	6	Pre-Test, Entry Test, Exit Test, PCR 0D	-6	22
A_H1N1	6	Pre-Test, Entry Test, Exit Test, PCR 0D	-5	22
A_H1N1	6	Pre-Test, Entry Test, Exit Test, PCR 0D	-4	21
A_H1N1	6	Pre-Test, Entry Test, Exit Test, PCR 0D	-3	16
A_H1N1	6	Pre-Test, Entry Test, Exit Test, PCR 0D	-2	10
A_H1N1	7	Pre-Test, Entry Test, Exit Test, Antigen	-6	22
A_H1N1	7	Pre-Test, Entry Test, Exit Test, Antigen	-5	22
A_H1N1	7	Pre-Test, Entry Test, Exit Test, Antigen	-4	22
A_H1N1	7	Pre-Test, Entry Test, Exit Test, Antigen	-3	17
A_H1N1	7	Pre-Test, Entry Test, Exit Test, Antigen	-2	11
A_H1N1	8	Pre-Test, Entry Test, Exit Test, PCR 1D	-6	22
A_H1N1	8	Pre-Test, Entry Test, Exit Test, PCR 1D	-5	22
A_H1N1	8	Pre-Test, Entry Test, Exit Test, PCR 1D	-4	21
A_H1N1	8	Pre-Test, Entry Test, Exit Test, PCR 1D	-3	16
A_H1N1	8	Pre-Test, Entry Test, Exit Test, PCR 1D	-2	10
A_H1N1	9	Pre-Test, Entry Test, Exit Test, PCR 2D	-6	22
A_H1N1	9	Pre-Test, Entry Test, Exit Test, PCR 2D	-5	22
A_H1N1	9	Pre-Test, Entry Test, Exit Test, PCR 2D	-4	21
A_H1N1	9	Pre-Test, Entry Test, Exit Test, PCR 2D	-3	16
A_H1N1	9	Pre-Test, Entry Test, Exit Test, PCR 2D	-2	10
A_H1N1	10	Pre-Test, Entry Test, Exit Test, Test Every Day, PCR 0D	-6	18
A_H1N1	10	Pre-Test, Entry Test, Exit Test, Test Every Day, PCR 0D	-5	16
A_H1N1	10	Pre-Test, Entry Test, Exit Test, Test Every Day, PCR 0D	-4	13
A_H1N1	10	Pre-Test, Entry Test, Exit Test, Test Every Day, PCR 0D	-3	10
A_H1N1	10	Pre-Test, Entry Test, Exit Test, Test Every Day, PCR 0D	-2	7
A_H1N1	11	Pre-Test, Entry Test, Exit Test, Test Every Day, Antigen	-6	22
A_H1N1	11	Pre-Test, Entry Test, Exit Test, Test Every Day, Antigen	-5	22
A_H1N1	11	Pre-Test, Entry Test, Exit Test, Test Every Day, Antigen	-4	20
A_H1N1	11	Pre-Test, Entry Test, Exit Test, Test Every Day, Antigen	-3	15
A_H1N1	11	Pre-Test, Entry Test, Exit Test, Test Every Day, Antigen	-2	10
A_H1N1	12	Pre-Test, Entry Test, Exit Test, Test Every Day, PCR 1D	-6	19
A_H1N1	12	Pre-Test, Entry Test, Exit Test, Test Every Day, PCR 1D	-5	16
A_H1N1	12	Pre-Test, Entry Test, Exit Test, Test Every Day, PCR 1D	-4	13
A_H1N1	12	Pre-Test, Entry Test, Exit Test, Test Every Day, PCR 1D	-3	10
A_H1N1	12	Pre-Test, Entry Test, Exit Test, Test Every Day, PCR 1D	-2	7
A_H1N1	13	Pre-Test, Entry Test, Exit Test, Test Every Day, PCR 2D	-6	19
A_H1N1	13	Pre-Test, Entry Test, Exit Test, Test Every Day, PCR 2D	-5	16
A_H1N1	13	Pre-Test, Entry Test, Exit Test, Test Every Day, PCR 2D	-4	13
A_H1N1	13	Pre-Test, Entry Test, Exit Test, Test Every Day, PCR 2D	-3	10
A_H1N1	13	Pre-Test, Entry Test, Exit Test, Test Every Day, PCR 2D	-2	7
A_H1N1	14	Pre-Test, Entry Test, Exit Test, Test Every 2 Days, PCR 0D	-6	22
A_H1N1	14	Pre-Test, Entry Test, Exit Test, Test Every 2 Days, PCR 0D	-5	19
A_H1N1	14	Pre-Test, Entry Test, Exit Test, Test Every 2 Days, PCR 0D	-4	15
A_H1N1	14	Pre-Test, Entry Test, Exit Test, Test Every 2 Days, PCR 0D	-3	12
A_H1N1	14	Pre-Test, Entry Test, Exit Test, Test Every 2 Days, PCR 0D	-2	8
A_H1N1	15	Pre-Test, Entry Test, Exit Test, Test Every 2 Days, Antigen	-6	22
A_H1N1	15	Pre-Test, Entry Test, Exit Test, Test Every 2 Days, Antigen	-5	22
A_H1N1	15	Pre-Test, Entry Test, Exit Test, Test Every 2 Days, Antigen	-4	21
A_H1N1	15	Pre-Test, Entry Test, Exit Test, Test Every 2 Days, Antigen	-3	16
A_H1N1	15	Pre-Test, Entry Test, Exit Test, Test Every 2 Days, Antigen	-2	11
A_H1N1	16	Pre-Test, Entry Test, Exit Test, Test Every 2 Days, PCR 1D	-6	22
A_H1N1	16	Pre-Test, Entry Test, Exit Test, Test Every 2 Days, PCR 1D	-5	19
A_H1N1	16	Pre-Test, Entry Test, Exit Test, Test Every 2 Days, PCR 1D	-4	16
A_H1N1	16	Pre-Test, Entry Test, Exit Test, Test Every 2 Days, PCR 1D	-3	12
A_H1N1	16	Pre-Test, Entry Test, Exit Test, Test Every 2 Days, PCR 1D	-2	8
A_H1N1	17	Pre-Test, Entry Test, Exit Test, Test Every 2 Days, PCR 2D	-6	22
A_H1N1	17	Pre-Test, Entry Test, Exit Test, Test Every 2 Days, PCR 2D	-5	19
A_H1N1	17	Pre-Test, Entry Test, Exit Test, Test Every 2 Days, PCR 2D	-4	16
A_H1N1	17	Pre-Test, Entry Test, Exit Test, Test Every 2 Days, PCR 2D	-3	12
A_H1N1	17	Pre-Test, Entry Test, Exit Test, Test Every 2 Days, PCR 2D	-2	8
A_H1N1	18	Pre-Test, Entry Test, Exit Test, Test Every 3 Days, PCR 0D	-6	22
A_H1N1	18	Pre-Test, Entry Test, Exit Test, Test Every 3 Days, PCR 0D	-5	21
A_H1N1	18	Pre-Test, Entry Test, Exit Test, Test Every 3 Days, PCR 0D	-4	17
A_H1N1	18	Pre-Test, Entry Test, Exit Test, Test Every 3 Days, PCR 0D	-3	13
A_H1N1	18	Pre-Test, Entry Test, Exit Test, Test Every 3 Days, PCR 0D	-2	8
A_H1N1	19	Pre-Test, Entry Test, Exit Test, Test Every 3 Days, Antigen	-6	22
A_H1N1	19	Pre-Test, Entry Test, Exit Test, Test Every 3 Days, Antigen	-5	22
A_H1N1	19	Pre-Test, Entry Test, Exit Test, Test Every 3 Days, Antigen	-4	21
A_H1N1	19	Pre-Test, Entry Test, Exit Test, Test Every 3 Days, Antigen	-3	16
A_H1N1	19	Pre-Test, Entry Test, Exit Test, Test Every 3 Days, Antigen	-2	11
A_H1N1	20	Pre-Test, Entry Test, Exit Test, Test Every 3 Days, PCR 1D	-6	22
A_H1N1	20	Pre-Test, Entry Test, Exit Test, Test Every 3 Days, PCR 1D	-5	21
A_H1N1	20	Pre-Test, Entry Test, Exit Test, Test Every 3 Days, PCR 1D	-4	17
A_H1N1	20	Pre-Test, Entry Test, Exit Test, Test Every 3 Days, PCR 1D	-3	13
A_H1N1	20	Pre-Test, Entry Test, Exit Test, Test Every 3 Days, PCR 1D	-2	8
A_H1N1	21	Pre-Test, Entry Test, Exit Test, Test Every 3 Days, PCR 2D	-6	22
A_H1N1	21	Pre-Test, Entry Test, Exit Test, Test Every 3 Days, PCR 2D	-5	21
A_H1N1	21	Pre-Test, Entry Test, Exit Test, Test Every 3 Days, PCR 2D	-4	17
A_H1N1	21	Pre-Test, Entry Test, Exit Test, Test Every 3 Days, PCR 2D	-3	13
A_H1N1	21	Pre-Test, Entry Test, Exit Test, Test Every 3 Days, PCR 2D	-2	9
Alpha	1	Quarantine Only	-6	12
Alpha	1	Quarantine Only	-5	10
Alpha	1	Quarantine Only	-4	9
Alpha	1	Quarantine Only	-3	7
Alpha	1	Quarantine Only	-2	6
Alpha	2	Pre-Test, Entry Test, PCR 0D	-6	11
Alpha	2	Pre-Test, Entry Test, PCR 0D	-5	10
Alpha	2	Pre-Test, Entry Test, PCR 0D	-4	9
Alpha	2	Pre-Test, Entry Test, PCR 0D	-3	7
Alpha	2	Pre-Test, Entry Test, PCR 0D	-2	6
Alpha	3	Pre-Test, Entry Test, Antigen	-6	12
Alpha	3	Pre-Test, Entry Test, Antigen	-5	10
Alpha	3	Pre-Test, Entry Test, Antigen	-4	9
Alpha	3	Pre-Test, Entry Test, Antigen	-3	7
Alpha	3	Pre-Test, Entry Test, Antigen	-2	6
Alpha	4	Pre-Test, Entry Test, PCR 1D	-6	12
Alpha	4	Pre-Test, Entry Test, PCR 1D	-5	10
Alpha	4	Pre-Test, Entry Test, PCR 1D	-4	9
Alpha	4	Pre-Test, Entry Test, PCR 1D	-3	7
Alpha	4	Pre-Test, Entry Test, PCR 1D	-2	6
Alpha	5	Pre-Test, Entry Test, PCR 2D	-6	12
Alpha	5	Pre-Test, Entry Test, PCR 2D	-5	10
Alpha	5	Pre-Test, Entry Test, PCR 2D	-4	9
Alpha	5	Pre-Test, Entry Test, PCR 2D	-3	7
Alpha	5	Pre-Test, Entry Test, PCR 2D	-2	6
Alpha	6	Pre-Test, Entry Test, Exit Test, PCR 0D	-6	11
Alpha	6	Pre-Test, Entry Test, Exit Test, PCR 0D	-5	9
Alpha	6	Pre-Test, Entry Test, Exit Test, PCR 0D	-4	7
Alpha	6	Pre-Test, Entry Test, Exit Test, PCR 0D	-3	4
Alpha	6	Pre-Test, Entry Test, Exit Test, PCR 0D	-2	3
Alpha	7	Pre-Test, Entry Test, Exit Test, Antigen	-6	11
Alpha	7	Pre-Test, Entry Test, Exit Test, Antigen	-5	9
Alpha	7	Pre-Test, Entry Test, Exit Test, Antigen	-4	7
Alpha	7	Pre-Test, Entry Test, Exit Test, Antigen	-3	4
Alpha	7	Pre-Test, Entry Test, Exit Test, Antigen	-2	3
Alpha	8	Pre-Test, Entry Test, Exit Test, PCR 1D	-6	10
Alpha	8	Pre-Test, Entry Test, Exit Test, PCR 1D	-5	8
Alpha	8	Pre-Test, Entry Test, Exit Test, PCR 1D	-4	6
Alpha	8	Pre-Test, Entry Test, Exit Test, PCR 1D	-3	5
Alpha	8	Pre-Test, Entry Test, Exit Test, PCR 1D	-2	4
Alpha	9	Pre-Test, Entry Test, Exit Test, PCR 2D	-6	10
Alpha	9	Pre-Test, Entry Test, Exit Test, PCR 2D	-5	8
Alpha	9	Pre-Test, Entry Test, Exit Test, PCR 2D	-4	7
Alpha	9	Pre-Test, Entry Test, Exit Test, PCR 2D	-3	5
Alpha	9	Pre-Test, Entry Test, Exit Test, PCR 2D	-2	4
Alpha	10	Pre-Test, Entry Test, Exit Test, Test Every Day, PCR 0D	-6	4
Alpha	10	Pre-Test, Entry Test, Exit Test, Test Every Day, PCR 0D	-5	4
Alpha	10	Pre-Test, Entry Test, Exit Test, Test Every Day, PCR 0D	-4	3
Alpha	10	Pre-Test, Entry Test, Exit Test, Test Every Day, PCR 0D	-3	3
Alpha	10	Pre-Test, Entry Test, Exit Test, Test Every Day, PCR 0D	-2	2
Alpha	11	Pre-Test, Entry Test, Exit Test, Test Every Day, Antigen	-6	5
Alpha	11	Pre-Test, Entry Test, Exit Test, Test Every Day, Antigen	-5	4
Alpha	11	Pre-Test, Entry Test, Exit Test, Test Every Day, Antigen	-4	4
Alpha	11	Pre-Test, Entry Test, Exit Test, Test Every Day, Antigen	-3	3
Alpha	11	Pre-Test, Entry Test, Exit Test, Test Every Day, Antigen	-2	2
Alpha	12	Pre-Test, Entry Test, Exit Test, Test Every Day, PCR 1D	-6	5
Alpha	12	Pre-Test, Entry Test, Exit Test, Test Every Day, PCR 1D	-5	5
Alpha	12	Pre-Test, Entry Test, Exit Test, Test Every Day, PCR 1D	-4	4
Alpha	12	Pre-Test, Entry Test, Exit Test, Test Every Day, PCR 1D	-3	4
Alpha	12	Pre-Test, Entry Test, Exit Test, Test Every Day, PCR 1D	-2	3
Alpha	13	Pre-Test, Entry Test, Exit Test, Test Every Day, PCR 2D	-6	6
Alpha	13	Pre-Test, Entry Test, Exit Test, Test Every Day, PCR 2D	-5	6
Alpha	13	Pre-Test, Entry Test, Exit Test, Test Every Day, PCR 2D	-4	5
Alpha	13	Pre-Test, Entry Test, Exit Test, Test Every Day, PCR 2D	-3	5
Alpha	13	Pre-Test, Entry Test, Exit Test, Test Every Day, PCR 2D	-2	4
Alpha	14	Pre-Test, Entry Test, Exit Test, Test Every 2 Days, PCR 0D	-6	5
Alpha	14	Pre-Test, Entry Test, Exit Test, Test Every 2 Days, PCR 0D	-5	5
Alpha	14	Pre-Test, Entry Test, Exit Test, Test Every 2 Days, PCR 0D	-4	4
Alpha	14	Pre-Test, Entry Test, Exit Test, Test Every 2 Days, PCR 0D	-3	3
Alpha	14	Pre-Test, Entry Test, Exit Test, Test Every 2 Days, PCR 0D	-2	3
Alpha	15	Pre-Test, Entry Test, Exit Test, Test Every 2 Days, Antigen	-6	5
Alpha	15	Pre-Test, Entry Test, Exit Test, Test Every 2 Days, Antigen	-5	5
Alpha	15	Pre-Test, Entry Test, Exit Test, Test Every 2 Days, Antigen	-4	4
Alpha	15	Pre-Test, Entry Test, Exit Test, Test Every 2 Days, Antigen	-3	3
Alpha	15	Pre-Test, Entry Test, Exit Test, Test Every 2 Days, Antigen	-2	3
Alpha	16	Pre-Test, Entry Test, Exit Test, Test Every 2 Days, PCR 1D	-6	6
Alpha	16	Pre-Test, Entry Test, Exit Test, Test Every 2 Days, PCR 1D	-5	6
Alpha	16	Pre-Test, Entry Test, Exit Test, Test Every 2 Days, PCR 1D	-4	5
Alpha	16	Pre-Test, Entry Test, Exit Test, Test Every 2 Days, PCR 1D	-3	4
Alpha	16	Pre-Test, Entry Test, Exit Test, Test Every 2 Days, PCR 1D	-2	4
Alpha	17	Pre-Test, Entry Test, Exit Test, Test Every 2 Days, PCR 2D	-6	7
Alpha	17	Pre-Test, Entry Test, Exit Test, Test Every 2 Days, PCR 2D	-5	7
Alpha	17	Pre-Test, Entry Test, Exit Test, Test Every 2 Days, PCR 2D	-4	5
Alpha	17	Pre-Test, Entry Test, Exit Test, Test Every 2 Days, PCR 2D	-3	5
Alpha	17	Pre-Test, Entry Test, Exit Test, Test Every 2 Days, PCR 2D	-2	4
Alpha	18	Pre-Test, Entry Test, Exit Test, Test Every 3 Days, PCR 0D	-6	7
Alpha	18	Pre-Test, Entry Test, Exit Test, Test Every 3 Days, PCR 0D	-5	5
Alpha	18	Pre-Test, Entry Test, Exit Test, Test Every 3 Days, PCR 0D	-4	4
Alpha	18	Pre-Test, Entry Test, Exit Test, Test Every 3 Days, PCR 0D	-3	4
Alpha	18	Pre-Test, Entry Test, Exit Test, Test Every 3 Days, PCR 0D	-2	3
Alpha	19	Pre-Test, Entry Test, Exit Test, Test Every 3 Days, Antigen	-6	7
Alpha	19	Pre-Test, Entry Test, Exit Test, Test Every 3 Days, Antigen	-5	5
Alpha	19	Pre-Test, Entry Test, Exit Test, Test Every 3 Days, Antigen	-4	4
Alpha	19	Pre-Test, Entry Test, Exit Test, Test Every 3 Days, Antigen	-3	4
Alpha	19	Pre-Test, Entry Test, Exit Test, Test Every 3 Days, Antigen	-2	3
Alpha	20	Pre-Test, Entry Test, Exit Test, Test Every 3 Days, PCR 1D	-6	7
Alpha	20	Pre-Test, Entry Test, Exit Test, Test Every 3 Days, PCR 1D	-5	5
Alpha	20	Pre-Test, Entry Test, Exit Test, Test Every 3 Days, PCR 1D	-4	5
Alpha	20	Pre-Test, Entry Test, Exit Test, Test Every 3 Days, PCR 1D	-3	5
Alpha	20	Pre-Test, Entry Test, Exit Test, Test Every 3 Days, PCR 1D	-2	4
Alpha	21	Pre-Test, Entry Test, Exit Test, Test Every 3 Days, PCR 2D	-6	8
Alpha	21	Pre-Test, Entry Test, Exit Test, Test Every 3 Days, PCR 2D	-5	6
Alpha	21	Pre-Test, Entry Test, Exit Test, Test Every 3 Days, PCR 2D	-4	6
Alpha	21	Pre-Test, Entry Test, Exit Test, Test Every 3 Days, PCR 2D	-3	5
Alpha	21	Pre-Test, Entry Test, Exit Test, Test Every 3 Days, PCR 2D	-2	4
Delta_Unvac	1	Quarantine Only	-6	14
Delta_Unvac	1	Quarantine Only	-5	12
Delta_Unvac	1	Quarantine Only	-4	10
Delta_Unvac	1	Quarantine Only	-3	8
Delta_Unvac	1	Quarantine Only	-2	6
Delta_Unvac	2	Pre-Test, Entry Test, PCR 0D	-6	13
Delta_Unvac	2	Pre-Test, Entry Test, PCR 0D	-5	11
Delta_Unvac	2	Pre-Test, Entry Test, PCR 0D	-4	10
Delta_Unvac	2	Pre-Test, Entry Test, PCR 0D	-3	8
Delta_Unvac	2	Pre-Test, Entry Test, PCR 0D	-2	6
Delta_Unvac	3	Pre-Test, Entry Test, Antigen	-6	13
Delta_Unvac	3	Pre-Test, Entry Test, Antigen	-5	11
Delta_Unvac	3	Pre-Test, Entry Test, Antigen	-4	10
Delta_Unvac	3	Pre-Test, Entry Test, Antigen	-3	8
Delta_Unvac	3	Pre-Test, Entry Test, Antigen	-2	6
Delta_Unvac	4	Pre-Test, Entry Test, PCR 1D	-6	13
Delta_Unvac	4	Pre-Test, Entry Test, PCR 1D	-5	11
Delta_Unvac	4	Pre-Test, Entry Test, PCR 1D	-4	10
Delta_Unvac	4	Pre-Test, Entry Test, PCR 1D	-3	8
Delta_Unvac	4	Pre-Test, Entry Test, PCR 1D	-2	6
Delta_Unvac	5	Pre-Test, Entry Test, PCR 2D	-6	13
Delta_Unvac	5	Pre-Test, Entry Test, PCR 2D	-5	11
Delta_Unvac	5	Pre-Test, Entry Test, PCR 2D	-4	10
Delta_Unvac	5	Pre-Test, Entry Test, PCR 2D	-3	8
Delta_Unvac	5	Pre-Test, Entry Test, PCR 2D	-2	6
Delta_Unvac	6	Pre-Test, Entry Test, Exit Test, PCR 0D	-6	12
Delta_Unvac	6	Pre-Test, Entry Test, Exit Test, PCR 0D	-5	9
Delta_Unvac	6	Pre-Test, Entry Test, Exit Test, PCR 0D	-4	7
Delta_Unvac	6	Pre-Test, Entry Test, Exit Test, PCR 0D	-3	5
Delta_Unvac	6	Pre-Test, Entry Test, Exit Test, PCR 0D	-2	3
Delta_Unvac	7	Pre-Test, Entry Test, Exit Test, Antigen	-6	12
Delta_Unvac	7	Pre-Test, Entry Test, Exit Test, Antigen	-5	10
Delta_Unvac	7	Pre-Test, Entry Test, Exit Test, Antigen	-4	7
Delta_Unvac	7	Pre-Test, Entry Test, Exit Test, Antigen	-3	5
Delta_Unvac	7	Pre-Test, Entry Test, Exit Test, Antigen	-2	3
Delta_Unvac	8	Pre-Test, Entry Test, Exit Test, PCR 1D	-6	12
Delta_Unvac	8	Pre-Test, Entry Test, Exit Test, PCR 1D	-5	9
Delta_Unvac	8	Pre-Test, Entry Test, Exit Test, PCR 1D	-4	7
Delta_Unvac	8	Pre-Test, Entry Test, Exit Test, PCR 1D	-3	5
Delta_Unvac	8	Pre-Test, Entry Test, Exit Test, PCR 1D	-2	4
Delta_Unvac	9	Pre-Test, Entry Test, Exit Test, PCR 2D	-6	11
Delta_Unvac	9	Pre-Test, Entry Test, Exit Test, PCR 2D	-5	9
Delta_Unvac	9	Pre-Test, Entry Test, Exit Test, PCR 2D	-4	7
Delta_Unvac	9	Pre-Test, Entry Test, Exit Test, PCR 2D	-3	6
Delta_Unvac	9	Pre-Test, Entry Test, Exit Test, PCR 2D	-2	5
Delta_Unvac	10	Pre-Test, Entry Test, Exit Test, Test Every Day, PCR 0D	-6	5
Delta_Unvac	10	Pre-Test, Entry Test, Exit Test, Test Every Day, PCR 0D	-5	4
Delta_Unvac	10	Pre-Test, Entry Test, Exit Test, Test Every Day, PCR 0D	-4	3
Delta_Unvac	10	Pre-Test, Entry Test, Exit Test, Test Every Day, PCR 0D	-3	3
Delta_Unvac	10	Pre-Test, Entry Test, Exit Test, Test Every Day, PCR 0D	-2	2
Delta_Unvac	11	Pre-Test, Entry Test, Exit Test, Test Every Day, Antigen	-6	5
Delta_Unvac	11	Pre-Test, Entry Test, Exit Test, Test Every Day, Antigen	-5	5
Delta_Unvac	11	Pre-Test, Entry Test, Exit Test, Test Every Day, Antigen	-4	4
Delta_Unvac	11	Pre-Test, Entry Test, Exit Test, Test Every Day, Antigen	-3	3
Delta_Unvac	11	Pre-Test, Entry Test, Exit Test, Test Every Day, Antigen	-2	2
Delta_Unvac	12	Pre-Test, Entry Test, Exit Test, Test Every Day, PCR 1D	-6	6
Delta_Unvac	12	Pre-Test, Entry Test, Exit Test, Test Every Day, PCR 1D	-5	5
Delta_Unvac	12	Pre-Test, Entry Test, Exit Test, Test Every Day, PCR 1D	-4	4
Delta_Unvac	12	Pre-Test, Entry Test, Exit Test, Test Every Day, PCR 1D	-3	4
Delta_Unvac	12	Pre-Test, Entry Test, Exit Test, Test Every Day, PCR 1D	-2	3
Delta_Unvac	13	Pre-Test, Entry Test, Exit Test, Test Every Day, PCR 2D	-6	7
Delta_Unvac	13	Pre-Test, Entry Test, Exit Test, Test Every Day, PCR 2D	-5	6
Delta_Unvac	13	Pre-Test, Entry Test, Exit Test, Test Every Day, PCR 2D	-4	5
Delta_Unvac	13	Pre-Test, Entry Test, Exit Test, Test Every Day, PCR 2D	-3	5
Delta_Unvac	13	Pre-Test, Entry Test, Exit Test, Test Every Day, PCR 2D	-2	4
Delta_Unvac	14	Pre-Test, Entry Test, Exit Test, Test Every 2 Days, PCR 0D	-6	5
Delta_Unvac	14	Pre-Test, Entry Test, Exit Test, Test Every 2 Days, PCR 0D	-5	5
Delta_Unvac	14	Pre-Test, Entry Test, Exit Test, Test Every 2 Days, PCR 0D	-4	4
Delta_Unvac	14	Pre-Test, Entry Test, Exit Test, Test Every 2 Days, PCR 0D	-3	3
Delta_Unvac	14	Pre-Test, Entry Test, Exit Test, Test Every 2 Days, PCR 0D	-2	3
Delta_Unvac	15	Pre-Test, Entry Test, Exit Test, Test Every 2 Days, Antigen	-6	6
Delta_Unvac	15	Pre-Test, Entry Test, Exit Test, Test Every 2 Days, Antigen	-5	5
Delta_Unvac	15	Pre-Test, Entry Test, Exit Test, Test Every 2 Days, Antigen	-4	5
Delta_Unvac	15	Pre-Test, Entry Test, Exit Test, Test Every 2 Days, Antigen	-3	3
Delta_Unvac	15	Pre-Test, Entry Test, Exit Test, Test Every 2 Days, Antigen	-2	3
Delta_Unvac	16	Pre-Test, Entry Test, Exit Test, Test Every 2 Days, PCR 1D	-6	6
Delta_Unvac	16	Pre-Test, Entry Test, Exit Test, Test Every 2 Days, PCR 1D	-5	6
Delta_Unvac	16	Pre-Test, Entry Test, Exit Test, Test Every 2 Days, PCR 1D	-4	5
Delta_Unvac	16	Pre-Test, Entry Test, Exit Test, Test Every 2 Days, PCR 1D	-3	4
Delta_Unvac	16	Pre-Test, Entry Test, Exit Test, Test Every 2 Days, PCR 1D	-2	4
Delta_Unvac	17	Pre-Test, Entry Test, Exit Test, Test Every 2 Days, PCR 2D	-6	7
Delta_Unvac	17	Pre-Test, Entry Test, Exit Test, Test Every 2 Days, PCR 2D	-5	7
Delta_Unvac	17	Pre-Test, Entry Test, Exit Test, Test Every 2 Days, PCR 2D	-4	6
Delta_Unvac	17	Pre-Test, Entry Test, Exit Test, Test Every 2 Days, PCR 2D	-3	5
Delta_Unvac	17	Pre-Test, Entry Test, Exit Test, Test Every 2 Days, PCR 2D	-2	5
Delta_Unvac	18	Pre-Test, Entry Test, Exit Test, Test Every 3 Days, PCR 0D	-6	7
Delta_Unvac	18	Pre-Test, Entry Test, Exit Test, Test Every 3 Days, PCR 0D	-5	6
Delta_Unvac	18	Pre-Test, Entry Test, Exit Test, Test Every 3 Days, PCR 0D	-4	4
Delta_Unvac	18	Pre-Test, Entry Test, Exit Test, Test Every 3 Days, PCR 0D	-3	4
Delta_Unvac	18	Pre-Test, Entry Test, Exit Test, Test Every 3 Days, PCR 0D	-2	3
Delta_Unvac	19	Pre-Test, Entry Test, Exit Test, Test Every 3 Days, Antigen	-6	7
Delta_Unvac	19	Pre-Test, Entry Test, Exit Test, Test Every 3 Days, Antigen	-5	6
Delta_Unvac	19	Pre-Test, Entry Test, Exit Test, Test Every 3 Days, Antigen	-4	4
Delta_Unvac	19	Pre-Test, Entry Test, Exit Test, Test Every 3 Days, Antigen	-3	4
Delta_Unvac	19	Pre-Test, Entry Test, Exit Test, Test Every 3 Days, Antigen	-2	3
Delta_Unvac	20	Pre-Test, Entry Test, Exit Test, Test Every 3 Days, PCR 1D	-6	8
Delta_Unvac	20	Pre-Test, Entry Test, Exit Test, Test Every 3 Days, PCR 1D	-5	6
Delta_Unvac	20	Pre-Test, Entry Test, Exit Test, Test Every 3 Days, PCR 1D	-4	5
Delta_Unvac	20	Pre-Test, Entry Test, Exit Test, Test Every 3 Days, PCR 1D	-3	5
Delta_Unvac	20	Pre-Test, Entry Test, Exit Test, Test Every 3 Days, PCR 1D	-2	4
Delta_Unvac	21	Pre-Test, Entry Test, Exit Test, Test Every 3 Days, PCR 2D	-6	9
Delta_Unvac	21	Pre-Test, Entry Test, Exit Test, Test Every 3 Days, PCR 2D	-5	7
Delta_Unvac	21	Pre-Test, Entry Test, Exit Test, Test Every 3 Days, PCR 2D	-4	6
Delta_Unvac	21	Pre-Test, Entry Test, Exit Test, Test Every 3 Days, PCR 2D	-3	6
Delta_Unvac	21	Pre-Test, Entry Test, Exit Test, Test Every 3 Days, PCR 2D	-2	5
Delta_Vac	1	Quarantine Only	-6	12
Delta_Vac	1	Quarantine Only	-5	11
Delta_Vac	1	Quarantine Only	-4	9
Delta_Vac	1	Quarantine Only	-3	8
Delta_Vac	1	Quarantine Only	-2	6
Delta_Vac	2	Pre-Test, Entry Test, PCR 0D	-6	12
Delta_Vac	2	Pre-Test, Entry Test, PCR 0D	-5	11
Delta_Vac	2	Pre-Test, Entry Test, PCR 0D	-4	9
Delta_Vac	2	Pre-Test, Entry Test, PCR 0D	-3	8
Delta_Vac	2	Pre-Test, Entry Test, PCR 0D	-2	6
Delta_Vac	3	Pre-Test, Entry Test, Antigen	-6	12
Delta_Vac	3	Pre-Test, Entry Test, Antigen	-5	11
Delta_Vac	3	Pre-Test, Entry Test, Antigen	-4	9
Delta_Vac	3	Pre-Test, Entry Test, Antigen	-3	8
Delta_Vac	3	Pre-Test, Entry Test, Antigen	-2	6
Delta_Vac	4	Pre-Test, Entry Test, PCR 1D	-6	12
Delta_Vac	4	Pre-Test, Entry Test, PCR 1D	-5	11
Delta_Vac	4	Pre-Test, Entry Test, PCR 1D	-4	9
Delta_Vac	4	Pre-Test, Entry Test, PCR 1D	-3	8
Delta_Vac	4	Pre-Test, Entry Test, PCR 1D	-2	6
Delta_Vac	5	Pre-Test, Entry Test, PCR 2D	-6	12
Delta_Vac	5	Pre-Test, Entry Test, PCR 2D	-5	11
Delta_Vac	5	Pre-Test, Entry Test, PCR 2D	-4	9
Delta_Vac	5	Pre-Test, Entry Test, PCR 2D	-3	8
Delta_Vac	5	Pre-Test, Entry Test, PCR 2D	-2	6
Delta_Vac	6	Pre-Test, Entry Test, Exit Test, PCR 0D	-6	10
Delta_Vac	6	Pre-Test, Entry Test, Exit Test, PCR 0D	-5	9
Delta_Vac	6	Pre-Test, Entry Test, Exit Test, PCR 0D	-4	7
Delta_Vac	6	Pre-Test, Entry Test, Exit Test, PCR 0D	-3	5
Delta_Vac	6	Pre-Test, Entry Test, Exit Test, PCR 0D	-2	3
Delta_Vac	7	Pre-Test, Entry Test, Exit Test, Antigen	-6	11
Delta_Vac	7	Pre-Test, Entry Test, Exit Test, Antigen	-5	9
Delta_Vac	7	Pre-Test, Entry Test, Exit Test, Antigen	-4	7
Delta_Vac	7	Pre-Test, Entry Test, Exit Test, Antigen	-3	5
Delta_Vac	7	Pre-Test, Entry Test, Exit Test, Antigen	-2	3
Delta_Vac	8	Pre-Test, Entry Test, Exit Test, PCR 1D	-6	10
Delta_Vac	8	Pre-Test, Entry Test, Exit Test, PCR 1D	-5	8
Delta_Vac	8	Pre-Test, Entry Test, Exit Test, PCR 1D	-4	7
Delta_Vac	8	Pre-Test, Entry Test, Exit Test, PCR 1D	-3	5
Delta_Vac	8	Pre-Test, Entry Test, Exit Test, PCR 1D	-2	4
Delta_Vac	9	Pre-Test, Entry Test, Exit Test, PCR 2D	-6	10
Delta_Vac	9	Pre-Test, Entry Test, Exit Test, PCR 2D	-5	8
Delta_Vac	9	Pre-Test, Entry Test, Exit Test, PCR 2D	-4	7
Delta_Vac	9	Pre-Test, Entry Test, Exit Test, PCR 2D	-3	6
Delta_Vac	9	Pre-Test, Entry Test, Exit Test, PCR 2D	-2	5
Delta_Vac	10	Pre-Test, Entry Test, Exit Test, Test Every Day, PCR 0D	-6	5
Delta_Vac	10	Pre-Test, Entry Test, Exit Test, Test Every Day, PCR 0D	-5	4
Delta_Vac	10	Pre-Test, Entry Test, Exit Test, Test Every Day, PCR 0D	-4	4
Delta_Vac	10	Pre-Test, Entry Test, Exit Test, Test Every Day, PCR 0D	-3	3
Delta_Vac	10	Pre-Test, Entry Test, Exit Test, Test Every Day, PCR 0D	-2	2
Delta_Vac	11	Pre-Test, Entry Test, Exit Test, Test Every Day, Antigen	-6	5
Delta_Vac	11	Pre-Test, Entry Test, Exit Test, Test Every Day, Antigen	-5	4
Delta_Vac	11	Pre-Test, Entry Test, Exit Test, Test Every Day, Antigen	-4	4
Delta_Vac	11	Pre-Test, Entry Test, Exit Test, Test Every Day, Antigen	-3	3
Delta_Vac	11	Pre-Test, Entry Test, Exit Test, Test Every Day, Antigen	-2	2
Delta_Vac	12	Pre-Test, Entry Test, Exit Test, Test Every Day, PCR 1D	-6	6
Delta_Vac	12	Pre-Test, Entry Test, Exit Test, Test Every Day, PCR 1D	-5	5
Delta_Vac	12	Pre-Test, Entry Test, Exit Test, Test Every Day, PCR 1D	-4	5
Delta_Vac	12	Pre-Test, Entry Test, Exit Test, Test Every Day, PCR 1D	-3	4
Delta_Vac	12	Pre-Test, Entry Test, Exit Test, Test Every Day, PCR 1D	-2	3
Delta_Vac	13	Pre-Test, Entry Test, Exit Test, Test Every Day, PCR 2D	-6	7
Delta_Vac	13	Pre-Test, Entry Test, Exit Test, Test Every Day, PCR 2D	-5	6
Delta_Vac	13	Pre-Test, Entry Test, Exit Test, Test Every Day, PCR 2D	-4	5
Delta_Vac	13	Pre-Test, Entry Test, Exit Test, Test Every Day, PCR 2D	-3	5
Delta_Vac	13	Pre-Test, Entry Test, Exit Test, Test Every Day, PCR 2D	-2	4
Delta_Vac	14	Pre-Test, Entry Test, Exit Test, Test Every 2 Days, PCR 0D	-6	5
Delta_Vac	14	Pre-Test, Entry Test, Exit Test, Test Every 2 Days, PCR 0D	-5	5
Delta_Vac	14	Pre-Test, Entry Test, Exit Test, Test Every 2 Days, PCR 0D	-4	4
Delta_Vac	14	Pre-Test, Entry Test, Exit Test, Test Every 2 Days, PCR 0D	-3	3
Delta_Vac	14	Pre-Test, Entry Test, Exit Test, Test Every 2 Days, PCR 0D	-2	3
Delta_Vac	15	Pre-Test, Entry Test, Exit Test, Test Every 2 Days, Antigen	-6	6
Delta_Vac	15	Pre-Test, Entry Test, Exit Test, Test Every 2 Days, Antigen	-5	5
Delta_Vac	15	Pre-Test, Entry Test, Exit Test, Test Every 2 Days, Antigen	-4	5
Delta_Vac	15	Pre-Test, Entry Test, Exit Test, Test Every 2 Days, Antigen	-3	3
Delta_Vac	15	Pre-Test, Entry Test, Exit Test, Test Every 2 Days, Antigen	-2	3
Delta_Vac	16	Pre-Test, Entry Test, Exit Test, Test Every 2 Days, PCR 1D	-6	6
Delta_Vac	16	Pre-Test, Entry Test, Exit Test, Test Every 2 Days, PCR 1D	-5	6
Delta_Vac	16	Pre-Test, Entry Test, Exit Test, Test Every 2 Days, PCR 1D	-4	5
Delta_Vac	16	Pre-Test, Entry Test, Exit Test, Test Every 2 Days, PCR 1D	-3	4
Delta_Vac	16	Pre-Test, Entry Test, Exit Test, Test Every 2 Days, PCR 1D	-2	4
Delta_Vac	17	Pre-Test, Entry Test, Exit Test, Test Every 2 Days, PCR 2D	-6	7
Delta_Vac	17	Pre-Test, Entry Test, Exit Test, Test Every 2 Days, PCR 2D	-5	7
Delta_Vac	17	Pre-Test, Entry Test, Exit Test, Test Every 2 Days, PCR 2D	-4	6
Delta_Vac	17	Pre-Test, Entry Test, Exit Test, Test Every 2 Days, PCR 2D	-3	5
Delta_Vac	17	Pre-Test, Entry Test, Exit Test, Test Every 2 Days, PCR 2D	-2	5
Delta_Vac	18	Pre-Test, Entry Test, Exit Test, Test Every 3 Days, PCR 0D	-6	7
Delta_Vac	18	Pre-Test, Entry Test, Exit Test, Test Every 3 Days, PCR 0D	-5	6
Delta_Vac	18	Pre-Test, Entry Test, Exit Test, Test Every 3 Days, PCR 0D	-4	4
Delta_Vac	18	Pre-Test, Entry Test, Exit Test, Test Every 3 Days, PCR 0D	-3	4
Delta_Vac	18	Pre-Test, Entry Test, Exit Test, Test Every 3 Days, PCR 0D	-2	3
Delta_Vac	19	Pre-Test, Entry Test, Exit Test, Test Every 3 Days, Antigen	-6	7
Delta_Vac	19	Pre-Test, Entry Test, Exit Test, Test Every 3 Days, Antigen	-5	6
Delta_Vac	19	Pre-Test, Entry Test, Exit Test, Test Every 3 Days, Antigen	-4	4
Delta_Vac	19	Pre-Test, Entry Test, Exit Test, Test Every 3 Days, Antigen	-3	4
Delta_Vac	19	Pre-Test, Entry Test, Exit Test, Test Every 3 Days, Antigen	-2	3
Delta_Vac	20	Pre-Test, Entry Test, Exit Test, Test Every 3 Days, PCR 1D	-6	8
Delta_Vac	20	Pre-Test, Entry Test, Exit Test, Test Every 3 Days, PCR 1D	-5	6
Delta_Vac	20	Pre-Test, Entry Test, Exit Test, Test Every 3 Days, PCR 1D	-4	5
Delta_Vac	20	Pre-Test, Entry Test, Exit Test, Test Every 3 Days, PCR 1D	-3	5
Delta_Vac	20	Pre-Test, Entry Test, Exit Test, Test Every 3 Days, PCR 1D	-2	4
Delta_Vac	21	Pre-Test, Entry Test, Exit Test, Test Every 3 Days, PCR 2D	-6	9
Delta_Vac	21	Pre-Test, Entry Test, Exit Test, Test Every 3 Days, PCR 2D	-5	7
Delta_Vac	21	Pre-Test, Entry Test, Exit Test, Test Every 3 Days, PCR 2D	-4	6
Delta_Vac	21	Pre-Test, Entry Test, Exit Test, Test Every 3 Days, PCR 2D	-3	6
Delta_Vac	21	Pre-Test, Entry Test, Exit Test, Test Every 3 Days, PCR 2D	-2	5
Omicron_Vac	1	Quarantine Only	-6	12
Omicron_Vac	1	Quarantine Only	-5	11
Omicron_Vac	1	Quarantine Only	-4	9
Omicron_Vac	1	Quarantine Only	-3	8
Omicron_Vac	1	Quarantine Only	-2	6
Omicron_Vac	2	Pre-Test, Entry Test, PCR 0D	-6	12
Omicron_Vac	2	Pre-Test, Entry Test, PCR 0D	-5	10
Omicron_Vac	2	Pre-Test, Entry Test, PCR 0D	-4	9
Omicron_Vac	2	Pre-Test, Entry Test, PCR 0D	-3	7
Omicron_Vac	2	Pre-Test, Entry Test, PCR 0D	-2	6
Omicron_Vac	3	Pre-Test, Entry Test, Antigen	-6	12
Omicron_Vac	3	Pre-Test, Entry Test, Antigen	-5	10
Omicron_Vac	3	Pre-Test, Entry Test, Antigen	-4	9
Omicron_Vac	3	Pre-Test, Entry Test, Antigen	-3	8
Omicron_Vac	3	Pre-Test, Entry Test, Antigen	-2	6
Omicron_Vac	4	Pre-Test, Entry Test, PCR 1D	-6	12
Omicron_Vac	4	Pre-Test, Entry Test, PCR 1D	-5	10
Omicron_Vac	4	Pre-Test, Entry Test, PCR 1D	-4	9
Omicron_Vac	4	Pre-Test, Entry Test, PCR 1D	-3	8
Omicron_Vac	4	Pre-Test, Entry Test, PCR 1D	-2	6
Omicron_Vac	5	Pre-Test, Entry Test, PCR 2D	-6	12
Omicron_Vac	5	Pre-Test, Entry Test, PCR 2D	-5	11
Omicron_Vac	5	Pre-Test, Entry Test, PCR 2D	-4	9
Omicron_Vac	5	Pre-Test, Entry Test, PCR 2D	-3	8
Omicron_Vac	5	Pre-Test, Entry Test, PCR 2D	-2	6
Omicron_Vac	6	Pre-Test, Entry Test, Exit Test, PCR 0D	-6	10
Omicron_Vac	6	Pre-Test, Entry Test, Exit Test, PCR 0D	-5	9
Omicron_Vac	6	Pre-Test, Entry Test, Exit Test, PCR 0D	-4	7
Omicron_Vac	6	Pre-Test, Entry Test, Exit Test, PCR 0D	-3	5
Omicron_Vac	6	Pre-Test, Entry Test, Exit Test, PCR 0D	-2	3
Omicron_Vac	7	Pre-Test, Entry Test, Exit Test, Antigen	-6	11
Omicron_Vac	7	Pre-Test, Entry Test, Exit Test, Antigen	-5	9
Omicron_Vac	7	Pre-Test, Entry Test, Exit Test, Antigen	-4	7
Omicron_Vac	7	Pre-Test, Entry Test, Exit Test, Antigen	-3	5
Omicron_Vac	7	Pre-Test, Entry Test, Exit Test, Antigen	-2	4
Omicron_Vac	8	Pre-Test, Entry Test, Exit Test, PCR 1D	-6	10
Omicron_Vac	8	Pre-Test, Entry Test, Exit Test, PCR 1D	-5	9
Omicron_Vac	8	Pre-Test, Entry Test, Exit Test, PCR 1D	-4	7
Omicron_Vac	8	Pre-Test, Entry Test, Exit Test, PCR 1D	-3	6
Omicron_Vac	8	Pre-Test, Entry Test, Exit Test, PCR 1D	-2	4
Omicron_Vac	9	Pre-Test, Entry Test, Exit Test, PCR 2D	-6	10
Omicron_Vac	9	Pre-Test, Entry Test, Exit Test, PCR 2D	-5	9
Omicron_Vac	9	Pre-Test, Entry Test, Exit Test, PCR 2D	-4	7
Omicron_Vac	9	Pre-Test, Entry Test, Exit Test, PCR 2D	-3	6
Omicron_Vac	9	Pre-Test, Entry Test, Exit Test, PCR 2D	-2	5
Omicron_Vac	10	Pre-Test, Entry Test, Exit Test, Test Every Day, PCR 0D	-6	5
Omicron_Vac	10	Pre-Test, Entry Test, Exit Test, Test Every Day, PCR 0D	-5	5
Omicron_Vac	10	Pre-Test, Entry Test, Exit Test, Test Every Day, PCR 0D	-4	4
Omicron_Vac	10	Pre-Test, Entry Test, Exit Test, Test Every Day, PCR 0D	-3	3
Omicron_Vac	10	Pre-Test, Entry Test, Exit Test, Test Every Day, PCR 0D	-2	2
Omicron_Vac	11	Pre-Test, Entry Test, Exit Test, Test Every Day, Antigen	-6	6
Omicron_Vac	11	Pre-Test, Entry Test, Exit Test, Test Every Day, Antigen	-5	5
Omicron_Vac	11	Pre-Test, Entry Test, Exit Test, Test Every Day, Antigen	-4	4
Omicron_Vac	11	Pre-Test, Entry Test, Exit Test, Test Every Day, Antigen	-3	3
Omicron_Vac	11	Pre-Test, Entry Test, Exit Test, Test Every Day, Antigen	-2	3
Omicron_Vac	12	Pre-Test, Entry Test, Exit Test, Test Every Day, PCR 1D	-6	6
Omicron_Vac	12	Pre-Test, Entry Test, Exit Test, Test Every Day, PCR 1D	-5	6
Omicron_Vac	12	Pre-Test, Entry Test, Exit Test, Test Every Day, PCR 1D	-4	5
Omicron_Vac	12	Pre-Test, Entry Test, Exit Test, Test Every Day, PCR 1D	-3	4
Omicron_Vac	12	Pre-Test, Entry Test, Exit Test, Test Every Day, PCR 1D	-2	3
Omicron_Vac	13	Pre-Test, Entry Test, Exit Test, Test Every Day, PCR 2D	-6	7
Omicron_Vac	13	Pre-Test, Entry Test, Exit Test, Test Every Day, PCR 2D	-5	6
Omicron_Vac	13	Pre-Test, Entry Test, Exit Test, Test Every Day, PCR 2D	-4	6
Omicron_Vac	13	Pre-Test, Entry Test, Exit Test, Test Every Day, PCR 2D	-3	5
Omicron_Vac	13	Pre-Test, Entry Test, Exit Test, Test Every Day, PCR 2D	-2	4
Omicron_Vac	14	Pre-Test, Entry Test, Exit Test, Test Every 2 Days, PCR 0D	-6	7
Omicron_Vac	14	Pre-Test, Entry Test, Exit Test, Test Every 2 Days, PCR 0D	-5	5
Omicron_Vac	14	Pre-Test, Entry Test, Exit Test, Test Every 2 Days, PCR 0D	-4	5
Omicron_Vac	14	Pre-Test, Entry Test, Exit Test, Test Every 2 Days, PCR 0D	-3	3
Omicron_Vac	14	Pre-Test, Entry Test, Exit Test, Test Every 2 Days, PCR 0D	-2	3
Omicron_Vac	15	Pre-Test, Entry Test, Exit Test, Test Every 2 Days, Antigen	-6	7
Omicron_Vac	15	Pre-Test, Entry Test, Exit Test, Test Every 2 Days, Antigen	-5	5
Omicron_Vac	15	Pre-Test, Entry Test, Exit Test, Test Every 2 Days, Antigen	-4	5
Omicron_Vac	15	Pre-Test, Entry Test, Exit Test, Test Every 2 Days, Antigen	-3	4
Omicron_Vac	15	Pre-Test, Entry Test, Exit Test, Test Every 2 Days, Antigen	-2	3
Omicron_Vac	16	Pre-Test, Entry Test, Exit Test, Test Every 2 Days, PCR 1D	-6	8
Omicron_Vac	16	Pre-Test, Entry Test, Exit Test, Test Every 2 Days, PCR 1D	-5	6
Omicron_Vac	16	Pre-Test, Entry Test, Exit Test, Test Every 2 Days, PCR 1D	-4	6
Omicron_Vac	16	Pre-Test, Entry Test, Exit Test, Test Every 2 Days, PCR 1D	-3	4
Omicron_Vac	16	Pre-Test, Entry Test, Exit Test, Test Every 2 Days, PCR 1D	-2	4
Omicron_Vac	17	Pre-Test, Entry Test, Exit Test, Test Every 2 Days, PCR 2D	-6	8
Omicron_Vac	17	Pre-Test, Entry Test, Exit Test, Test Every 2 Days, PCR 2D	-5	7
Omicron_Vac	17	Pre-Test, Entry Test, Exit Test, Test Every 2 Days, PCR 2D	-4	7
Omicron_Vac	17	Pre-Test, Entry Test, Exit Test, Test Every 2 Days, PCR 2D	-3	5
Omicron_Vac	17	Pre-Test, Entry Test, Exit Test, Test Every 2 Days, PCR 2D	-2	5
Omicron_Vac	18	Pre-Test, Entry Test, Exit Test, Test Every 3 Days, PCR 0D	-6	7
Omicron_Vac	18	Pre-Test, Entry Test, Exit Test, Test Every 3 Days, PCR 0D	-5	6
Omicron_Vac	18	Pre-Test, Entry Test, Exit Test, Test Every 3 Days, PCR 0D	-4	4
Omicron_Vac	18	Pre-Test, Entry Test, Exit Test, Test Every 3 Days, PCR 0D	-3	4
Omicron_Vac	18	Pre-Test, Entry Test, Exit Test, Test Every 3 Days, PCR 0D	-2	3
Omicron_Vac	19	Pre-Test, Entry Test, Exit Test, Test Every 3 Days, Antigen	-6	7
Omicron_Vac	19	Pre-Test, Entry Test, Exit Test, Test Every 3 Days, Antigen	-5	7
Omicron_Vac	19	Pre-Test, Entry Test, Exit Test, Test Every 3 Days, Antigen	-4	5
Omicron_Vac	19	Pre-Test, Entry Test, Exit Test, Test Every 3 Days, Antigen	-3	4
Omicron_Vac	19	Pre-Test, Entry Test, Exit Test, Test Every 3 Days, Antigen	-2	3
Omicron_Vac	20	Pre-Test, Entry Test, Exit Test, Test Every 3 Days, PCR 1D	-6	8
Omicron_Vac	20	Pre-Test, Entry Test, Exit Test, Test Every 3 Days, PCR 1D	-5	7
Omicron_Vac	20	Pre-Test, Entry Test, Exit Test, Test Every 3 Days, PCR 1D	-4	5
Omicron_Vac	20	Pre-Test, Entry Test, Exit Test, Test Every 3 Days, PCR 1D	-3	5
Omicron_Vac	20	Pre-Test, Entry Test, Exit Test, Test Every 3 Days, PCR 1D	-2	4
Omicron_Vac	21	Pre-Test, Entry Test, Exit Test, Test Every 3 Days, PCR 2D	-6	9
Omicron_Vac	21	Pre-Test, Entry Test, Exit Test, Test Every 3 Days, PCR 2D	-5	8
Omicron_Vac	21	Pre-Test, Entry Test, Exit Test, Test Every 3 Days, PCR 2D	-4	6
Omicron_Vac	21	Pre-Test, Entry Test, Exit Test, Test Every 3 Days, PCR 2D	-3	6
Omicron_Vac	21	Pre-Test, Entry Test, Exit Test, Test Every 3 Days, PCR 2D	-2	5
Prealpha	1	Quarantine Only	-6	12
Prealpha	1	Quarantine Only	-5	11
Prealpha	1	Quarantine Only	-4	9
Prealpha	1	Quarantine Only	-3	8
Prealpha	1	Quarantine Only	-2	6
Prealpha	2	Pre-Test, Entry Test, PCR 0D	-6	12
Prealpha	2	Pre-Test, Entry Test, PCR 0D	-5	11
Prealpha	2	Pre-Test, Entry Test, PCR 0D	-4	9
Prealpha	2	Pre-Test, Entry Test, PCR 0D	-3	7
Prealpha	2	Pre-Test, Entry Test, PCR 0D	-2	6
Prealpha	3	Pre-Test, Entry Test, Antigen	-6	12
Prealpha	3	Pre-Test, Entry Test, Antigen	-5	11
Prealpha	3	Pre-Test, Entry Test, Antigen	-4	9
Prealpha	3	Pre-Test, Entry Test, Antigen	-3	7
Prealpha	3	Pre-Test, Entry Test, Antigen	-2	6
Prealpha	4	Pre-Test, Entry Test, PCR 1D	-6	12
Prealpha	4	Pre-Test, Entry Test, PCR 1D	-5	11
Prealpha	4	Pre-Test, Entry Test, PCR 1D	-4	9
Prealpha	4	Pre-Test, Entry Test, PCR 1D	-3	7
Prealpha	4	Pre-Test, Entry Test, PCR 1D	-2	6
Prealpha	5	Pre-Test, Entry Test, PCR 2D	-6	12
Prealpha	5	Pre-Test, Entry Test, PCR 2D	-5	11
Prealpha	5	Pre-Test, Entry Test, PCR 2D	-4	9
Prealpha	5	Pre-Test, Entry Test, PCR 2D	-3	7
Prealpha	5	Pre-Test, Entry Test, PCR 2D	-2	6
Prealpha	6	Pre-Test, Entry Test, Exit Test, PCR 0D	-6	12
Prealpha	6	Pre-Test, Entry Test, Exit Test, PCR 0D	-5	9
Prealpha	6	Pre-Test, Entry Test, Exit Test, PCR 0D	-4	7
Prealpha	6	Pre-Test, Entry Test, Exit Test, PCR 0D	-3	4
Prealpha	6	Pre-Test, Entry Test, Exit Test, PCR 0D	-2	3
Prealpha	7	Pre-Test, Entry Test, Exit Test, Antigen	-6	12
Prealpha	7	Pre-Test, Entry Test, Exit Test, Antigen	-5	10
Prealpha	7	Pre-Test, Entry Test, Exit Test, Antigen	-4	7
Prealpha	7	Pre-Test, Entry Test, Exit Test, Antigen	-3	4
Prealpha	7	Pre-Test, Entry Test, Exit Test, Antigen	-2	3
Prealpha	8	Pre-Test, Entry Test, Exit Test, PCR 1D	-6	11
Prealpha	8	Pre-Test, Entry Test, Exit Test, PCR 1D	-5	9
Prealpha	8	Pre-Test, Entry Test, Exit Test, PCR 1D	-4	6
Prealpha	8	Pre-Test, Entry Test, Exit Test, PCR 1D	-3	5
Prealpha	8	Pre-Test, Entry Test, Exit Test, PCR 1D	-2	4
Prealpha	9	Pre-Test, Entry Test, Exit Test, PCR 2D	-6	11
Prealpha	9	Pre-Test, Entry Test, Exit Test, PCR 2D	-5	8
Prealpha	9	Pre-Test, Entry Test, Exit Test, PCR 2D	-4	6
Prealpha	9	Pre-Test, Entry Test, Exit Test, PCR 2D	-3	5
Prealpha	9	Pre-Test, Entry Test, Exit Test, PCR 2D	-2	4
Prealpha	10	Pre-Test, Entry Test, Exit Test, Test Every Day, PCR 0D	-6	4
Prealpha	10	Pre-Test, Entry Test, Exit Test, Test Every Day, PCR 0D	-5	4
Prealpha	10	Pre-Test, Entry Test, Exit Test, Test Every Day, PCR 0D	-4	3
Prealpha	10	Pre-Test, Entry Test, Exit Test, Test Every Day, PCR 0D	-3	3
Prealpha	10	Pre-Test, Entry Test, Exit Test, Test Every Day, PCR 0D	-2	2
Prealpha	11	Pre-Test, Entry Test, Exit Test, Test Every Day, Antigen	-6	5
Prealpha	11	Pre-Test, Entry Test, Exit Test, Test Every Day, Antigen	-5	4
Prealpha	11	Pre-Test, Entry Test, Exit Test, Test Every Day, Antigen	-4	3
Prealpha	11	Pre-Test, Entry Test, Exit Test, Test Every Day, Antigen	-3	3
Prealpha	11	Pre-Test, Entry Test, Exit Test, Test Every Day, Antigen	-2	2
Prealpha	12	Pre-Test, Entry Test, Exit Test, Test Every Day, PCR 1D	-6	5
Prealpha	12	Pre-Test, Entry Test, Exit Test, Test Every Day, PCR 1D	-5	5
Prealpha	12	Pre-Test, Entry Test, Exit Test, Test Every Day, PCR 1D	-4	4
Prealpha	12	Pre-Test, Entry Test, Exit Test, Test Every Day, PCR 1D	-3	4
Prealpha	12	Pre-Test, Entry Test, Exit Test, Test Every Day, PCR 1D	-2	3
Prealpha	13	Pre-Test, Entry Test, Exit Test, Test Every Day, PCR 2D	-6	6
Prealpha	13	Pre-Test, Entry Test, Exit Test, Test Every Day, PCR 2D	-5	6
Prealpha	13	Pre-Test, Entry Test, Exit Test, Test Every Day, PCR 2D	-4	5
Prealpha	13	Pre-Test, Entry Test, Exit Test, Test Every Day, PCR 2D	-3	5
Prealpha	13	Pre-Test, Entry Test, Exit Test, Test Every Day, PCR 2D	-2	4
Prealpha	14	Pre-Test, Entry Test, Exit Test, Test Every 2 Days, PCR 0D	-6	5
Prealpha	14	Pre-Test, Entry Test, Exit Test, Test Every 2 Days, PCR 0D	-5	5
Prealpha	14	Pre-Test, Entry Test, Exit Test, Test Every 2 Days, PCR 0D	-4	3
Prealpha	14	Pre-Test, Entry Test, Exit Test, Test Every 2 Days, PCR 0D	-3	3
Prealpha	14	Pre-Test, Entry Test, Exit Test, Test Every 2 Days, PCR 0D	-2	3
Prealpha	15	Pre-Test, Entry Test, Exit Test, Test Every 2 Days, Antigen	-6	5
Prealpha	15	Pre-Test, Entry Test, Exit Test, Test Every 2 Days, Antigen	-5	5
Prealpha	15	Pre-Test, Entry Test, Exit Test, Test Every 2 Days, Antigen	-4	4
Prealpha	15	Pre-Test, Entry Test, Exit Test, Test Every 2 Days, Antigen	-3	3
Prealpha	15	Pre-Test, Entry Test, Exit Test, Test Every 2 Days, Antigen	-2	3
Prealpha	16	Pre-Test, Entry Test, Exit Test, Test Every 2 Days, PCR 1D	-6	6
Prealpha	16	Pre-Test, Entry Test, Exit Test, Test Every 2 Days, PCR 1D	-5	6
Prealpha	16	Pre-Test, Entry Test, Exit Test, Test Every 2 Days, PCR 1D	-4	4
Prealpha	16	Pre-Test, Entry Test, Exit Test, Test Every 2 Days, PCR 1D	-3	4
Prealpha	16	Pre-Test, Entry Test, Exit Test, Test Every 2 Days, PCR 1D	-2	3
Prealpha	17	Pre-Test, Entry Test, Exit Test, Test Every 2 Days, PCR 2D	-6	7
Prealpha	17	Pre-Test, Entry Test, Exit Test, Test Every 2 Days, PCR 2D	-5	6
Prealpha	17	Pre-Test, Entry Test, Exit Test, Test Every 2 Days, PCR 2D	-4	5
Prealpha	17	Pre-Test, Entry Test, Exit Test, Test Every 2 Days, PCR 2D	-3	5
Prealpha	17	Pre-Test, Entry Test, Exit Test, Test Every 2 Days, PCR 2D	-2	4
Prealpha	18	Pre-Test, Entry Test, Exit Test, Test Every 3 Days, PCR 0D	-6	7
Prealpha	18	Pre-Test, Entry Test, Exit Test, Test Every 3 Days, PCR 0D	-5	4
Prealpha	18	Pre-Test, Entry Test, Exit Test, Test Every 3 Days, PCR 0D	-4	4
Prealpha	18	Pre-Test, Entry Test, Exit Test, Test Every 3 Days, PCR 0D	-3	4
Prealpha	18	Pre-Test, Entry Test, Exit Test, Test Every 3 Days, PCR 0D	-2	3
Prealpha	19	Pre-Test, Entry Test, Exit Test, Test Every 3 Days, Antigen	-6	7
Prealpha	19	Pre-Test, Entry Test, Exit Test, Test Every 3 Days, Antigen	-5	5
Prealpha	19	Pre-Test, Entry Test, Exit Test, Test Every 3 Days, Antigen	-4	4
Prealpha	19	Pre-Test, Entry Test, Exit Test, Test Every 3 Days, Antigen	-3	4
Prealpha	19	Pre-Test, Entry Test, Exit Test, Test Every 3 Days, Antigen	-2	3
Prealpha	20	Pre-Test, Entry Test, Exit Test, Test Every 3 Days, PCR 1D	-6	7
Prealpha	20	Pre-Test, Entry Test, Exit Test, Test Every 3 Days, PCR 1D	-5	5
Prealpha	20	Pre-Test, Entry Test, Exit Test, Test Every 3 Days, PCR 1D	-4	5
Prealpha	20	Pre-Test, Entry Test, Exit Test, Test Every 3 Days, PCR 1D	-3	4
Prealpha	20	Pre-Test, Entry Test, Exit Test, Test Every 3 Days, PCR 1D	-2	3
Prealpha	21	Pre-Test, Entry Test, Exit Test, Test Every 3 Days, PCR 2D	-6	7
Prealpha	21	Pre-Test, Entry Test, Exit Test, Test Every 3 Days, PCR 2D	-5	6
Prealpha	21	Pre-Test, Entry Test, Exit Test, Test Every 3 Days, PCR 2D	-4	6
Prealpha	21	Pre-Test, Entry Test, Exit Test, Test Every 3 Days, PCR 2D	-3	5
Prealpha	21	Pre-Test, Entry Test, Exit Test, Test Every 3 Days, PCR 2D	-2	4
